# Supplementary material for: HSV-1 single-cell analysis reveals the activation of anti-viral and developmental programs in distinct sub-populations
Source: eLife. 2019 May 15;8:e46339. doi: 10.7554/eLife.46339 (PMC6570482; doi:10.7554/eLife.46339)
Supplement: Supplementary file 1. — (A) Genes that are upregulated in highly infected cells (wildtype infection). (B) GO annotations associated with genes from tab (A). (C) Transcription factors enriched in the promoters of genes from tab (A). (D) Genes that are upregulated in highly infected cells (ΔICP0 infection). (E) GO annotations associated with genes from tab (D). (F) Transcription factors enriched in the promoters of genes from tab (D). [file elife-46339-supp1.xlsx]

## Sheet: a. up in wt highly infected
Gene	Median_expression_cluster_1	Median_expression_cluster_2	pvalue_FDR_corrected
ADAMTS1	0.524949	0.0780579	9.86945e-05
BRD2	0.824484	-0.577423	4.27239e-06
CCNL1	-0.488631	-0.532618	0.0131783
FUS	0.490464	0.156536	0.0384279
GATA6	-0.200747	-0.206192	0.000111268
GTF2F1	-0.48569	-0.543455	1.22096e-05
H2AFX	-0.241551	-0.282157	0.0419891
MALAT1	0.472955	-0.0985754	1.02871e-08
MSX1	-0.233013	-0.253542	0.00777138
MT-CO1	0.432953	0.0561731	0.000344764
MT-CO3	0.297923	-0.103521	6.48663e-05
MT-RNR1	0.863234	0.134772	2.75112e-16
MT-RNR2	0.270741	-0.111484	0.00298749
MT-TL1	0.877029	-0.616203	8.04648e-07
MT-TM	-0.247281	-0.291747	2.29303e-06
NEAT1	0.433658	0.145847	0.0243522
NEFM	-0.28946	-0.421393	6.40505e-09
NOP56	0.451904	0.0347305	0.00218493
PCSK5	1.43833	-0.496624	9.10975e-26
RBBP6	0.628324	-0.63725	0.0360319
SRGAP1	0.463318	0.214963	0.042484

## Sheet: b. GO wt highly infected
Overlap Results
Collection(s):	BP
# overlaps shown:	7
# genesets in collections:	4436
# genes in comparison (n):	15
# genes in universe (N):	45956
Gene Set Name	# Genes in Gene Set (K)	Description	# Genes in Overlap (k)	k/K	p-value	FDR q-value	% of gene in comparison
GO_REPRODUCTION	1297	The production of new individuals that contain some portion of genetic material inherited from one or more parent organisms.	5	0.0039	4.21e-05	0.0363	33.3333
GO_HEART_DEVELOPMENT	466	The process whose specific outcome is the progression of the heart over time, from its formation to the mature structure. The heart is a hollow, muscular organ, which, by contracting rhythmically, keeps up the circulation of the blood.	4	0.0086	1.3e-05	0.0296	26.6667
GO_EMBRYO_DEVELOPMENT_ENDING_IN_BIRTH_OR_EGG_HATCHING	554	The process whose specific outcome is the progression of an embryo over time, from zygote formation until the end of the embryonic life stage. The end of the embryonic life stage is organism-specific and may be somewhat arbitrary; for mammals it is usually considered to be birth, for insects the hatching of the first instar larva from the eggshell.	4	0.0072	2.57e-05	0.0363	26.6667
GO_CARDIAC_CHAMBER_DEVELOPMENT	144	The progression of a cardiac chamber over time, from its formation to the mature structure. A cardiac chamber is an enclosed cavity within the heart.	3	0.0208	1.33e-05	0.0296	20
GO_HEART_MORPHOGENESIS	212	The developmental process in which the heart is generated and organized. The heart is a hollow, muscular organ, which, by contracting rhythmically, keeps up the circulation of the blood.	3	0.0142	4.23e-05	0.0363	20
GO_POSITIVE_REGULATION_OF_BMP_SIGNALING_PATHWAY	32	Any process that activates or increases the frequency, rate or extent of BMP signaling pathway activity.	2	0.0625	4.9e-05	0.0363	13.3333
GO_CORONARY_VASCULATURE_DEVELOPMENT	37	The process whose specific outcome is the progression of the blood vessels of the heart over time, from its formation to the mature structure.	2	0.0541	6.58e-05	0.0417	13.3333

## Sheet: c. TF wt highly infected
Overlap Results
Collection(s):	TFT
# overlaps shown:	9
# genesets in collections:	615
# genes in comparison (n):	15
# genes in universe (N):	45956
Gene Set Name	# Genes in Gene Set (K)	Description	# Genes in Overlap (k)	k/K	p-value	FDR q-value	% from comparison
CTTTGT_LEF1_Q2	1972	Genes having at least one occurence of the highly conserved motif M13 CTTTGT sites. The motif matches transcription factor binding site V$LEF1_Q2 (v7.4 TRANSFAC).	5	0.0025	0.000303	0.0233	33.3333
CACGTG_MYC_Q2	1032	Genes having at least one occurence of the highly conserved motif M2 CACGTG sites. The motif matches transcription factor binding site V$MYC_Q2 (v7.4 TRANSFAC).	4	0.0039	0.000283	0.0233	26.6667
NMYC_01	271	Genes having at least one occurence of the transcription factor binding site V$NMYC_01 (v7.4 TRANSFAC) in the regions spanning up to 4 kb around their transcription starting sites.	3	0.0111	8.76e-05	0.0108	20
LFA1_Q6	246	Genes having at least one occurence of the transcription factor binding site V$LFA1_Q6 (v7.4 TRANSFAC) in the regions spanning up to 4 kb around their transcription starting sites.	3	0.0122	6.57e-05	0.0108	20
ZIC2_01	247	Genes having at least one occurence of the transcription factor binding site V$ZIC2_01 (v7.4 TRANSFAC) in the regions spanning up to 4 kb around their transcription starting sites.	3	0.0121	6.65e-05	0.0108	20
USF_Q6	259	Genes having at least one occurence of the transcription factor binding site V$USF_Q6 (v7.4 TRANSFAC) in the regions spanning up to 4 kb around their transcription starting sites.	3	0.0116	7.66e-05	0.0108	20
EGR1_01	269	Genes having at least one occurence of the transcription factor binding site V$EGR1_01 (v7.4 TRANSFAC) in the regions spanning up to 4 kb around their transcription starting sites.	3	0.0112	8.57e-05	0.0108	20
E2F_01	67	Genes having at least one occurence of the transcription factor binding site V$E2F_01 (v7.4 TRANSFAC) in the regions spanning up to 4 kb around their transcription starting sites.	2	0.0299	0.000217	0.0223	13.3333
EGR3_01	86	Genes having at least one occurence of the transcription factor binding site V$EGR3_01 (v7.4 TRANSFAC) in the regions spanning up to 4 kb around their transcription starting sites.	2	0.0233	0.000358	0.0244	13.3333

## Sheet: d. up in dICP0 highly infected
Gene	Median_expression_cluster_4	Median_expression_cluster_1	pvalue_FDR_corrected
ADAMTS1	0.379543	-0.33789	7.38742e-06
ADM	0.833037	-0.732068	5.5719e-06
ARID4B	0.63459	-0.4517	6.32231e-07
ARL6IP1	0.714921	-0.441678	0.000832934
ASH1L	0.601225	0.0123882	9.58892e-05
BCL2L11	-0.527298	-0.536063	0.0138269
BRD2	1.1478	-0.907353	1.54745e-15
CCNK	1.18638	-0.630505	4.04446e-09
CCNL1	1.02957	-0.6624	2.52215e-17
CCNL2	0.486794	-0.0747768	0.0010265
CDK6	0.856589	-0.792487	3.88312e-06
CDKN1A	0.725931	-0.673284	0.00778303
CELF1	0.569126	-0.867441	0.00515125
CHD2	0.769897	-0.70768	2.10532e-06
CLK1	0.38666	-0.607735	0.00532652
COL1A1	0.401415	-0.154884	3.16459e-05
CPEB2	-0.47957	-0.535555	0.0263401
CTR9	1.15014	-1.00265	6.92113e-12
CYR61	0.460364	-0.156594	0.0393348
DDX5	0.517252	-0.187816	6.86632e-08
DGKH	-0.55966	-0.678451	0.000393013
DNAJA1	0.805207	-0.745818	0.0492623
EIF1	0.686525	0.237275	0.00339285
EIF4A2	0.529144	-0.915676	1.02876e-05
ELL2	0.538366	-0.10571	2.03222e-05
FBXW7	-0.514169	-0.580236	0.000753003
FOS	-0.326593	-0.392623	8.68137e-05
FUS	0.458843	-0.230246	1.46073e-07
GADD45A	1.12946	-0.686338	5.10183e-09
GADD45B	1.10627	-0.647226	1.84024e-07
GTPBP4	0.452448	-0.0540604	0.000294696
H2AFX	-0.243087	-0.317689	0.000242242
HIVEP2	-0.369831	-0.39001	0.0461151
HLA-E	1.05582	-0.614436	0.00538494
HNRNPA2B1	0.250554	-0.222787	0.0435646
HNRNPAB	0.847293	-0.78609	1.89989e-05
HNRNPH1	0.44027	-0.175689	0.000607249
HNRNPH3	0.464048	-0.059704	2.6525e-06
HSPA1A	0.834251	-0.531466	1.64149e-07
HSPA1B	-0.413277	-0.473607	0.00248941
IFRD1	-0.357577	-0.449838	0.000169912
IMMT	0.656939	0.0655749	0.00903472
JUNB	1.4359	-0.565801	3.62305e-11
KIF1B	0.681855	-0.895174	0.000242242
KPNB1	0.30474	-0.0675622	0.0187293
LSMEM1	-0.223421	-0.23907	0.0431752
MALAT1	0.335421	-0.719171	2.08403e-10
MT-CO1	0.0424471	-0.331878	0.00028441
MT-CO3	0.0419589	-0.379276	0.00757583
MT-ND1	0.28889	-0.251535	0.00536211
MT-ND2	0.269445	-0.30456	0.000634541
MT-RNR1	0.957165	-0.891472	4.77332e-11
MT-TL1	0.961085	-0.65545	2.50197e-07
MT-TM	-0.223134	-0.270211	0.000815083
MTCO1P40	0.269616	-0.12027	0.00848091
NEAT1	0.494369	-0.171381	0.000147409
NFAT5	0.556023	-0.7391	0.00381573
NFKBIA	0.655243	-0.310922	0.0114971
NOP56	0.20683	-0.175299	0.0197675
NUFIP2	0.424845	-0.143942	0.000917551
NUP50	-0.403509	-0.445499	0.0365366
PCYT1A	0.769021	-0.530354	0.00545645
PLK2	1.00079	-0.584399	3.59918e-09
POLR2A	1.23875	-0.699712	2.57523e-11
PPP1R15A	-0.501054	-0.508788	0.0106764
PRPF4B	0.245396	-0.0901363	0.00254652
PTMA	0.609863	0.0987395	0.000159402
RASAL2	-0.488974	-0.517125	0.00312869
RASD1	1.36357	-0.55219	6.98673e-10
RBBP6	0.546361	-1.04476	4.84231e-06
RBM25	0.333148	-0.194994	0.0272494
RBM33	-0.533815	-0.551772	0.0272494
RBM39	0.543341	-0.193086	0.00072515
RNF168	0.31976	-0.752043	0.0024473
RSRC2	0.372649	-1.00102	0.0224304
SAFB2	0.687982	-0.127309	2.95015e-07
SCAF4	0.810833	-0.701107	0.000314434
SLC16A1	1.02527	-0.703207	2.56724e-05
SNHG12	0.375178	-0.743604	0.00297827
SRRT	0.204441	-0.731815	0.00370866
SRSF2	0.867097	-0.13798	3.61032e-12
TNFRSF10D	-0.369263	-0.424626	0.000101344
TNRC6A	0.72787	-0.761493	0.00232584
TSPYL2	0.618954	-0.56791	0.0368095
TUBB2A	1.48769	-0.645169	4.9666e-16
UBC	0.671947	-0.326738	0.00854728
YTHDC1	0.653216	-0.943995	2.34607e-05
YY1	0.805128	-0.107154	1.98473e-14
ZMYM2	-0.527228	-0.588477	0.0479574
ZNF26	-0.408652	-0.470922	0.00300826
ZNF654	-0.468004	-0.499594	0.0437563

## Sheet: e. GO dICP0 highly infected
Overlap Results
Collection(s):	BP
# overlaps shown:	20
# genesets in collections:	4436
# genes in comparison (n):	82
# genes in universe (N):	45956
Gene Set Name	# Genes in Gene Set (K)	Description	# Genes in Overlap (k)	k/K	p-value	FDR q-value	% in comparison
GO_CELLULAR_RESPONSE_TO_STRESS	1565	Any process that results in a change in state or activity of a cell (in terms of movement, secretion, enzyme production, gene expression, etc.) as a result of a stimulus indicating the organism is under stress. The stress is usually, but not necessarily, exogenous (e.g. temperature, humidity, ionizing radiation).	22	0.0141	3.18e-14	7.04e-11	26.8293
GO_REGULATION_OF_TRANSCRIPTION_FROM_RNA_POLYMERASE_II_PROMOTER	1784	Any process that modulates the frequency, rate or extent of transcription from an RNA polymerase II promoter.	21	0.0118	3.95e-12	1.95e-09	25.6098
GO_NEGATIVE_REGULATION_OF_NITROGEN_COMPOUND_METABOLIC_PROCESS	1517	Any process that stops, prevents, or reduces the frequency, rate or extent of the chemical reactions and pathways involving nitrogen or nitrogenous compounds.	20	0.0132	1.84e-12	1.12e-09	24.3902
GO_POSITIVE_REGULATION_OF_GENE_EXPRESSION	1733	Any process that increases the frequency, rate or extent of gene expression. Gene expression is the process in which a gene's coding sequence is converted into a mature gene product or products (proteins or RNA). This includes the production of an RNA transcript as well as any processing to produce a mature RNA product or an mRNA (for protein-coding genes) and the translation of that mRNA into pr…	20	0.0115	2.02e-11	8.13e-09	24.3902
GO_POSITIVE_REGULATION_OF_BIOSYNTHETIC_PROCESS	1805	Any process that activates or increases the frequency, rate or extent of the chemical reactions and pathways resulting in the formation of substances.	20	0.0111	4.15e-11	1.42e-08	24.3902
GO_RESPONSE_TO_ABIOTIC_STIMULUS	1024	Any process that results in a change in state or activity of a cell or an organism (in terms of movement, secretion, enzyme production, gene expression, etc.) as a result of an abiotic (non-living) stimulus.	18	0.0176	2.43e-13	2.15e-10	21.9512
GO_REGULATION_OF_CELL_DEATH	1472	Any process that modulates the rate or frequency of cell death. Cell death is the specific activation or halting of processes within a cell so that its vital functions markedly cease, rather than simply deteriorating gradually over time, which culminates in cell death.	18	0.0122	9.53e-11	2.82e-08	21.9512
GO_NEGATIVE_REGULATION_OF_GENE_EXPRESSION	1493	Any process that decreases the frequency, rate or extent of gene expression. Gene expression is the process in which a gene's coding sequence is converted into a mature gene product or products (proteins or RNA). This includes the production of an RNA transcript as well as any processing to produce a mature RNA product or an mRNA (for protein-coding genes) and the translation of that mRNA into pr…	18	0.0121	1.2e-10	3.32e-08	21.9512
GO_REGULATION_OF_RESPONSE_TO_STRESS	1468	Any process that modulates the frequency, rate or extent of a response to stress. Response to stress is a change in state or activity of a cell or an organism (in terms of movement, secretion, enzyme production, gene expression, etc.) as a result of a disturbance in organismal or cellular homeostasis, usually, but not necessarily, exogenous (e.g. temperature, humidity, ionizing radiation).	17	0.0116	7.81e-10	1.82e-07	20.7317
GO_CELLULAR_RESPONSE_TO_DNA_DAMAGE_STIMULUS	720	Any process that results in a change in state or activity of a cell (in terms of movement, secretion, enzyme production, gene expression, etc.) as a result of a stimulus indicating damage to its DNA from environmental insults or errors during metabolism.	16	0.0222	1.79e-13	1.98e-10	19.5122
GO_NEGATIVE_REGULATION_OF_PROTEIN_METABOLIC_PROCESS	1087	Any process that stops, prevents, or reduces the frequency, rate or extent of chemical reactions and pathways involving a protein.	16	0.0147	8.34e-11	2.64e-08	19.5122
GO_RNA_PROCESSING	835	Any process involved in the conversion of one or more primary RNA transcripts into one or more mature RNA molecules.	15	0.018	2.21e-11	8.17e-09	18.2927
GO_REGULATION_OF_CELL_CYCLE	949	Any process that modulates the rate or extent of progression through the cell cycle.	15	0.0158	1.31e-10	3.41e-08	18.2927
GO_MRNA_METABOLIC_PROCESS	611	The chemical reactions and pathways involving mRNA, messenger RNA, which is responsible for carrying the coded genetic 'message', transcribed from DNA, to sites of protein assembly at the ribosomes.	14	0.0229	4.46e-12	1.98e-09	17.0732
GO_RNA_SPLICING	367	The process of removing sections of the primary RNA transcript to remove sequences not present in the mature form of the RNA and joining the remaining sections to form the mature form of the RNA.	13	0.0354	1.18e-13	1.75e-10	15.8537
GO_MRNA_PROCESSING	432	Any process involved in the conversion of a primary mRNA transcript into one or more mature mRNA(s) prior to translation into polypeptide.	13	0.0301	9.27e-13	6.86e-10	15.8537
GO_REGULATION_OF_CELLULAR_RESPONSE_TO_STRESS	691	Any process that modulates the frequency, rate or extent of a cellular response to stress. Cellular response to stress is a change in state or activity of a cell (in terms of movement, secretion, enzyme production, gene expression, etc.) as a result of a stimulus indicating the organism is under stress. The stress is usually, but not necessarily, exogenous (e.g. temperature, humidity, ionizing ra…	13	0.0188	3.1e-10	7.63e-08	15.8537
GO_RNA_SPLICING_VIA_TRANSESTERIFICATION_REACTIONS	267	Splicing of RNA via a series of two transesterification reactions.	11	0.0412	2.01e-12	1.12e-09	13.4146
GO_REGULATION_OF_RNA_SPLICING	97	Any process that modulates the frequency, rate or extent of RNA splicing, the process of removing sections of the primary RNA transcript to remove sequences not present in the mature form of the RNA and joining the remaining sections to form the mature form of the RNA.	10	0.1031	2.05e-15	9.11e-12	12.1951
GO_REGULATION_OF_MRNA_METABOLIC_PROCESS	118	Any process that modulates the frequency, rate or extent of mRNA metabolic process.	7	0.0593	1.99e-09	4.42e-07	8.53659

## Sheet: f. TF dICP0 highly infected
Overlap Results
Collection(s):	TFT
# overlaps shown:	20
# genesets in collections:	615
# genes in comparison (n):	82
# genes in universe (N):	45956
Gene Set Name	# Genes in Gene Set (K)	Description	# Genes in Overlap (k)	k/K	p-value	FDR q-value	% in comparison
GGGCGGR_SP1_Q6	2940	Genes having at least one occurence of the highly conserved motif M6 GGGCGGR sites. The motif matches transcription factor binding site V$SP1_Q6 (v7.4 TRANSFAC).	30	0.0102	1.09e-15	2.24e-13	36.5854
CTTTGT_LEF1_Q2	1972	Genes having at least one occurence of the highly conserved motif M13 CTTTGT sites. The motif matches transcription factor binding site V$LEF1_Q2 (v7.4 TRANSFAC).	28	0.0142	3.05e-18	1.87e-15	34.1463
GGGAGGRR_MAZ_Q6	2274	Genes having at least one occurence of the highly conserved motif M24 GGGAGGRR sites. The motif matches transcription factor binding site V$MAZ_Q6 (v7.4 TRANSFAC).	28	0.0123	1.18e-16	3.63e-14	34.1463
TGGAAA_NFAT_Q4_01	1896	Genes having at least one occurence of the highly conserved motif M55 TGGAAA sites. The motif matches transcription factor binding site V$NFAT_Q4_01 (v7.4 TRANSFAC).	19	0.01	7.43e-10	5.08e-08	23.1707
TTGTTT_FOXO4_01	2061	Genes having at least one occurence of the highly conserved motif M60 TTGTTT sites. The motif matches transcription factor binding site V$FOXO4_01 (v7.4 TRANSFAC).	19	0.0092	2.93e-09	1.64e-07	23.1707
TATAAA_TATA_01	1296	Genes having at least one occurence of the highly conserved motif M51 TATAAA sites. The motif matches transcription factor binding site V$TATA_01 (v7.4 TRANSFAC).	16	0.0123	1.06e-09	6.53e-08	19.5122
AACTTT_UNKNOWN	1890	Genes having at least one occurence of the highly conserved motif M17 AACTTT in the region spanning up to 4 kb around their transcription start sites. The motif does not match any known transcription factor binding site (v7.4 TRANSFAC).	16	0.0085	2.01e-07	6.13e-06	19.5122
GTGACGY_E4F1_Q6	658	Genes having at least one occurence of the highly conserved motif M20 GTGACGY sites. The motif matches transcription factor binding site V$E4F1_Q6 (v7.4 TRANSFAC).	15	0.0228	7.66e-13	9.85e-11	18.2927
GCCATNTTG_YY1_Q6	427	Genes having at least one occurence of the highly conserved motif M10 GCCATNTTG sites. The motif matches transcription factor binding site V$YY1_Q6 (v7.4 TRANSFAC).	13	0.0304	8.01e-13	9.85e-11	15.8537
RGAANNTTC_HSF1_01	446	Genes having at least one occurence of the highly conserved motif M68 RGAANNTTC sites. The motif matches transcription factor binding site V$HSF1_01 (v7.4 TRANSFAC).	11	0.0247	4.8e-10	3.69e-08	13.4146
YY1_01	246	Genes having at least one occurence of the transcription factor binding site V$YY1_01 (v7.4 TRANSFAC) in the regions spanning up to 4 kb around their transcription starting sites.	10	0.0407	2.45e-11	2.16e-09	12.1951
KCCGNSWTTT_UNKNOWN	105	Genes having at least one occurence of the highly conserved motif M157 KCCGNSWTTT in the region spanning up to 4 kb around their transcription start sites. The motif does not match any known transcription factor binding site (v7.4 TRANSFAC).	8	0.0762	1.75e-11	1.8e-09	9.7561
E2F_Q6	232	Genes having at least one occurence of the transcription factor binding site V$E2F_Q6 (v7.4 TRANSFAC) in the regions spanning up to 4 kb around their transcription starting sites.	8	0.0345	9.66e-09	4.89e-07	9.7561
E2F_Q4	234	Genes having at least one occurence of the transcription factor binding site V$E2F_Q4 (v7.4 TRANSFAC) in the regions spanning up to 4 kb around their transcription starting sites.	8	0.0342	1.03e-08	4.89e-07	9.7561
CEBPDELTA_Q6	240	Genes having at least one occurence of the transcription factor binding site V$CEBPDELTA_Q6 (v7.4 TRANSFAC) in the regions spanning up to 4 kb around their transcription starting sites.	8	0.0333	1.26e-08	5.53e-07	9.7561
NFKB_C	263	Genes having at least one occurence of the transcription factor binding site V$NFKB_C (v7.4 TRANSFAC) in the regions spanning up to 4 kb around their transcription starting sites.	8	0.0304	2.56e-08	1.05e-06	9.7561
E2F1DP1RB_01	231	Genes having at least one occurence of the transcription factor binding site V$E2F1DP1RB_01 (v7.4 TRANSFAC) in the regions spanning up to 4 kb around their transcription starting sites.	7	0.0303	2.04e-07	6.13e-06	8.53659
E2F1_Q6	232	Genes having at least one occurence of the transcription factor binding site V$E2F1_Q6 (v7.4 TRANSFAC) in the regions spanning up to 4 kb around their transcription starting sites.	7	0.0302	2.1e-07	6.13e-06	8.53659
E2F1DP1_01	235	Genes having at least one occurence of the transcription factor binding site V$E2F1DP1_01 (v7.4 TRANSFAC) in the regions spanning up to 4 kb around their transcription starting sites.	7	0.0298	2.29e-07	6.13e-06	8.53659
GCGNNANTTCC_UNKNOWN	123	Genes having at least one occurence of the highly conserved motif M48 GCGNNANTTCC in the region spanning up to 4 kb around their transcription start sites. The motif does not match any known transcription factor binding site (v7.4 TRANSFAC).	6	0.0488	9.64e-08	3.7e-06	7.31707
