# Supplementary material for: HSV-1 single-cell analysis reveals the activation of anti-viral and developmental programs in distinct sub-populations
Source: eLife. 2019 May 15;8:e46339. doi: 10.7554/eLife.46339 (PMC6570482; doi:10.7554/eLife.46339)
Supplement: Supplementary file 2. — (A) Genes that are upregulated in ICP4-negative cells (afer wildtype infection). (B) GO annotations associated with genes from tab (A). (C) Genes that are upregulated in ICP4-negative cells (after ΔICP0 infection). (D) GO annotations associated with genes from tab (C). (E) Transcription factors enriched in the promoters of genes from tab (C). [file elife-46339-supp2.xlsx]

## Sheet: a. up in wt ICP4 negative
Gene_name	mock_1	mock_2	wt_neg_1	wt_neg_2	wt_pos_1	wt_pos_2	p_value_FDR_corrected
AL023802.1	0	0	24.9221	24.4926	0	0	1.2063e-06
AC022872.1	0	0	120.462	118.386	0	0	1.2063e-06
CRB1	0	0	7.39572	7.26825	0	0	1.2063e-06
AC243654.1	0	0	321.095	315.561	0	0	1.2063e-06
AC024145.1	0	0	121.395	119.303	0	0	1.2063e-06
RNU6-1039P	0	0	1758.52	1728.21	0	0	1.2063e-06
TLR12P	0	0	34.7675	34.1683	0	0	1.2063e-06
DNAJA1P2	0	0	78.5972	77.2426	0	0	1.2063e-06
AC079466.1	0	0	42.2551	41.5268	0	0	1.2063e-06
AC107294.2	0	0	134.21	131.896	0	0	1.2063e-06
SNORD112	0	0	425.705	418.369	0	0	1.2063e-06
AC103987.2	0	0	225.614	221.725	0	0	1.2063e-06
AC010605.1	0	0	118.044	116.009	0	0	1.2063e-06
AC134775.1	0	0	202.761	199.266	0	0	1.2063e-06
C20orf202	0	0	58.6539	57.643	0	0	1.2063e-06
AL512430.1	0	0	109.396	107.511	0	0	1.2063e-06
LINC01876	0	0	34.6395	34.0425	0	0	1.2063e-06
AC108134.4	0	0	311.526	306.157	0	0	1.2063e-06
AL353637.1	0	0	128.526	126.311	0	0	1.2063e-06
CASC18	0	0	36.3809	35.7538	0	0	1.2063e-06
AC009054.1	0	0	220.33	216.533	0	0	1.2063e-06
RPL13P6	0	0	150.289	147.699	0	0	1.2063e-06
AC003973.3	0	0	33.3384	32.7638	0	0	1.2063e-06
AC007879.4	0	0	521.224	512.241	236.487	228.433	4.47582e-06
MIR3942	874.679	787.628	2589.38	2544.76	0	0	1.839e-05
AC069542.1	171.167	154.132	506.719	497.986	0	0	1.839e-05
CSF3	1631.95	2552.34	9450.47	9141.82	2384.26	2563.08	0.000631132
SLC39A8	2677.76	3477.78	9959.8	9438.57	4255.42	4581.35	0.00104179
HMGN2P15	0	0	696.895	856.106	0	0	0.00193351
AC010980.2	0	60.8013	799.554	687.553	120.923	58.4025	0.00199135
IFIT1	909.378	1051.51	2508.55	2896.25	536.697	643.554	0.0023517
CXCL2	3940.72	5923.75	17812.6	16211.2	5065.39	5882.46	0.00259281
LINC01337	216.682	97.5585	855.281	735.473	0	0	0.0027674
MIR7107	1191.75	536.572	4704.04	4045.1	1067.15	1030.8	0.00442453
TNFSF15	72.5111	27.2061	202.735	222.681	10.8216	20.9062	0.00468759
HLX-AS1	338.686	304.979	835.532	656.905	0	0	0.00484695
AP001189.1	66.8583	90.3066	263.902	324.192	59.868	57.8291	0.00515533
AC131097.3	0	19.0781	83.6275	82.1862	37.943	36.6508	0.00583476
TPT1P12	0	87.2475	382.443	375.851	173.52	167.61	0.00583476
AC127496.2	0	0	511.309	376.873	0	0	0.0060558
AC009302.1	0	0	482.466	355.613	0	0	0.0060558
RPL18P10	0	0	349.743	257.787	0	0	0.0060558
RNU2-7P	0	0	1057.09	779.153	0	0	0.0060558
AC005332.5	0	14.7056	64.461	79.1876	0	0	0.00613403
IFIT2	2766.51	2313.24	11516.4	9187.33	3039.33	3257.55	0.00689484

## Sheet: b. GO wt ICP4 negative
Overlap Results
Collection(s):	BP
# overlaps shown:	11
# genesets in collections:	4436
# genes in comparison (n):	9
# genes in universe (N):	45956
Gene Set Name	# Genes in Gene Set (K)	Description	# Genes in Overlap (k)	k/K	p-value	FDR q-value
GO_CYTOKINE_MEDIATED_SIGNALING_PATHWAY	452	A series of molecular signals initiated by the binding of a cytokine to a receptor on the surface of a cell, and ending with regulation of a downstream cellular process, e.g. transcription.	5	0.0111	1.1e-08	4.87e-05
GO_CELLULAR_RESPONSE_TO_CYTOKINE_STIMULUS	606	Any process that results in a change in state or activity of a cell (in terms of movement, secretion, enzyme production, gene expression, etc.) as a result of a cytokine stimulus.	5	0.0083	4.73e-08	0.000105
GO_RESPONSE_TO_CYTOKINE	714	Any process that results in a change in state or activity of a cell or an organism (in terms of movement, secretion, enzyme production, gene expression, etc.) as a result of a cytokine stimulus.	5	0.007	1.07e-07	0.000158
GO_IMMUNE_RESPONSE	1100	Any immune system process that functions in the calibrated response of an organism to a potential internal or invasive threat.	5	0.0045	9.06e-07	0.001
GO_REGULATION_OF_PROTEIN_BINDING	168	Any process that modulates the frequency, rate or extent of protein binding.	3	0.0179	3.97e-06	0.00352
GO_CELLULAR_RESPONSE_TO_ORGANIC_SUBSTANCE	1848	Any process that results in a change in state or activity of a cell (in terms of movement, secretion, enzyme production, gene expression, etc.) as a result of an organic substance stimulus.	5	0.0027	1.15e-05	0.00851
GO_RESPONSE_TO_BIOTIC_STIMULUS	886	Any process that results in a change in state or activity of a cell or an organism (in terms of movement, secretion, enzyme production, gene expression, etc.) as a result of a biotic stimulus, a stimulus caused or produced by a living organism.	4	0.0045	1.6e-05	0.00901
GO_IMMUNE_SYSTEM_PROCESS	1984	Any process involved in the development or functioning of the immune system, an organismal system for calibrated responses to potential internal or invasive threats.	5	0.0025	1.63e-05	0.00901
GO_REGULATION_OF_BINDING	283	Any process that modulates the frequency, rate or extent of binding, the selective interaction of a molecule with one or more specific sites on another molecule.	3	0.0106	1.89e-05	0.00931
GO_RESPONSE_TO_TYPE_I_INTERFERON	68	Any process that results in a change in state or activity of a cell or an organism (in terms of movement, secretion, enzyme production, gene expression, etc.) as a result of a type I interferon stimulus. Type I interferons include the interferon-alpha, beta, delta, episilon, zeta, kappa, tau, and omega gene families.	2	0.0294	7.71e-05	0.0342
GO_NEGATIVE_REGULATION_OF_PROTEIN_BINDING	79	Any process that stops, prevents, or reduces the frequency, rate or extent of protein binding.	2	0.0253	0.000104	0.042

## Sheet: c. up in dICP0 ICP4 negative
Gene_name	mock_1	mock_2	D0_neg_1	D0_neg_2	D0_pos_1	D0_pos_2	p_value_FDR_corrected
NKAIN1	0	28.7417	121.412	107.891	0	0	0.00554126
AL031289.1	0	0	384.987	488.732	150.487	226.151	0.00835009
EIF2S2P5	0	0	93.6616	95.1209	0	0	8.4855e-07
HMGN3P1	0	0	469.764	477.083	0	0	8.4855e-07
RGS18	0	0	64.6218	82.0359	0	0	0.0029805
AC244034.2	0	84.3335	534.368	542.694	0	104.634	0.00453234
FAM89A	19514	14685.1	39386.4	35596.2	14152.2	16662.8	0.00658142
RSAD2	19.7228	17.7599	1500.45	2028.59	337.241	517.822	0.00942716
AC079148.1	116.41	157.237	442.805	393.492	0	65.0288	0.00407054
DNAJA1P2	0	0	75.743	76.9232	0	0	8.4855e-07
AC010980.2	0	60.8013	706.309	782.525	50.1978	75.437	0.000680692
FAM212A	8067.23	6603.96	19963.6	16777.5	4566.26	5121.01	0.00506525
AC097358.2	0	0	78.2264	79.4453	0	0	8.4855e-07
RCC2P4	0	0	87.01	88.3657	0	0	8.4855e-07
ACKR4	5201.13	6345.38	14439.3	16547.9	1247.33	3092.89	0.00361254
PTX3	889807	1.39471e+06	2.52019e+06	2.99008e+06	314098	530554	0.0091585
AC026355.3	0	0	124.71	126.653	0	0	8.4855e-07
P3H2	6463.73	9297.39	19621	22678.4	8384.12	10233.6	0.0100963
RHOH	14.428	25.9841	109.763	104.506	0	8.05971	0.00086943
CXCL6	103201	47723.7	580659	479619	60814	60699.6	0.0034408
CXCL3	9753.12	19692.8	184066	155523	67653.2	58994.8	0.00267359
PMPCAP1	0	0	57.5282	58.4245	0	0	8.4855e-07
COX7A2P2	0	0	362.658	368.308	0	0	8.4855e-07
SLC39A8	2677.76	3477.78	12102.6	14799.1	1684.48	2301.3	0.00401253
PITX2	1609.04	1944.58	4960.85	5373.48	1523.61	2147.75	0.00322543
FGF2	158947	131926	615675	516331	252717	212044	0.00523223
GUCY1A3	330.697	230.784	739.027	790.464	98.3411	129.313	0.00177172
KCTD9P5	0	0	77.4909	78.6983	0	0	8.4855e-07
AC008972.2	771.984	955.837	1835.31	2143.49	430.441	431.243	0.0037804
DBIP2	0	0	346.047	351.439	0	0	8.4855e-07
MIR3142HG	165.737	261.174	1851.9	2080.84	338.841	347.187	0.000716104
PPP1R10	42103.2	38555	110588	91785.7	48902	45731.9	0.00820233
RN7SL273P	0	0	303.225	307.95	0	0	8.4855e-07
RCC2P7	0	0	143.456	109.269	56.0754	42.1349	0.00808952
PRDM13	0	0	221.403	224.852	21.6359	65.0288	0.00214624
RSPO3	449.858	540.116	2110.46	2128.87	780.364	686.883	0.000147345
MAP7	3553.15	3483.23	7606.69	8916.95	3305.19	3617.71	0.00496048
SOD2	60397.9	48024.4	411359	394716	153616	174950	0.000204184
GSAP	985.071	982.414	2226.07	2276.1	803.21	846.125	2.65274e-05
AC092849.2	0	0	544.531	553.015	0	0	8.4855e-07
NAMPT	92094.9	79694.2	211036	190860	85252.6	88736.8	0.00204734
CCDC71L	128772	103227	276599	235991	90022.8	81561.6	0.00643513
LRRN3	2509.59	1794.57	7299.95	6831.52	1536.48	2089.11	0.00179405
AC004941.2	0	0	397.651	403.847	0	0	8.4855e-07
BX119904.1	0	0	260.53	264.589	0	0	8.4855e-07
CYP7B1	960.92	1185.07	3694.91	4519.12	900.745	1493.67	0.00917685
AC087752.2	0	0	322.649	327.676	0	0	8.4855e-07
HAS2	76363	75053.5	203119	191944	33748	40611.2	0.000171687
TIGD5	5766.39	3615.64	12682.9	13273.4	4720.9	4920.73	0.00445049
SNRPEP2	0	0	324.962	330.025	0	0	8.4855e-07
TNFSF15	72.5111	27.2061	344.775	320.968	71.8766	6.75099	0.00519556
AL450263.2	0	0	153.929	156.328	0	0	8.4855e-07
AP000907.2	0	0	256.84	260.842	0	0	8.4855e-07
B3GAT1	0	0	7.93562	8.05926	0	0	8.4855e-07
ZSWIM8-AS1	0	0	62.0989	63.0665	0	0	8.4855e-07
PLAU	43436.3	36596	89558	80013.4	34166.2	37551.8	0.00389155
STAMBPL1	10343.7	10475.2	25451.4	21071.6	4383.02	4801.1	0.00415666
IFIT3	17442.9	16194.7	189434	208377	63764.5	72544.6	0.000484161
HPS6	46068.4	34645.2	94189.7	98542.3	40162.3	43487.4	0.00268279
AC089998.3	0	0	183.903	186.769	0	0	8.4855e-07
OAS1	134.906	52.0628	2309.22	2456.88	630.42	581.355	0.000138968
OAS2	258.745	308.375	3676.37	5063.94	905.228	850.232	0.0102457
OASL	27.1083	109.847	21138.7	19360.5	9713.91	8525.61	0.000415997
RXFP2	0	0	27.3168	27.7424	0	0	8.4855e-07
AL355102.4	516.748	581.65	1105.66	1247.66	288.127	288.664	0.001729
AC022872.1	0	0	116.088	117.896	0	0	8.4855e-07
PHBP21	0	52.1577	220.327	223.76	86.1231	64.7127	0.00710824
AC009054.1	0	0	212.329	215.637	0	0	8.4855e-07
LINC02181	0	0	22.2053	22.5513	0	0	8.4855e-07
RN7SL775P	0	0	269.835	274.039	0	0	8.4855e-07
CSF3	1631.95	2552.34	22380.2	21173.6	9290.94	6381.43	0.00147634
NR1D1	5434.24	3174.52	13410	12971.2	5011.67	4976.18	0.00428829
RARA	26338.9	20623.6	53831.4	51011.2	24255.7	23133.9	0.00252411
C17orf113	101.805	80.2136	217.827	184.351	37.8427	42.6523	0.00491462
SLC16A6	8052.6	7684.57	25272.6	28035.8	7906.51	8117.96	0.000755987
AL132822.1	0	0	176.734	179.487	0	0	8.4855e-07
AC010323.1	0	0	312.636	317.507	0	91.8251	0.00660384
INSL3	0	0	98.228	99.7585	0	0	8.4855e-07
AF038458.2	0	0	302.215	230.193	0	0	0.00436677
TMEM150B	0	0	52.9273	53.7519	0	0	8.4855e-07
ZNF583	5535.87	4958.3	14229.6	13154.7	5118.08	6449.17	0.00239563
APOL3	1308.68	1367.57	3334.04	3503.02	1081.03	1236.47	0.00029499
MX2	168.071	111.863	1188.29	1245.62	434.609	330.646	0.000549968

## Sheet: d. GO dICP0 ICP4 negative
Overlap Results
Collection(s):	BP
# overlaps shown:	20
# genesets in collections:	4436
# genes in comparison (n):	41
# genes in universe (N):	45956
Gene Set Name	# Genes in Gene Set (K)	Description	# Genes in Overlap (k)	k/K	p-value	FDR q-value
GO_RESPONSE_TO_BIOTIC_STIMULUS	886	Any process that results in a change in state or activity of a cell or an organism (in terms of movement, secretion, enzyme production, gene expression, etc.) as a result of a biotic stimulus, a stimulus caused or produced by a living organism.	14	0.0158	1.93e-14	8.55e-11
GO_RESPONSE_TO_CYTOKINE	714	Any process that results in a change in state or activity of a cell or an organism (in terms of movement, secretion, enzyme production, gene expression, etc.) as a result of a cytokine stimulus.	12	0.0168	9.45e-13	1.55e-09
GO_REGULATION_OF_CELL_PROLIFERATION	1496	Any process that modulates the frequency, rate or extent of cell proliferation.	15	0.01	1.3e-12	1.55e-09
GO_RESPONSE_TO_EXTERNAL_STIMULUS	1821	Any process that results in a change in state or activity of a cell or an organism (in terms of movement, secretion, enzyme production, gene expression, etc.) as a result of an external stimulus.	16	0.0088	1.39e-12	1.55e-09
GO_CELLULAR_RESPONSE_TO_ORGANIC_SUBSTANCE	1848	Any process that results in a change in state or activity of a cell (in terms of movement, secretion, enzyme production, gene expression, etc.) as a result of an organic substance stimulus.	16	0.0087	1.74e-12	1.55e-09
GO_CELLULAR_RESPONSE_TO_CYTOKINE_STIMULUS	606	Any process that results in a change in state or activity of a cell (in terms of movement, secretion, enzyme production, gene expression, etc.) as a result of a cytokine stimulus.	11	0.0182	4.23e-12	3.13e-09
GO_CYTOKINE_MEDIATED_SIGNALING_PATHWAY	452	A series of molecular signals initiated by the binding of a cytokine to a receptor on the surface of a cell, and ending with regulation of a downstream cellular process, e.g. transcription.	10	0.0221	6.55e-12	4.15e-09
GO_RESPONSE_TO_TYPE_I_INTERFERON	68	Any process that results in a change in state or activity of a cell or an organism (in terms of movement, secretion, enzyme production, gene expression, etc.) as a result of a type I interferon stimulus. Type I interferons include the interferon-alpha, beta, delta, episilon, zeta, kappa, tau, and omega gene families.	6	0.0882	3.61e-11	2e-08
GO_IMMUNE_RESPONSE	1100	Any immune system process that functions in the calibrated response of an organism to a potential internal or invasive threat.	11	0.01	2.3e-09	1.14e-06
GO_DEFENSE_RESPONSE_TO_VIRUS	164	Reactions triggered in response to the presence of a virus that act to protect the cell or organism.	6	0.0366	7.64e-09	3.39e-06
GO_IMMUNE_SYSTEM_PROCESS	1984	Any process involved in the development or functioning of the immune system, an organismal system for calibrated responses to potential internal or invasive threats.	13	0.0066	9.87e-09	3.84e-06
GO_IMMUNE_EFFECTOR_PROCESS	486	Any process of the immune system that can potentially contribute to an immune response.	8	0.0165	1.04e-08	3.84e-06
GO_POSITIVE_REGULATION_OF_CELL_PROLIFERATION	814	Any process that activates or increases the rate or extent of cell proliferation.	9	0.0111	3.47e-08	1.18e-05
GO_RESPONSE_TO_VIRUS	247	Any process that results in a change in state or activity of a cell or an organism (in terms of movement, secretion, enzyme production, gene expression, etc.) as a result of a stimulus from a virus.	6	0.0243	8.71e-08	2.76e-05
GO_DEFENSE_RESPONSE	1231	Reactions, triggered in response to the presence of a foreign body or the occurrence of an injury, which result in restriction of damage to the organism attacked or prevention/recovery from the infection caused by the attack.	10	0.0081	9.66e-08	2.86e-05
GO_DEFENSE_RESPONSE_TO_OTHER_ORGANISM	505	Reactions triggered in response to the presence of another organism that act to protect the cell or organism from damage caused by that organism.	7	0.0139	3.02e-07	8.38e-05
GO_POSITIVE_REGULATION_OF_BIOSYNTHETIC_PROCESS	1805	Any process that activates or increases the frequency, rate or extent of the chemical reactions and pathways resulting in the formation of substances.	11	0.0061	3.54e-07	9.24e-05
GO_RESPONSE_TO_MOLECULE_OF_BACTERIAL_ORIGIN	321	Any process that results in a change in state or activity of an organism (in terms of movement, secretion, enzyme production, gene expression, etc.) as a result of a stimulus by molecules of bacterial origin such as peptides derived from bacterial flagellin.	6	0.0187	4.06e-07	0.0001
GO_RESPONSE_TO_INTERFERON_ALPHA	20	Any process that results in a change in state or activity of a cell or an organism (in terms of movement, secretion, enzyme production, gene expression, etc.) as a result of an interferon-alpha stimulus. Interferon-alpha is a type I interferon.	3	0.15	7.43e-07	0.000174
GO_INNATE_IMMUNE_RESPONSE	619	Innate immune responses are defense responses mediated by germline encoded components that directly recognize components of potential pathogens.	7	0.0113	1.18e-06	0.000261

## Sheet: e. TF dICP0 ICP4 negative
Overlap Results
Collection(s):	TFT
# overlaps shown:	20
# genesets in collections:	615
# genes in comparison (n):	41
# genes in universe (N):	45956
Gene Set Name	# Genes in Gene Set (K)	Description	# Genes in Overlap (k)	k/K	p-value	FDR q-value
IRF7_01	252	Genes having at least one occurence of the transcription factor binding site V$IRF7_01 (v7.4 TRANSFAC) in the regions spanning up to 4 kb around their transcription starting sites.	5	0.0198	3.04e-06	0.00187
STTTCRNTTT_IRF_Q6	188	Genes having at least one occurence of the highly conserved motif M85 STTTCRNTTT sites. The motif matches transcription factor binding site V$IRF_Q6 (v7.4 TRANSFAC).	4	0.0213	2.44e-05	0.0075
TGANTCA_AP1_C	1121	Genes having at least one occurence of the highly conserved motif M7 TGANTCA sites. The motif matches transcription factor binding site V$AP1_C (v7.4 TRANSFAC).	7	0.0062	5.49e-05	0.0085
CAGGTA_AREB6_01	792	Genes having at least one occurence of the highly conserved motif M76 CAGGTA sites. The motif matches transcription factor binding site V$AREB6_01 (v7.4 TRANSFAC).	6	0.0076	6.91e-05	0.0085
HFH1_01	243	Genes having at least one occurence of the transcription factor binding site V$HFH1_01 (v7.4 TRANSFAC) in the regions spanning up to 4 kb around their transcription starting sites.	4	0.0165	6.62e-05	0.0085
TGCTGAY_UNKNOWN	538	Genes having at least one occurence of the highly conserved motif M92 TGCTGAY in the region spanning up to 4 kb around their transcription start sites. The motif does not match any known transcription factor binding site (v7.4 TRANSFAC).	5	0.0093	0.000114	0.00916
BACH2_01	271	Genes having at least one occurence of the transcription factor binding site V$BACH2_01 (v7.4 TRANSFAC) in the regions spanning up to 4 kb around their transcription starting sites.	4	0.0148	0.000101	0.00916
TATA_C	283	Genes having at least one occurence of the transcription factor binding site V$TATA_C (v7.4 TRANSFAC) in the regions spanning up to 4 kb around their transcription starting sites.	4	0.0141	0.000119	0.00916
GGGAGGRR_MAZ_Q6	2274	Genes having at least one occurence of the highly conserved motif M24 GGGAGGRR sites. The motif matches transcription factor binding site V$MAZ_Q6 (v7.4 TRANSFAC).	9	0.004	0.000145	0.00993
ARGGGTTAA_UNKNOWN	121	Genes having at least one occurence of the highly conserved motif M65 ARGGGTTAA in the region spanning up to 4 kb around their transcription start sites. The motif does not match any known transcription factor binding site (v7.4 TRANSFAC).	3	0.0248	0.000176	0.0108
CTTTAAR_UNKNOWN	972	Genes having at least one occurence of the highly conserved motif M29 CTTTAAR in the region spanning up to 4 kb around their transcription start sites. The motif does not match any known transcription factor binding site (v7.4 TRANSFAC).	6	0.0062	0.000211	0.0118
TGGAAA_NFAT_Q4_01	1896	Genes having at least one occurence of the highly conserved motif M55 TGGAAA sites. The motif matches transcription factor binding site V$NFAT_Q4_01 (v7.4 TRANSFAC).	8	0.0042	0.000234	0.012
STAT5A_02	141	Genes having at least one occurence of the transcription factor binding site V$STAT5A_02 (v7.4 TRANSFAC) in the regions spanning up to 4 kb around their transcription starting sites.	3	0.0213	0.000277	0.0131
YATTNATC_UNKNOWN	377	Genes having at least one occurence of the highly conserved motif M97 YATTNATC in the region spanning up to 4 kb around their transcription start sites. The motif does not match any known transcription factor binding site (v7.4 TRANSFAC).	4	0.0106	0.000355	0.0156
TTGTTT_FOXO4_01	2061	Genes having at least one occurence of the highly conserved motif M60 TTGTTT sites. The motif matches transcription factor binding site V$FOXO4_01 (v7.4 TRANSFAC).	8	0.0039	0.00041	0.0168
TAAYNRNNTCC_UNKNOWN	172	Genes having at least one occurence of the highly conserved motif M136 TAAYNRNNTCC in the region spanning up to 4 kb around their transcription start sites. The motif does not match any known transcription factor binding site (v7.4 TRANSFAC).	3	0.0174	0.000495	0.019
CTTTGA_LEF1_Q2	1232	Genes having at least one occurence of the highly conserved motif M73 CTTTGA sites. The motif matches transcription factor binding site V$LEF1_Q2 (v7.4 TRANSFAC).	6	0.0049	0.000739	0.0265
TATAAA_TATA_01	1296	Genes having at least one occurence of the highly conserved motif M51 TATAAA sites. The motif matches transcription factor binding site V$TATA_01 (v7.4 TRANSFAC).	6	0.0046	0.000961	0.0265
HNF3B_01	221	Genes having at least one occurence of the transcription factor binding site V$HNF3B_01 (v7.4 TRANSFAC) in the regions spanning up to 4 kb around their transcription starting sites.	3	0.0136	0.00102	0.0265
FAC1_01	222	Genes having at least one occurence of the transcription factor binding site V$FAC1_01 (v7.4 TRANSFAC) in the regions spanning up to 4 kb around their transcription starting sites.	3	0.0135	0.00104	0.0265
