# Supplementary material for: HSV-1 single-cell analysis reveals the activation of anti-viral and developmental programs in distinct sub-populations
Source: eLife. 2019 May 15;8:e46339. doi: 10.7554/eLife.46339 (PMC6570482; doi:10.7554/eLife.46339)
Supplement: Supplementary file 3. — (A) Genes that are upregulated in ICP4-positive cells (after wildtype infection). (B) GO annotations associated with genes from tab (A). (C) Transcription factors that are enriched in the promoters of genes from tab (A). (D) Genes that are upregulated in ICP4-positive cells (after ΔICP0 infection). (E) GO annotations associated with genes from tab (D). (F) Transcription factors that are enriched in the promoters of genes from tab (D). [file elife-46339-supp3.xlsx]

## Sheet: a. wt ICP4 positive
Gene_name	mock_1	mock_2	wt_neg_1	wt_neg_2	wt_pos_1	wt_pos_2	p_value_FDR_corrected
AL049830.3	0	0	0	0	1001.32	1003.04	1.16391e-09
AC011511.5	0	26.6702	58.4535	71.8076	1538.23	1562.7	3.81372e-06
IRF4	452.614	160.116	574.248	1716.57	44220.2	44308.2	4.59638e-06
MGC16275	37.8033	119.144	261.129	476.595	10155.3	10299.9	4.60693e-06
NUAK1	11604.6	11509.3	16150	15475.9	38020.2	37725.6	6.39772e-06
RBFOX3	9.65664	8.69558	47.6455	65.5541	1115.46	1144.29	6.79163e-06
LONRF3	306.711	138.093	1024.39	1098.26	14894.1	15325.6	7.79362e-06
AC025174.1	0	0	0	0	3183.36	3074.94	9.54398e-06
RN7SKP196	0	0	0	0	247.455	239.027	9.54398e-06
AC097637.2	0	0	0	0	128.25	123.882	9.54398e-06
RNA5SP375	0	0	0	0	717.41	692.978	9.54398e-06
AC148477.1	0	0	0	0	179.353	173.244	9.54398e-06
SYF2P2	0	0	0	0	146.435	141.448	9.54398e-06
AL772337.1	0	0	0	0	84.7784	81.8911	9.54398e-06
AC118757.1	0	0	0	0	350.363	338.431	9.54398e-06
LINC00868	0	0	0	0	81.5395	78.7625	9.54398e-06
MIR4252	0	0	0	0	1355.11	1308.96	9.54398e-06
CPB1	0	0	0	0	29.9393	28.9196	9.54398e-06
AC051649.1	0	0	0	0	258.702	249.892	9.54398e-06
RNU1-134P	0	0	0	0	517.405	499.784	9.54398e-06
NHP2P2	0	0	0	0	185.591	179.27	9.54398e-06
AC087164.2	0	0	0	0	27.2753	26.3464	9.54398e-06
TMEM88B	0	0	0	0	173.52	167.61	9.54398e-06
RN7SL625P	0	0	0	0	293.374	283.383	9.54398e-06
TBC1D3P1	0	0	0	0	50.4263	48.709	9.54398e-06
MUC16	0	0	0	0	5.84338	5.64438	9.54398e-06
NDUFA3P4	0	0	0	0	341.487	329.857	9.54398e-06
MIR936	0	0	0	0	871.141	841.473	9.54398e-06
PRAMEF12	0	0	0	0	47.8006	46.1726	9.54398e-06
AL358075.1	0	0	0	0	263.087	254.127	9.54398e-06
AL513211.1	0	0	0	0	176.753	170.734	9.54398e-06
FAM106DP	0	0	0	0	511.208	493.798	9.54398e-06
HPN	0	0	0	0	25.2579	24.3977	9.54398e-06
AC022001.1	0	0	0	0	318.552	307.703	9.54398e-06
HOXD1	0	0	0	0	345.81	334.033	9.54398e-06
LRRC14B	0	0	0	0	108.546	104.85	9.54398e-06
AC009305.1	0	0	0	0	231.989	224.088	9.54398e-06
SMTNL2	0	0	0	0	172.817	166.932	9.54398e-06
DLX6	0	0	0	0	74.2579	71.7289	9.54398e-06
AC008738.6	0	0	0	0	1200.31	1159.43	9.54398e-06
SPATA46	0	0	0	0	45.8003	44.2405	9.54398e-06
PRR13P4	0	0	0	0	202.783	195.877	9.54398e-06
HBZP1	0	0	0	0	199.002	192.225	9.54398e-06
TCN1	0	0	0	0	53.8284	51.9952	9.54398e-06
CABP4	0	0	0	0	22.5493	21.7814	9.54398e-06
AC005578.1	0	0	0	0	83.6978	80.8474	9.54398e-06
IGSF1	0	0	0	0	12.1078	11.6954	9.54398e-06
SVOP	0	0	0	0	11.743	11.3431	9.54398e-06
AL157788.1	0	0	0	0	372.803	360.106	9.54398e-06
AC005256.1	0	0	0	0	372.803	360.106	9.54398e-06
LYPD8	0	0	0	0	38.1635	36.8638	9.54398e-06
LINC01044	0	0	0	0	129.942	125.517	9.54398e-06
LINC00461	0	0	0	0	13.8276	13.3567	9.54398e-06
LINC00967	0	0	0	0	42.622	41.1704	9.54398e-06
C14orf144	0	0	0	0	57.9185	55.946	9.54398e-06
RAB5CP2	0	0	0	0	134.022	129.457	9.54398e-06
AP003717.1	0	0	0	0	181.385	175.208	9.54398e-06
AL109918.3	0	0	0	0	252.579	243.977	9.54398e-06
SOX14	0	0	0	0	41.5435	40.1286	9.54398e-06
AC010328.1	0	0	0	0	21.0275	20.3114	9.54398e-06
RNU6-727P	0	0	0	0	797.867	770.695	9.54398e-06
RNU6-46P	0	0	0	0	797.867	770.695	9.54398e-06
MARK2P17	0	0	0	0	101.512	98.0551	9.54398e-06
EIF4BP2	0	0	0	0	47.5874	45.9667	9.54398e-06
COX7A2P1	0	0	0	0	271.022	261.792	9.54398e-06
SLC6A20	0	0	0	0	12.8359	12.3988	9.54398e-06
SSTR5-AS1	0	0	0	0	42.4524	41.0066	9.54398e-06
MIR3680-2	0	0	0	0	2943.86	2843.6	9.54398e-06
AL049698.1	0	0	0	0	55.4723	53.5831	9.54398e-06
GAST	0	0	0	0	181.642	175.456	9.54398e-06
RN7SL502P	0	0	0	0	294.386	284.36	9.54398e-06
AC004080.4	0	0	0	0	404.606	390.826	9.54398e-06
EIF4E1B	0	0	0	0	51.8033	50.039	9.54398e-06
AL049637.2	0	0	0	0	458.988	443.357	9.54398e-06
VIPR1-AS1	0	0	0	0	16.4271	15.8677	9.54398e-06
C17orf47	0	0	0	0	40.2128	38.8433	9.54398e-06
AC074366.1	0	0	0	0	78.6112	75.934	9.54398e-06
AC021087.4	0	0	0	0	151.368	146.213	9.54398e-06
AC113410.2	0	0	0	0	125.917	121.629	9.54398e-06
SCGB3A1	0	0	0	0	302.737	292.427	9.54398e-06
MNX1-AS1	0	0	0	0	82.0094	79.2165	9.54398e-06
MIR5695	0	0	0	0	1004.37	970.169	9.54398e-06
SKP1P1	0	0	0	0	174.584	168.639	9.54398e-06
ADGRF4	0	0	0	0	50.352	48.6372	9.54398e-06
AC016772.1	0	0	0	0	135.403	130.792	9.54398e-06
MTCO2P20	0	0	0	0	126.853	122.532	9.54398e-06
MIR154	0	0	0	0	1016.33	981.718	9.54398e-06
AC004233.4	0	0	0	0	204.729	197.756	9.54398e-06
RN7SKP225	0	0	0	0	727.601	702.821	9.54398e-06
RNA5SP67	0	0	0	0	6516.93	6294.99	9.54398e-06
AC027544.3	0	0	0	0	112.776	108.936	9.54398e-06
AC068014.1	0	0	0	0	206.711	199.672	9.54398e-06
AC091588.1	0	0	0	0	1189.02	1148.53	9.54398e-06
RN7SL22P	0	0	0	0	317.367	306.559	9.54398e-06
C1orf143	0	0	0	0	85.1165	82.2177	9.54398e-06
CYTL1	0	0	0	0	85.1165	82.2177	9.54398e-06
KRT16P2	0	0	0	0	56.9145	54.9762	9.54398e-06
AL139254.3	0	0	0	0	126.664	122.351	9.54398e-06
AC104825.1	0	0	0	0	124.63	120.386	9.54398e-06
AL022345.1	0	0	0	0	1264.77	1221.69	9.54398e-06
AC010503.3	0	0	0	0	158.096	152.712	9.54398e-06
TRIM43CP	0	0	0	0	166.093	160.436	9.54398e-06
AC083899.2	0	0	0	0	62.0435	59.9305	9.54398e-06
SNORA30	0	0	0	0	330.898	319.629	9.54398e-06
PHBP13	0	0	0	0	224.663	217.011	9.54398e-06
PRSS37	0	0	0	0	38.7525	37.4327	9.54398e-06
AC087641.1	0	0	0	0	167.232	161.536	9.54398e-06
AC130366.1	0	0	0	0	71.6206	69.1815	9.54398e-06
MIR202HG	0	0	0	0	103.859	100.322	9.54398e-06
FNDC9	0	0	0	0	37.3618	36.0894	9.54398e-06
AC012645.3	0	0	0	0	105.267	101.682	9.54398e-06
UNC5A	0	0	0	0	58.796	56.7936	9.54398e-06
CPLX2	0	0	0	0	12.0259	11.6163	9.54398e-06
AP003467.1	0	0	0	0	283.627	273.968	9.54398e-06
TLX1	0	0	0	0	249.552	241.053	9.54398e-06
IL25	0	0	0	0	62.4519	60.325	9.54398e-06
AC092849.2	0	0	0	0	512.744	495.281	9.54398e-06
FAM83A	0	0	0	0	27.0292	26.1087	9.54398e-06
GPR151	0	0	0	0	55.2926	53.4095	9.54398e-06
PACSIN1	0	0	0	0	17.7599	17.1551	9.54398e-06
BSX	0	0	0	0	102.858	99.3546	9.54398e-06
MTND5P14	0	0	0	0	404.286	390.518	9.54398e-06
AL121985.1	0	0	0	0	20.7163	20.0108	9.54398e-06
OR2I1P	0	0	0	0	15.9127	15.3708	9.54398e-06
SPCS2P1	0	0	0	0	125.732	121.45	9.54398e-06
AP002812.2	0	0	0	0	291.869	281.929	9.54398e-06
AC005088.1	0	0	0	0	623.152	601.93	9.54398e-06
AC005828.3	0	0	0	0	144.453	139.534	9.54398e-06
RPS7P7	0	0	0	0	149.513	144.421	9.54398e-06
AC098679.4	0	0	0	0	149.513	144.421	9.54398e-06
S100A9	0	0	0	0	147.958	142.919	9.54398e-06
AC105105.5	0	0	0	0	65.9751	63.7282	9.54398e-06
SIX3-AS1	0	0	0	0	148.344	143.292	9.54398e-06
AL353691.2	0	0	0	0	1446.98	1397.7	9.54398e-06
MTCYBP28	0	0	0	0	75.4168	72.8484	9.54398e-06
AL031658.1	0	0	0	0	42.4102	40.9659	9.54398e-06
OR5S1P	0	0	0	0	89.7706	86.7133	9.54398e-06
AC007161.1	0	0	0	0	57.0667	55.1232	9.54398e-06
RNA5SP378	0	0	0	0	711.432	687.203	9.54398e-06
DRC7	0	0	0	0	16.5738	16.0094	9.54398e-06
AC027237.2	0	0	0	0	218.342	210.906	9.54398e-06
CD300E	0	0	0	0	22.7537	21.9788	9.54398e-06
AC128709.2	0	0	0	0	152.996	147.786	9.54398e-06
AL161773.1	0	0	0	0	98.9245	95.5554	9.54398e-06
CA1	0	0	0	0	62.9586	60.8144	9.54398e-06
AC008114.1	0	0	0	0	399.868	386.25	9.54398e-06
GIF	0	0	0	0	70.8774	68.4635	9.54398e-06
NKX1-1	0	0	0	0	690.71	667.187	9.54398e-06
LINC02525	0	0	0	0	170.176	164.381	9.54398e-06
AL354796.1	0	0	0	0	43.758	42.2677	9.54398e-06
CHRFAM7A	0	0	0	0	12.4867	12.0615	9.54398e-06
BX640514.1	0	0	0	0	44.5108	42.995	9.54398e-06
BCL2L11	1632.44	1224.98	4691.33	8630.75	142970	146350	1.16305e-05
AP003068.4	237.756	267.617	117.308	749.36	19905.9	19536.4	1.24031e-05
CA2	89.8163	101.097	576.096	391.962	20186.8	19460.5	1.29498e-05
AL390719.2	0	0	0	46.8386	2075.91	2005.21	1.67528e-05
MAP3K19	15.699	14.1366	0	0	84.3456	81.4731	1.78816e-05
EFNA2	100.464	0	99.1369	243.571	13404	13990.3	2.09725e-05
IFFO2	11386	12625.2	17606	23682.6	155085	156093	2.09751e-05
LINC00605	0	0	0	0	657.549	688.085	2.14428e-05
AP003119.3	409.38	573.436	1481.24	1632.16	8879.32	9186.75	2.39691e-05
AL031432.5	376.342	282.406	371.372	182.486	11008.5	11501.6	2.69376e-05
AC017104.3	0	0	0	162.781	12174.5	11614.7	2.72794e-05
HIST1H2BG	621.512	615.624	551.974	813.691	6233.14	6128.38	3.03918e-05
CDH23	5.27936	4.75395	5.20964	10.2397	132.367	136.992	3.49182e-05
AC015656.1	0	0	0	12.9205	310.183	299.619	3.87964e-05
GPR37L1	0	6.51575	71.4032	77.1899	764.562	726.007	3.96952e-05
LINC00482	0	19.5383	42.8224	21.0422	582.875	600.56	4.91446e-05
MFSD2A	5995.93	5120.67	13899.6	14098.5	39074.6	37435.1	5.88729e-05
AC012676.1	831.596	836.931	1448.14	1731.54	7271.28	7573.69	6.69777e-05
MPPED1	0	0	0	0	469.318	439.168	6.69838e-05
SHISA2	133.343	90.054	65.7908	48.4927	1820.87	1931.86	6.93758e-05
EIF3KP1	726.677	327.178	717.08	211.416	11192	11565.1	7.33638e-05
AC024940.1	0	6.08444	0	13.1055	254.119	245.464	7.43969e-05
AC005828.4	0	233.292	0	83.7495	6341.02	6722.64	8.0305e-05
AL445307.1	0	142.61	781.403	460.761	8934.26	9451.89	8.05375e-05
AC005156.1	0	0	0	80.6801	1340.92	1295.25	8.33571e-05
TMEM95	0	0	0	75.5388	1115.97	1145.34	8.85815e-05
NGFR	22.9735	10.3436	272.041	1169.67	35609.3	33263.9	9.16593e-05
AC090241.2	0	0	0	18.0691	283.627	273.968	9.53075e-05
BCORL1	4125.52	4842.3	5647.68	7857.2	36632.1	37282.2	0.000103752
MIR5587	5396.6	8909.12	26626.7	22678.7	85371.8	84020.3	0.000106247
H2AFX	77618.8	63511	76069.1	159627	1.21134e+06	1.24565e+06	0.000119571
KCNH2	0	0	0	31.4648	493.898	519.173	0.000121156
KRT8P36	198.625	59.6191	261.336	288.936	2193.58	2118.88	0.000125277
CDS1	42.7438	76.9796	0	41.4523	976.006	924.281	0.000125862
PPP1R36	184.947	222.054	182.504	328.824	2539.35	2426.21	0.000134163
LSMEM1	514.954	761.8	1306.68	2925.03	95351.6	103462	0.000137498
PCDH17	57.2544	46.4006	169.495	99.9441	1527.79	1634.23	0.000143821
PYGM	95.7037	77.5611	113.328	139.218	2296.69	2119.14	0.000144484
LINC00926	207.882	818.97	692.337	1096.21	12076.3	12766.4	0.000144695
AC087521.1	0	0	46.0053	406.912	6387.23	6008.4	0.00014519
RNF151	0	87.7827	0	0	1134.8	1180.47	0.000151001
ZNF703	22319.1	13958.2	26603.3	33474.8	143365	143876	0.000168336
DLEC1	68.6064	51.4821	45.1336	38.8112	276.45	286.815	0.00017119
CBX4	17445.9	9971.29	28060.9	50082.2	847108	776625	0.000192541
DLL1	1684.56	2062.46	6065.97	12324.1	360832	328912	0.000201166
MAFA-AS1	0	102.939	451.227	776.038	8598.6	7910.25	0.000207023
AL645608.8	0	41.156	1894.25	3856.17	129531	117727	0.000214421
AC008752.2	254.24	228.937	250.882	369.838	1593.61	1649.29	0.000223712
SCAF4	41086.2	36451.6	58192.7	67969.7	180769	173970	0.000226241
AC025594.3	482.734	326.018	595.449	643.705	3350.03	3131.56	0.00022748
ZAR1	0	0	0	221.649	2280.48	2315.78	0.00022825
AC010336.2	376.838	339.334	0	274.089	3036.94	3096.49	0.000229358
AP002847.1	127.403	76.4824	251.441	288.292	798.578	808.114	0.000229885
HIST3H2A	18641.9	10551.6	19867.4	30992	157008	160137	0.000239299
TMEM163	0	12.6178	27.6546	67.9449	439.155	436.319	0.000246874
PRMT1P1	0	42.5429	93.2417	91.6347	507.662	490.373	0.000248907
AL138713.1	0	20.1529	0	0	320.645	348.441	0.00025792
IL3RA	1338.11	1204.93	1540.51	1405.82	5641.53	5256.5	0.000265402
SEMA4D	148.127	121.259	132.883	166.505	1127.44	1228.81	0.000274114
FAM90A27P	0	0	0	0	865.464	776.275	0.000292596
NEXMIF	0	3.65108	16.0042	7.8642	123.443	133.267	0.000295098
AC006058.3	2675.58	2931.32	4048.38	5535.46	30986.2	28542.4	0.000306607
RNU6-190P	0	420.841	0	0	4184.89	4042.37	0.000309655
TNFRSF10D	107062	91541.8	173297	190420	922464	843080	0.000310941
RUNX3	716.684	721.282	1497.64	1257.19	9078.89	8259.2	0.0003185
HES4	4093.31	2188.52	3534.34	6492.01	68572.3	75309.6	0.000320047
ZIC2	86.4109	38.9055	1165.35	2332.44	71005.6	63529.9	0.000337654
SLC44A4	28.2992	50.9656	27.9255	27.4442	456.127	416.116	0.00033978
SP5	46.2816	0	0	44.8832	621.639	600.469	0.000349857
NKX6-2	35.6411	0	35.1704	69.1286	1021.27	924.834	0.00034997
IGFALS	121.041	108.995	39.8142	58.692	289.029	279.185	0.00036098
LDHD	161.662	54.5898	279.172	176.375	2605.67	2866.5	0.000362787
FGFR3	3037.31	1216.56	3113.97	3528.91	64956	58308.5	0.000366814
AC137767.1	764.078	860.044	1507.98	1873.07	4485.25	4405.93	0.00036939
RRAD	1394.68	602.819	14092.9	26942.5	974907	867926	0.000377249
SLC9A3P3	0	0	0	0	229.803	258.973	0.000387382
AC080078.3	0	0	0	0	1106.33	1246.76	0.000387382
CXADR	299.632	321.204	323.834	325.172	958.229	888.571	0.000396968
AC040169.3	311.569	350.701	1229.82	830.926	4882.37	4581.35	0.000417312
MNX1	0	0	22.3896	44.0073	772.044	686.876	0.000425387
AC098818.2	41.0948	18.5025	40.5521	59.7798	294.386	284.36	0.000447298
AC106818.1	0	0	0	14.2596	184.331	203.49	0.000448907
AC004870.1	108.095	97.3373	0	0	1161.52	1028.47	0.000471042
AXIN2	875.683	640.683	1314.18	1884.22	16352.3	14627.7	0.000475079
MEX3B	3124.11	1800.05	4052.98	5381.46	66102.5	58768.1	0.000483635
AVPR1A	31.9772	0	110.442	248.088	3121.09	3512.65	0.000490487
HSPA2	70007.3	36661.9	74587.2	76278.6	321109	321535	0.000495173
NEFM	10663.5	4879.48	9663.64	5814.33	68418.3	65128.2	0.000502689
IRX5	10053.4	5944.73	12566.2	17516.9	90443.1	82986.1	0.000506079
AC092620.3	0	46.5909	68.0759	83.6283	432.419	447.527	0.000508369
CYP2T1P	1978.89	700.049	1150.73	1353.65	11169.8	11186.8	0.000511666
HSPA6	160.844	162.94	39.6798	214.478	8173.51	7199.54	0.000513651
PGPEP1L	0	0	57.7538	28.3792	366.852	404.981	0.000516032
PHLDA2	99133.6	56994.6	112897	153405	568728	553850	0.00051884
AC010913.1	494.844	534.715	455.755	719.84	3249.45	3509.73	0.000520953
THSD1	4072.17	4974.67	4833.31	5564.69	13591.2	13571.6	0.000534131
AC138028.6	1608.3	1013.77	2285.37	3119.41	13249.3	12241.7	0.000534499
TUFT1	2015.96	1959.22	2935.48	4863.78	26945.6	24581.9	0.000539086
HAPLN3	1055.12	1132.83	1468.35	1561.11	3052.45	3276.11	0.000549081
NR3C2	158.732	64.9701	128.156	111.953	826.971	823.77	0.000549379
MISP3	607.519	492.351	599.496	746.274	8558.94	7566.82	0.000565002
ABHD17AP1	0	0	201.674	198.198	549.015	618.704	0.000568768
AMBRA1	20067	15938.4	24277.4	26094.2	60905.2	58207.6	0.000579557
IDI2-AS1	0	67.2817	73.7311	362.302	3880.54	3489.87	0.000592191
PHLPP1	8228.32	6043.04	12524.2	13491.7	45076.5	41132.9	0.000596703
IL6R	7372.49	7370.48	8587.27	10545.5	22477.4	22376.4	0.000612659
GPR3	9556.54	5987.28	9652.74	11169.5	38952.1	37664.6	0.000615789
HBM	0	0	0	0	932.007	810.239	0.000620363
MAP3K21	999.649	883.893	1319.22	1851.29	8778.76	7938.08	0.000633118
AP002383.4	61.629	27.7477	182.445	388.485	10098.9	8795.49	0.000652585
RPRM	0	0	0	125.71	1450.91	1625.74	0.000661151
AL157935.1	37.8333	119.238	74.6674	110.071	745.309	785.375	0.00066699
IRF7	4026.92	2842.12	4224.33	5418.1	19653.7	18325.4	0.000674136
FAM189A2	213.714	192.444	257.756	207.257	637.896	616.172	0.000674373
ATP1B2	58.2051	52.4124	201.028	56.4465	2658.1	2341.02	0.000687867
TMPRSS9	272.725	358.141	493.392	562.03	1221.05	1277.76	0.000698938
AL355497.1	0	0	0	0	3098.8	3591.91	0.000726586
AQP6	0	0	0	0	83.2246	96.4683	0.000726586
HBEGF	6444.45	6542.69	13872.1	14092.6	127322	111155	0.000736544
MATN1	124.195	139.793	347.237	190.7	1612.54	1772.46	0.000763508
PRLHR	0	0	0	8.30723	291.476	251.913	0.000764198
AC008897.3	0	533.239	194.784	382.855	6893.38	6146.41	0.000766569
HES6	608.454	863.994	2032.18	3721.98	39270.2	45098.3	0.000769281
ABTB2	5483.06	3202.38	9932.13	7632.13	33029.4	35751.7	0.000774668
AL583722.4	266.313	179.856	919.785	903.933	4530.91	5182.81	0.000794453
AC004449.1	660.554	396.543	2172.77	2028.56	7295.05	6475.26	0.00080043
C11orf96	2611.5	651.212	6779.53	6234.1	164520	141819	0.000808591
AC093525.8	2060.25	2718.84	5818.71	12091.4	59162.3	65197.2	0.000822922
PMAIP1	20774.3	13175.4	26182.7	26103.8	72346.4	70583.6	0.000833632
BRD2	89362.6	89613.4	129639	161095	638316	569664	0.000834727
WHRN	2546.07	1642.05	1969.21	1826.83	8549.5	8183.94	0.000837811
PNP	46391.6	54551.7	52529.8	66814.7	160967	164132	0.000850995
PTGER3	385.192	209.003	350.866	277.771	2741.66	3101.06	0.00085273
MAFA	0	34.2857	338.15	646.182	15683.3	13469.6	0.000860203
LINC01977	0	0	0	0	1241.42	1060.78	0.000875322
SOX3	0	0	44.128	1127.55	11132	9940.59	0.000876765
AC093585.1	0	0	219.815	108.013	1196.8	1348.72	0.00088123
PKD1L3	0	0	0	8.89204	164.208	190.339	0.000887227
HEY2	0	0	102.971	50.598	373.755	361.026	0.000937163
AC021016.2	2979.37	3311.65	3950.66	3589.12	8128.66	7610.23	0.000938511
PLK2	13557.2	5527.77	20363.1	21069	200860	174216	0.000948062
AC026803.2	1209.39	635.265	397.805	586.424	4873.23	4620.1	0.000953498
AL645940.1	1605.05	1806.64	1425.47	1790.04	5461.5	5969.64	0.000959569
RNU2-17P	0	0	990.325	243.314	6739.88	6076.32	0.00098308
CKB	7537.18	4326.35	8777.12	11431.9	135271	116482	0.000983629
SERTAD1	52676	47819.4	89586	130182	383729	417666	0.000990802
IRAK2	6350.53	5003.69	9562.05	12184.6	25932.6	26730.5	0.00100011
LINC00304	168.488	119.208	190.014	163.397	603.487	562.115	0.00100553
AL583810.1	0	123.232	0	0	1633.91	1420.44	0.00100903
EN2	168.495	25.2876	387.962	708.084	6890.1	8015.68	0.00101768
CDC42P4	0	152.489	167.106	0	1516.37	1611.2	0.00102156
PEAK3	185.198	550.33	475.156	790.252	3548.87	3748.38	0.00102218
FSTL3	67238.5	65319.4	63988.5	79978.8	168405	174151	0.00105679
CNNM4	10084.9	7786.34	11481.4	12379.2	66742.2	76713.6	0.00106119
PDCD1	0	0	0	0	323.072	273.061	0.00106776
NR2E1	0	0	0	0	182.956	154.634	0.00106776
TPSP2	0	0	0	0	1119.63	946.312	0.00106776
GATA5	0	0	0	17.8149	296.087	254.225	0.00107169
TRIM71	10.9775	0	140.823	393.897	9859.29	8365.12	0.0010868
MAF	478.34	461.501	485.509	1100.08	4797.27	5213.13	0.00109764
AL023803.3	0	164.466	360.463	797.064	5397.07	4739.33	0.00110072
TMEM210	0	0	82.5996	0	524.673	506.805	0.00111504
CLDN6	328.948	222.157	270.503	106.336	1570.96	1470.04	0.00112363
AL353807.1	144.018	194.528	0	0	1160.64	996.548	0.00112743
FBXW4P1	425.815	536.812	1386.63	1589.86	5261.86	6040.26	0.00113113
RPL7P19	154.272	0	608.938	299.221	2762.84	2535.31	0.00115209
MIR193A	4333.64	975.585	5345.51	17336.1	81491.3	86212.7	0.00115833
ONECUT2	52.8557	47.5954	57.953	116.756	557.436	502.893	0.00118516
HCG9	0	122.645	0	0	853.718	942.45	0.00119324
WNT7B	132.128	8.49847	167.636	54.9155	1081.73	1142.84	0.00119481
CRIP1	38.3662	51.8218	113.579	130.225	1820.81	2157.01	0.00124498
RND1	30.7648	0	30.3585	104.423	1157.02	1357.11	0.00125539
NT5DC3	16811.8	14218.4	17539	22017.7	142055	165912	0.00129352
LINC01311	1913.4	2851.81	3515.83	5502.78	19555.8	21743.2	0.00129806
POMT2	8488	10740	10942.3	12693.8	30709.3	28757	0.0013342
DYNLL1P1	0	159.575	0	0	952.102	919.677	0.00134137
AC226118.1	0	20.0027	0	0	119.345	115.281	0.00134137
PIM3	44164	22727.4	56272.7	68358.4	444169	382365	0.001351
AP003419.3	922.05	913.314	545.924	625.934	6770.3	7975.27	0.00136404
KL	0	0	18.6078	9.14354	151.967	179.412	0.00136672
LHX2	35.9096	32.3358	318.918	348.246	5820.07	4876.42	0.00137192
AL096828.1	0	0	347.162	0	2047.66	1977.93	0.00138781
LINC02029	0	28.6745	0	0	1254.63	1046.64	0.00139474
PRDM13	0	0	28.7182	84.6698	338.777	327.239	0.00142935
FAM46C	198.936	67.1764	229.027	273.311	1380.56	1577.3	0.00146365
IRX4	203.211	137.24	100.264	673.328	6065.49	5243.74	0.00146424
VGF	599.401	634.996	382.726	1384.84	9313.86	10735	0.00148401
ABCA17P	29.0052	45.7074	0	7.03221	116.877	112.896	0.00148711
FGF8	0	30.5957	0	65.9012	1521.24	1822.09	0.00149251
EXOC3L4	0	0	0	0	98.1285	118.483	0.00149457
LY6G6C	0	0	0	0	309.599	373.818	0.00149457
AC100827.5	0	0	0	0	801.613	967.891	0.00149457
RAB25	0	0	0	0	200.993	242.685	0.00149457
AL359853.1	0	0	0	0	568.198	686.059	0.00149457
KLF18	0	0	0	0	108.1	130.523	0.00149457
AP001011.1	0	0	0	0	325.536	393.062	0.00149457
TRPM5	0	0	0	0	150.834	124.883	0.00150174
SPATA2	11744.5	8987.26	15180.7	16294.1	48983.8	43414.5	0.00151059
AC025580.2	0	22.0925	24.2102	11.8965	153.783	148.546	0.00151681
RBM14	42136.6	44888.3	54627.6	67142.9	200928	178187	0.00151742
WFIKKN1	97.7245	35.1995	57.8603	151.635	1295.1	1115.75	0.00152151
NEUROD2	0	0	0	14.8125	670.173	554.871	0.00156618
AVPI1	15573.7	10429.5	22729.2	23194.2	70547.5	62654.8	0.00156844
CDKN1A	124849	110157	153830	179447	401919	365304	0.00158726
CTBP2P7	76.6399	103.519	75.6277	37.1622	411.761	464.028	0.00159247
AURKC	929.908	859.396	917.627	806.884	2761	2455.3	0.00160001
KCNG3	124.66	11.2254	246.027	193.43	1585.09	1358.59	0.00163862
AC011247.2	409.185	368.461	1211.34	3174.57	21617.8	25482.5	0.00164868
TCF3P1	0	0	0	71.6	396.668	383.159	0.00167165
NPBWR2	0	0	0	34.1936	189.434	182.983	0.00167165
AC018868.2	75.7268	34.0951	149.453	73.4388	542.474	523.999	0.00168583
SMG1P6	488.089	366.261	224.767	284.005	1019.8	1013.21	0.00169149
DNLZ	788.435	614.395	1047.34	1720.38	7657.39	6662.2	0.00173179
DRD4	64.5498	0	63.6973	281.698	1849.63	1619.14	0.00173984
GALR2	279.589	31.4705	68.9743	101.678	1376.96	1390.53	0.00174819
AC011481.3	68.173	53.7147	50.4545	74.3775	228.92	250.607	0.0017612
INA	9354	8343.35	9201.35	14508.5	104687	124730	0.00176641
SFN	361.136	162.598	285.094	245.158	4721.32	3935.8	0.00178477
AC015912.3	2739.66	2590.35	4866.25	4915.23	19871	23459.7	0.00178754
AC006449.6	2242.32	2093.94	2048.8	1852.41	6878.83	6033.98	0.0017951
CNTD2	233.791	147.366	92.2814	113.364	1004.87	1172.86	0.0018262
IGFBP7-AS1	0	74.0099	216.278	185.982	1422.86	1706.16	0.00186845
B3GNT4	325.254	320.341	361.078	443.569	3039.89	3639.68	0.0018858
PSPN	1706.42	1284.15	2525.82	2151.32	34140	28212	0.0018898
AC006116.4	843.717	664.779	416.287	613.669	3588.64	3101.54	0.00191141
AC078860.1	0	0	0	175.445	1457.96	1721.27	0.00191708
KRT8P11	0	0	0	0	3388.71	2756.47	0.00195401
TUBB2A	23628	19362.6	23370.4	43633.1	330958	397185	0.00196229
TPRN	7608.62	7100.68	11932	14151.2	46460.3	39965.4	0.00196562
NRARP	161.593	218.267	4943.23	13398.8	50354.9	56094.4	0.00201354
TMPRSS6	70.0686	178.77	161.334	237.831	1150.28	1010.1	0.00207115
AC108134.1	0	0	0	45.3084	306.792	269.403	0.00212538
SLC30A1	108472	70058.2	149663	140750	340941	375217	0.00215413
SLC34A1	0	0	0	10.2075	207.35	254.913	0.00215701
RIPK4	401.879	212.873	489.883	1260.91	7472.41	8894.62	0.00219635
RNA5SP440	0	360.721	790.596	776.97	2152.23	2078.93	0.00221715
FLNB-AS1	488.396	1215.21	558.042	997.136	4741.6	4802.45	0.00222718
TUBB4B	517257	443939	583248	790066	1.65523e+06	1.76523e+06	0.00223004
AC012170.3	963.03	1011.72	950.312	1556.56	4311.71	4720.18	0.00223237
OLIG2	0	0	56.1342	82.7501	1120.63	910.257	0.00224912
BHLHE23	0	0	0	0	1616.6	2007.7	0.0022493
AL049869.2	0	0	0	0	1383.34	1718.01	0.0022493
JAG1	10814.3	8460.41	13427.5	17459.4	39554.7	43928.2	0.00225158
AVP	0	0	0	149.369	827.513	932.553	0.00225655
GPR50	0	0	0	0	262.548	211.339	0.00225863
MNX1-AS2	0	0	0	0	1369.6	1102.46	0.00225863
AC025580.1	0	0	0	0	702.649	565.599	0.00225863
LINC00528	0	0	0	0	237.144	190.89	0.00225863
PCDH8	0	8.3351	310.558	565.529	13510.3	10920.5	0.00228124
CD81-AS1	61.8288	0	0	119.921	664.372	695.225	0.00231717
KCNQ2	0	0	0	7.23753	233.895	290.481	0.00235075
SP6	210.567	358.153	346.31	612.615	7940.1	9774.3	0.00235898
C9orf152	161.758	233.055	255.394	392.176	11297.9	14019.2	0.00237496
UBOX5	10202.1	7275.09	10126.9	8859.56	23478.1	23792.5	0.00239663
RPS15AP36	748.743	224.742	246.285	121.02	3352.3	3022.25	0.00239921
PDGFA	1929.31	2895.5	3920.98	4644.13	22705.5	27355.7	0.00241054
AC007569.1	110.99	349.802	219.047	376.726	3577.86	2976.01	0.00241714
MIR600HG	127.46	150.642	141.499	293.571	2710.67	3321.17	0.00243818
PPIF	125504	120831	240726	289411	586524	674919	0.00246815
DUX4L26	0	34.2038	0	36.8364	1632.61	2036.97	0.00251817
SLC7A5P1	1952.96	1998.41	3503.94	10933.3	45309.1	51904.9	0.00252808
CD24	123.139	69.3021	60.7561	59.709	1543.69	1251.48	0.00254799
AL033528.1	0	306.612	672.006	990.637	2439.19	2356.12	0.00256528
AC016876.2	0	94.2594	20.659	50.7573	862.341	724.324	0.0025708
RYR3	196.577	269.735	295.59	283.688	616.085	591.055	0.00258752
SNORD3B-1	0	0	0	0	1126.28	1414.3	0.00260115
AMN	184.688	73.9143	40.4997	298.513	3050.31	2520.43	0.00262623
SLC34A2	0	9.13508	0	0	127.177	157.944	0.00266828
AC002094.5	303.148	955.422	598.289	220.492	3800.33	3802.01	0.00268864
AC122718.2	322.64	145.265	159.189	0	2889.06	2372.07	0.00270564
AC103760.1	113.975	153.948	56.2348	110.531	663.379	788.661	0.00270872
ANXA2R	1358.58	1223.37	2681.27	3003.19	22076.4	17937.5	0.0027434
LAX1	29.8124	13.4227	29.4187	14.4558	213.563	257.862	0.00276876
MZB1	0	18.8851	0	20.3386	450.709	362.8	0.00279128
PPP1R27	131.594	0	64.9282	127.618	707.013	739.846	0.00279686
GATA6	290.008	293.788	381.57	632.802	9067.37	7274.42	0.00281475
STPG4	0	24.4174	0	131.484	607.024	633.259	0.00284516
NPAS4	55.6243	25.0442	54.8897	121.373	7496.18	5941.86	0.00284751
FAM90A28P	51.3132	0	50.6356	24.8814	1332.5	1065.2	0.00286234
RPL39P5	424.677	191.206	419.069	205.923	1711.24	1652.96	0.00286546
HIGD1B	0	149.567	1420.5	751.703	3371.24	3352.21	0.00289422
AC009812.4	475.38	380.505	469.101	819.585	2081.09	2192.96	0.00291621
AC073439.1	53.743	48.3943	0	26.0596	144.372	139.455	0.00292151
WBP1LP2	573.186	817.224	659.886	1158.06	4619.32	5453.55	0.00293989
ADCYAP1	0	0	49.4512	24.2995	291.678	238.399	0.00296063
CNTFR	361.307	0	44.567	240.894	5823.56	4687.69	0.00296807
HIST1H4C	0	197.36	0	106.275	1570.06	1895.73	0.00301959
AC138512.1	0	296.722	0	0	1376.96	1520.08	0.0030243
BEST2	0	0	0	17.4715	1129.26	1433.62	0.0030264
ZSCAN4	0	0	83.6646	0	1708.2	1356.68	0.00303628
RN7SL521P	0	578.125	316.771	155.656	3449.37	3054.23	0.00308784
RPSAP49	0	96.8979	212.372	260.89	578.139	558.449	0.00313494
ZNF296	3662.72	1747.55	8361.55	18741.1	448104	353452	0.00316873
ATF3	1722.73	966.892	3283.52	4577.2	102996	81239.6	0.00321319
CCNA1	2502.67	1162.57	1920.82	1675.83	7968.04	7490.51	0.00323115
C9	32.3077	0	31.881	31.3316	1012.54	1285.45	0.00323639
MADCAM1	323.674	178.115	248.422	313.895	933.905	995.42	0.00325303
GJB7	34.9359	15.7295	34.4745	0	187.699	181.307	0.0032549
FAM229A	469.16	950.553	727.515	1121.21	3330.85	3362.34	0.00328607
BICDL1	52.1554	31.3098	51.4666	67.4394	217.944	255.633	0.00330061
HMX1	0	0	0	21.5624	637.103	500.017	0.00332038
AL022068.1	156.838	243.228	171.963	211.249	577.364	587.847	0.00333757
GRIN2C	66.718	100.13	109.728	134.796	378.368	442.426	0.00335206
SLC10A4	426.101	695.445	735.828	1446.29	6486.35	7877.88	0.00341645
MUC5B	0	13.8485	10.1173	4.97147	509.532	399.064	0.00343705
LINC01043	0	0	54.5634	194.383	2797.45	3563.05	0.00344339
KLF5	11045	6781.23	13992.5	12682.6	30460.2	28872.1	0.00346907
JSRP1	97.7846	0	96.4932	592.689	2189.02	2283.63	0.0034777
ESRP2	17.1382	177.475	152.207	274.237	1089.59	1245.19	0.00347781
MSI1	154.272	13.8918	91.3407	149.611	1298.54	1601.25	0.00351809
HIST1H2APS5	0	0	0	0	694.08	893.922	0.00353471
AC022098.4	0	0	0	0	727.601	937.095	0.00353471
AC006369.1	0	0	0	0	467.364	601.93	0.00353471
F2	0	0	0	0	100.437	129.356	0.00353471
RNA5SP175	0	0	0	0	2152.23	2771.91	0.00353471
AL591368.1	0	0	0	0	135.87	174.991	0.00353471
PHOX2B	0	0	0	0	165.663	213.362	0.00353471
AL590434.1	0	0	0	0	135.798	174.898	0.00353471
AL499627.1	0	0	0	0	117.055	150.757	0.00353471
VSX2	0	0	0	0	85.5143	110.136	0.00353471
ADGRA1-AS1	0	0	0	0	47.2625	60.8705	0.00353471
AL034417.4	162.143	323.299	297.146	415.573	1908.21	2324.07	0.00361567
KLHL21	54971.4	32220.7	74040.5	61476.6	351359	289193	0.00362465
HAND1	109.712	24.6984	216.527	452.189	15866	12336.4	0.0036524
RASD1	7854.1	3757.23	52368.8	77278.7	1.98587e+06	1.54456e+06	0.00369019
NEFH	9501.24	7886.17	6988.3	6696.77	26403.7	22452.6	0.00369885
AC092117.1	762.72	567.941	810.543	1422.45	4570.68	5404.59	0.00370454
RNU7-113P	0	0	0	0	6884.82	5320.28	0.00373089
LINC01022	0	0	0	0	1083.4	837.201	0.00373089
FAM124A	85.3536	57.6442	252.679	241.426	3617.67	2830.02	0.00375269
AC079250.1	538.644	485.037	708.707	609.431	1607.76	1397.7	0.00377756
AC067930.5	0	0	0	354.704	1601.18	1476.34	0.00379506
FGF11	51.3962	46.2811	33.8116	66.4578	214.772	192.639	0.00379559
ITGB4	197.42	171.424	180.898	136.754	530.338	463.488	0.00381419
HRH1	2441.09	2383.9	3290.97	2859.14	6834.67	5977.4	0.00386131
AC016722.3	503.216	261.424	229.186	506.781	1941.06	2176.28	0.00386513
GADD45A	96445.9	72116.9	95081.3	127540	444313	538310	0.00387423
FOXO6	238.549	89.5032	196.165	192.784	747.626	756.554	0.00390688
HGD	0	0	0	15.4977	257.575	331.737	0.00390861
FAM46B	523.404	706.97	1589.2	2381.77	20045.1	15775.5	0.00393171
AC013476.2	0	0	0	201.437	929.976	1077.97	0.00393238
ZSWIM6	20485.7	18384.5	34991.7	38271.3	95940.5	80260.7	0.00393419
AC021739.2	98.9004	178.115	97.5943	143.868	531.36	598.807	0.00394536
SP9	0	33.6145	221.02	325.816	2941.55	3777.73	0.00396419
CSNK1G2-AS1	0	127.565	69.8967	446.498	2473.63	2083.05	0.00399358
GPBAR1	283.328	63.7827	174.742	291.941	7198.89	5575.23	0.0041388
CDKN1C	1290.37	780.166	1418.85	1644.68	26377.4	20504.5	0.0041647
AC109326.1	360.863	747.382	712.194	1469.83	15445.8	19851.4	0.00418148
FAM222A	1383.22	507.451	1617.73	1403.54	12546.6	10014.5	0.00420422
IL13	0	14.8686	0	16.0131	118.284	142.82	0.00422363
C2orf83	27.3494	0	0	0	171.429	141.935	0.0042289
WT1	0	0	0	11.2399	124.539	160.397	0.0042898
C1orf162	68.8873	356.681	271.91	467.642	5058.16	6494.66	0.004312
AL109613.1	48.7922	197.713	48.1478	94.6361	1004.89	844.057	0.00436384
UCKL1-AS1	1005.81	1215.55	1514.91	1296.28	4100.31	3479.89	0.00440269
AC079305.1	573.186	86.0235	1508.31	370.579	5303.66	5123.04	0.00440501
KLKP1	0	0	0	24.1787	625.107	819.468	0.00450343
MAPK8IP2	129.253	101.84	143.489	195.855	1142.92	908.352	0.00451
KCNJ5	0	7.02664	0	0	27.9495	26.9977	0.00452231
MTND1P3	0	45.0901	0	0	179.353	173.244	0.00452231
C1QTNF9	0	22.676	0	0	90.1974	87.1256	0.00452231
LINC00345	0	150.617	0	0	599.1	578.697	0.00452231
RBM24	1882.44	1346.1	2158.07	3087.35	18343.5	23369.7	0.0045301
CSPG5	305.717	196.637	172.388	243.537	1251.44	1548.8	0.00468673
AC136604.2	436.45	1288.21	526.394	1222.76	12071.9	15477.8	0.0046931
RTBDN	35.6411	0	0	17.2821	159.573	154.139	0.00472415
MIR6165	0	0	0	0	23375.6	17670.9	0.00472493
FAM177B	0	16.4909	0	35.5203	229.582	285.125	0.00472523
AC036108.2	0	0	146.887	90.2219	366.546	450.625	0.00475081
SLC18A2	346.691	333	364.92	448.288	1324.56	1619.3	0.00476073
ATP6V0C	254.579	544.452	1067.67	1635.63	9460.43	12166	0.00476429
KCNC1	0	17.8646	78.3083	134.678	2925.27	2225.06	0.00477549
MHENCR	7617.68	10342.9	7634.53	12062.4	83346.8	65889.1	0.00479377
AC073476.3	190.148	256.835	112.582	184.403	544.854	526.298	0.00485352
GRHL1	539.525	523.616	520.568	715.072	3489.16	4417.73	0.00486496
TOB1	36343.4	35263.5	44036.3	62660.4	202644	167578	0.00487657
SNHG9	12112.2	13789.2	17586.8	23240.7	46017.1	53429.7	0.00489484
LINC00958	0	0	0	0	237.97	316.065	0.00492341
RPL23AP37	173.661	78.189	171.368	252.621	622.017	600.833	0.00499749
JUNB	97225.8	43680.5	178650	201480	1.4599e+06	1.13289e+06	0.00501574
RPS6KL1	137.684	473.384	234.677	430.919	4729.8	6127.72	0.00502874
ARX	0	0	0	0	248.094	186.39	0.00503188
RASSF5	205.003	166.14	215.782	258.452	954.559	1193.94	0.00508084
AC007938.3	1989.44	1998.15	1359.11	816.255	13018.2	10192.2	0.00508487
AC139530.1	1928.98	1693.58	2855.26	3507.57	10061.5	8258.95	0.00509959
MAP3K8	4712.72	3027.81	7707.27	5481.84	21668.9	18411.9	0.00513745
AC015802.6	33.7248	22.7763	66.5588	65.4117	392.583	306.288	0.00513898
TCHH	27.2595	79.7762	40.3492	72.6986	561.416	447.984	0.00519325
KCNG2	44.0981	19.8546	43.5157	149.68	592.311	724.71	0.00519818
RNF19B	12164.1	10476.5	16509.2	21148.8	88544.6	70552.8	0.00523446
TRIM54	68.987	31.0606	34.0379	50.177	494.193	387.857	0.00527678
CU639417.1	495.943	482.312	1468.18	1500.59	14850.4	11341.8	0.00529338
MAFF	45131.6	30724.6	68780.4	62613.9	235012	190630	0.00529888
BTF3P10	577.818	173.437	190.062	280.18	2069.62	1832.54	0.00530627
HRAT92	0	36.7305	80.5028	158.231	1923.67	1458.3	0.00541693
TLX2	34.3568	0	0	49.9781	492.234	386.319	0.00544347
KDM4E	0	0	80.4454	39.5295	693.486	916.662	0.00545821
KCNA1	0	0	11.7645	23.1235	757.959	567.155	0.00546792
GNRH2	231.689	208.631	114.315	56.1722	2904.51	2204.39	0.00547097
OTX1	19.7269	44.409	19.4664	66.958	1625.12	2166.97	0.00550723
C1QL4	138.107	145.089	136.283	178.579	3586.36	2707.67	0.00553486
FZD10	145.247	13.0791	0	239.459	2705.26	2085.48	0.00561993
UNCX	0	0	137.814	428.889	12297.2	9180.6	0.0056346
AL049637.1	0	0	0	91.908	339.451	327.89	0.00565866
PTF1A	0	0	0	85.1376	314.445	303.736	0.00565866
ZSCAN10	0	0	0	13.9288	51.4443	49.6923	0.00565866
KLF1	0	0	0	29.0388	107.251	103.598	0.00565866
PSPC1-AS2	1014.26	2397.45	2251.94	4549.2	11579.7	11404.6	0.00570991
GUCA2A	0	0	0	81.2473	5701.46	7681.21	0.00573035
AC092384.3	0	0	0	16.0911	267.437	200.923	0.00574049
AL160270.2	0	0	0	195.475	3248.82	2440.81	0.00574049
GCSAM	529.247	487.922	323.302	806.545	2143.89	2223.46	0.00580262
CLEC20A	0	0	0	64.2079	1185.72	887.637	0.0058222
PABPN1L	0	0	0	0	324.855	439.308	0.00587358
MSLNL	0	0	0	0	181.18	245.013	0.00587358
ADAMTSL4-AS1	109.085	605.741	538.22	581.839	2148.95	2358.82	0.00589359
FGF22	171.598	77.2602	270.931	515.882	4087.28	3116.9	0.00589682
FOXH1	0	51.4492	112.762	277.046	682.156	658.924	0.00589835
AC010525.1	216.19	292.012	426.671	1572.44	11228	14772.5	0.00593955
AC093627.3	0	523.485	1311.23	805.396	5503.06	7039.64	0.00594179
FOXCUT	0	0	282.525	0	1025.49	990.563	0.0059641
JMJD6	15541.3	17015	27393.6	32792.2	109286	139481	0.005977
BMP8A	112.695	482.027	111.207	191.258	1866.88	1608.35	0.00598589
BHMG1	0	15.615	0	0	93.1668	119.992	0.00599359
PP14571	265.243	265.383	465.315	328.681	1398.67	1147.11	0.00600138
AC012186.3	196.577	531.04	0	0	2112.29	1700.3	0.0060562
AP001273.1	695.692	1634.23	1104.38	1584.01	7285.86	9104.57	0.00605944
BARHL2	0	0	0	140.161	3709.94	2750.2	0.006102
CITED1	216.682	97.5585	267.275	131.334	1600.72	1265.08	0.00611301
LINC01971	0	81.9194	89.7718	0	3502.85	2596.68	0.00613408
MKNK2	29363.5	28060.8	26777.3	40447.7	133527	109616	0.00616893
AC009107.1	0	0	0	1120.72	3880.54	3998.27	0.00620562
AL121782.1	230.847	0	0	0	826.846	798.686	0.00620876
CXCR4	0	19.3011	42.3026	145.507	806.119	630.348	0.00621149
DAGLB	10418.5	12193.1	11964.4	18111.2	37020.2	42077.4	0.00630037
SMAD7	31633.7	23509.2	48314.6	45465.9	118808	98010.2	0.00635809
PCDH19	302.946	180.397	347.162	459.644	8549.43	11546.4	0.00640279
RTL1	113.689	81.8998	89.7504	77.1782	488.653	629.349	0.00642841
MYO1G	33.0544	19.8432	10.8726	37.3984	276.252	362.146	0.0064356
FOXJ1	108.3	65.0144	106.87	0	452.558	437.145	0.00645467
POU3F2	39.0818	17.5961	96.4141	66.3267	3604.55	2653.6	0.00645894
AZU1	0	0	105.531	207.424	33277.3	24327.7	0.00658397
AC245100.8	90.1134	202.863	355.693	393.258	726.225	857.38	0.00662454
AC104806.2	41.706	0	82.3105	80.8919	336.109	432.884	0.00663119
IDI2	0	0	69.228	102.052	2889.7	3944.21	0.00664634
AXDND1	15.6577	21.1492	15.451	15.1847	84.124	108.345	0.00665475
NAT16	24.6293	77.6234	72.9121	47.7703	1786.39	1320.79	0.00668896
GNLY	62.4975	0	61.6722	30.3046	279.816	324.344	0.0067508
AL365277.1	467.506	1403.26	1014.93	1103.23	5135.15	6281.2	0.00676647
CNTN2	0	2.41359	0	12.9968	91.2041	120.555	0.00680681
AL731571.1	755.273	1629.09	1195.94	1975.92	5190.25	5727.53	0.00682772
AC011912.1	409.606	405.725	598.212	548.179	1628.5	1317.96	0.00690343
EVPL	25.3901	22.8632	0	80.0248	443.342	570.991	0.0069219
P2RX2	0	0	47.7811	0	563.653	418.813	0.00697863
AC007285.1	600.252	1035.98	987.208	1455.29	3852.03	4672.69	0.00704754
FCER1G	494.502	400.759	195.189	479.561	1682.64	1454.25	0.00705969
NEUROG1	0	0	0	0	204.729	148.317	0.00708373
AC092811.2	0	0	0	0	610.889	442.564	0.00708373
HIST1H2BPS3	0	0	0	0	1001.43	725.493	0.00708373
AC091614.1	0	0	0	0	388.495	281.448	0.00708373
PLEKHS1	0	0	0	0	63.215	45.7966	0.00708373
CHAT	0	0	0	0	91.0633	65.9715	0.00708373
RPS2P52	0	0	0	0	416.448	301.699	0.00708373
AL512288.2	0	233.928	256.351	251.933	930.483	898.794	0.00708713
ID4	17489.8	8533.87	20068.4	12070.2	66942.6	57485.8	0.00711843
ELOVL2-AS1	0	54.0967	0	0	484.15	363.737	0.00718322
AC110285.7	434.492	251.518	245.002	601.949	2056.48	2523.32	0.00727922
RASGEF1B	65.5386	29.508	64.6731	54.4787	737.771	550.68	0.00730368
FAM84B	1676.04	953.199	1532.04	1437.19	4455.01	3921.79	0.00733347
AC009093.6	0	77.6234	0	167.196	926.276	1192.97	0.00740204
RPS2	563585	289273	632171	639284	1.34656e+06	1.37124e+06	0.00744435
CALY	95.0233	114.088	31.2561	76.7936	226.902	246.571	0.00744974
GPRC5B	128.703	141.648	338.674	235.76	729.892	902.939	0.00748552
PEG3	1192.01	916.07	1166.12	1170.94	10885.4	8159.33	0.00748584
MIR765	0	1129.62	0	2027.62	8986.51	10850.6	0.00748924
KLF3-AS1	39.4783	186.634	136.349	181.856	600.961	631.714	0.00749873
AL024508.2	151.014	113.32	347.712	317.311	721.198	914.335	0.00750977
LHX1	19.5289	0	269.794	464.002	13115.3	9493.03	0.00751719
SLC22A1	41.237	74.266	40.6924	79.9822	221.553	214.008	0.0075563
MARK2P8	0	180.36	98.8245	194.243	807.086	952.844	0.00767529
SLC17A7	47.5669	107.082	78.2312	84.5713	326.551	397.716	0.0076918
MIR194-2HG	0	0	0	38.0283	234.088	180.892	0.00771383
GPR25	0	0	0	0	1883.2	2627.54	0.00777367
AC006023.2	570.898	514.081	0	830.474	3067.25	2962.79	0.0078044
OPRL1	322.367	217.713	530.183	208.418	2092.8	1696.22	0.00780755
LINC01551	0	46.4564	33.9397	50.0322	184.787	178.494	0.00781403
HIST3H2BB	80.6599	272.372	79.5947	117.334	902.832	1116.27	0.00782791
AC243829.1	0	0	67.1527	0	243.745	294.305	0.00784372
GDF9	87.2278	157.093	229.536	352.468	3592.96	4929.25	0.00785375
STPG3	177.542	53.2908	116.798	286.963	12029.4	8650.82	0.00794072
AL118558.1	615.097	138.47	606.973	1043.9	2478.54	2593.64	0.007961
SLC35E4	20081.6	12394.2	15410.8	15487.9	47385.9	41701.8	0.00797932
NKX3-1	3089.59	2690.24	3940.41	4932.49	12240.7	9958.24	0.00801776
AC120024.1	191.638	0	0	278.772	1115.41	1160.3	0.0080636
SLC18A3	0	0	155.506	305.651	14993	10734	0.00806365
RDH10	6844.56	7179.84	6754.16	7376.25	57021.5	42712.2	0.00808202
PAQR9	0	0	22.5668	11.0889	102.389	138.463	0.0081253
ZNF385C	0	0	0	8.89375	131.392	95.1878	0.00814765
CLDN3	823.187	33.6937	0	36.2871	4489.73	3495.35	0.0081508
AC106820.4	729.989	687.913	854.367	1210.07	4818.89	3729.69	0.00816662
AC006023.1	0	0	0	0	3625.83	5094.32	0.00824217
PYCARD-AS1	0	117.605	171.837	253.314	4911.8	3539.57	0.00826658
RAX	0	11.5237	0	0	206.267	287.795	0.00826812
KISS1R	113.5	0	56.0005	0	762.248	589.031	0.00836245
AC095055.1	2227.17	1079.89	2197.76	2284.49	12502.8	9631.95	0.00836889
DUSP9	103.033	355.653	203.345	766.054	6458.24	4782.69	0.00839217
AC012213.2	0	9.33777	0	10.0565	92.856	125.571	0.00846404
NTNG2	121.53	43.7739	107.932	70.7147	359.117	336.375	0.00850579
AL138688.2	0	0	0	30.555	1072.08	763.054	0.00855823
ARMC5	5656.78	3700.36	9128.14	9804.54	28267.4	22248.3	0.00855936
FAM71A	0	0	0	0	555.565	393.539	0.00857185
SULT2B1	0	0	0	0	393.279	555.217	0.00857429
CASKIN1	80.9475	58.3131	47.9271	31.4007	246.446	196.044	0.00861594
SLC22A18AS	107.003	72.2656	52.7951	207.541	1485.14	1110.63	0.00862782
RNU1-88P	0	670.715	0	722.339	5335.74	7086.78	0.00866586
LGR5	72.6262	65.3982	89.5838	132.06	1138.07	1570.45	0.00872427
AL121832.3	566.886	638.085	813.673	962.078	8168.01	5995.38	0.00872907
AC114341.1	273.181	860.975	808.718	1324.63	28375.7	20320.7	0.00874848
AC083829.1	290.228	326.68	286.395	422.189	779.651	878.616	0.00878279
SOX11	1323.1	1619.75	1996.21	2799.55	4836.98	5636.97	0.00881999
FRG2	0	0	0	0	608.929	862.68	0.00882184
Z95331.1	45.3764	143.012	166.897	322.04	1628.98	1230.97	0.00888771
GADD45G	360.59	97.4109	1423.31	1783.45	69356.5	49154.2	0.00892805
GTF2F1	136439	106273	133857	122906	296186	254761	0.00902891
Z98885.1	0	738.508	202.324	795.35	3121.12	3369.51	0.00905603
AC009292.1	0	0	47.3721	23.2778	343.894	249.137	0.00909412
PRDX3P2	0	562.039	153.979	302.65	2375.32	2024.49	0.00912704
KRT16	0	0	0	37.3574	655.38	466.465	0.00912741
SCNN1D	710.609	810.523	818.095	999.251	2481.62	2028.32	0.00915862
EOMES	0	0	0	0	256.863	180.447	0.00916516
MMRN2	714.961	362.141	335.121	338.013	1776.58	1530.55	0.00921384
LINC00685	4232.38	6218.22	5715.19	3780.47	13962.7	12909.1	0.00924992
FOXI3	68.0029	15.3088	33.5524	65.9482	2283.48	1617.52	0.00928932
ADAP1	207.179	76.32	204.443	82.1943	792.666	684.216	0.00930448
CCDC163	657.04	794.056	341.244	771.334	2198.55	2632.16	0.00932115
ODF3B	538.644	242.518	327.096	642.917	1743.8	2006.95	0.00934511
DUSP4	7935.15	7092.18	12938.2	11250.1	35433.4	27851.7	0.00935565
AC023302.1	0	436.237	191.221	563.777	2949.84	2346.55	0.0094776
CRB2	0	13.5221	14.8182	72.8142	188.251	194.828	0.00949748
AC010331.1	327.629	590.045	808.255	1906.38	4107.23	4675.81	0.00952206
HSPA1A	22615.9	21160.3	22355.1	32843	114563	151511	0.00955186
AP000356.2	20.574	37.0529	81.2092	89.7858	663.225	480.478	0.00960756
AL139125.2	0	0	50.3376	0	319.745	441.222	0.00972555
EPHA2	20264.6	22376.3	29113.3	51109.5	118461	148293	0.00975437
ALDH1A3	115.624	208.233	114.097	168.195	1035.35	785.783	0.0098022
NPC1L1	127.072	8.17322	179.133	26.4069	731.48	910.688	0.00983108
AL391825.1	69.8974	31.4705	137.949	169.464	1126.61	1571.9	0.00984964
AL031770.1	112.033	0	0	108.648	501.597	484.514	0.00986168
AL353719.1	331.042	99.3652	108.89	588.573	1778.58	2004.34	0.00986307
MIR3176	14830.7	8585.15	17770.8	23628.5	84423.2	65055.2	0.00986815
RHOV	111.836	75.5292	220.718	216.914	2503.57	1789.55	0.00987411
ELL3	33.1042	59.6191	0	96.3119	1363.58	973.537	0.00990462
AL034550.1	483.469	696.564	381.667	656.406	1558.51	1505.43	0.00990891
AL034405.1	0	163.216	0	0	811.519	627.105	0.0100575
KDM4F	0	0	0	24.1157	801.613	559.226	0.0100692
NKX2-4	0	0	84.0759	82.6268	991.808	700.099	0.0100772
BMP8B	79.0875	124.629	78.043	86.2853	566.549	427.542	0.0100892
AC009086.3	378.333	127.755	186.668	1008.98	9316.37	6708.41	0.0101097
NXF1	50579.1	58165.3	79924.7	85525.7	280360	215480	0.0101475
AL022326.1	0	47.5895	0	25.6262	1041.12	731.391	0.010155
SMIM24	127.29	28.6554	251.217	30.861	854.858	770.695	0.010174
RNU6-767P	891.028	0	879.261	0	3989.34	4624.17	0.010236
AC000068.1	363.72	388.931	269.187	264.548	1221.34	943.798	0.0102551
AL132857.3	0	24.7126	0	0	196.596	142.425	0.0102788
AL031710.1	0	275.165	0	98.7815	912.092	881.029	0.010335
SYT6	0	8.41022	92.1639	217.381	4382.33	6301.15	0.0104042
AC012615.1	1027.53	1652.26	1810.64	3879.17	14261.5	19171.8	0.0104111
AC133528.1	236.87	213.296	233.741	229.713	636.312	512.201	0.0104124
AL031710.2	396.15	416.178	3127.34	3713.74	44459.6	31295.3	0.010415
LINC01988	0	0	0	0	172.468	249.892	0.0105117
LINC00570	0	0	0	0	103.481	149.935	0.0105117
C8orf89	0	0	0	0	518.978	751.954	0.0105117
DNAJB5-AS1	0	0	0	0	227.962	330.298	0.0105117
WFIKKN2	0	0	0	0	171.991	249.2	0.0105117
FPR3	0	0	0	0	61.5958	89.2471	0.0105117
CYP2AB1P	0	0	0	0	186.503	270.227	0.0105117
AC009365.1	0	0	0	0	227.355	329.418	0.0105117
GCM1	0	0	0	0	61.7518	89.4731	0.0105117
KRT8P9	0	0	0	0	117.835	170.734	0.0105117
AC005696.4	0	0	0	0	54.256	78.6123	0.0105117
PGM5P4	0	0	0	0	383.694	555.939	0.0105117
AC025183.1	0	0	0	0	401.75	582.101	0.0105117
FOXD4L6	0	0	0	0	83.9447	121.629	0.0105117
KRT13	0	0	0	0	58.6144	84.9272	0.0105117
SNORA70H	0	0	0	0	1264.77	1832.54	0.0105117
AC093879.1	0	0	0	0	145.19	210.368	0.0105117
AL132639.1	0	0	0	0	359.46	520.827	0.0105117
AC020922.4	0	0	0	0	503.668	729.773	0.0105117
UTF1	0	0	0	0	590.298	855.291	0.0105117
AP002383.6	0	0	0	0	244.969	354.94	0.0105117
AC099521.3	0	0	0	0	116.231	168.409	0.0105117
MSH4	58.3833	78.8593	28.8062	113.239	313.675	302.992	0.0105416
ZNF503	26320.3	11170.7	23358.6	23536.1	103303	81799.1	0.0105872
AP001033.2	2946.7	3295.4	2532.59	3595.13	6894.43	8057.33	0.0106277
TRIM36	764.217	393.234	1446.69	983.128	4259.51	3345.52	0.0106683
AC005070.3	1044.92	1930.52	1173.34	1956.81	7098.18	5734.48	0.0107139
KIF1A	0	0	7.61357	0	34.5439	46.7144	0.0107379
AC012555.1	0	0	0	68.5901	506.658	367.052	0.0107638
CABLES1	2378.49	987.021	2884.36	1966.19	9224.88	7559.85	0.0107766
P2RX1	0	21.6251	0	0	64.5127	62.3156	0.0107842
ZNF580	21497.5	16982.1	21947.5	23836.1	55529.7	70272.4	0.0108116
ESX1	255.09	28.7129	62.9304	154.614	1484.73	2040.92	0.0108666
AL158196.1	219.677	296.722	433.552	106.52	1180.26	1330.07	0.0108887
HORMAD2-AS1	0	0	65.3794	0	474.617	343.84	0.010889
LRRC25	39.4783	53.3239	38.9569	38.2855	176.753	136.587	0.010921
PRKCG	140.994	50.7847	83.4791	13.6734	782.764	585.372	0.0109392
TRIM9	181.194	148.764	157.766	118.869	534.469	700.647	0.0109924
FZD9	448.563	532.441	965.758	1344.58	3980.12	3033.33	0.0110218
NPTX1	6258.33	7684.75	4884.4	7869.33	27001.1	21357.3	0.0110888
HDAC2-AS2	153.717	149.066	93.3458	189.208	974.105	1339.8	0.0111345
AC009806.1	1102.2	744.377	362.547	445.373	5921.74	4290.05	0.0111762
AC139100.2	864.109	518.74	426.348	768.168	1934.41	2117.66	0.0112295
AC069281.2	368.275	399.899	384.789	955.897	2715.76	3503.94	0.0112416
AC046143.2	2383.5	1341.43	2352.02	2600.42	5335.74	6184.83	0.0113453
AC017104.2	0	0	0	0	4521.25	3082.78	0.0114986
CCDC116	64.6592	232.897	159.513	266.499	897.432	1146.5	0.0115118
AC093620.1	327.067	1104.44	161.374	1427.33	7321.77	9901.38	0.0115452
RASSF10	0	0	0	73.0905	877.339	1271.19	0.0115698
ALKBH5	131474	97343.2	140060	124501	293422	250857	0.0115764
DDN	406.893	251.898	702.658	727.542	5305.85	7544.75	0.0116078
LINC01140	42.5815	31.9531	56.0255	27.53	139.808	171.877	0.0116206
ART3	116.339	13.0951	0	98.7212	468.79	427.667	0.0116224
HUNK	885.119	564.131	1088.95	691.161	5084.84	3798.09	0.0117028
TLX3	0	0	63.0147	0	6004.05	4087.32	0.0117531
AC027243.2	1580.22	1897.27	1169.51	1404.77	16036.7	11390.1	0.0118203
AC003102.1	568.628	853.395	935.198	1539.46	4752.31	3688.76	0.0119159
AL035071.1	894.791	1692.05	1545.2	3037.15	11698.1	16020.8	0.011967
TPSD1	0	0	0	0	557.257	376.795	0.0122093
SERPINB9P1	65.3014	88.2036	128.878	63.3284	1520.32	2202.81	0.0122124
NPTX2	238224	277409	254199	302149	533008	639892	0.0122897
CYP26A1	64.1588	14.4434	189.935	139.996	2412.93	1664.83	0.0122958
COCH	78.9892	189.675	51.964	153.205	895.921	1229.79	0.0122992
AC005540.1	414.973	326.964	409.492	251.522	836.068	807.594	0.012309
HIST1H3C	0	313.327	915.629	562.405	3531.19	2608.36	0.0123748
AC009088.1	343.361	515.315	1355.31	1720.43	61492.3	41776.7	0.0124668
SERHL	218.921	246.416	270.037	212.306	784.127	615.406	0.0125146
AC127496.1	181.298	20.4068	89.4518	197.798	608.784	646.856	0.0125285
FAM83E	0	0	37.2008	91.3992	1856.64	2739.03	0.0125411
MSANTD1	12.6228	22.7331	24.9122	18.3621	248.667	174.689	0.012559
MAFB	899.169	215.072	1996.41	2411.63	39830.1	27269.4	0.0126136
AP001363.1	0	975.585	2850.94	175.113	9054.59	8121.49	0.012747
HOOK1	0	0	0	6.84074	50.5308	73.2149	0.0128414
SLC43A2	350.581	271.17	2270.86	1002.53	4684.74	4066.46	0.0128672
PYDC1	0	0	109.269	107.386	5255.17	3543.76	0.0128804
DNAJC19P5	603.418	1765.93	1190.9	1024.08	7564.59	5741.19	0.0128864
AC092171.3	863.131	194.307	709.777	680.105	2737.31	2364.12	0.0129238
AC110285.2	731.042	1481.14	841.618	1654.23	5400.52	4426.2	0.0129261
LMX1A	22.7814	0	0	0	163.196	236.457	0.0129672
AL031590.1	0	0	41.6195	0	113.3	127.682	0.0129717
TBR1	9.93125	0	19.6002	38.5248	747.003	506.812	0.0130095
CCDC17	172.146	206.684	198.184	431.273	2723.27	1935.67	0.0130137
GJB3	39.9413	35.9663	0	77.4692	286.123	241.831	0.0130784
RPL12P14	583.714	87.6036	960.009	849.117	4355.7	3197.6	0.0130786
GATM	444.843	232.59	311.526	354.864	2004.52	1489.42	0.013091
SIX2	4107.62	817.633	5120.05	4759.25	104692	71431.7	0.0130965
GLRA1	0	0	38.6528	18.9933	140.299	101.641	0.0131153
AC015909.3	0	0	0	0	618.636	413.701	0.0131859
CELF3	0	19.3403	0	10.4144	96.1611	74.3089	0.0132567
SLC2A3P4	0	58.3627	191.871	0	638.402	560.601	0.0133079
AL137060.1	108.014	16.2106	0	314.25	2160.09	3114.21	0.013361
GATA6-AS1	0	47.0935	51.6077	50.7183	515.134	361.884	0.0133672
CXorf36	14.1875	12.7755	70.0007	6.87942	749.544	515.402	0.0134271
LINC00115	434.351	977.807	1214.41	2000.83	6287.82	8640.91	0.0134307
HLA-DOB	307.879	254.135	151.907	124.407	689.223	532.601	0.0134373
NTRK1	0	9.8544	43.196	31.8387	215.585	151.45	0.0134567
LYPD1	0	0	0	38.3331	106.184	102.568	0.0134762
AC083862.1	0	0	0	74.444	206.212	199.189	0.0134762
ICAM5	5052.58	4099.16	6985.01	9918.2	61111	43005.6	0.0136744
YJEFN3	708.848	3104.46	1907.69	3077.82	13098.6	10339.4	0.0137053
HSPA1B	20724.4	22305.7	22167.4	38216.1	131393	181742	0.013831
LEF1	6971.33	5412.76	6475.63	6760.7	17899.3	14305.5	0.0139212
BARX2	78.1475	0	0	0	279.908	225.312	0.0139257
LGMN	18877.3	12815	15828.9	13753.9	40748.1	51437.1	0.013928
LINC01556	204.592	0	403.781	198.411	916.006	884.811	0.0139645
AC007292.3	0	0	263.532	388.485	1434.82	2078.93	0.0139818
CHST13	0	23.9943	0	25.8411	334.043	230.476	0.0139975
KLHL14	0	0	18.8463	27.7823	615.662	925.081	0.0142271
RPS6KA1	1199.04	1429.89	1439.03	1587.08	3090.45	3896.17	0.0142312
NUP210L	16.1895	65.6023	15.9757	15.7004	144.968	154.034	0.0142653
KCNQ1DN	0	0	0	0	1484.05	980.82	0.0142739
AC020978.5	178.874	0	176.512	433.675	961.033	928.304	0.0143247
AC008406.3	69.3886	93.7243	0	100.938	559.204	420.124	0.0143271
AC055811.1	154.898	34.8706	229.279	187.773	1525.73	1071.84	0.0143801
TMEM151B	0	141.539	17.2341	59.2797	422.246	407.865	0.0144619
AC079779.2	0	0	102.04	0	555.565	804.966	0.0145022
DIO3	1723.56	367.585	1208.46	1583.51	54261.1	36210.6	0.0145731
DSCR9	200.61	225.806	346.431	145.912	763.451	910.969	0.0145797
STX11	2821.59	1404.11	2930.87	2184.27	8776.54	7107.52	0.0146051
GFI1	115.529	104.031	114.003	98.0333	853.459	599.559	0.014606
ESAM	163.253	176.407	257.756	205.817	2485.14	3671.36	0.0146998
AC016586.1	1115.09	1192.38	2338.27	4933.87	24463.3	17240.4	0.0147473
FAM102A	19521.3	12399.2	18291.8	14255.4	51251.1	41651.3	0.0150334
AC108025.2	0	35.8013	0	38.5569	284.81	206.333	0.0150698
TRPM2	0	0	14.0315	13.7896	203.721	307.473	0.0151246
LINC00880	94.4896	0	46.6209	91.6347	676.882	980.745	0.0151375
NPIPB13	91.6378	24.7553	0	35.5477	213.347	237.786	0.0151544
AL020997.2	518.152	0	511.309	753.745	10671.5	7170.81	0.0152708
AC092620.1	0	126.252	0	0	2008.75	1333.98	0.0152899
ZNF48	9803.93	7452.39	15127.3	16064.3	43187.6	32421.9	0.0153559
DMRTA2	0	0	0	114.678	4950.24	3247.43	0.0153805
HMGB1P44	0	75.045	0	80.8212	3283.53	2162.53	0.0154206
GAREM1	3351.01	1996.55	2125.77	3097.05	6779.66	6526.97	0.0154836
KMT2E-AS1	3367.99	4257.58	4729.61	9107.76	16123.2	18823.4	0.0155473
PHYKPL	4958.77	10355.9	6561.7	8440.42	46923	34253.8	0.0155633
DMRT3	0	0	0	38.7346	679.541	449.115	0.0155676
CBFA2T3	15.9645	14.3757	78.7683	7.74108	357.384	262.361	0.015575
RASGEF1A	204.087	176.707	123.933	121.797	520.131	393.787	0.0157229
RNF223	50.1262	0	49.4642	24.3058	2378.92	1560.84	0.0157584
GBX2	0	0	365.757	978.512	36914.5	24151.5	0.0157744
PTK6	129.406	14.5659	95.7729	78.4352	492.474	391.755	0.0158439
LDHC	0	0	89.8147	0	285.252	236.175	0.0158679
AC120024.4	0	0	87.803	107.862	7967.5	5194.91	0.0159167
ELAVL3	40.0504	9.01612	39.5215	0	143.452	138.566	0.0159247
AL591848.3	256.981	274.794	348.683	389.401	2042.25	2972.94	0.0159861
MUC20	134.629	131.333	154.993	184.962	542.49	407.567	0.0160005
AC008764.10	0	23.4567	102.821	126.311	1072.98	1622.25	0.0162304
AC127002.1	0	283.027	206.771	101.604	5816.54	8880.78	0.016254
ALOX12	583.119	1165.03	647.346	1131	2610.76	2805.55	0.0162712
LRRN4	0	31.8913	0	0	2124.78	3277.74	0.0163228
EIF1P6	0	257.04	845.038	276.825	1789.23	1728.29	0.0163366
AC020978.4	207.261	1026.49	409.047	502.497	2412.68	2509.78	0.0165309
KCNK7	243.992	219.71	240.77	739.439	2621.78	1952.13	0.0165972
FSCN2	708.321	212.609	139.793	228.973	3678.73	2573.18	0.0167025
EEF1A2	5228.02	1990.08	4549.28	3710.36	60390.1	40533.3	0.0167456
FGF18	528.066	324.213	568.465	279.334	3095.05	2200.71	0.0168005
GZMM	0	0	0	0	813.065	523.583	0.0168522
FGF4	0	0	0	0	158.438	102.028	0.0168522
SLC25A47	0	0	0	0	142.365	91.678	0.0168522
GATA3-AS1	0	0	0	0	107.974	69.5315	0.0168522
AC023137.1	0	0	0	0	1663.09	1070.97	0.0168522
RPL7P60	0	0	0	0	348.456	224.393	0.0168522
OR2K2	0	0	0	0	229.494	147.786	0.0168522
TRIM43B	0	0	0	0	307.093	197.756	0.0168522
HIST1H4K	0	0	0	0	820.883	528.618	0.0168522
AC136285.1	0	0	0	0	176.998	113.98	0.0168522
COL20A1	0	0	0	0	23.3384	15.029	0.0168522
RLN3	0	0	0	0	370.109	238.336	0.0168522
LBX1-AS1	0	0	0	0	74.2794	47.8331	0.0168522
POU3F3	560.091	560.388	337.758	603.521	5795.47	3929.44	0.0168943
DNAAF3	115.494	90.9995	56.9842	70.0026	258.546	199.792	0.0169129
BIRC6-AS1	0	0	0	198.98	612.423	828.193	0.016961
AC005534.1	0	115.703	0	124.608	460.225	555.69	0.0170974
AC027682.1	0	47.7483	104.651	565.658	1234.52	1192.48	0.0171126
MISP	0	0	31.7198	31.1731	201.484	305.835	0.0171352
ADRA2C	1093.85	453.094	1381.64	1294.18	26446.1	17370.9	0.0171858
USH2A	18.5975	18.8399	22.9398	15.7811	62.4489	48.2577	0.0173534
WNT11	317.668	89.3914	391.84	173.289	1600.05	1202.1	0.0173931
SLC25A36P1	615.097	923.134	1416.27	596.513	2937.52	2837.48	0.0174372
AC104390.1	0	0	180.925	0	492.53	634.341	0.0174557
MUC5AC	5.46424	2.46021	328.916	998.888	5793.23	3908.64	0.0175311
AC100812.1	0	148.02	162.208	0	588.771	568.72	0.0176024
AC008937.1	104.311	516.612	205.866	101.159	1214.26	1172.91	0.0176195
AMH	184.267	315.264	690.969	1197.29	3267.03	4685.84	0.0176682
CHRNA3	100.042	18.0171	59.2325	164.933	519.577	415.35	0.017711
AC104117.5	0	78.4749	0	0	312.146	452.272	0.0177222
AC093484.2	0	19.818	0	0	78.829	114.217	0.0177222
TUBB2B	217.274	58.6952	814.739	2992.08	46187.9	71677.1	0.0177886
CNKSR1	94.326	42.4692	139.62	217.256	380.087	489.524	0.0178049
AL606760.3	79.6491	23.9074	52.3982	51.4951	237.738	321.498	0.0178088
NKX3-2	136.151	0	33.5883	82.5236	1219.16	1854.79	0.0178651
AC080188.2	172.717	0	0	0	463.977	597.568	0.0179065
DHH	49.2459	88.6896	0	71.637	617.358	425.952	0.0179165
TRIL	386.383	234.852	381.28	252.929	1176.35	919.055	0.0179342
EFNB1	25316.6	12357	21973	20687.6	208535	141115	0.0180271
ELF3	0	5.96937	13.0831	32.1442	261.185	401.37	0.0180591
HBQ1	711.493	480.512	702.096	689.996	2229.86	1692.37	0.0180593
TMEM151A	223.279	100.529	183.608	306.755	2899.04	1931.25	0.0181026
PRAG1	10848.2	4569.18	9055.09	6193.5	46689.9	33917.3	0.0181529
AL096701.3	120.99	0	119.392	58.6672	650.039	941.852	0.0182646
LINC02138	71.9005	64.7447	70.9509	104.592	1030.13	684.093	0.0183176
AC027601.3	374.617	168.667	739.339	1180.72	2851.32	4050.31	0.0183716
NUTM2G	122.043	98.9073	72.2587	189.369	1136.54	781.152	0.0184232
SHH	0	8.52039	18.6743	91.7621	2796.02	1784.16	0.0186053
HIST1H2AE	1311.16	1096.34	554.504	1362.37	3019.04	3564.27	0.018682
TCAP	0	384.168	487.466	718.597	2493.19	3612.43	0.0187563
RN7SKP78	299.811	0	295.852	581.506	5100.83	3371.18	0.0187852
PALM3	263.474	152.519	74.2842	219.012	572.965	586.008	0.0188317
GATA3	87.925	13.1957	28.9213	28.4228	2178.25	1394.26	0.0188506
TPH2	0	0	0	6.67192	24.6419	35.704	0.0188535
AP000356.3	0	0	0	28.8395	106.515	154.331	0.0188535
AL590560.3	0	0	0	100.281	370.377	536.644	0.0188535
AC092117.2	57.4684	103.498	113.419	83.598	566.058	397.658	0.0188696
MUC2	0	0	14.8545	25.5473	1179.45	748.67	0.0189403
LINC00881	0	0	0	36.43	1950.97	1234.69	0.0190816
FOSB	4498.3	2813.79	4133.93	4895.21	78884	51293.3	0.0191313
SEC1P	36.1959	32.5936	35.7179	52.6534	97.2344	125.231	0.0192668
RN7SL76P	0	0	325.539	159.964	3544.85	2282.75	0.0192842
AL035071.2	0	561.121	409.939	503.592	3905.9	2694.91	0.0194252
NPAS3	61.9024	55.7417	50.9041	50.0268	166.291	232.017	0.0194888
BEND3	13536.4	9364.7	18626.3	15682.5	45251.2	34509.9	0.0195184
FAM155B	23.7578	0	23.444	11.52	446.75	287.69	0.0196211
SOX1	33.5468	15.1041	33.1038	81.3331	1081.42	696.391	0.0196662
APOL4	43.5641	58.8427	42.9888	21.1239	117.028	150.723	0.0197566
OVGP1	965.656	1321.05	1282.75	1512.78	6451.94	9508.94	0.0198967
AC025594.2	439.805	462.04	409.886	296.192	3063.06	2071.12	0.0200428
C1orf100	0	74.5886	163.477	160.659	667.547	1003.04	0.0202072
KCNK5	25.3834	34.2857	250.482	184.623	909.178	1383.19	0.0202127
AC010761.4	548.983	576.738	541.733	532.396	2457.92	1741.09	0.0202899
MARVELD3	14.7906	46.615	14.5952	14.3437	105.953	140.724	0.02034
DKFZP434A062	151.906	119.689	112.425	174.938	663.115	476.293	0.0204445
AC105429.1	0	64.3725	164.6	254.2	746.817	1112.99	0.0204647
AL391839.2	248.93	224.155	0	362.113	2897.74	1937.8	0.0204768
MSX1	11782.6	7491.76	22366.4	21174.1	158300	104520	0.0204774
LRCH4	2858.25	4607.71	3508.43	5733.08	10325	11915	0.0205038
RPL21P1	200.294	541.081	790.596	971.213	1614.17	2078.93	0.0205654
AL354983.1	0	94.7588	103.842	255.131	2544.19	1638.36	0.0206657
SLC11A1	109.889	54.4241	184.345	127.883	1633.44	1064.55	0.0207117
LGALS4	0	16.229	35.5693	34.9563	387.32	249.42	0.0207325
AC009336.3	0	0	0	0	97.754	157.375	0.0208334
AF186192.3	0	0	0	0	270.449	435.398	0.0208334
AL671309.1	0	0	0	0	470.8	757.944	0.0208334
CCDC27	0	0	0	0	59.7702	96.2244	0.0208334
AL118496.2	0	0	0	0	2227.09	3585.41	0.0208334
FP236240.1	0	0	0	0	308.573	496.773	0.0208334
ZDHHC11B	0	0	0	0	52.9164	85.1904	0.0208334
FOXD3	0	0	90.2022	88.6476	16329.5	10159.8	0.0208357
PLA2G10	0	0	0	82.849	611.984	960.606	0.0208531
CDH15	61.8021	46.3761	121.972	79.9131	313.596	231.641	0.0209958
AC004471.1	163.814	368.778	1454.86	2700.71	8361.16	12610.5	0.0210776
AC013394.1	40.2788	262.959	99.3672	322.26	1063.99	1463.25	0.0210783
COL17A1	0	20.04	43.922	28.7767	730.695	461.985	0.0212212
LINC002481	0	188.581	51.6644	101.548	1359.57	905.704	0.0213717
AL121652.1	0	383.266	420.004	412.765	1715.06	1288.51	0.0214846
AP002383.5	0	0	81.0344	159.276	2720.72	1704.69	0.0215151
RGS9BP	164.72	103.829	0	143.769	501.493	427.424	0.0215276

## Sheet: b. GO wt ICP4 positive
Overlap Results
Collection(s):	BP
# overlaps shown:	20
# genesets in collections:	4436
# genes in comparison (n):	499
# genes in universe (N):	45956
Gene Set Name	# Genes in Gene Set (K)	Description	# Genes in Overlap (k)	k/K	p-value	FDR q-value
GO_REGULATION_OF_TRANSCRIPTION_FROM_RNA_POLYMERASE_II_PROMOTER	1784	Any process that modulates the frequency, rate or extent of transcription from an RNA polymerase II promoter.	100	0.0561	3.14e-42	3.48e-39
GO_POSITIVE_REGULATION_OF_GENE_EXPRESSION	1733	Any process that increases the frequency, rate or extent of gene expression. Gene expression is the process in which a gene's coding sequence is converted into a mature gene product or products (proteins or RNA). This includes the production of an RNA transcript as well as any processing to produce a mature RNA product or an mRNA (for protein-coding genes) and the translation of that mRNA into pr…	99	0.0571	1.68e-42	2.49e-39
GO_TISSUE_DEVELOPMENT	1518	The process whose specific outcome is the progression of a tissue over time, from its formation to the mature structure.	97	0.0639	8.93e-46	3.96e-42
GO_POSITIVE_REGULATION_OF_BIOSYNTHETIC_PROCESS	1805	Any process that activates or increases the frequency, rate or extent of the chemical reactions and pathways resulting in the formation of substances.	95	0.0526	8.32e-38	6.15e-35
GO_CELL_DEVELOPMENT	1426	The process whose specific outcome is the progression of the cell over time, from its formation to the mature structure. Cell development does not include the steps involved in committing a cell to a specific fate.	91	0.0638	8.23e-43	1.83e-39
GO_REGULATION_OF_MULTICELLULAR_ORGANISMAL_DEVELOPMENT	1672	Any process that modulates the frequency, rate or extent of multicellular organismal development.	88	0.0526	6.01e-35	2.67e-32
GO_REGULATION_OF_CELL_DIFFERENTIATION	1492	Any process that modulates the frequency, rate or extent of cell differentiation, the process in which relatively unspecialized cells acquire specialized structural and functional features.	86	0.0576	4.64e-37	2.94e-34
GO_NEUROGENESIS	1402	Generation of cells within the nervous system.	85	0.0606	2.98e-38	2.65e-35
GO_RESPONSE_TO_EXTERNAL_STIMULUS	1821	Any process that results in a change in state or activity of a cell or an organism (in terms of movement, secretion, enzyme production, gene expression, etc.) as a result of an external stimulus.	80	0.0439	1.63e-26	3.62e-24
GO_REGULATION_OF_CELL_PROLIFERATION	1496	Any process that modulates the frequency, rate or extent of cell proliferation.	79	0.0528	2.03e-31	6.93e-29
GO_REPRODUCTION	1297	The production of new individuals that contain some portion of genetic material inherited from one or more parent organisms.	71	0.0547	3.56e-29	1.13e-26
GO_POSITIVE_REGULATION_OF_MULTICELLULAR_ORGANISMAL_PROCESS	1395	Any process that activates or increases the frequency, rate or extent of an organismal process, any of the processes pertinent to the function of an organism above the cellular level; includes the integrated processes of tissues and organs.	71	0.0509	2.85e-27	7.02e-25
GO_POSITIVE_REGULATION_OF_TRANSCRIPTION_FROM_RNA_POLYMERASE_II_PROMOTER	1004	Any process that activates or increases the frequency, rate or extent of transcription from an RNA polymerase II promoter.	70	0.0697	3.17e-35	1.56e-32
GO_EPITHELIUM_DEVELOPMENT	945	The process whose specific outcome is the progression of an epithelium over time, from its formation to the mature structure. An epithelium is a tissue that covers the internal or external surfaces of an anatomical structure.	66	0.0698	2.91e-33	1.17e-30
GO_ORGAN_MORPHOGENESIS	841	Morphogenesis of an organ. An organ is defined as a tissue or set of tissues that work together to perform a specific function or functions. Morphogenesis is the process in which anatomical structures are generated and organized. Organs are commonly observed as visibly distinct structures, but may also exist as loosely associated clusters of cells that work together to perform a specific function…	65	0.0773	2.32e-35	1.29e-32
GO_NEURON_DIFFERENTIATION	874	The process in which a relatively unspecialized cell acquires specialized features of a neuron.	62	0.0709	1.21e-31	4.49e-29
GO_NEGATIVE_REGULATION_OF_MULTICELLULAR_ORGANISMAL_PROCESS	983	Any process that stops, prevents, or reduces the frequency, rate or extent of an organismal process, the processes pertinent to the function of an organism above the cellular level; includes the integrated processes of tissues and organs.	60	0.061	3.71e-27	8.66e-25
GO_EMBRYO_DEVELOPMENT	894	The process whose specific outcome is the progression of an embryo from its formation until the end of its embryonic life stage. The end of the embryonic stage is organism-specific. For example, for mammals, the process would begin with zygote formation and end with birth. For insects, the process would begin at zygote formation and end with larval hatching. For plant zygotic embryos, this would …	58	0.0649	1.27e-27	3.53e-25
GO_CENTRAL_NERVOUS_SYSTEM_DEVELOPMENT	872	The process whose specific outcome is the progression of the central nervous system over time, from its formation to the mature structure. The central nervous system is the core nervous system that serves an integrating and coordinating function. In vertebrates it consists of the brain and spinal cord. In those invertebrates with a central nervous system it typically consists of a brain, cerebral…	57	0.0654	2.55e-27	6.66e-25
GO_SENSORY_ORGAN_DEVELOPMENT	493	The process whose specific outcome is the progression of sensory organs over time, from its formation to the mature structure.	46	0.0933	1.06e-28	3.12e-26

## Sheet: c. TF wt ICP4 positive
Overlap Results
Collection(s):	TFT
# overlaps shown:	20
# genesets in collections:	615
# genes in comparison (n):	499
# genes in universe (N):	45956
Gene Set Name	# Genes in Gene Set (K)	Description	# Genes in Overlap (k)	k/K	p-value	FDR q-value
CAGGTG_E12_Q6	2485	Genes having at least one occurence of the highly conserved motif M12 CAGGTG sites. The motif matches transcription factor binding site V$E12_Q6 (v7.4 TRANSFAC).	122	0.0491	5.16e-46	3.17e-43
GGGCGGR_SP1_Q6	2940	Genes having at least one occurence of the highly conserved motif M6 GGGCGGR sites. The motif matches transcription factor binding site V$SP1_Q6 (v7.4 TRANSFAC).	100	0.034	1.33e-24	2.73e-22
GGGAGGRR_MAZ_Q6	2274	Genes having at least one occurence of the highly conserved motif M24 GGGAGGRR sites. The motif matches transcription factor binding site V$MAZ_Q6 (v7.4 TRANSFAC).	96	0.0422	1.4e-30	4.3e-28
TTGTTT_FOXO4_01	2061	Genes having at least one occurence of the highly conserved motif M60 TTGTTT sites. The motif matches transcription factor binding site V$FOXO4_01 (v7.4 TRANSFAC).	74	0.0359	1.82e-19	1.87e-17
CAGCTG_AP4_Q5	1524	Genes having at least one occurence of the highly conserved motif M15 CAGCTG sites. The motif matches transcription factor binding site V$AP4_Q5 (v7.4 TRANSFAC).	69	0.0453	1.3e-23	2e-21
CTTTGT_LEF1_Q2	1972	Genes having at least one occurence of the highly conserved motif M13 CTTTGT sites. The motif matches transcription factor binding site V$LEF1_Q2 (v7.4 TRANSFAC).	69	0.035	1.34e-17	1.03e-15
TGANTCA_AP1_C	1121	Genes having at least one occurence of the highly conserved motif M7 TGANTCA sites. The motif matches transcription factor binding site V$AP1_C (v7.4 TRANSFAC).	57	0.0508	5.79e-22	7.12e-20
GGGTGGRR_PAX4_03	1294	Genes having at least one occurence of the highly conserved motif M56 GGGTGGRR sites. The motif matches transcription factor binding site V$PAX4_03 (v7.4 TRANSFAC).	57	0.044	4.69e-19	4.12e-17
AACTTT_UNKNOWN	1890	Genes having at least one occurence of the highly conserved motif M17 AACTTT in the region spanning up to 4 kb around their transcription start sites. The motif does not match any known transcription factor binding site (v7.4 TRANSFAC).	57	0.0302	4.93e-12	1.78e-10
TATAAA_TATA_01	1296	Genes having at least one occurence of the highly conserved motif M51 TATAAA sites. The motif matches transcription factor binding site V$TATA_01 (v7.4 TRANSFAC).	51	0.0394	3.54e-15	2.18e-13
GATTGGY_NFY_Q6_01	1160	Genes having at least one occurence of the highly conserved motif M5 GATTGGY sites. The motif matches transcription factor binding site V$NFY_Q6_01 (v7.4 TRANSFAC).	45	0.0388	2.68e-13	1.37e-11
GCANCTGNY_MYOD_Q6	924	Genes having at least one occurence of the highly conserved motif M35 GCANCTGNY sites. The motif matches transcription factor binding site V$MYOD_Q6 (v7.4 TRANSFAC).	44	0.0476	3.98e-16	2.72e-14
TGACCTY_ERR1_Q2	1043	Genes having at least one occurence of the highly conserved motif M25 TGACCTY sites. The motif matches transcription factor binding site V$ERR1_Q2 (v7.4 TRANSFAC).	41	0.0393	2.14e-12	9.38e-11
CTTTAAR_UNKNOWN	972	Genes having at least one occurence of the highly conserved motif M29 CTTTAAR in the region spanning up to 4 kb around their transcription start sites. The motif does not match any known transcription factor binding site (v7.4 TRANSFAC).	39	0.0401	4.07e-12	1.57e-10
RTAAACA_FREAC2_01	919	Genes having at least one occurence of the highly conserved motif M36 RTAAACA sites. The motif matches transcription factor binding site V$FREAC2_01 (v7.4 TRANSFAC).	35	0.0381	2.16e-10	6.63e-09
TGAYRTCA_ATF3_Q6	538	Genes having at least one occurence of the highly conserved motif M9 TGAYRTCA sites. The motif matches transcription factor binding site V$ATF3_Q6 (v7.4 TRANSFAC).	31	0.0576	7.35e-14	4.11e-12
YATGNWAAT_OCT_C	360	Genes having at least one occurence of the highly conserved motif M44 YATGNWAAT sites. The motif matches transcription factor binding site V$OCT_C (v7.4 TRANSFAC).	24	0.0667	2.39e-12	9.79e-11
CREB_01	262	Genes having at least one occurence of the transcription factor binding site V$CREB_01 (v7.4 TRANSFAC) in the regions spanning up to 4 kb around their transcription starting sites.	21	0.0802	1.74e-12	8.25e-11
BACH2_01	271	Genes having at least one occurence of the transcription factor binding site V$BACH2_01 (v7.4 TRANSFAC) in the regions spanning up to 4 kb around their transcription starting sites.	20	0.0738	2.65e-11	9.05e-10
MYOD_Q6_01	257	Genes having at least one occurence of the transcription factor binding site V$MYOD_Q6_01 (v7.4 TRANSFAC) in the regions spanning up to 4 kb around their transcription starting sites.	19	0.0739	8.08e-11	2.62e-09

## Sheet: d. dICP0 ICP4 positive
Gene_name	mock_1	mock_2	D0_neg_1	D0_neg_2	D0_pos_1	D0_pos_2	p_value_FDR_corrected
LINC00115	434.351	977.807	1239.15	2656.74	6834.98	8330.5	0.008167
TUBB8P11	0	0	0	0	66.9937	50.3389	0.0050246
NDUFB4P8	0	0	247.042	125.446	965.658	725.593	0.0091794
KLHL21	54971.4	32220.7	70077.4	71529.5	475613	462341	5.99407e-05
AL139424.3	0	216.341	114.235	386.716	1756.35	1632.87	0.00318232
AL139424.2	258.199	377.816	797.994	716.917	4127.03	3858.27	0.000154708
RPL23AP89	0	0	0	0	277.958	208.857	0.0050246
EPHA2	20264.6	22376.3	48002.7	60716.8	128431	126058	0.000618027
RNU1-2	0	0	0	0	1296.57	974.242	0.0050246
PADI1	19.4452	70.04	36.9832	18.7797	159.019	195.524	0.0197654
ALDH4A1	2713.66	2548.32	1917	2807.99	9568.42	12704.7	0.0114441
MIR1290	0	0	0	0	908.709	1365.6	0.0136378
IFFO2	11386	12625.2	22299.8	29864	234355	281587	0.00179676
AL627311.1	0	0	0	0	616.342	926.236	0.0136378
AL031005.1	131.867	118.743	0	0	294.105	294.653	3.10185e-05
CDC42-IT1	0	62.0314	131.018	66.5297	409.707	307.853	0.0190294
AL031281.2	127.46	0	0	123.098	947.585	996.818	0.00185547
CNR2	0	0	0	0	13.4905	10.1368	0.0050246
AL031432.5	376.342	282.406	238.591	363.462	4196.8	4555.01	0.000203629
RNU6-110P	0	0	0	0	681.532	512.101	0.0050246
AL355877.2	266.313	479.617	0	128.599	989.935	1338.9	0.0171898
FAM46B	523.404	706.97	1148.62	1710.89	9548.35	9491.18	7.75209e-05
SNORD99	36074.6	17982.4	105367	52882.1	338114	313074	0.00239529
MATN1	124.195	139.793	196.84	179.916	2415.99	1618.8	0.0164328
AL356320.2	0	84.6662	0	0	419.404	315.139	0.0121644
FAM229A	469.16	950.553	1210.98	825.295	4409.72	4286.89	0.00131483
RNF19B	12164.1	10476.5	46721.7	46126.7	532627	343977	0.0198753
HMGB4	0	0	0	0	27.6764	20.796	0.0050246
AL138787.1	0	0	0	0	42.3413	63.6303	0.0136378
TEKT2	144.601	43.4032	183.346	69.8259	1254.18	996.242	0.00561373
UBE2V2P4	0	0	0	0	273.665	205.631	0.0050246
AL663070.1	394.51	592.079	625.272	952.521	4888.23	3673	0.00914143
SLFNL1-AS1	456.837	742.258	1416.63	1333.2	3913.13	4848.75	0.00501892
AC099795.2	0	97.5585	206.055	0	1933.07	1573.55	0.0036178
AL139220.1	0	0	0	88.5356	408.919	307.261	0.0133412
TESK2	1664.58	1382.62	2510.87	2508.42	8811.91	9058.12	3.55029e-05
CCDC17	172.146	206.684	163.703	263.236	2751.56	2388.06	0.00092363
AL162430.2	0	0	0	0	162.941	244.867	0.0136378
TXNDC12-AS1	0	0	0	0	181.277	136.211	0.0050246
AL590093.1	0	0	0	0	113.771	170.974	0.0136378
GADD45A	96445.9	72116.9	291581	202512	1.26106e+06	947122	0.00882014
PTGER3	385.192	209.003	375.694	276.622	1586.03	1451.05	0.00183244
ZRANB2-AS1	98.5936	310.734	281.275	428.487	1026.17	991.369	0.00934451
GTF2B	54804.4	51549.5	104315	99381.2	242933	230556	0.000132082
CCNJP2	0	0	0	0	60.9452	45.7941	0.0050246
RPL23AP90	403.983	363.778	0	195.079	1501.68	1354.03	0.00191691
AL445928.1	0	0	0	0	319.276	239.903	0.0050246
CDC14A	4733.68	5255.11	11180.7	9985.06	29995.7	24514.8	0.00487041
AL109741.3	161.047	145.019	153.149	77.7678	359.186	359.855	0.00836921
AMY2A	0	0	0	0	37.3442	28.0604	0.0050246
AL158847.1	0	0	0	56.9784	175.444	197.742	0.00931273
C1orf162	68.8873	356.681	131.018	266.119	2611.88	3251.7	0.0039788
AKR7A2P1	729.377	187.654	1882.65	1207.57	11232.2	15482.8	0.0092091
RSBN1	20972.3	16618.9	44860.2	40353.8	103112	90545	0.00186997
RNY1P13	908	1635.27	0	1315.39	22276.4	21810.6	9.51418e-05
AL157902.2	447.306	402.789	121.534	61.7139	1377.68	1356.45	7.09764e-05
AC242852.2	0	0	0	0	39.2249	29.4735	0.0050246
SRGAP2B	567.029	849.016	902.882	795.964	2441.07	2209.9	0.00326226
LINC01138	305.292	269.181	459.673	399.267	1106.46	1144.05	0.000247438
HIST2H2BF	29.831	94.0176	113.472	201.671	1685.49	1266.47	0.00687851
AC239868.2	7939.73	8173.62	8872.17	9610.43	28621	26870.5	0.000228994
HIST2H2BC	1808.17	2664.36	2344.77	3810.09	10509.7	10927.2	0.0022522
HIST2H2BE	12471.5	6749.95	11859.9	11331.3	47037.5	35902.2	0.0139801
HIST2H2AC	1466.77	660.396	697.419	2124.86	8541.87	9012.99	0.00257814
HIST2H2AB	242.595	0	0	351.439	1623.19	1897.25	0.00677589
ADAMTSL4-AS1	109.085	605.741	345.783	351.171	3000.61	4123.37	0.0118686
RN7SL473P	318.863	0	0	615.9	4504.04	6234.28	0.0102067
SEMA6C	984.748	1315.34	1404.68	1878.32	6637.69	6179.42	0.000714258
TUFT1	2015.96	1959.22	9328.29	8286.46	54959.8	41255.5	0.00703221
S100A14	149.319	268.916	354.99	324.469	1942.66	1960.18	9.34147e-05
AL451085.1	0	0	0	0	102.724	77.1863	0.0050246
POU5F1P4	0	0	0	42.4318	849.245	736.293	0.000831177
AL353807.2	0	390.234	412.111	627.798	2577.43	2178.76	0.0055184
RAB25	0	0	0	0	41.7183	31.347	0.0050246
AL590560.3	0	0	393.338	199.733	922.507	924.227	0.00296708
AL391825.1	69.8974	31.4705	66.4695	67.5052	1818.75	1952.29	0.000100767
NOS1AP	171.762	121.524	210.006	308.069	2362.34	3234.85	0.00836652
C1orf226	254.523	152.795	322.721	409.687	1876.45	2452.62	0.00672147
CD247	0	0	0	11.4126	263.557	409.275	0.0174023
ATP1B1	45996.2	44346	35476	47997	93875.6	100997	0.0042556
SLC9C2	0	0	0	0	57.6724	43.3349	0.0050246
GAS5-AS1	2472.8	2783.37	1437.04	2918.87	7659.87	9746.16	0.0142806
RNA5SP67	0	0	692.095	0	2164.25	2439.32	0.00893796
RC3H1-IT1	0	0	0	102.765	316.426	356.642	0.00931273
CLEC20A	0	0	0	0	246.109	166.433	0.0121968
AL353708.2	0	0	0	0	475.7	357.44	0.0050246
AL162431.1	0	0	0	0	1610.89	1495.23	9.45704e-05
AL162431.2	393.317	495.842	486.237	531.798	1081.9	1252.37	0.00559878
IER5	74054.7	61365	133702	123979	318669	249939	0.0103661
APOBEC4	0	16.1801	0	17.3534	133.583	120.449	0.00266442
LINC01031	0	0	116.386	0	909.876	1230.62	0.00759235
KRT8P29	0	0	0	0	103.398	77.693	0.0050246
PIK3C2B	354.461	232.549	308.186	381.454	4818.65	3326.54	0.0134009
CNTN2	0	2.41359	0	0	67.7508	71.8699	7.51547e-05
PM20D1	0	0	0	17.6123	81.3458	61.1231	0.0133412
RASSF5	205.003	166.14	415.892	362.976	2621.4	2290.36	0.000845745
C4BPB	0	13.3351	0	0	286.248	330.901	0.000806194
AL590648.2	0	19.2925	0	0	222.991	191.491	0.0013663
FAM71A	0	0	0	0	153.751	138.634	0.000252396
AC096638.1	0	0	0	0	1312.58	1479.4	0.000388773
AC092811.2	0	0	0	0	126.797	95.2747	0.0050246
HIST3H2BB	80.6599	272.372	38.3521	253.173	1019.41	1148.98	0.00860664
ACTA1	63.7726	200.99	242.58	0	805.986	926.236	0.0144951
MAP3K21	999.649	883.893	1878.34	2029.74	6330.43	5173.8	0.00419517
AL732292.2	886.884	399.309	632.542	321.199	3791.22	3096.43	0.00667794
RPS21P1	385.992	173.788	734.125	931.954	2008.73	2371.84	0.00448219
AKT3-IT1	0	0	0	0	137.097	206.029	0.0136378
AL645465.1	0	0	0	0	110.404	165.915	0.0136378
TGIF2P1	0	0	132.357	0	517.367	388.749	0.017101
AL591848.3	256.981	274.794	549.852	372.279	1194.06	915.157	0.0205863
ALKAL2	87.0288	58.7756	165.522	210.126	1002.86	1531.4	0.0206002
GAPDHP48	0	0	0	0	73.7558	55.4199	0.0050246
GRHL1	539.525	523.616	1527.8	1007.38	4510.18	3442.52	0.0114725
AC011239.2	0	0	0	0	95.2039	71.536	0.0050246
EFR3B	648.143	449.887	393.784	352.103	1338.48	1267.22	0.00350675
RN7SL856P	0	0	0	0	237.85	178.72	0.0050246
UCN	479.698	323.968	684.26	521.191	1604.81	1674.8	0.00193712
AC104695.3	0	0	0	466.607	6704.8	7377.03	0.000375585
AC009305.1	0	0	0	0	192.607	289.449	0.0136378
KRT18P52	0	0	214.337	54.4191	670.254	503.627	0.016903
BIRC6-AS1	0	0	0	0	915.228	1298.99	0.00895259
CDKL4	91.9383	165.577	131.144	88.7918	1059.43	744.695	0.0150863
SLC3A1	0	0	0	0	54.1808	81.4226	0.0136378
AC016722.3	503.216	261.424	515.348	934.603	2302.21	2551.57	0.00518976
STPG4	0	24.4174	0	52.376	241.909	302.95	0.00787773
AC073283.1	0	99.8273	105.424	53.5332	412.089	433.5	0.00704773
AC107081.1	0	1189.08	251.148	382.592	3141.47	3245.67	0.0172675
AC107081.3	0	0	44.5744	90.5379	1707.52	2068.55	0.00169695
SERTAD2	47518	32101.9	106893	83102.7	224274	191863	0.00533714
MXD1	5464.3	3757.95	9379.08	9133.77	28235.7	29434.3	0.000191565
EMX1	0	0	0	0	25.6995	38.6211	0.0136378
AC010913.1	494.844	534.715	690.179	796.514	3801.49	3206.57	0.00207993
MIR4779	0	0	0	0	853.968	641.669	0.0050246
CNNM4	10084.9	7786.34	13319.9	17712	98842.3	103408	9.91213e-05
ACTP1	0	0	0	0	370.127	278.113	0.0050246
ACOXL-AS1	0	0	0	0	41.305	46.5547	0.000388773
BCL2L11	1632.44	1224.98	7911.69	12923.7	532542	493774	0.000104745
MERTK	162.281	191.796	270.064	225.295	769.116	793.213	0.00024772
FOXD4L1	0	0	36.3968	55.4458	256.087	171.043	0.0184724
SAP130	28429.8	26886.3	41092.4	44554.1	102680	94167.7	0.0006833
MIR3679	0	0	0	0	2084.69	3132.86	0.0136378
TBR1	9.93125	0	9.44421	19.1827	177.198	116.503	0.0191039
AC106900.1	0	188.271	0	0	1088.06	817.566	0.010169
AC018735.1	0	0	0	0	94.3799	70.9169	0.0050246
DNAJB1P1	0	0	0	0	69.2181	104.021	0.0136378
C2orf66	57.124	128.597	162.968	82.7535	679.49	574.388	0.00530215
AC020550.1	0	0	0	0	434.842	326.74	0.0050246
BOLL	0	0	0	0	35.4043	39.904	0.000388773
SATB2	8535.18	6060.06	14371.6	14133.4	37503	37909.9	0.000173961
SATB2-AS1	127.973	220.871	283.96	442.876	1331.96	1060.41	0.00908511
RPL23AP30	0	0	0	0	141.476	106.305	0.0050246
AC073410.1	161.868	218.637	307.859	312.656	4332.18	4792.37	0.000283472
CATIP-AS2	0	0	0	0	132.485	199.097	0.0136378
SNRPGP8	0	0	0	0	313.625	235.657	0.0050246
AC018738.1	0	0	0	0	337.521	507.224	0.0136378
AC017104.2	0	0	0	143.422	662.424	663.658	0.00262948
AC017104.3	0	0	478.861	567.376	5740.23	7126.14	0.00252362
AC073476.4	0	0	0	0	984.435	739.702	0.0050246
ECEL1P3	0	0	0	0	288.518	216.792	0.0050246
ARL4C	8885.41	6696.12	5919.28	7881.5	40941.5	53285.1	0.00704824
GBX2	0	0	39.1639	59.6612	2173.84	1449.37	0.0139952
HES6	608.454	863.994	2225.44	2915.55	51463.2	32159.1	0.0225156
BHLHE40-AS1	105.271	78.9948	0	67.7785	521.747	509.651	0.000958352
LHFPL4	0	32.2205	51.0402	60.4747	146.307	149.911	0.00523032
TMEM40	0	0	0	0	19.8987	14.9519	0.0050246
EAF1-AS1	0	49.6711	104.911	117.201	1148.24	1454.41	0.00351532
RNU6-922P	0	0	0	0	715.953	1075.93	0.0136378
CNOT10-AS1	0	0	0	0	152.102	114.289	0.0050246
AC006058.3	2675.58	2931.32	2120.31	3359.22	19294.6	17238	0.00085712
LINC01988	0	0	0	0	71.5953	53.7965	0.0050246
NRADDP	165.521	74.5239	52.4678	133.213	1025.45	1047.91	0.000534271
MIR425	0	493.399	0	1587.54	13850	12243.3	0.00141351
MIR191	0	466.584	1970.97	500.419	6933.85	6946.77	0.00331399
SEMA3F-AS1	581.933	1906.84	1506.46	1358.21	7402.79	9662.03	0.0103428
MIR5787	0	0	0	0	1288.71	968.337	0.0050246
IQCF1	0	0	0	0	95.14	71.488	0.0050246
AC115284.2	92.8335	104.493	132.421	156.899	552.127	388.938	0.0212984
FLNB-AS1	488.396	1215.21	586.666	521.331	4070.45	3790.85	0.00312513
PSMD6-AS2	737.565	838.94	2214.93	1443.39	11543.9	10755.8	0.000320966
PDZRN3-AS1	0	0	113.472	86.4303	443.55	599.909	0.00782869
CBX5P1	0	0	0	0	252.689	379.74	0.0136378
OR5K2	0	0	0	0	133.735	150.732	0.000388773
PDLIM1P4	0	0	0	0	140.913	211.764	0.0136378
MIR567	0	0	0	0	723.258	1086.91	0.0136378
GCSAM	529.247	487.922	1198.31	924.908	4234.4	3716.7	0.00135729
CD200	0	14.3516	0	0	47.3951	53.4188	0.00774117
MARK2P8	0	180.36	380.943	96.7196	3722.65	4811.17	0.00470691
AC108673.3	0	768.819	1353.2	1511.71	3173.7	4292.48	0.0200116
AC010207.1	0	88.2338	232.951	236.58	1602.62	1642.09	6.24227e-05
RPL39P5	424.677	191.206	403.85	205.071	947.162	1067.54	0.0211358
NPM1P17	0	0	0	0	117.74	88.4694	0.0050246
KRT8P36	198.625	59.6191	62.9614	383.654	5168.28	4808.06	0.00025891
GAPDHP39	0	0	0	0	72.3997	108.802	0.0136378
RASA2-IT1	0	0	0	0	115.816	87.0238	0.0050246
GRK7	0	0	0	14.2138	65.6493	82.2145	0.00642487
GAPDHP47	0	0	0	0	70.9503	53.3119	0.0050246
AC108751.3	0	0	0	0	69.4895	52.2143	0.0050246
TSC22D2	14011.9	12698.3	40300.5	37549.2	126206	93658.6	0.0113982
AC117394.2	295.17	132.897	0	0	877.762	989.323	0.00279978
AC106707.1	0	0	0	0	41.7921	31.4024	0.0050246
PPM1L	612.774	444.88	473.462	580.706	2329.05	3033.69	0.00847255
AC092964.1	0	61.3663	0	65.8163	303.986	380.69	0.0117082
GHSR	0	0	0	0	56.8855	42.7436	0.0050246
PEX5L	37.2567	20.968	79.7167	26.9862	193.886	171.701	0.0150067
CYP2AB1P	0	0	0	0	77.4214	58.1743	0.0050246
ETV5-AS1	681	2759.51	1457.11	1150.96	9619.34	12648.9	0.0118963
PPP1R2	54663.3	45747.8	54741.8	59097.5	109721	122195	0.00364586
RNU6ATAC24P	706.222	635.937	1343.18	682.052	5250.32	4339.59	0.00505333
RNF168	24980.6	27255.1	35336.6	42525.6	86958.7	119296	0.0204921
AC055764.2	284.597	384.41	811.92	274.857	3173.7	3179.62	0.00177299
AC092574.2	759.681	513.057	842.83	917.102	1788.46	1909.67	0.00372333
AL645924.1	0	0	0	0	322.179	242.084	0.0050246
AC093323.2	0	0	0	47.1706	580.978	436.546	0.00621686
AC097382.2	88.6884	109.81	84.339	107.066	494.507	495.428	0.000108973
CPEB2	47278.1	46777.5	70073.2	65905	207591	175968	0.00290613
PCDH7	9776.07	4660.89	5018.41	4066.76	25987.3	21757.4	0.0107607
NSUN7	0	9.07905	19.1761	19.4748	104.94	90.116	0.00182
AC027271.1	156.295	844.441	891.781	452.838	2556.3	3055.82	0.0165264
THEGL	319.041	311.23	455.092	410.829	1067.34	831.701	0.0144852
AC114801.3	0	242.518	512.228	520.209	2002.24	2407.17	0.00331674
AC105917.1	0	0	0	0	27.9162	20.9762	0.0050246
RN7SL552P	0	0	0	0	256.809	192.966	0.0050246
AC106881.1	0	0	0	0	21.2915	15.9984	0.0050246
DAPP1	0	9.43838	19.935	0	155.847	210.786	0.00820722
AC096564.1	0	13.8515	0	0	137.23	154.672	0.00086286
TUBB8P3	0	0	0	0	88.2681	66.3245	0.0050246
AC104619.1	0	0	143.684	72.9612	449.314	422.017	0.00161589
RAB33B	9556.75	9715.49	13073.1	17443	42643.2	51341.3	0.00477954
AC104791.2	0	0	0	18.2331	84.2131	84.37	0.00262948
AC097372.4	0	0	0	0	377.018	283.29	0.0050246
AC095055.1	2227.17	1079.89	4480.27	2192.31	12418.2	10383.7	0.0101612
FAM160A1-DT	0	0	0	0	197.987	297.534	0.0136378
FAM160A1	328.625	252.402	753.698	644.091	1667.07	1587.39	0.000511795
AC080078.3	0	0	0	0	1530.87	1610.41	2.97804e-05
FHDC1	101.226	110.684	206.274	328.198	1548.1	1559.06	0.000163092
AC022272.1	736.216	1049.66	3383.87	2429.32	8392.4	10144.5	0.00418881
RNU6-853P	0	0	0	0	662.424	995.487	0.0136378
LRRC14B	0	0	0	0	45.06	33.8579	0.0050246
AC091891.1	0	0	0	0	206.045	232.232	0.000388773
IRX2	25779	17276.9	88360.3	82580.9	190855	193896	8.44279e-05
LINC01018	0	0	0	78.5194	423.1	605.555	0.0135222
LINC02142	0	0	0	0	122.841	92.3025	0.0050246
C9	32.3077	0	30.7233	46.803	1176.92	1082.86	0.000174356
ANXA2R	1358.58	1223.37	1291.95	2373.32	37994.4	38013.1	6.13955e-06
DEPDC1B	4508.99	10669.4	8027.83	14176.9	33651.8	43659.1	0.018761
CAB39P1	0	466.584	394.193	300.251	2003.11	1620.91	0.0134939
AC122718.2	322.64	145.265	153.408	77.8994	5876.63	4776.15	0.00228043
LINC02065	0	0	0	0	882.839	852.895	9.42552e-06
HMGN1P12	0	0	0	0	363.484	273.121	0.0050246
LINC01336	360.681	757.832	800.316	1045.01	2502.67	2753.59	0.00467015
AC008897.3	0	533.239	375.422	285.954	6016.67	4961.98	0.00265508
AC106818.1	0	0	0	0	21.8628	16.4277	0.0050246
EIF3KP1	726.677	327.178	276.416	421.084	3565.58	4790.02	0.00892431
LINC01848	0	0	0	0	410.498	411.263	1.48196e-09
MCC	6813.8	4709.61	17329.7	12060.2	52219.6	43242.2	0.00469447
SEMA6A	617.848	681.734	984.763	764.788	3208.85	3028.48	0.000426882
2019-03-03	3571.34	4028.17	12534.4	10596.2	34379	26963.5	0.00714757
KDELC1P1	0	0	0	0	6059.27	5117.62	0.00108128
GDF9	87.2278	157.093	193.55	210.606	2140	2371.38	0.000352752
CXXC5-AS1	165.234	223.184	0	79.7895	491.364	646.118	0.0124948
AC244517.3	0	0	0	0	57.3922	43.1243	0.0050246
PCDHGB9P	41.5063	186.877	197.354	240.515	617.147	533.281	0.0148387
ARHGAP26-IT1	0	0	0	0	182.679	274.529	0.0136378
POU4F3	0	0	76.7042	77.8994	179.897	225.29	0.00373305
ADRB2	18054.5	20110.1	15141.5	16754.7	48378.3	43559.7	0.0015867
IL17B	0	0	0	0	292.648	307.853	2.97804e-05
AC112191.3	0	0	0	0	255.882	192.269	0.0050246
CDC42P5	0	0	0	0	128.172	192.617	0.0136378
AC106795.3	174.296	0	0	252.497	1166.2	876.283	0.0200841
AC106795.2	1274.78	1359.37	319.016	939.562	2992.79	3223.25	0.00596179
AC136604.2	436.45	1288.21	1199.02	913.277	6597.62	5390.87	0.00582144
FOXO1B	0	28.1112	0	211.048	4084.73	2929.74	0.00851081
IRF4	452.614	160.116	614.882	562.017	3376.92	2266.51	0.0226347
SERPINB9P1	65.3014	88.2036	0	31.5332	436.927	328.306	0.00839328
TUBB2A	23628	19362.6	38166.2	58781.1	999903	969139	1.38699e-05
TUBB2B	217.274	58.6952	123.971	356.725	14860.8	21216	0.00969487
AL136309.2	83.7418	282.778	318.54	788.539	2708.17	2549.49	0.0028582
AL359378.2	0	0	0	0	190.025	214.176	0.000388773
RNU1-11P	0	0	0	0	432.191	649.495	0.0136378
RBM24	1882.44	1346.1	3922.47	3863.28	14612.2	14922.9	3.06748e-05
AL022068.1	156.838	243.228	215.434	269.28	751.417	584.082	0.0172918
E2F3-IT1	0	0	0	0	354.397	266.293	0.0050246
HIST1H3C	0	313.327	441.189	448.064	8277.88	5701.65	0.0123264
HIST1H4C	0	197.36	833.696	317.507	5865.87	5264.64	0.000855341
HIST1H2BG	621.512	615.624	886.549	720.29	11227.9	7811.72	0.0123722
HIST1H2BH	1064.48	770.996	440.118	581.069	2133.26	2352.68	0.00347531
HIST1H2AH	246.357	332.758	0	237.925	1098.9	1238.57	0.00569006
HIST1H4K	0	0	0	0	908.709	1365.6	0.0136378
HIST1H2AL	242.595	0	0	585.732	3967.8	2981.39	0.00985841
HIST1H2BO	0	788.662	237.964	483.344	2604.49	2935.51	0.0109485
AL662890.2	134.471	60.5441	127.876	324.672	699.796	826.296	0.0135896
LINC01623	0	0	0	0	22.8791	17.1913	0.0050246
RN7SL471P	0	0	0	0	237.055	178.122	0.0050246
TRIM31	0	0	0	0	20.0507	15.0661	0.0050246
MCCD1	0	0	0	0	74.2192	55.7681	0.0050246
MPIG6B	0	14.6155	0	47.0261	1013.6	743.48	0.00698786
LY6G6C	0	0	0	0	257.042	241.426	5.63613e-05
HSPA1A	22615.9	21160.3	22638.7	40772.7	355424	465621	0.00539912
HSPA1B	20724.4	22305.7	30820.9	51407.6	463457	574605	0.00277068
BRD2	89362.6	89613.4	244140	228982	1.37405e+06	1.28311e+06	0.000111263
AL031577.1	477.895	107.583	227.229	115.385	1954.07	2536.12	0.00895724
HSPE1P11	0	0	0	0	1143.21	1030.81	0.000252396
RNU1-88P	0	670.715	0	0	2768.72	2496.49	0.00543442
AL121574.1	227.542	204.896	216.383	0	845.815	889.761	0.00659981
GUCA1B	342.642	462.811	896.054	496.372	1846.81	2249.01	0.0117618
VEGFA	37334	52950	58830.4	60522.3	150143	141622	0.00153083
HDAC2-AS2	153.717	149.066	67.467	114.197	712.046	753.004	0.000239053
PLN	47.6462	0	45.3095	23.0078	283.376	266.16	0.00254518
Z99129.1	0	673.345	355.547	541.63	10006.5	12113.7	0.0020201
PKIB	83.3392	50.03	26.4174	53.658	392.397	387.956	0.000478662
SGK1	83460.7	78191.7	81853.8	53323.1	473321	373508	0.00575738
AL445190.1	0	0	0	0	246.109	184.926	0.0050246
SMIM28	0	0	0	0	82.8998	62.2907	0.0050246
HYMAI	53.1883	59.8685	101.16	102.736	1680.54	1842.14	0.000202927
AL023806.3	246.812	444.497	704.124	629.965	2175.66	2737.77	0.00617601
SAMD5	1961.11	1426.33	1707.13	2148.95	5719.69	7348.33	0.0111648
ZC3H12D	0	31.8771	40.397	61.5397	242.125	355.954	0.0186605
AL355297.4	381.665	584.258	217.769	479.184	2213.21	2046.77	0.00223895
FNDC1-IT1	0	0	0	0	137.363	103.214	0.0050246
AL445307.1	0	142.61	451.816	229.428	7535.34	7342.96	2.11242e-05
DLL1	1684.56	2062.46	3175.78	4352.68	229732	161641	0.00943908
AC093627.3	0	523.485	1105.66	1042.68	3457.53	4732.03	0.0129272
PDGFA	1929.31	2895.5	7469.82	13564.2	106379	124236	0.00117372
AC092171.3	863.131	194.307	923.402	868.324	6764.42	5424.3	0.00472625
AC092171.5	2125.41	956.943	1443.7	1759.43	10383.6	8763.35	0.00357771
DAGLB	10418.5	12193.1	15782.8	18812.1	42027.6	38833.6	0.00127603
AC005532.2	511.206	1035.74	972.272	617.139	3040.4	3284.04	0.0051017
AC004520.1	202.42	273.412	320.822	228.075	5668.34	5163.78	0.000230881
HOXA-AS3	175.757	187.04	455.829	324.052	1366.03	1776.18	0.0079074
HOXA5	4915.01	3419.98	12534.7	9062.07	36249.4	28111.3	0.0095011
HOXA6	1112.92	835.131	1763.9	2615.42	11914.3	9532.66	0.00465372
HOXA9	10764.7	13278.8	29662.7	30793.7	98070.4	91694.7	0.000178516
HOXA10	17386	13768.2	30767.7	35196.4	66309.5	83903.4	0.00912587
AC006023.1	0	0	0	177.755	3283.98	3290.1	3.78008e-05
AC006001.1	0	0	0	0	299.069	337.079	0.000388773
KCTD7	4020.29	5367.85	4889.77	5276.33	10362.5	10947.4	0.00401904
TYW1B	438.95	645.599	1029.64	1413.09	4960.25	6636.89	0.00919168
AC211476.2	269.322	545.666	256.114	650.262	2903.25	3084.18	0.00181229
TRIM74	0	0	0	0	48.1844	36.2057	0.0050246
SNRPBP1	0	0	0	0	251.345	188.86	0.0050246
ABCB1	689.68	214.407	218.619	261.673	2820.03	2651	0.00211189
LRCH4	2858.25	4607.71	5078.16	6423.04	23840.7	17797	0.013263
ACHE	102.214	149.567	97.2012	160.413	417.943	413.964	0.00453134
NAT16	24.6293	77.6234	70.2643	11.8932	549.31	426.509	0.00778798
AC005086.1	0	0	0	0	88.4885	132.98	0.0136378
AC005070.3	1044.92	1930.52	1439.12	1322.35	5759.28	7165.55	0.00785844
DOCK4	5264.88	5203.8	11464.1	13424.4	35794.1	36973.9	0.000121754
IFRD1	18039.4	23070.7	25980.2	26667.8	99263.2	89769.4	0.000782235
LSMEM1	514.954	761.8	629.614	2237.98	70879.3	98770.8	0.00800684
AC073346.1	0	0	0	0	65.3868	49.1315	0.0050246
ST7-AS2	0	0	0	0	24.7311	37.1658	0.0136378
AC000123.2	1861.3	2979.66	5310.06	2896.13	15990.1	12592.6	0.0123411
AC000123.1	2956.28	5407.31	5271.19	6156.32	22252.8	19507.5	0.00295407
FSCN3	0	0	0	14.3244	110.267	82.854	0.00790214
AC018638.6	75.2486	271.039	429.35	290.693	1230.74	924.774	0.0211658
FLNC-AS1	1876.1	6220.01	3892.57	2553.12	28909.6	30011.5	0.00133804
AC025594.3	482.734	326.018	573.825	699.319	2422.46	2292.14	0.000494458
AC007938.3	1989.44	1998.15	582.115	1995.25	11832.2	11797.2	0.00060616
AC008264.2	0	34.5155	24.3003	49.3578	341.953	371.14	0.000870568
AC013429.2	0	0	0	0	90.7546	68.1928	0.0050246
SVOPL	0	0	0	0	11.2471	8.45106	0.0050246
JHDM1D-AS1	7811.47	3264.52	5218.92	3714.03	33861.3	25532.8	0.0124228
TMEM178B	62.6295	16.1133	0	12.9613	286.018	209.915	0.0132144
RN7SL521P	0	578.125	610.535	0	3579.76	2869.15	0.0113031
TMUB1	19591.1	17919.6	17318.9	23949.2	71303.5	60988.3	0.00416746
RN7SL76P	0	0	0	318.606	2452.57	1658.57	0.0167201
AC004898.1	0	56.0388	0	60.1025	462.659	486.697	0.00159523
LINC01022	0	0	0	0	179.897	135.174	0.0050246
ZFX-AS1	0	0	217.421	220.808	679.898	766.31	0.000555022
ARX	0	0	0	0	22.8864	34.3936	0.0136378
AC092198.1	0	79.758	134.767	188.192	1027.24	1029.15	0.000248429
BCOR	23968.9	19242.2	56293.9	49061.4	258348	221212	0.00146135
KDM6A	18603.3	14707.4	44106.7	34108.1	97944.3	71648	0.021437
PIM2	7942.12	9577.06	30867.3	32698.9	92571.8	78200	0.00219684
AL591212.1	0	0	0	0	115.251	86.5993	0.0050246
AL139397.2	0	0	0	0	91.8126	137.976	0.0136378
GCNA	684.573	936.519	1527.35	1907.15	4658.73	6515.75	0.0170728
RPL7P53	0	0	0	0	95.9125	72.0684	0.0050246
PCDH19	302.946	180.397	418.194	292.578	893.62	949.876	0.00545806
AKAP17BP	35.0644	0	66.6895	0	469.227	450.514	0.00128546
XIAP-AS1	0	0	0	0	147.053	110.495	0.0050246
AL121601.2	0	121.431	0	65.1182	501.268	677.973	0.0146661
BCORL1	4125.52	4842.3	8526.72	10219.9	51484.1	40536.7	0.00494746
DUSP9	103.033	355.653	359.261	663.379	2144.76	2359.8	0.00296847
AC019270.1	0	0	0	0	20.3209	15.2691	0.0050246
AP006248.3	0	0	0	0	238.651	179.322	0.0050246
AC087821.1	168.148	0	159.902	243.59	2125.13	2630.05	0.0031055
TNFRSF10D	107062	91541.8	201804	214786	824708	879985	0.000133204
NEFM	10663.5	4879.48	11961.7	6946.24	26290.5	26355.8	0.0166005
AC102945.2	7039.87	8995.69	13835.6	9065.25	54580.1	42209.8	0.00887805
RPS20P22	940.379	846.79	619.104	523.959	4624.9	3151.87	0.0207692
AC090186.1	166.678	150.09	158.504	160.974	495.66	651.766	0.0115243
RNU6-13P	0	0	0	1290.8	5299.39	3981.95	0.0158316
AC021321.1	1199.25	1504.14	1629.19	2771.41	10507.7	9857.38	0.000925398
AC022893.3	0	0	0	0	486.586	365.619	0.0050246
C8orf89	0	0	0	0	430.877	323.76	0.0050246
RDH10	6844.56	7179.84	9763.34	11429.6	58224.7	46902.8	0.00393018
RDH10-AS1	50.1657	135.519	0	157.459	2815.78	2606.18	0.000264343
IMPA1P1	0	0	0	0	72.5479	54.5123	0.0050246
CA3-AS1	0	0	0	0	56.3877	42.3696	0.0050246
AC103760.1	113.975	153.948	108.385	27.5185	338.933	350.176	0.0102422
RPL19P14	0	0	0	0	123.483	185.57	0.0136378
AC107909.1	0	0	0	0	357.375	537.061	0.0136378
MIR599	0	0	0	0	746.098	560.616	0.0050246
AP005717.1	0	0	0	0	109.325	109.529	1.48196e-09
AC009908.1	0	104.189	220.059	111.744	1548.33	1034.15	0.0189315
TMEM75	308.259	158.617	376.896	212.649	2226.23	2410.78	0.000630536
AF230666.2	0	0	0	0	97.7646	73.4601	0.0050246
AC105118.1	0	315.631	0	84.6297	8859.92	9496.47	0.000112035
MAFA-AS1	0	102.939	0	552.021	8498.72	12388.7	0.0118402
MAFA	0	34.2857	579.325	661.896	40195.1	29309.2	0.0068649
DGAT1	16570.8	14495.6	17031.1	17998.6	74928.6	63688.5	0.00229197
AF186192.3	0	0	0	0	74.8462	112.478	0.0136378
AL137071.1	0	0	0	0	291.684	438.342	0.0136378
CSNK1G2P1	0	0	0	0	74.2192	55.7681	0.0050246
MTND4P14	0	31.7029	0	68.0037	523.481	550.679	0.000856002
ACER2	894.611	863.118	1296.36	966.85	2882.05	2736.7	0.00176814
AL158206.1	921.863	1092.26	2214.7	1710.34	4977.78	4526.3	0.0019918
MAP1LC3BP1	0	0	0	0	94.5058	71.0114	0.0050246
UBE2R2-AS1	147.357	530.767	1261.17	1138.51	10078.7	10948	0.000215217
RNU4ATAC11P	0	0	0	0	562.534	422.687	0.0050246
SIT1	0	0	0	0	160.24	200.673	0.00251186
FAM189A2	213.714	192.444	293.558	470.132	1271.06	968.337	0.015165
ABHD17B	32091.5	24110.4	92564.1	70854.8	202985	149408	0.0186724
PCA3	0	0	0	0	90.3612	67.8972	0.0050246
TLE4	33969.3	23321.6	63909.2	49108.9	152771	112626	0.021485
RASEF	114.712	71.0157	218.173	138.483	618.289	552.691	0.00329883
SEMA4D	148.127	121.259	128.057	130.052	465.521	338.508	0.0224998
NUTM2G	122.043	98.9073	23.2116	106.08	526.242	422.687	0.00891736
KRT8P11	0	0	63.1368	64.1205	1431.41	1965.67	0.00713527
ACTL7A	0	0	0	61.6312	616.754	463.428	0.00676646
C9orf152	161.758	233.055	215.355	265.577	4449.5	4355.38	6.62107e-06
OR2K2	0	0	0	82.5063	190.536	190.891	0.0217536
FAM225A	0	0	0	0	11.6196	17.4618	0.0136378
MIR600HG	127.46	150.642	90.9068	223.115	1255.55	1753.33	0.0116483
CRB2	0	13.5221	42.8403	43.5078	256.769	176.158	0.0155767
MIR601	0	1086.73	2295.3	0	7177.65	8764.07	0.0153629
WDR38	68.7383	0	0	0	1379.77	883.163	0.0187227
PBX3	17724.9	19088.6	28626.7	40610.3	86748.5	102284	0.00499111
SH2D3C	0	9.21351	19.4601	9.88163	91.2805	91.4506	0.000957086
AL157935.1	37.8333	119.238	0	164.423	618.788	486.09	0.0223823
LHX3	0	0	0	0	22.9457	17.2414	0.0050246
DNLZ	788.435	614.395	865.118	1391.11	5838.98	5149.68	0.00160414
AL355987.5	1159.85	1253.31	2647.14	4928.7	8622.79	10885	0.0158004
AL355987.4	307.903	455.498	836.58	1285.04	4888.79	7162.57	0.0170698
TPRN	7608.62	7100.68	15439.1	19776.4	69524.9	55613.2	0.0051676
TUBB4B	517257	443939	699074	827385	2.3406e+06	2.14997e+06	0.000719498
FAM166A	0	0	251.706	587.944	43920.8	27294.6	0.0211298
STPG3	177.542	53.2908	0	228.621	4751.69	2975.34	0.0222887
ODF3	0	0	0	0	91.1631	119.875	0.00443999
CDHR5	73.8497	55.4167	117.047	142.645	988.248	1196.36	0.00210995
AP006621.1	0	0	0	116.259	626.459	537.965	0.00402231
IGF2	68469.9	76606.6	89027.6	128561	228775	259988	0.00745096
KCNQ1OT1	81.1254	166.707	123.633	106.976	1236.39	1461.8	0.00170695
KCNQ1DN	0	0	0	0	64.8484	97.4539	0.0136378
AC011092.2	0	0	0	0	120.954	181.77	0.0136378
ADM	150937	188760	889465	718645	1.89345e+06	1.45303e+06	0.0101784
CTR9	77770.2	76489.9	83133.5	97631.2	196263	220398	0.00255256
AC009806.1	1102.2	744.377	1048.14	709.65	4916.48	4823.03	0.000458749
RASSF10	0	0	0	18.197	308.171	210.508	0.0125087
AC100771.1	0	0	324.962	330.025	762.143	1145.35	0.0195235
AL139174.1	0	0	102.33	207.849	639.994	961.78	0.0199693
ZNF408	13381.1	10640.8	45332.2	33923.1	115415	87864.5	0.0113527
AC090589.2	0	0	0	0	213.492	160.417	0.0050246
BTBD18	89.7177	94.2535	199.075	101.088	444.663	467.766	0.00574793
AP001363.1	0	975.585	1030.28	871.942	6443.57	6657.32	0.00116945
AP001458.1	3108.91	2332.92	3941.93	500.419	10786	13314.6	0.0190602
GNG3	0	97.3373	102.794	313.187	2089.41	1630.36	0.00567674
NXF1	50579.1	58165.3	116734	100112	525999	382027	0.0122126
SLC3A2	171365	116516	212513	197758	509844	486445	0.00148041
RNU6-45P	0	802.35	0	430.267	3312.12	3484.2	0.00586776
AP003774.1	0	0	0	0	30.2903	22.7601	0.0050246
PYGM	95.7037	77.5611	18.202	55.457	882.256	705.695	0.00335486
MIR194-2HG	0	0	0	25.2473	136.045	131.43	0.00181461
AP003068.4	237.756	267.617	678.287	631.451	25276.2	20652.6	0.00194322
SLC22A20P	23.9367	86.2179	91.0514	115.588	355.909	361.03	0.00299051
CDC42EP2	47155.6	36324.8	100122	88019.7	250245	193350	0.0106923
SSSCA1-AS1	687.312	1149.4	840.35	995.684	3576.81	3044.13	0.0060047
KCNK7	243.992	219.71	290.033	412.373	1405.8	1840.03	0.00834931
SNX32	1177.93	1450.34	1531.65	1601.95	5593.85	7170.97	0.00736114
RBM14	42136.6	44888.3	64641.9	76267	207471	172830	0.0043897
AP003419.2	0	162.906	172.039	786.237	2958.91	2324.38	0.0113235
RN7SKP239	323.186	727.555	2458.7	2653.07	7448.34	6318.81	0.00225696
RNU6-46P	0	0	0	860.533	1987.27	1990.97	0.0217536
SHANK2-AS1	0	0	0	0	62.9479	70.9483	0.000388773
IL18BP	1543.79	4021.5	6396.63	5623.03	13034.7	15547.6	0.00930781
AP000593.1	0	0	127.338	129.322	298.649	448.808	0.0195235
P2RY2	0	0	0	0	24.7743	37.2307	0.0136378
AP003717.1	0	0	0	0	50.1978	37.7185	0.0050246
AP003119.3	409.38	573.436	1795.12	2536.95	9147.36	7483.13	0.00373143
B3GNT6	0	0	0	0	215.931	324.5	0.0136378
OMP	775.122	436.237	184.277	280.723	2449.08	3355.72	0.0123907
RN7SL225P	0	0	0	0	237.85	178.72	0.0050246
AP002364.1	140.786	101.419	80.3288	203.951	1507.18	1368.43	0.000697821
AP001273.1	695.692	1634.23	1984.72	1928.01	5644.26	6606.63	0.00542539
AP002383.4	61.629	27.7477	0	59.5198	412.355	378.697	0.00215897
MIR34B	0	0	0	0	843.801	634.03	0.0050246
AP002373.1	130.782	0	0	315.765	3208.53	3798.96	0.00182493
SIK3	20464.9	13856.5	45772.2	36434.5	93084.3	76951.8	0.00789292
AP001267.2	0	0	0	0	271.829	204.251	0.0050246
AP003390.2	0	0	0	0	2028.75	2762.97	0.00627474
AP000866.2	309.948	251.191	353.697	419.076	2949.46	2320.11	0.00462417
AL713922.2	0	119.904	253.253	192.899	1088.93	1115.75	0.000636016
IDI2	0	0	0	67.7535	1616.82	1371.63	0.00115246
IDI2-AS1	0	67.2817	71.0536	36.0804	2166.37	1377.38	0.0197656
CALML3-AS1	0	0	0	0	29.8	33.5875	0.000388773
PFKFB3	69766.3	52446.1	94712.7	70691.8	250118	228078	0.00236187
SKIDA1	1451.44	1108.38	1434.39	1958.36	3628.6	3926.82	0.00585794
GPR158	0	11.112	23.4699	71.5069	1027.5	820.317	0.00296765
RNU6-598P	0	0	0	0	675.041	507.224	0.0050246
EEF1A1P39	0	0	0	0	1417.59	1704.27	0.00139615
AL391839.2	248.93	224.155	1183.61	1081.85	5366.84	4449.8	0.00222207
AL392046.2	0	0	0	0	61.0502	45.873	0.0050246
FZD8	17435.6	6859.6	32936.2	24493	203950	165815	0.00327115
AC010864.1	1640.53	1221.58	2100.1	2376.58	4737.8	4758.38	0.00106568
FAM35BP	0	11.8253	0	0	39.052	44.0153	0.00774117
LINC00843	402.278	845.233	1275.17	1230.28	3688.52	3295.89	0.00262083
RNA5SP317	0	1480.2	2344.77	3175.07	8554.4	9182.51	0.00334021
SGMS1	16698.2	13774.4	14948.6	17730.8	42181.4	43765	0.000916656
AL590502.1	0	0	0	0	140.355	210.925	0.0136378
AC022022.2	0	0	0	0	196.887	295.881	0.0136378
PRELID1P3	0	0	0	0	110.232	82.8282	0.0050246
TIMM9P1	0	0	354.158	179.838	830.617	624.124	0.0158758
MRPL35P3	261.923	117.928	0	0	584.17	438.944	0.0195278
AL357037.1	0	0	0	0	220.122	330.798	0.0136378
RNU6-529P	916.731	412.748	871.773	442.678	3407.66	2560.51	0.020269
CPEB3	974.084	1164.11	2493.04	2607.38	6365.55	6368.45	2.35789e-05
HDAC1P1	0	0	0	0	49.0514	36.8571	0.0050246
ACSM6	0	0	0	0	25.2509	18.9735	0.0050246
AL353719.1	331.042	99.3652	104.936	213.141	2953.31	2280.75	0.00567658
MIR1307	0	0	0	0	475.7	714.88	0.0136378
SORCS3	0	7.44722	0	0	24.5938	27.7196	0.00774117
AL353740.1	0	0	0	0	123.268	92.6236	0.0050246
AL158212.4	0	0	0	0	110.232	82.8282	0.0050246
PLEKHS1	0	0	0	0	52.4838	49.2952	5.63613e-05
NANOS1	356.012	374.011	1218.79	1123.17	5858.09	4468.04	0.00667836
AC012468.1	0	0	0	0	164.836	247.714	0.0136378
AC010998.1	0	0	0	0	75.1636	112.956	0.0136378
AL731571.1	755.273	1629.09	1002.19	1577.59	7573.69	5612.36	0.0149726
PRAP1	0	0	0	0	145.992	164.548	0.000388773
PTPN6	0	0	18.1003	36.7647	283.008	191.386	0.0150493
SUPT4H1P2	0	0	0	0	200.791	150.874	0.0050246
AC078950.1	0	0	0	0	57.9079	43.5119	0.0050246
ELOCP31	0	0	194.142	0	455.328	456.176	0.0207761
AC063924.1	0	0	0	0	105.318	79.136	0.0050246
AC004466.2	1293.37	748.705	1405.65	2676.66	50824.3	32925.3	0.0181605
LINC02354	0	0	0	0	225.252	225.672	1.48196e-09
AC004801.4	0	0	0	0	22.7761	17.1139	0.0050246
DDN	406.893	251.898	1088.26	884.176	2930.46	2542.89	0.00224193
DHH	49.2459	88.6896	46.8308	23.7802	256.279	220.077	0.00645954
ERBB3	55.0589	94.2007	41.887	58.492	343.836	362.931	0.000923117
LRP1-AS	0	293.009	618.87	628.512	4273.72	3211.27	0.00749117
AVPR1A	31.9772	0	30.409	7.7207	689.418	616.274	0.000506977
MIR618	0	0	0	0	723.258	1086.91	0.0136378
AC125612.1	0	0	0	0	376.018	282.539	0.0050246
AC012555.2	0	103.936	0	111.473	2402.69	3352.84	0.00852417
NUAK1	11604.6	11509.3	20311.5	20273.2	67531.6	66489.6	1.91325e-06
AC079174.1	305.577	963.078	1743.55	442.678	4089.19	4438.21	0.0173692
AC007569.1	110.99	349.802	105.546	0	1567.76	2356.02	0.0192837
FAM222A-AS1	0	0	0	43.1072	2521.92	2244.04	0.000379493
ATXN2-AS	982.887	1416.11	560.811	569.549	4530.43	4063.02	0.00141048
AC073575.1	0	288.092	152.121	154.492	1070.33	1340.4	0.0111011
SDS	63.4331	42.8401	60.3223	107.209	235.793	301.196	0.0146037
LHX5	0	0	0	0	181.451	153.385	0.00106506
SNRPGP18	0	0	0	0	331.212	248.872	0.0050246
AC069234.1	0	0	0	0	243.154	274.058	0.000388773
B3GNT4	325.254	320.341	193.314	255.224	1556.62	1782.86	0.0010664
AC137767.1	764.078	860.044	1251.38	1311.87	2871.78	2964.08	0.000101983
AC068790.6	1478.14	332.758	351.412	1070.66	6593.43	5573.57	0.00717191
AC073592.5	0	81.2988	0	0	536.965	504.342	0.00120271
AC078925.4	0	0	0	0	41.2809	31.0184	0.0050246
AC117500.3	286.306	322.265	272.265	414.762	1064.25	1119.55	0.00191184
AC131009.2	0	0	117.746	0	276.153	345.835	0.0221914
AC073911.1	0	32.9944	0	0	108.961	122.81	0.00774117
AL355001.1	0	386.718	204.199	414.762	1277.1	1199.52	0.0188333
AL138688.2	0	0	59.9236	121.715	655.856	598.411	0.000673931
NUS1P3	0	0	0	0	82.2266	61.7849	0.0050246
MTUS2-AS1	0	0	0	0	27.6117	20.7474	0.0050246
LINC02344	0	0	0	0	110.061	82.6996	0.0050246
PHBP13	0	0	0	0	186.525	210.231	0.000388773
AL356863.1	0	0	0	0	65.629	98.627	0.0136378
MIR5006	0	0	0	0	644.357	968.337	0.0136378
AL137060.1	108.014	16.2106	136.955	191.248	1070.68	1045.86	0.000349887
SERPINE3	36.5567	148.133	69.5279	123.57	516.375	530.952	0.00538987
DHRS12	1514.62	986.379	823.053	692.211	3458.51	2749.8	0.0151415
AL138713.1	0	20.1529	0	0	632.257	525.084	0.00154566
AL159972.1	638.437	191.633	202.376	0	1898.55	1664.33	0.00930059
GPC6-AS2	0	0	0	0	120.748	181.46	0.0136378
MTND5P2	0	0	0	0	62.066	46.6362	0.0050246
ING1	10835.4	8238.41	15825.1	18716.7	110369	107909	2.52464e-05
AL390754.1	0	0	0	0	121.786	91.5095	0.0050246
LINC00454	0	0	40.5839	20.6081	126.91	119.2	0.00161589
PNP	46391.6	54551.7	57697.5	73768.4	269389	274978	0.000155703
LMLN2	251.273	161.618	170.678	104.003	800.595	822.139	0.00125478
AL049830.3	0	0	0	0	246.323	185.086	0.0050246
ATL1	4570.2	4331.96	4720.37	5100.14	25945.7	21486.7	0.00290376
RN7SL452P	0	0	0	0	243.572	366.038	0.0136378
AL591770.1	0	0	0	0	62.6696	47.0898	0.0050246
AL359792.1	0	0	0	0	184.102	276.668	0.0136378
RPSAP13	108.96	196.232	103.616	157.846	567.035	669.536	0.00614572
AL355073.2	0	0	0	330.618	1018.02	1243.02	0.0114808
DAAM1	3898.33	3979.21	5746.93	5746.22	12009.5	13856.6	0.00252171
HIF1A-AS1	2047.18	2238.46	3337.34	6990.51	15871.7	19767.7	0.0108718
HSPA2	70007.3	36661.9	70183.7	65244.5	337207	307631	0.00113039
AL133445.2	0	0	172.039	87.3596	537.983	404.24	0.0112587
AC007956.1	879.52	871.187	1003.67	1274.13	2615.47	3144.42	0.00678943
RPS6KL1	137.684	473.384	226.155	314.297	2047.19	2573.08	0.00658148
POMT2	8488	10740	12121.2	12995.5	47026.2	50571.1	0.000333262
STON2	214.247	83.6007	122.244	89.6631	679.592	750.008	0.00380829
SERPINA10	0	31.3785	33.1376	67.3078	233.156	184.926	0.0111844
AL163051.1	756.667	936.872	1139.3	1431.09	3703.35	3099.7	0.00553054
CCNK	8397.34	11405.1	9948.82	14405.2	55910.2	58526.1	0.000492442
CCDC85C	693.918	1540	1122.33	997.339	8542.56	7423.05	0.00191414
AL133368.1	0	0	0	56.5584	1828.58	2159.13	0.00109817
AL133368.2	0	0	0	119.271	1285.38	1379.76	0.000361803
DEGS2	0	9.61168	0	0	269.805	190.805	0.00913927
YY1	83367.8	63207.2	99034.2	99980.7	294564	270586	0.00090499
AL118558.2	0	0	0	0	297.812	223.775	0.0050246
AL118558.1	615.097	138.47	877.398	1188.09	2858.04	2448.18	0.00886965
AL161669.3	0	0	0	0	182.444	205.631	0.000388773
RNU4-68P	0	0	0	0	502.69	377.72	0.0050246
AL583722.4	266.313	179.856	126.626	0	890.941	892.601	0.00183463
AC116158.1	134.345	60.4872	85.1709	108.122	366.215	375.236	0.005056
FSIP1	1647.69	2080.1	2365.69	2792.58	7661.98	7922.91	0.000374135
CYCSP2	0	0	0	0	235.479	176.939	0.0050246
AC039056.2	1865.75	1344.05	2661.38	1982.09	11512.7	9484.4	0.00376944
AC090510.2	757.87	1569.62	1297.26	951.512	3267.89	3471.54	0.0141252
AC090519.1	190.299	214.2	0	137.84	636.641	584.675	0.00620339
AC025580.2	0	22.0925	116.655	94.7782	364.793	260.4	0.014222
RN7SL577P	0	0	0	0	233.925	175.771	0.0050246
USP50	0	0	47.543	48.2837	223.008	195.495	0.000691072
ONECUT1	74.2909	33.4486	70.6476	35.8742	220.923	235.168	0.00698901
AC011912.1	409.606	405.725	701.134	704.147	2350.87	2297.28	6.2638e-06
LINC00926	207.882	818.97	593.062	1003.84	6162.58	6401.48	0.000590165
MTND5P32	0	0	0	0	39.3337	59.1105	0.0136378
AC027237.4	137.378	247.411	261.281	132.676	3370.34	2839.43	0.00157942
AC009269.5	1515.34	1364.53	1681.19	1402.5	3849.08	3174.35	0.010668
AC020779.1	0	0	0	0	89.0444	66.9077	0.0050246
AC100827.2	0	71.9024	151.867	154.233	1127.9	847.498	0.00724207
AC113208.3	0	16.3278	0	17.5118	80.8817	101.291	0.0117082
RPL13P4	169.644	152.761	0	163.838	1261.2	1705.79	0.00903049
AC067863.3	0	0	0	0	580.978	873.091	0.0136378
MEX3B	3124.11	1800.05	7998.58	7722.32	191848	130876	0.0125585
AC021739.4	0	0	0	0	124.568	93.6003	0.0050246
MIR3174	0	0	0	0	814.705	612.167	0.0050246
MIR5587	5396.6	8909.12	17106.5	11292.5	54831.2	73356.1	0.0105415
PRR35	43.0235	0	0	20.7755	159.926	216.303	0.0163565
WFIKKN1	97.7245	35.1995	148.691	151.008	1394.92	1135.48	0.00271994
AL031710.2	396.15	416.178	2009.18	2104.25	30727.5	27809.5	0.000256728
AL031710.1	0	275.165	0	98.3729	757.258	796.602	0.01637
RN7SL219P	0	0	0	155.536	478.914	539.783	0.00931273
AC106820.4	729.989	687.913	710.334	696.808	1464.03	1744.94	0.00689379
ATP6V0C	254.579	544.452	1634.14	1290.8	17790.8	16603.3	0.000108321
AC093525.8	2060.25	2718.84	8580.01	8782.31	120579	98857.7	0.00202624
AC092117.2	57.4684	103.498	327.9	111.003	1025.38	1027.29	0.00349264
AC092117.1	762.72	567.941	920.592	1090.76	8658.18	7390.65	0.00131089
AC108134.1	0	0	0	30.0807	231.556	156.592	0.0167201
AC108134.2	509.84	918.198	2424.18	2092.66	25111	28480.5	0.000553807
AC012676.1	831.596	836.931	1814.22	1913.35	9600.89	7022.81	0.0105867
AC022167.3	223.279	0	0	107.819	2655.9	2619.27	0.000215535
AC027277.2	0	197.36	208.424	105.836	1140.59	1101.9	0.00260971
AC007014.1	0	0	0	0	580.978	873.091	0.0136378
BCAR4	0	0	0	34.6676	160.119	200.522	0.00642487
AC007216.2	248.281	111.786	236.105	719.352	3137.89	3051.27	0.00139135
AC007216.1	0	214.272	301.712	229.81	5189.17	3810.51	0.00735298
AC099494.3	55.3659	49.8557	105.301	53.471	699.738	680.423	0.000161208
AC009152.1	171.475	77.2046	0	331.212	3187.02	2203.14	0.0143142
ARL6IP1	97264.5	96729.3	95140.7	107687	280327	247523	0.0021693
AC002550.1	0	0	0	0	51.3991	38.6211	0.0050246
SMG1P3	590.257	579.833	1339.49	1444.57	4737.26	4234.01	0.000680418
MIR3680-1	0	0	0	0	3258.82	3060.84	5.63613e-05
SULT1A2	0	0	0	0	31.1557	23.4104	0.0050246
AC145285.7	557.544	725.191	1767.34	2123.93	5434.54	4844.83	0.00124981
AC009093.5	0	0	0	0	987.177	1038.47	2.97804e-05
SMG1P2	316.219	457.631	1439.12	807.12	3089.74	2460.42	0.016116
AC009086.3	378.333	127.755	539.669	867.79	7102	6657.32	0.000193533
SLC7A5P1	1952.96	1998.41	11143.1	16203.5	86718.3	56432.2	0.0218753
AC009088.1	343.361	515.315	1632.61	1160.64	33440.1	39832	0.00130298
PYCARD-AS1	0	117.605	0	42.0443	2136.09	1507.78	0.00993215
TRIM72	0	15.1503	10.6664	59.5793	1217.46	908.528	0.0059303
PYDC1	0	0	0	0	987.865	618.566	0.0199062
AC026471.3	0	0	0	0	122.629	184.286	0.0136378
AC027348.1	310.049	279.192	589.687	449.156	2535.52	3810.37	0.0202592
AC007728.1	0	0	0	56.5584	435.377	392.569	0.00125279
AC009166.1	0	264.43	0	283.605	2037.6	1968.49	0.00210634
AC007496.1	0	0	0	0	191.825	216.205	0.000388773
IRX5	10053.4	5944.73	28808.7	25179.6	349239	236715	0.0142643
LPCAT2	10727.2	13623.8	8177.96	13194.5	34720.3	47323.4	0.0209479
AC007336.1	99.6238	414.904	331.584	180.402	1814.57	1544.33	0.00652309
CAPNS2	93.8386	0	178.473	135.941	5441.52	5399.24	2.10697e-06
AC009107.1	0	0	0	279.021	3866.14	3389.18	0.000847314
AC010533.1	135.876	489.415	516.852	328.066	1346.88	1239.75	0.0182636
AC027682.4	241.571	217.529	459.448	77.7678	1676.2	2114.15	0.00944315
ESRP2	17.1382	177.475	114.084	115.862	853.661	622.291	0.0182199
AC020978.5	178.874	0	0	86.3762	664.909	699.456	0.00754855
RNU6-22P	0	0	847.331	430.267	2649.69	1990.97	0.0112587
AC140912.1	0	0	0	0	62.1204	46.6771	0.0050246
MAF	478.34	461.501	766.8	1471.7	6644.94	8306.38	0.00430311
AC092139.2	0	44.3448	187.323	142.681	1171.56	825.288	0.0121167
AC040169.3	311.569	350.701	592.578	677.037	6369.87	5743.57	0.000333124
AC025280.1	0	1650.99	1394.84	2301.93	20718.6	13724.3	0.0193721
AC092127.1	0	0	0	0	61.545	77.0746	0.00251186
FOXC2	102573	88259.4	121654	151325	450819	441414	0.000250659
AC093519.1	0	0	0	0	237.85	357.44	0.0136378
AC136285.1	0	0	0	0	97.9673	110.419	0.000388773
AC105429.1	0	64.3725	339.907	586.845	5155.18	5577.44	0.000202975
AC134312.5	569.383	313.327	481.297	274.948	2116.5	2014.42	0.00201296
IL17C	0	0	197.239	166.927	1233.58	811.044	0.0185763
AC138028.6	1608.3	1013.77	3670.62	3199.71	30561.3	19801.3	0.0213344
PABPN1L	0	0	0	0	107.883	121.595	0.000388773
AC092120.3	0	0	0	0	249.575	187.53	0.0050246
AC027455.1	0	0	0	77.5059	1193.25	1075.93	0.000455609
AC087392.3	108.65	513.641	671.588	839.449	3069.42	4309.24	0.0148027
MIR132	0	0	0	0	701.775	527.312	0.0050246
ENO3	821.897	2100.28	2049.03	2703.1	7348.86	5695.64	0.0210059
PIMREG	11550.2	16285.3	10534.2	14726.5	40750	54239.6	0.01707
AC004706.3	22.968	20.6821	0	22.1819	68.301	76.9818	0.0154761
AC120057.4	236.136	186.056	449.112	798.191	6276	6496.55	7.70818e-05
AC026954.2	0	0	0	0	82.7063	103.576	0.00251186
TMEM95	0	0	74.0722	0	4458.91	3132.86	0.00932457
POLR2A	139729	98500.6	190216	191092	914772	808026	0.000950686
DNAH2	5.53305	19.9295	5.2617	10.6874	123.404	101.998	0.00377281
HES7	561.424	413.631	970.711	1651.28	12521.5	12830	6.16464e-05
RCVRN	32.6395	88.1734	62.0777	78.8061	363.981	273.495	0.0158768
AC005703.6	358.691	387.591	341.1	623.547	1226.65	1522.82	0.0166288
RASD1	7854.1	3757.23	46369.6	95000.6	5.97142e+06	3.82767e+06	0.0177293
ALKBH5	131474	97343.2	97286.6	109453	435030	494386	0.00167637
TBC1D28	0	0	0	0	18.9163	28.4273	0.0136378
SNORD3B-1	0	0	239.22	121.474	2150.69	1475.5	0.0131056
SNORD3B-2	0	0	0	0	179.214	201.992	0.000388773
PYY2	88.6059	79.7876	337.042	299.507	1580.95	1237.42	0.00493955
PROCA1	868.702	1280.04	1295.47	1458.67	6047.27	5051.24	0.0035321
TLCD1	10326.7	7727.29	14799.5	11061.9	32601.2	25187.1	0.0220701
AC010761.2	0	0	0	0	94.0044	141.269	0.0136378
ALOX12P1	0	0	0	0	115.345	173.339	0.0136378
SH3GL1P2	352.458	476.071	418.967	212.747	1703.2	1624.34	0.00165226
MIR193A	4333.64	975.585	11333.1	17264.4	103903	85334.7	0.00264602
RNU6ATAC7P	0	0	0	0	558.105	419.359	0.0050246
AC090616.3	0	0	0	0	1659.38	1959.34	0.00103037
SH3GL1P1	434.123	616.447	254.051	322.512	1564.06	2238.54	0.020586
AC006441.1	654.508	2062.79	1244.82	737.459	9731.71	11334.2	0.00286093
TCAP	0	384.168	555.175	195.17	2270.28	3085.63	0.0138974
KRT14	0	0	0	0	31.0738	23.3488	0.0050246
KRT16	0	0	0	0	85.9143	64.5558	0.0050246
AC130686.1	0	17.407	0	37.3386	201.198	194.374	0.00259573
ZNF385C	0	0	17.4422	26.5709	68.1794	61.4758	0.00175316
AOC4P	0	0	0	0	22.3665	33.6122	0.0136378
AC109326.1	360.863	747.382	823.598	1603.16	21891.6	26649.4	0.00198179
AC003102.1	568.628	853.395	1351.86	1144.1	8349.1	6088.2	0.0104392
RN7SL258P	0	0	0	0	945.058	1065.17	0.000388773
AC103703.1	0	64.7447	136.749	69.4397	534.535	562.308	0.00182523
RN7SL405P	0	0	0	0	245.257	184.286	0.0050246
AC002558.1	118.73	106.913	112.907	0	882.681	928.543	0.000748356
TBX21	2735.46	1987	1318	1919.74	7565.16	7008.78	0.00201746
SP6	210.567	358.153	600.721	926.42	5809.5	4456.73	0.00603438
SUMO2P17	212.575	382.838	707.526	1077.83	3002.69	2315.59	0.0112577
AC015909.5	168.297	94.717	120.032	386.025	907.105	963.637	0.0112419
LINC00483	0	0	0	0	116.1	87.2376	0.0050246
WFIKKN2	0	0	0	0	124.945	147.531	0.00103037
TOB1	36343.4	35263.5	66640.7	88223.8	474085	417428	0.000846344
AC015912.3	2739.66	2590.35	4429.01	4498.02	80248.4	53870.7	0.014974
PPM1D	11284.3	10978.2	28777.5	30193.4	111462	102843	0.000221591
AC008026.3	0	0	0	0	41.5227	31.2001	0.0050246
PRR29-AS1	0	0	0	0	24.224	18.2018	0.0050246
ERN1	12172	9411.74	23392.2	20370.7	54979.8	47900.3	0.00253262
AXIN2	875.683	640.683	1544.04	1673.81	5072.5	3994.9	0.00735468
AC079331.1	0	0	0	0	413.463	266.293	0.0168372
AC134407.1	0	60.5441	255.753	0	799.767	826.296	0.00978439
MGC16275	37.8033	119.144	35.9494	237.312	10426.7	7834.62	0.00525389
FADS6	0	0	63.3795	144.826	2254.46	3015.69	0.00568507
AC022211.4	44.1185	79.4553	41.9548	85.2171	327.993	418.971	0.00872169
AC015802.6	33.7248	22.7763	64.1418	48.8559	275.795	235.491	0.0019938
RNY4P36	0	0	944.421	959.136	8859.92	8321.65	6.59061e-05
AC005837.3	666.713	1801.08	4121.11	2253.63	19082.9	14338.8	0.00980267
JMJD6	15541.3	17015	35770.6	35541.2	85710.7	90197.8	9.13935e-05
EIF4A3	97355.4	86162.6	99225.2	107259	432126	382535	0.001035
AC027601.1	698.229	1152.69	1267.61	1185.19	3366.22	2801.22	0.010013
AC027601.3	374.617	168.667	1424.98	452.245	7101.86	8370.7	0.00255345
AC110285.5	0	0	0	0	805.447	1059.12	0.00443999
AC110285.2	731.042	1481.14	2027.64	1706.22	6521.8	6874.27	0.00109513
AC110285.7	434.492	251.518	472.21	539.514	3691.63	2531.17	0.0173129
FSCN2	708.321	212.609	359.245	433.25	3826.57	2822.52	0.0122989
AC137723.2	0	0	0	347.024	2315.15	2007.23	0.00247904
AC068014.1	0	0	0	0	171.621	257.911	0.0136378
AP001033.2	2946.7	3295.4	3434.94	2799.95	15122.8	21664.5	0.016608
AP001357.2	0	0	0	0	99.83	150.024	0.0136378
CABLES1	2378.49	987.021	4332.92	3632.44	38528.8	26293.1	0.0150511
AC026634.1	0	0	0	0	2147.86	2420.84	0.000388773
AC110015.1	0	390.234	618.166	523.165	5477.04	6052.11	0.000500912
AC090241.2	0	0	0	0	69.2587	93.6734	0.0058816
SMAD7	31633.7	23509.2	89436.6	59717.9	585599	409667	0.0133072
MEX3C	49613.5	33641.7	72812.7	68008.5	244482	214892	0.0016318
AC104365.2	0	0	122.519	62.2142	2107.22	1871.25	0.000447188
AC064801.1	468.501	316.406	445.525	452.467	3831.31	3925.69	3.18704e-05
PHLPP1	8228.32	6043.04	23871.1	21211.4	76686.4	57814.3	0.00956338
AC009716.2	0	0	0	0	18.8258	14.1457	0.0050246
AC023090.2	90.3697	20.344	0	65.4576	268.737	277.651	0.0153088
KCNG2	44.0981	19.8546	0	21.2944	327.841	221.705	0.0172218
AL121890.2	0	0	0	0	152.429	229.069	0.0136378
LRRN4	0	31.8913	67.3584	85.5099	1026.85	910.064	0.000529238
JAG1	10814.3	8460.41	32711	28786.2	160488	134894	0.00184633
OTOR	0	0	0	0	64.4944	96.9218	0.0136378
INSM1	0	0	0	0	150.327	169.433	0.000388773
AL096677.1	585.627	738.281	891.051	1018.05	3221.79	3467.69	0.00043401
MIR3193	0	0	0	837.064	57992.2	49385.2	0.000956718
AL035071.1	894.791	1692.05	4467.27	3348.65	14601.6	21193.5	0.0171037
EFCAB8	0	9.46335	19.9877	30.4488	312.519	258.309	0.00197978
RPS2P1	0	52.2847	110.432	56.0762	258.999	259.481	0.00985198
MYH7B	84.1483	92.0108	68.5899	232.195	706.023	564.08	0.0152393
GHRH	0	0	0	0	124.35	93.4361	0.0050246
RNU6-1251P	0	401.175	0	430.267	2649.69	3981.95	0.020983
MATN4	77.2923	86.9999	0	93.3087	344.772	431.768	0.0128352
RBPJL	0	0	32.8138	16.6625	153.918	192.756	0.00384493
AL021578.1	1882.6	908.161	1534.52	1363.62	36089.5	26366.4	0.00762996
AL034418.1	110.86	149.741	105.424	0	412.089	557.357	0.0199791
SPATA2	11744.5	8987.26	26562.3	23666.2	63376.4	51674.5	0.0056707
FAM209A	83.8522	113.261	79.74	0	374.033	327.889	0.00831206
AL109955.1	0	139.369	117.746	89.6855	506.281	622.503	0.0119655
MIR646HG	0	16.7124	17.6493	0	96.5846	103.676	0.00465754
AL121832.3	566.886	638.085	906.644	1244.28	7873.35	7873.63	2.69315e-05
AL499627.1	0	0	0	0	64.7891	48.6824	0.0050246
AL357033.3	310.554	489.382	0	749.813	2424.21	2255.25	0.0138696
UCKL1-AS1	1005.81	1215.55	1283.7	1482.64	4466.85	3933.03	0.0019304
AC004449.1	660.554	396.543	1465.71	1275.89	9166.84	6395.95	0.0140526
AC012615.1	1027.53	1652.26	2024.07	3083.41	11185.7	13283.9	0.00289617
CSNK1G2-AS1	0	127.565	134.717	684.079	2317.01	2492.79	0.00433528
AC004678.1	513.132	646.89	780.748	396.457	1678.52	1834.53	0.010937
AMH	184.267	315.264	560.739	1103.36	3972.75	4364.44	0.00145373
JSRP1	97.7846	0	464.946	424.971	2362.64	2212.28	0.00016015
PEAK3	185.198	550.33	528.347	608.124	3139.18	2772.59	0.00207258
GADD45B	94626.5	117313	409050	343911	3.27192e+06	2.30574e+06	0.0115225
AC092068.2	0	0	0	0	165.994	155.909	5.63613e-05
AC016586.1	1115.09	1192.38	2253.36	2153.85	28185.9	18687.2	0.0171896
AC007292.3	0	0	0	0	3573.75	2237.75	0.0199062
AC007292.2	631.391	284.276	500.355	406.521	2112.3	2380.76	0.00348864
SAFB2	25482.2	25954.1	36458.1	39830.5	82476.1	83457.2	7.18403e-05
PSPN	1706.42	1284.15	1599.55	1589.16	5890	5719.41	0.000278863
TUBB4A	0	24.7696	26.1582	13.2829	245.399	245.856	0.00040918
AC011511.5	0	26.6702	225.323	85.8127	968.838	976.159	0.000903935
ICAM5	5052.58	4099.16	8286.53	9099.27	48886	34251.3	0.0152777
MIR4748	0	0	0	0	864.382	649.495	0.0050246
IER2	33890.4	42758.1	95593.1	97052.6	296969	275932	0.000240553
MIR27A	6111.54	8805.28	2324.73	7673.09	22717.7	21166.9	0.0125438
MISP3	607.519	492.351	539.211	528.055	4305.75	3054.34	0.0135106
CYP4F22	0	0	0	0	26.8076	20.1432	0.0050246
RN7SL146P	0	433.593	0	310.024	1431.91	1434.57	0.0161842
AC008764.6	829.444	1286.32	1051.69	1802.38	3768.35	3964.15	0.00851387
AC008764.10	0	23.4567	99.0868	0	2672.5	2793.89	4.61758e-05
HAUS8	3980.4	6121.17	7390.14	9577.15	24800.7	26220.2	0.00126739
AC010618.1	0	0	0	0	148.594	111.653	0.0050246
SLC5A5	0	0	0	0	19.4084	14.5834	0.0050246
AC010335.1	0	429.974	302.719	1614.04	17039.4	22850.5	0.00638865
BNIP3P24	0	0	0	0	127.252	191.234	0.0136378
AC025809.1	510.75	459.919	485.702	328.847	2531.4	2472.72	0.000140901
FXYD3	0	0	0	0	21.2595	31.9487	0.0136378
HAMP	31.6744	14.261	0	0	141.288	106.163	0.00875306
NPHS1	0	0	0	0	25.9679	19.5122	0.0050246
LGALS4	0	16.229	0	17.4059	160.785	120.813	0.0093087
SERTAD1	52676	47819.4	142473	155473	816353	681100	0.00200764
CYP2T1P	1978.89	700.049	1713.82	1586.95	18389.7	15634.1	0.0016904
CYP2T3P	0	52.5407	0	112.701	607.289	521.504	0.00526273
CD79A	253.733	228.48	361.934	214.418	801.696	779.566	0.00517429
BHMG1	0	15.615	0	0	51.5673	58.1214	0.00774117
RSPH6A	0	16.8535	0	18.0756	111.314	104.552	0.00381277
AC010331.1	327.629	590.045	1557.81	1028.35	5602.15	4209.44	0.0107513
FAM83E	0	0	107.55	72.817	616.586	884.484	0.0116958
SPACA4	0	0	186.552	0	729.211	876.684	0.006649
PPP1R15A	213552	161169	356649	281947	1.03225e+06	890863	0.00287422
LHB	185.486	334.053	352.78	89.5691	1516.87	1554.24	0.00289277
PTH2	0	0	0	0	154.421	116.032	0.0050246
BCL2L12	16693.1	12319.8	26143.8	29231.1	100530	69817.7	0.022297
ADM5	277.474	474.732	3483.03	2867.36	19803.3	15717.2	0.00371001
AC018766.1	0	443.448	561.969	856.088	3075.34	3411.19	0.00250814
AC010325.2	0	0	0	0	272.613	204.841	0.0050246
CLDND2	1072.16	594.128	1176.44	557.56	7786.92	5206.07	0.0221183
LILRB3	918.694	1183.45	1019.25	1146.03	2561.22	2466.2	0.00217
LILRP1	0	0	0	0	103.473	77.7497	0.0050246
FCAR	0	0	0	0	59.9149	45.0199	0.0050246
TMEM86B	399.368	784.629	932.193	859.059	2159.31	1723.91	0.0221477
UBE2S	12960.5	15489	23479.1	38739.7	209740	181954	0.00138082
ZNF580	21497.5	16982.1	25528.8	25191.2	87993.6	89443.5	8.31976e-05
AC010525.1	216.19	292.012	411.176	939.562	7393.31	6400.69	0.00120852
AC006116.4	843.717	664.779	1805.26	712.986	5018.01	6127.09	0.00858519
PEG3	1192.01	916.07	1026.06	1250.45	5997.01	4810.38	0.00521519
RNA5SP473	0	0	0	0	567.035	426.068	0.0050246
CASKP1	0	0	0	158.208	1705	1647.17	0.000248275
LINC01664	0	31.7029	0	0	157.044	118.003	0.0121644
LINC01311	1913.4	2851.81	10980.1	14082.4	32864.5	28343.1	0.00253246
LINC00896	0	80.6875	213.027	194.712	1132.47	1676.84	0.0161609
RTN4R	999.371	398.532	244.378	151.669	3502.57	2791.33	0.00863807
SLC9A3P2	0	0	0	0	35.0714	26.3526	0.0050246
AIFM3	70.6091	63.5819	100.72	59.6685	551.182	473.322	0.00182993
FBXW4P1	425.815	536.812	445.426	431.804	2057.68	2878.2	0.0146735
AC253536.6	862.805	1748.11	1914.48	1874.87	11973.6	9318.24	0.006425
ADORA2A	22.7379	30.7124	43.2456	87.8388	152.138	190.527	0.0196996
RASL10A	170.25	76.6531	161.901	123.317	379.711	404.194	0.013605
HORMAD2-AS1	0	0	63.0051	0	492.56	370.108	0.00781615
CNN2P1	207.712	0	0	0	1312.58	1044.29	0.00591307
APOL5	0	29.851	63.049	32.0157	690.063	777.767	0.000609202
FO393418.1	0	336.673	0	180.543	2223.66	1566.43	0.0165341
TMPRSS6	70.0686	178.77	310.951	191.733	711.919	574.076	0.0191272
MAFF	45131.6	30724.6	58548.4	49556	316527	255271	0.00408806
AL031590.1	0	0	0	0	31.3556	47.121	0.0136378
AL022238.3	215.214	1162.77	204.66	311.773	4799.95	4207.79	0.00469379
AC254562.1	0	282.406	0	0	2020.68	2102.31	0.000726206
Z95331.1	45.3764	143.012	384.437	368.515	2054.74	1827.36	0.000676402
MIRLET7BHG	1947.41	3492.21	4162.84	4107.14	8872.29	8461.12	0.00574487
Z98885.3	217.052	366.469	206.407	235.826	1855.69	1970.29	0.000346439
CU639417.1	495.943	482.312	3848.43	2787.6	56706.4	38896.7	0.0123676
FP671120.4	0	0	0	0	153.585	115.403	0.0050246
SCAF4	41086.2	36451.6	110776	98279.5	367549	315716	0.00164093
AP000265.1	0	24.0885	0	51.6706	596.627	478.191	0.00360774
SYNJ1	5871.62	9829.84	12077.4	18757.7	60585.6	59224.6	0.000959083
FTCD	518.309	350.044	328.593	570.094	3296.71	2525.4	0.00806897
MT-RNR1	861858	1.69233e+06	1.56914e+06	1.31823e+06	5.40213e+06	5.66634e+06	0.00229034

## Sheet: e. GO dICP0 ICP4 positive
Overlap Results
Collection(s):	BP
# overlaps shown:	20
# genesets in collections:	4436
# genes in comparison (n):	342
# genes in universe (N):	45956
Gene Set Name	# Genes in Gene Set (K)	Description	# Genes in Overlap (k)	k/K	p-value	FDR q-value
GO_POSITIVE_REGULATION_OF_GENE_EXPRESSION	1733	Any process that increases the frequency, rate or extent of gene expression. Gene expression is the process in which a gene's coding sequence is converted into a mature gene product or products (proteins or RNA). This includes the production of an RNA transcript as well as any processing to produce a mature RNA product or an mRNA (for protein-coding genes) and the translation of that mRNA into pr…	55	0.0317	1.13e-19	5.02e-16	0.160819
GO_POSITIVE_REGULATION_OF_BIOSYNTHETIC_PROCESS	1805	Any process that activates or increases the frequency, rate or extent of the chemical reactions and pathways resulting in the formation of substances.	54	0.0299	3.34e-18	7.41e-15	0.157895
GO_REGULATION_OF_TRANSCRIPTION_FROM_RNA_POLYMERASE_II_PROMOTER	1784	Any process that modulates the frequency, rate or extent of transcription from an RNA polymerase II promoter.	50	0.028	9.05e-16	8.03e-13	0.146199
GO_CELL_DEVELOPMENT	1426	The process whose specific outcome is the progression of the cell over time, from its formation to the mature structure. Cell development does not include the steps involved in committing a cell to a specific fate.	47	0.033	1.62e-17	2.4e-14	0.137427
GO_TISSUE_DEVELOPMENT	1518	The process whose specific outcome is the progression of a tissue over time, from its formation to the mature structure.	47	0.031	1.77e-16	1.96e-13	0.137427
GO_RESPONSE_TO_EXTERNAL_STIMULUS	1821	Any process that results in a change in state or activity of a cell or an organism (in terms of movement, secretion, enzyme production, gene expression, etc.) as a result of an external stimulus.	47	0.0258	1.44e-13	8e-11	0.137427
GO_REGULATION_OF_MULTICELLULAR_ORGANISMAL_DEVELOPMENT	1672	Any process that modulates the frequency, rate or extent of multicellular organismal development.	46	0.0275	2.82e-14	1.79e-11	0.134503
GO_SYSTEM_PROCESS	1785	A multicellular organismal process carried out by any of the organs or tissues in an organ system. An organ system is a regularly interacting or interdependent group of organs or tissues that work together to carry out a biological objective.	44	0.0246	4.31e-12	1.74e-09	0.128655
GO_POSITIVE_REGULATION_OF_RESPONSE_TO_STIMULUS	1929	Any process that activates, maintains or increases the rate of a response to a stimulus. Response to stimulus is a change in state or activity of a cell or an organism (in terms of movement, secretion, enzyme production, gene expression, etc.) as a result of a stimulus.	44	0.0228	5.29e-11	1.38e-08	0.128655
GO_NEGATIVE_REGULATION_OF_GENE_EXPRESSION	1493	Any process that decreases the frequency, rate or extent of gene expression. Gene expression is the process in which a gene's coding sequence is converted into a mature gene product or products (proteins or RNA). This includes the production of an RNA transcript as well as any processing to produce a mature RNA product or an mRNA (for protein-coding genes) and the translation of that mRNA into pr…	42	0.0281	2.01e-13	8.91e-11	0.122807
GO_REGULATION_OF_RESPONSE_TO_STRESS	1468	Any process that modulates the frequency, rate or extent of a response to stress. Response to stress is a change in state or activity of a cell or an organism (in terms of movement, secretion, enzyme production, gene expression, etc.) as a result of a disturbance in organismal or cellular homeostasis, usually, but not necessarily, exogenous (e.g. temperature, humidity, ionizing radiation).	39	0.0266	8.76e-12	2.99e-09	0.114035
GO_NEGATIVE_REGULATION_OF_NITROGEN_COMPOUND_METABOLIC_PROCESS	1517	Any process that stops, prevents, or reduces the frequency, rate or extent of the chemical reactions and pathways involving nitrogen or nitrogenous compounds.	39	0.0257	2.32e-11	7.34e-09	0.114035
GO_ORGAN_MORPHOGENESIS	841	Morphogenesis of an organ. An organ is defined as a tissue or set of tissues that work together to perform a specific function or functions. Morphogenesis is the process in which anatomical structures are generated and organized. Organs are commonly observed as visibly distinct structures, but may also exist as loosely associated clusters of cells that work together to perform a specific function…	34	0.0404	1.9e-15	1.41e-12	0.0994152
GO_NEGATIVE_REGULATION_OF_MULTICELLULAR_ORGANISMAL_PROCESS	983	Any process that stops, prevents, or reduces the frequency, rate or extent of an organismal process, the processes pertinent to the function of an organism above the cellular level; includes the integrated processes of tissues and organs.	34	0.0346	1.65e-13	8.14e-11	0.0994152
GO_CHROMOSOME_ORGANIZATION	1009	A process that is carried out at the cellular level that results in the assembly, arrangement of constituent parts, or disassembly of chromosomes, structures composed of a very long molecule of DNA and associated proteins that carries hereditary information. This term covers covalent modifications at the molecular level as well as spatial relationships among the major components of a chromosome.	30	0.0297	1.85e-10	4.1e-08	0.0877193
GO_REGULATION_OF_RESPONSE_TO_EXTERNAL_STIMULUS	926	Any process that modulates the frequency, rate or extent of a response to an external stimulus.	29	0.0313	1.14e-10	2.65e-08	0.0847953
GO_CHROMATIN_ORGANIZATION	663	Any process that results in the specification, formation or maintenance of the physical structure of eukaryotic chromatin.	26	0.0392	8.64e-12	2.99e-09	0.0760234
GO_EMBRYO_DEVELOPMENT_ENDING_IN_BIRTH_OR_EGG_HATCHING	554	The process whose specific outcome is the progression of an embryo over time, from zygote formation until the end of the embryonic life stage. The end of the embryonic life stage is organism-specific and may be somewhat arbitrary; for mammals it is usually considered to be birth, for insects the hatching of the first instar larva from the eggshell.	23	0.0415	4.64e-11	1.32e-08	0.0672515
GO_SKELETAL_SYSTEM_DEVELOPMENT	455	The process whose specific outcome is the progression of the skeleton over time, from its formation to the mature structure. The skeleton is the bony framework of the body in vertebrates (endoskeleton) or the hard outer envelope of insects (exoskeleton or dermoskeleton).	21	0.0462	4.77e-11	1.32e-08	0.0614035
GO_PATTERN_SPECIFICATION_PROCESS	418	Any developmental process that results in the creation of defined areas or spaces within an organism to which cells respond and eventually are instructed to differentiate.	20	0.0478	7.37e-11	1.82e-08	0.0584795

## Sheet: f. TF dICP0 ICP4 positive
Overlap Results
Collection(s):	TFT
# overlaps shown:	20
# genesets in collections:	615
# genes in comparison (n):	342
# genes in universe (N):	45956
Gene Set Name	# Genes in Gene Set (K)	Description	# Genes in Overlap (k)	k/K	p-value	FDR q-value
CAGGTG_E12_Q6	2485	Genes having at least one occurence of the highly conserved motif M12 CAGGTG sites. The motif matches transcription factor binding site V$E12_Q6 (v7.4 TRANSFAC).	68	0.0274	8.46e-21	5.2e-18
GGGCGGR_SP1_Q6	2940	Genes having at least one occurence of the highly conserved motif M6 GGGCGGR sites. The motif matches transcription factor binding site V$SP1_Q6 (v7.4 TRANSFAC).	63	0.0214	3.06e-14	3.77e-12
GGGAGGRR_MAZ_Q6	2274	Genes having at least one occurence of the highly conserved motif M24 GGGAGGRR sites. The motif matches transcription factor binding site V$MAZ_Q6 (v7.4 TRANSFAC).	61	0.0268	3.05e-18	9.39e-16
TTGTTT_FOXO4_01	2061	Genes having at least one occurence of the highly conserved motif M60 TTGTTT sites. The motif matches transcription factor binding site V$FOXO4_01 (v7.4 TRANSFAC).	54	0.0262	9.25e-16	1.42e-13
CTTTGT_LEF1_Q2	1972	Genes having at least one occurence of the highly conserved motif M13 CTTTGT sites. The motif matches transcription factor binding site V$LEF1_Q2 (v7.4 TRANSFAC).	44	0.0223	1.06e-10	5.45e-09
TATAAA_TATA_01	1296	Genes having at least one occurence of the highly conserved motif M51 TATAAA sites. The motif matches transcription factor binding site V$TATA_01 (v7.4 TRANSFAC).	39	0.0301	1.97e-13	2.02e-11
TGGAAA_NFAT_Q4_01	1896	Genes having at least one occurence of the highly conserved motif M55 TGGAAA sites. The motif matches transcription factor binding site V$NFAT_Q4_01 (v7.4 TRANSFAC).	39	0.0206	1.24e-08	3.82e-07
CAGCTG_AP4_Q5	1524	Genes having at least one occurence of the highly conserved motif M15 CAGCTG sites. The motif matches transcription factor binding site V$AP4_Q5 (v7.4 TRANSFAC).	38	0.0249	1.02e-10	5.45e-09
GGGTGGRR_PAX4_03	1294	Genes having at least one occurence of the highly conserved motif M56 GGGTGGRR sites. The motif matches transcription factor binding site V$PAX4_03 (v7.4 TRANSFAC).	36	0.0278	1.64e-11	1.12e-09
TGANTCA_AP1_C	1121	Genes having at least one occurence of the highly conserved motif M7 TGANTCA sites. The motif matches transcription factor binding site V$AP1_C (v7.4 TRANSFAC).	33	0.0294	2.81e-11	1.73e-09
GATTGGY_NFY_Q6_01	1160	Genes having at least one occurence of the highly conserved motif M5 GATTGGY sites. The motif matches transcription factor binding site V$NFY_Q6_01 (v7.4 TRANSFAC).	31	0.0267	1.18e-09	4.85e-08
RTAAACA_FREAC2_01	919	Genes having at least one occurence of the highly conserved motif M36 RTAAACA sites. The motif matches transcription factor binding site V$FREAC2_01 (v7.4 TRANSFAC).	28	0.0305	4.46e-10	1.96e-08
YATGNWAAT_OCT_C	360	Genes having at least one occurence of the highly conserved motif M44 YATGNWAAT sites. The motif matches transcription factor binding site V$OCT_C (v7.4 TRANSFAC).	24	0.0667	6.42e-16	1.32e-13
TGTTTGY_HNF3_Q6	738	Genes having at least one occurence of the highly conserved motif M83 TGTTTGY sites. The motif matches transcription factor binding site V$HNF3_Q6 (v7.4 TRANSFAC).	24	0.0325	2.33e-09	8.41e-08
RNGTGGGC_UNKNOWN	766	Genes having at least one occurence of the highly conserved motif M140 RNGTGGGC in the region spanning up to 4 kb around their transcription start sites. The motif does not match any known transcription factor binding site (v7.4 TRANSFAC).	24	0.0313	4.78e-09	1.63e-07
OCT1_01	266	Genes having at least one occurence of the transcription factor binding site V$OCT1_01 (v7.4 TRANSFAC) in the regions spanning up to 4 kb around their transcription starting sites.	18	0.0677	2.28e-12	1.89e-10
OCT1_B	267	Genes having at least one occurence of the transcription factor binding site V$OCT1_B (v7.4 TRANSFAC) in the regions spanning up to 4 kb around their transcription starting sites.	16	0.0599	2.33e-10	1.1e-08
OCT_C	268	Genes having at least one occurence of the transcription factor binding site V$OCT_C (v7.4 TRANSFAC) in the regions spanning up to 4 kb around their transcription starting sites.	15	0.056	2.18e-09	8.38e-08
MYOD_Q6_01	257	Genes having at least one occurence of the transcription factor binding site V$MYOD_Q6_01 (v7.4 TRANSFAC) in the regions spanning up to 4 kb around their transcription starting sites.	14	0.0545	1.06e-08	3.43e-07
KRCTCNNNNMANAGC_UNKNOWN	66	Genes having at least one occurence of the highly conserved motif M120 KRCTCNNNNMANAGC in the region spanning up to 4 kb around their transcription start sites. The motif does not match any known transcription factor binding site (v7.4 TRANSFAC).	11	0.1667	2.46e-12	1.89e-10
