# Supplementary figures and images for: HSV-1 single-cell analysis reveals the activation of anti-viral and developmental programs in distinct sub-populations
Source: eLife journal article supplement (doi:10.7554/elife.46339), 2019-05-15

**A**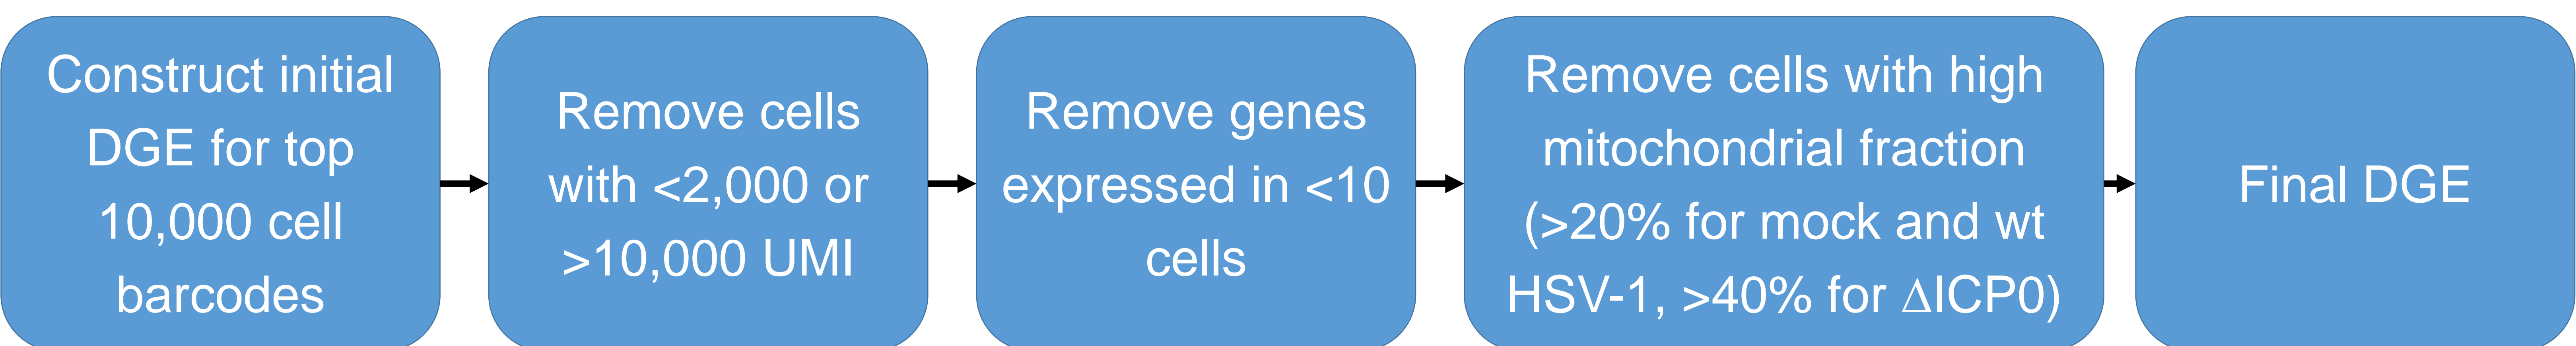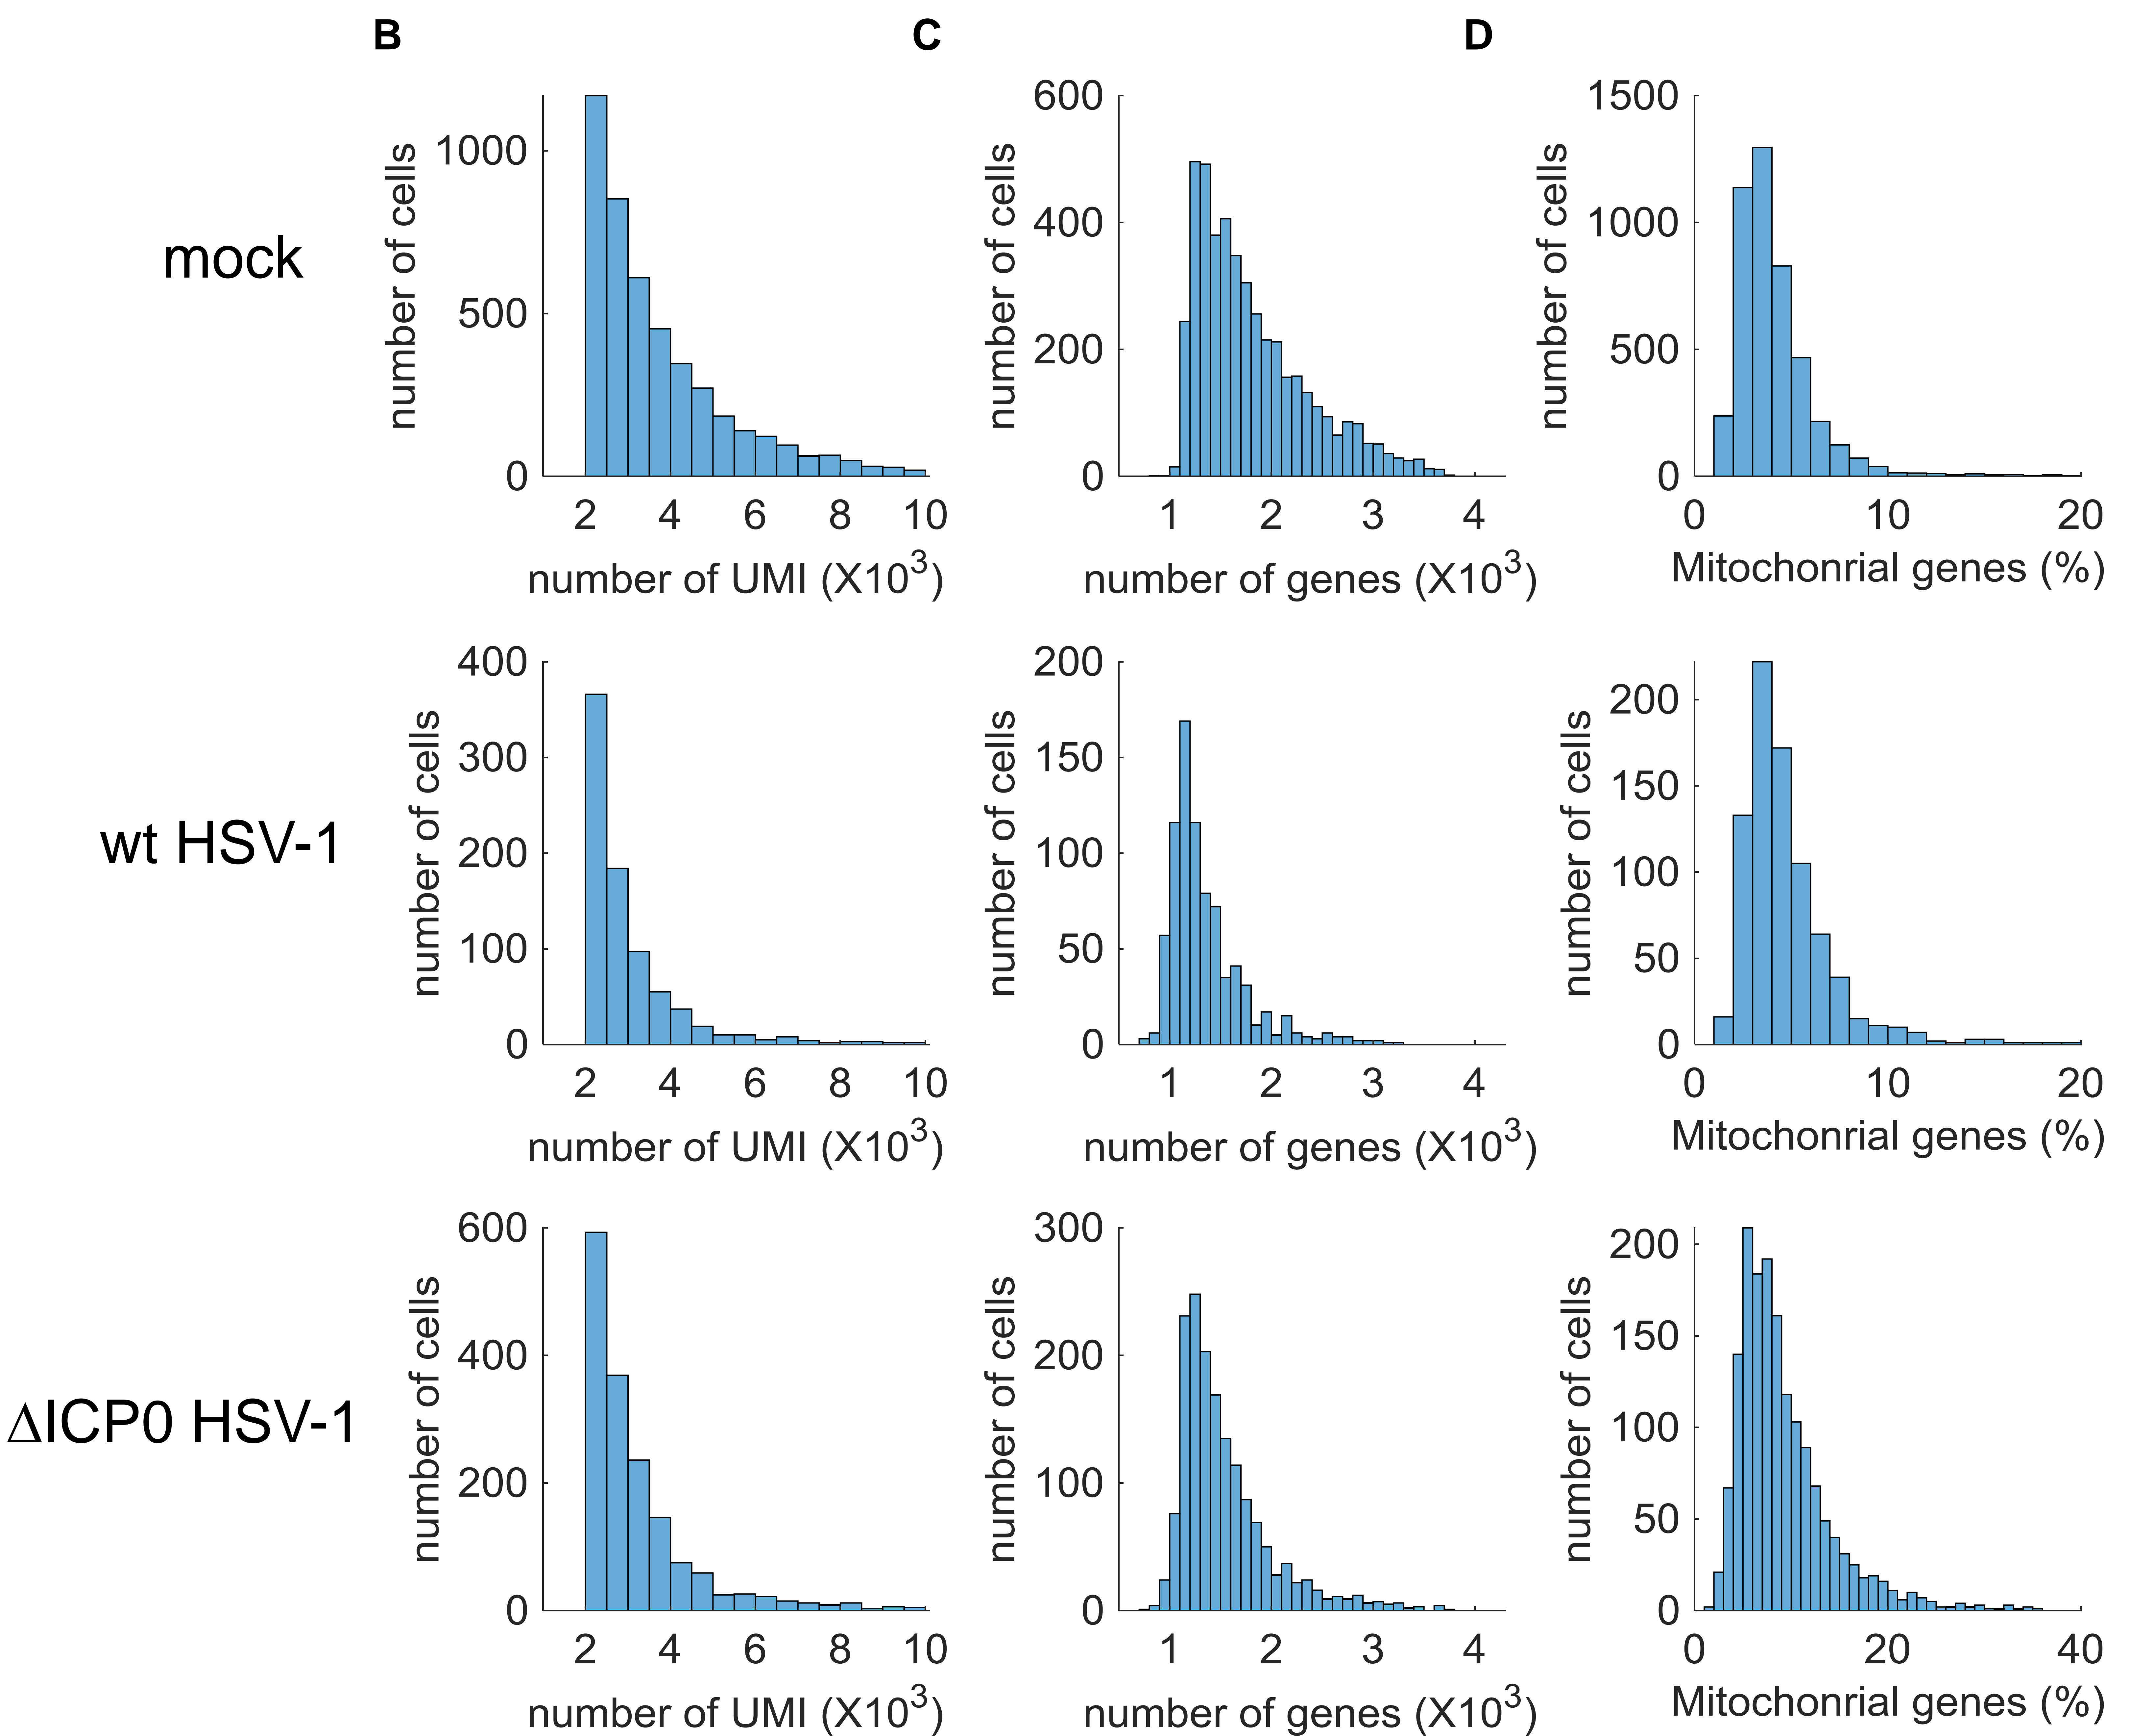

Supplement: supp [file elife_poa_e46339_Figure_1_figure_supplement_1.pdf › elife_poa_e46339_Figure_1_figure_supplement_1.pdf]

tSNE2

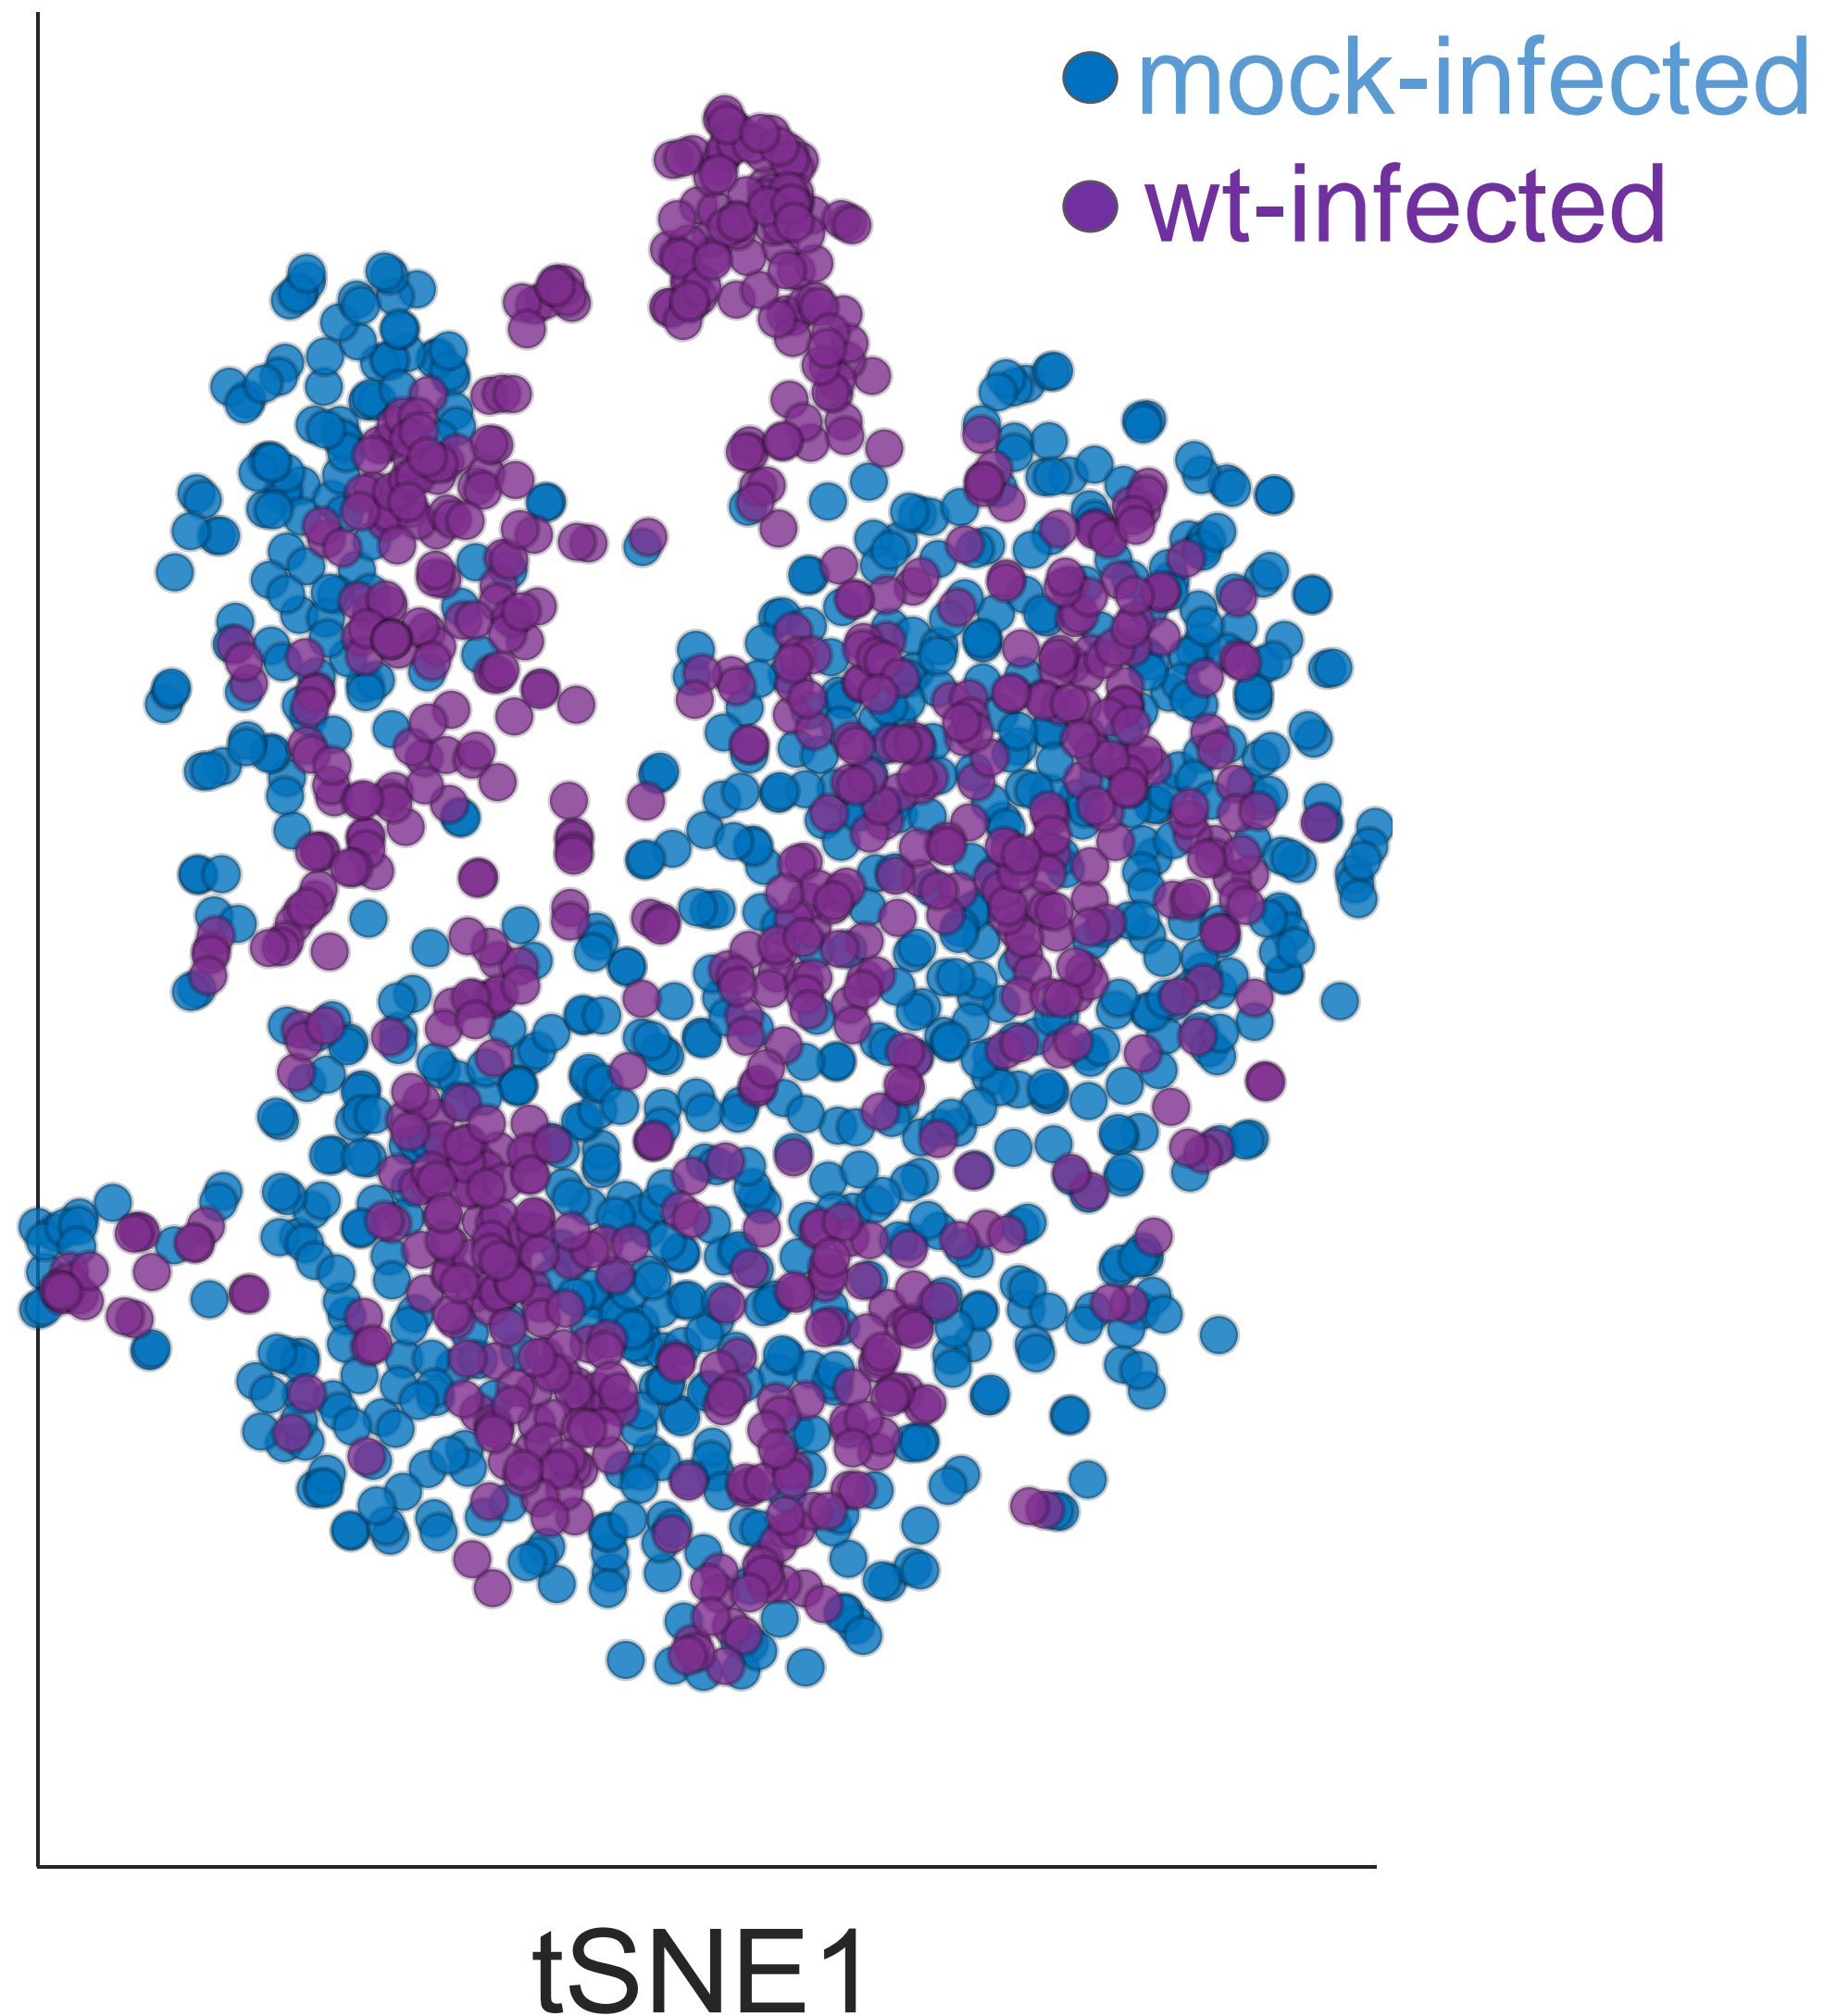

tSNE2

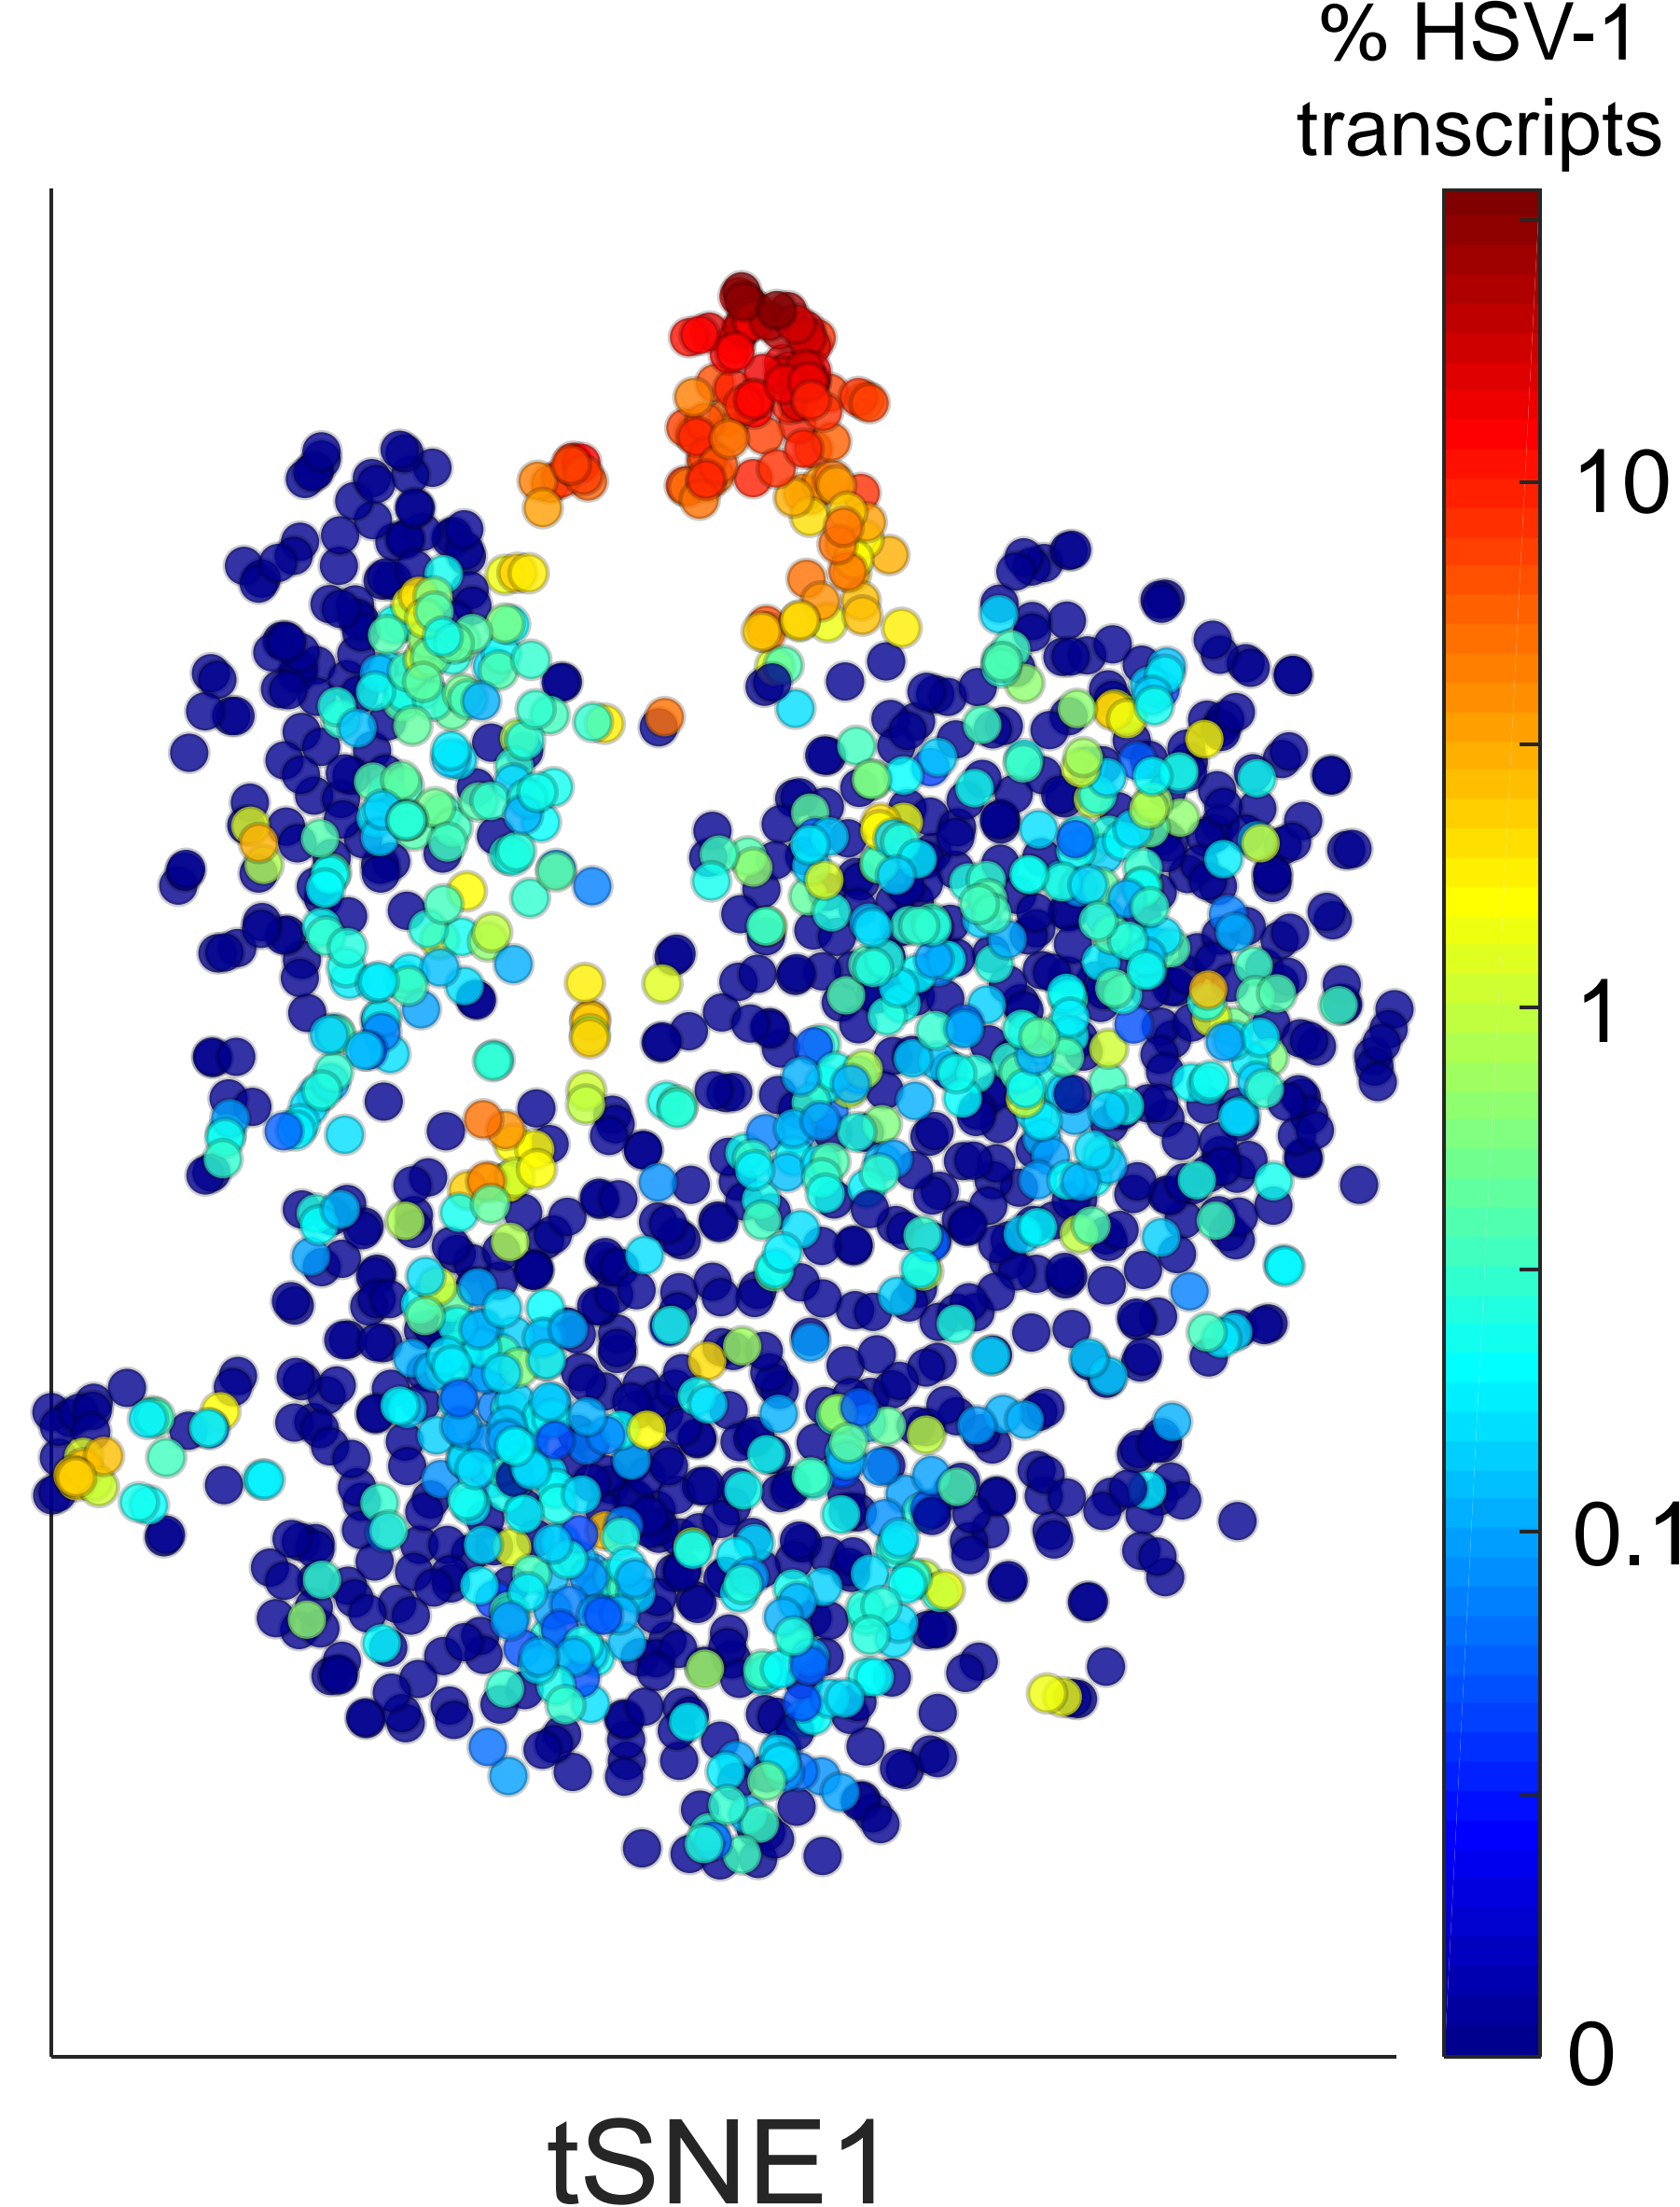

Supplement: supp [file elife_poa_e46339_Figure_1_figure_supplement_2.pdf › elife_poa_e46339_Figure_1_figure_supplement_2.pdf]

**A**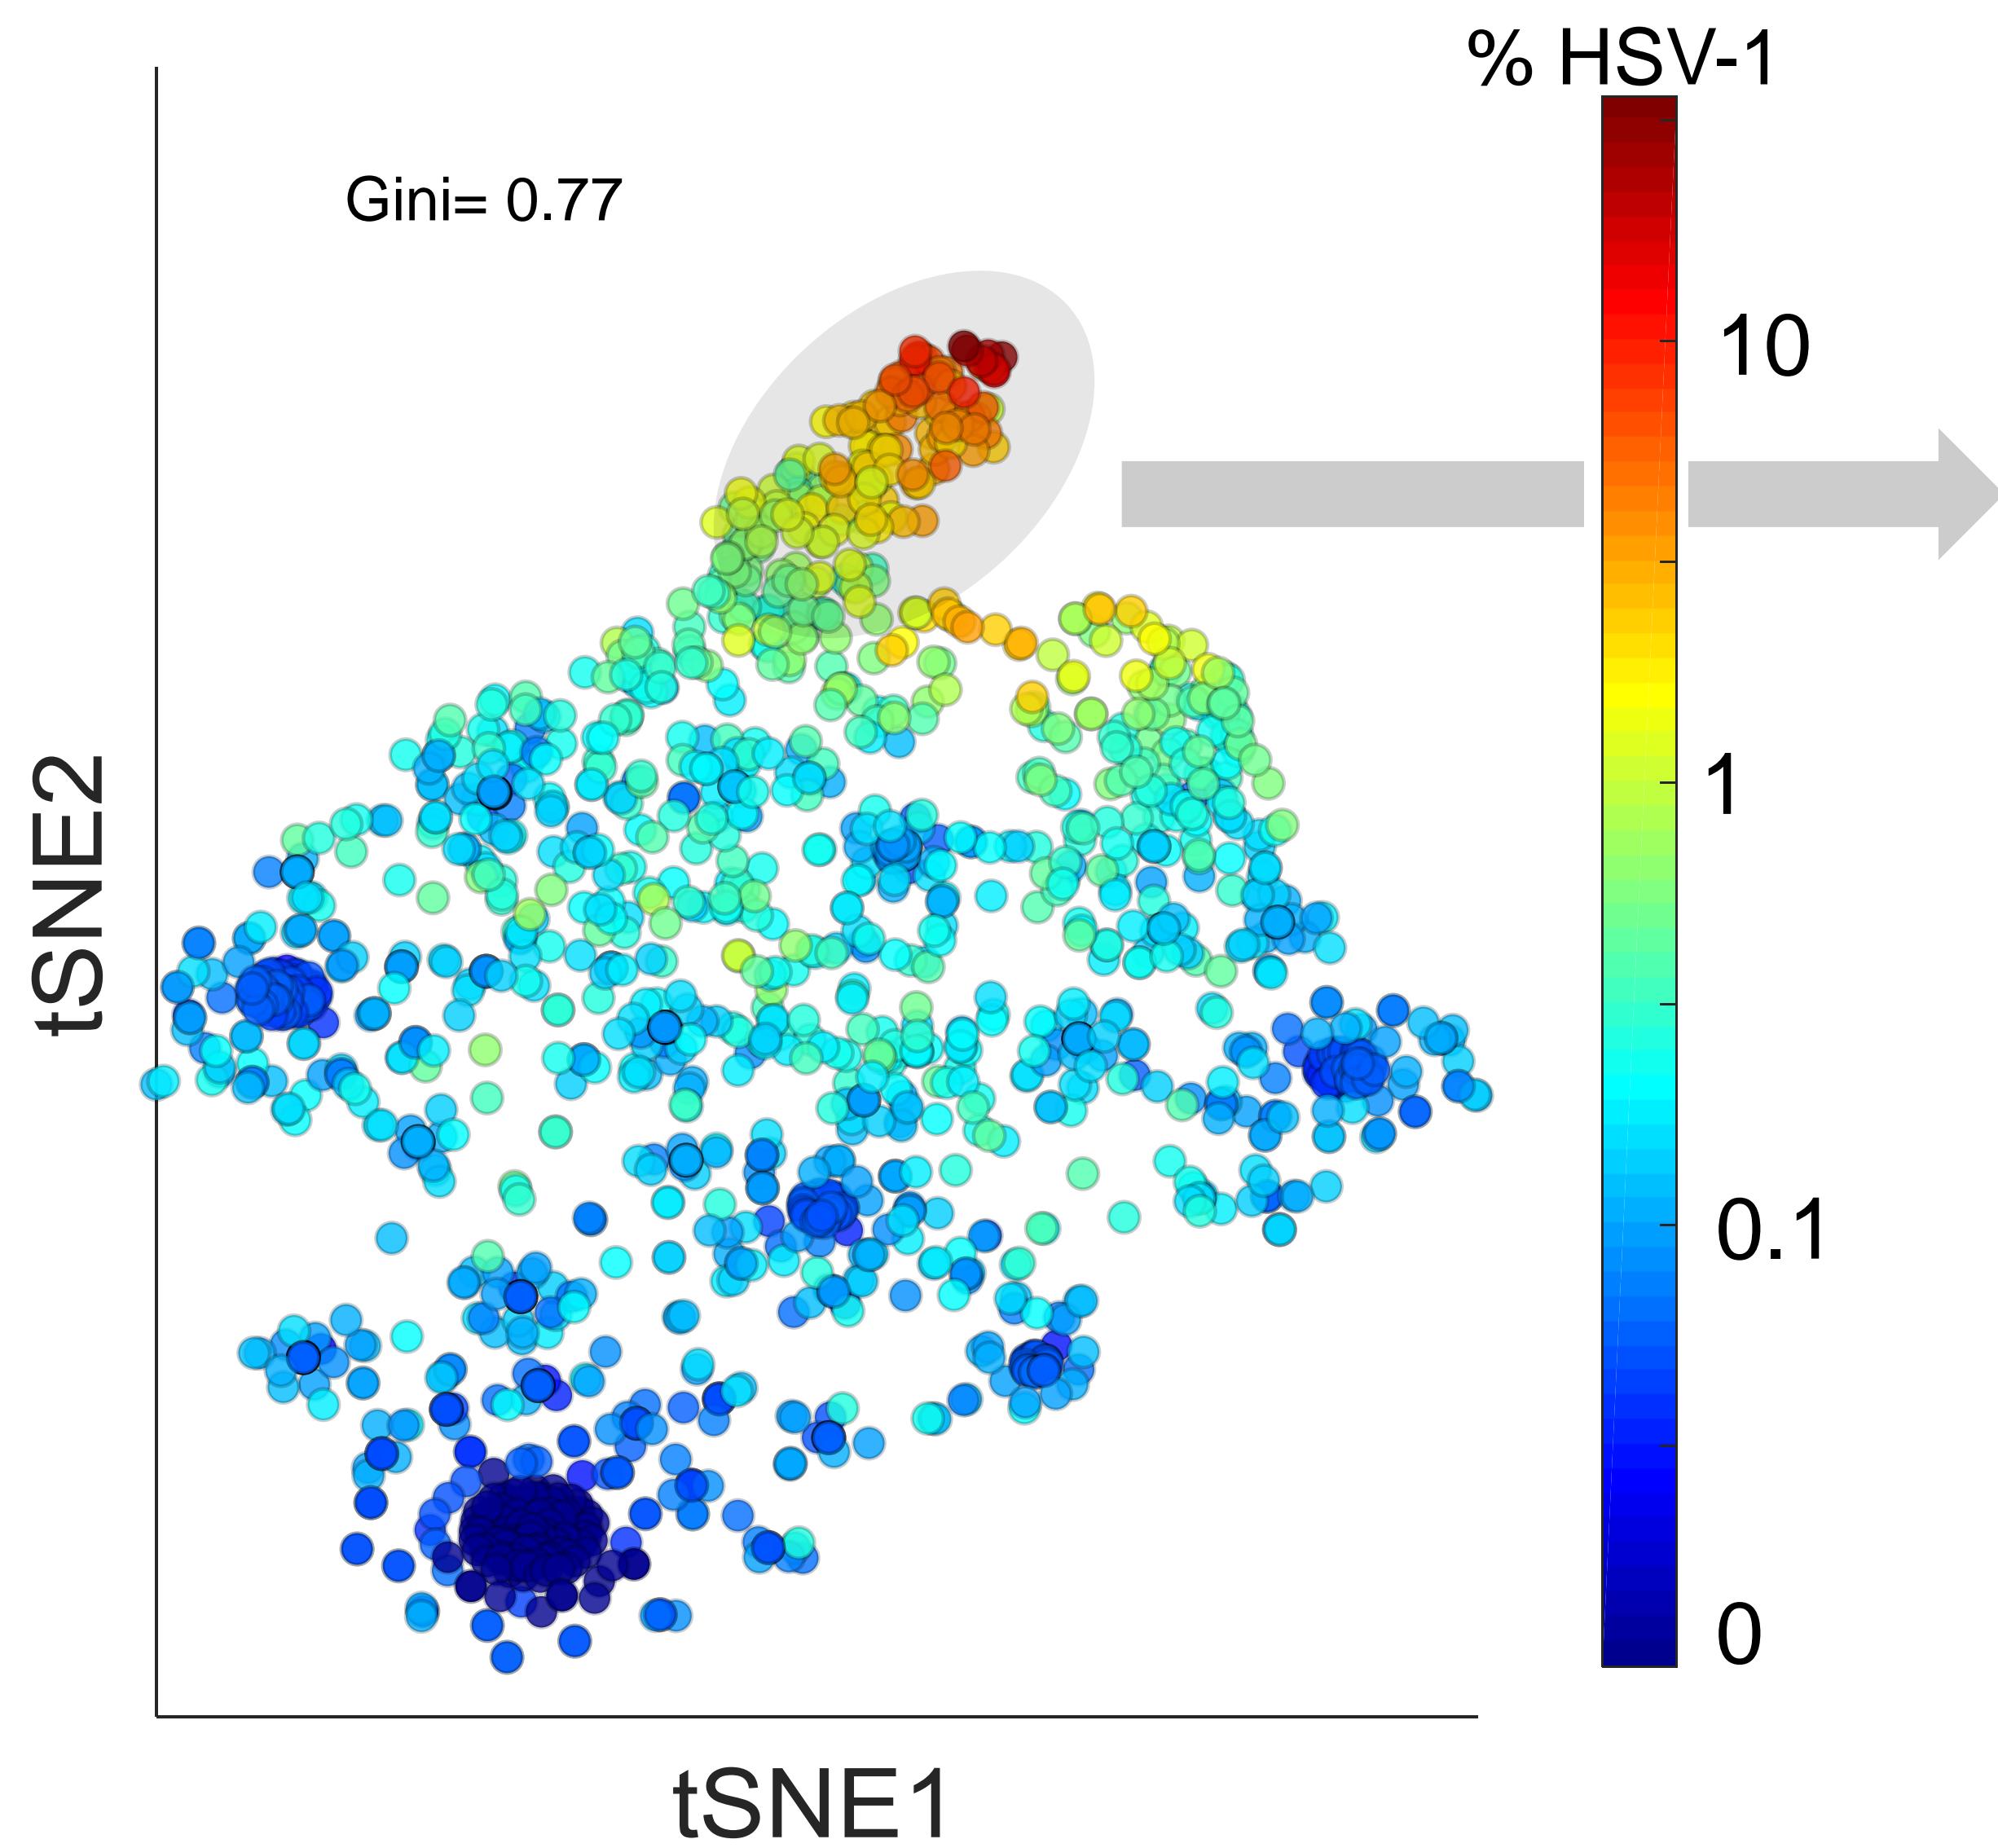**B**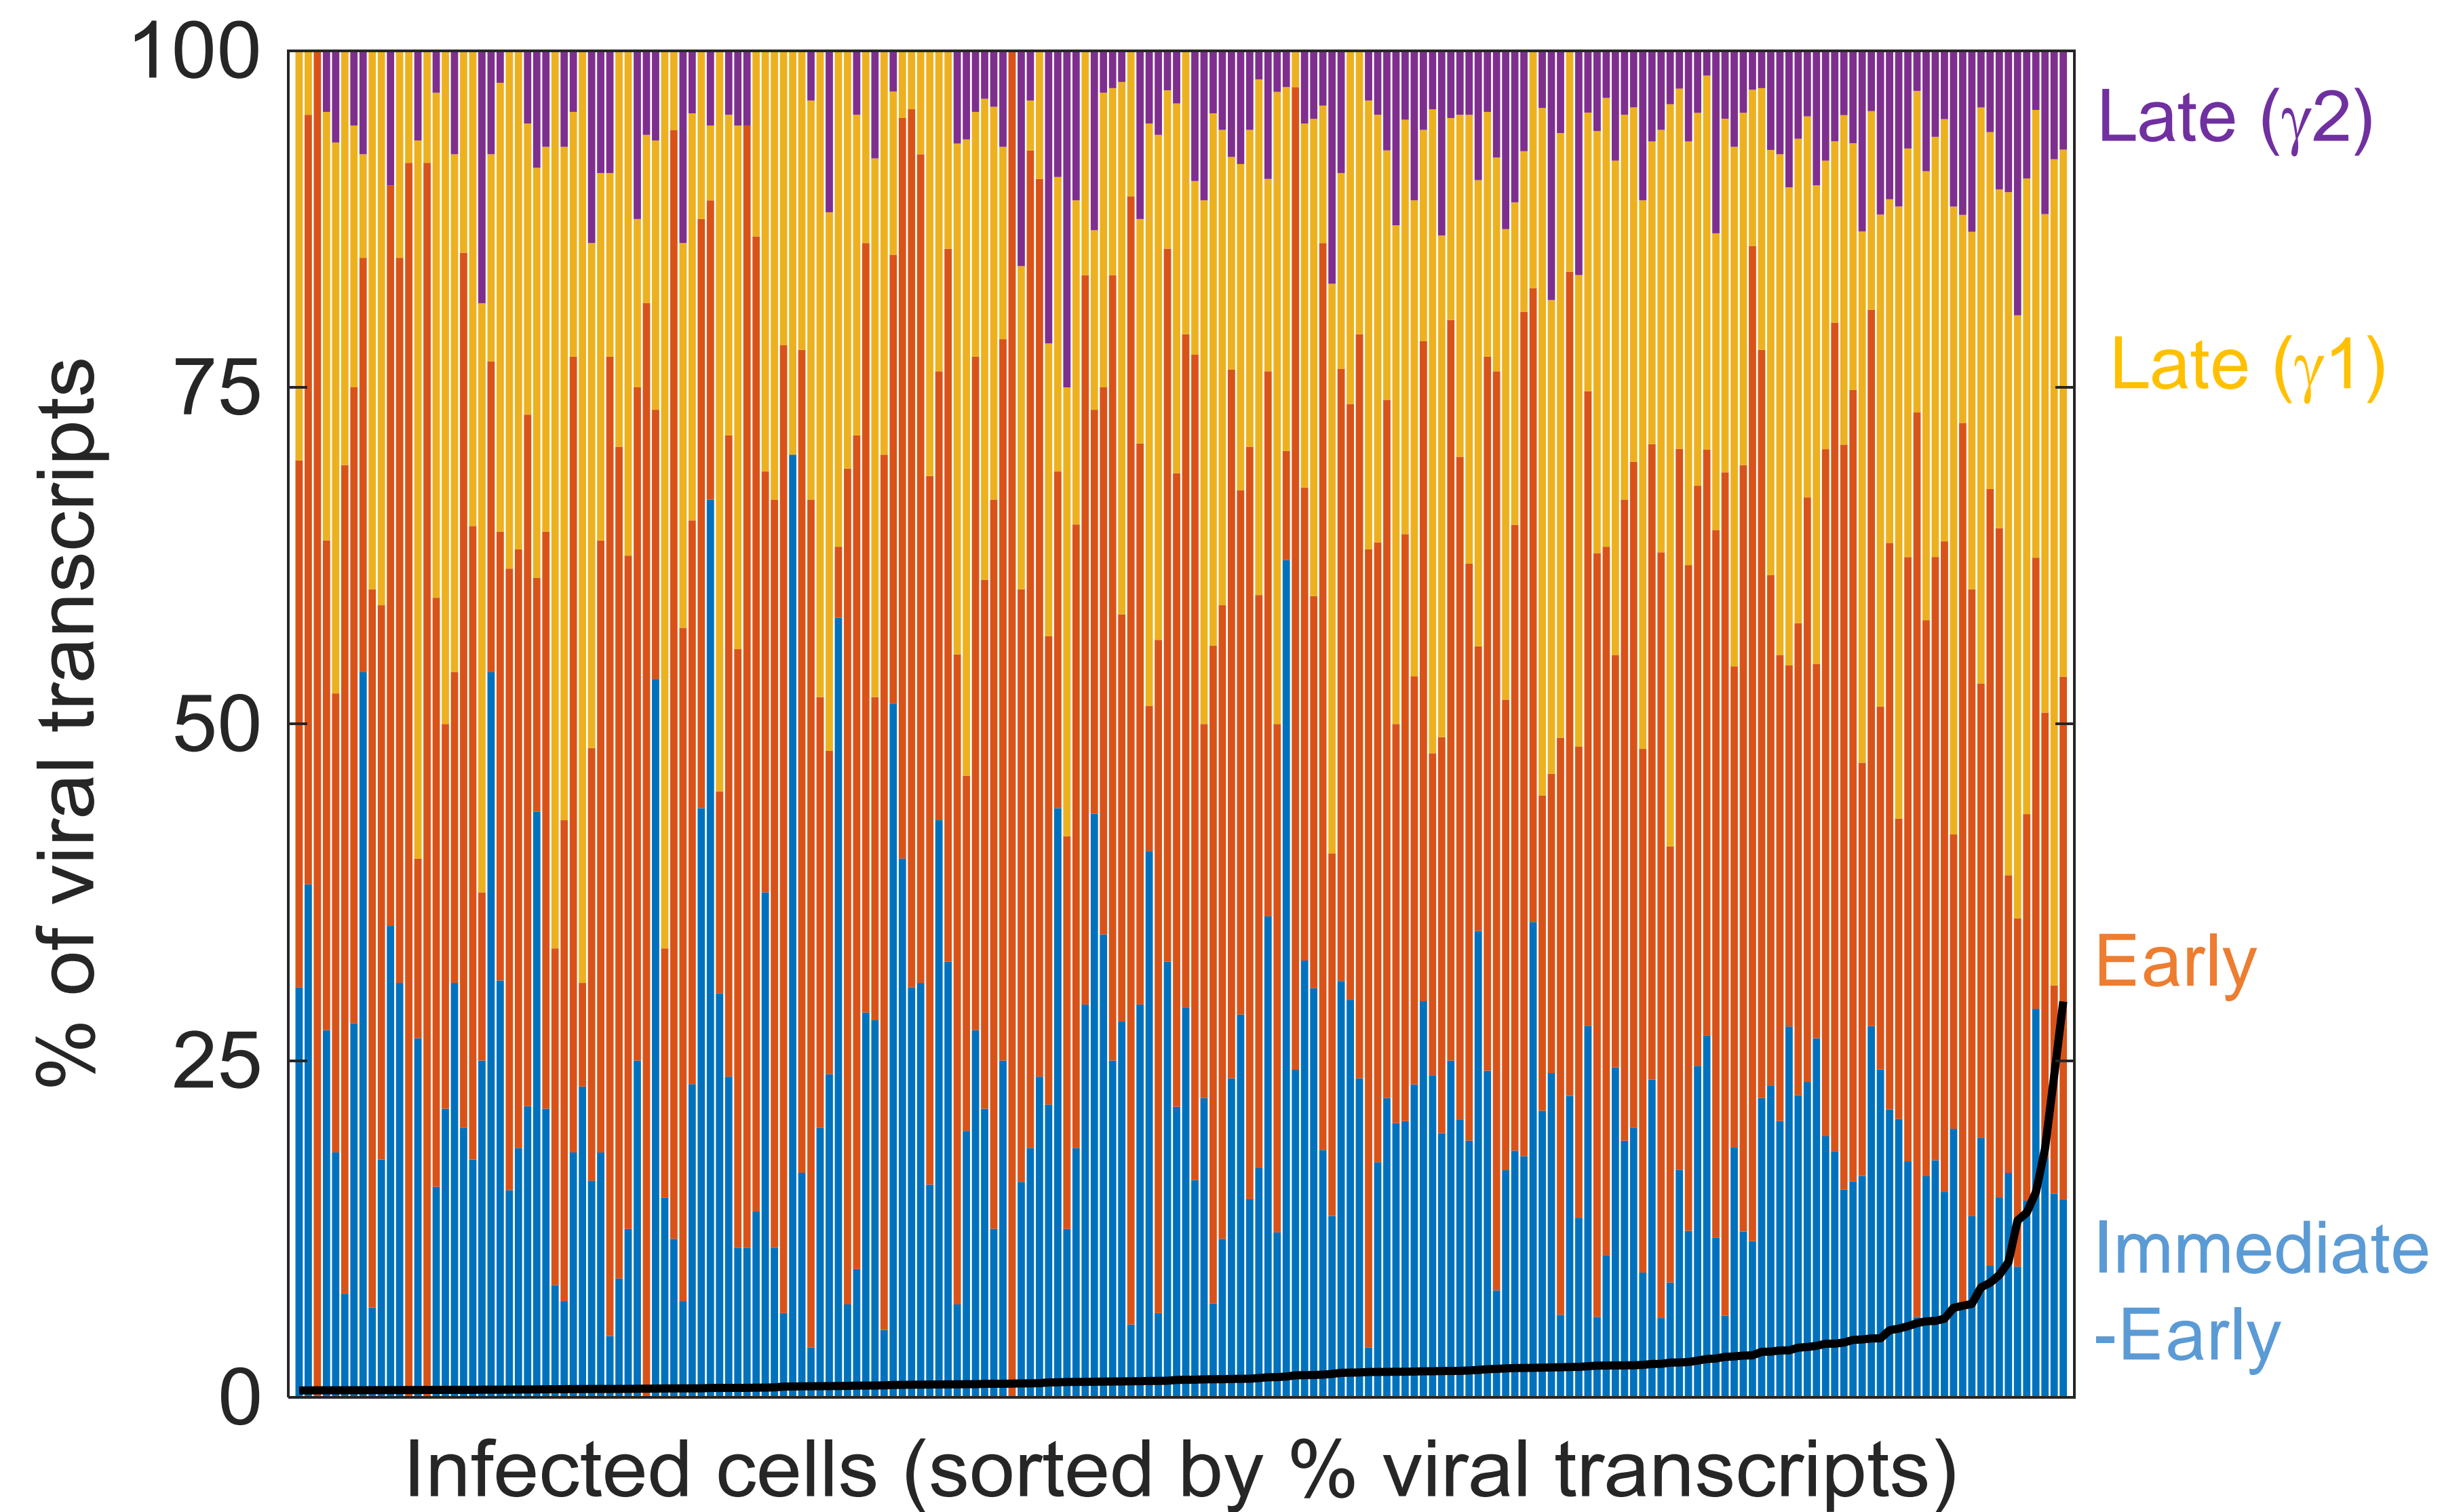**C**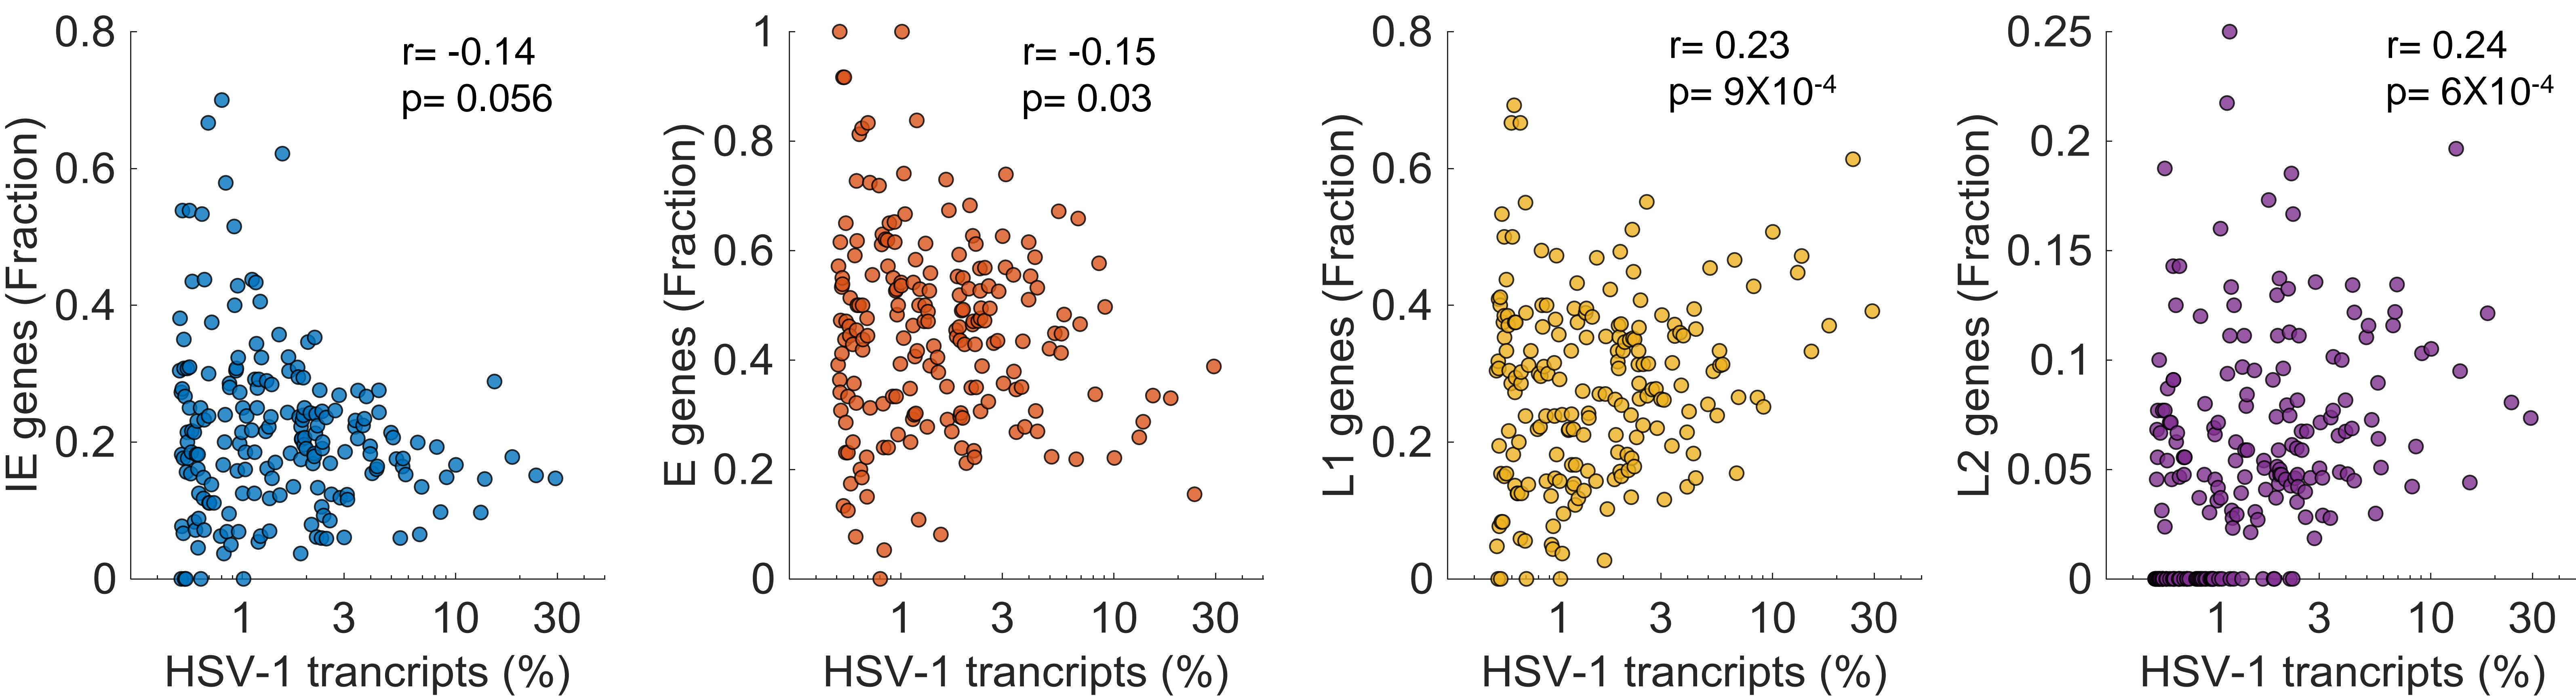

Supplement: supp [file elife_poa_e46339_Figure_1_figure_supplement_3.pdf › elife_poa_e46339_Figure_1_figure_supplement_3.pdf]

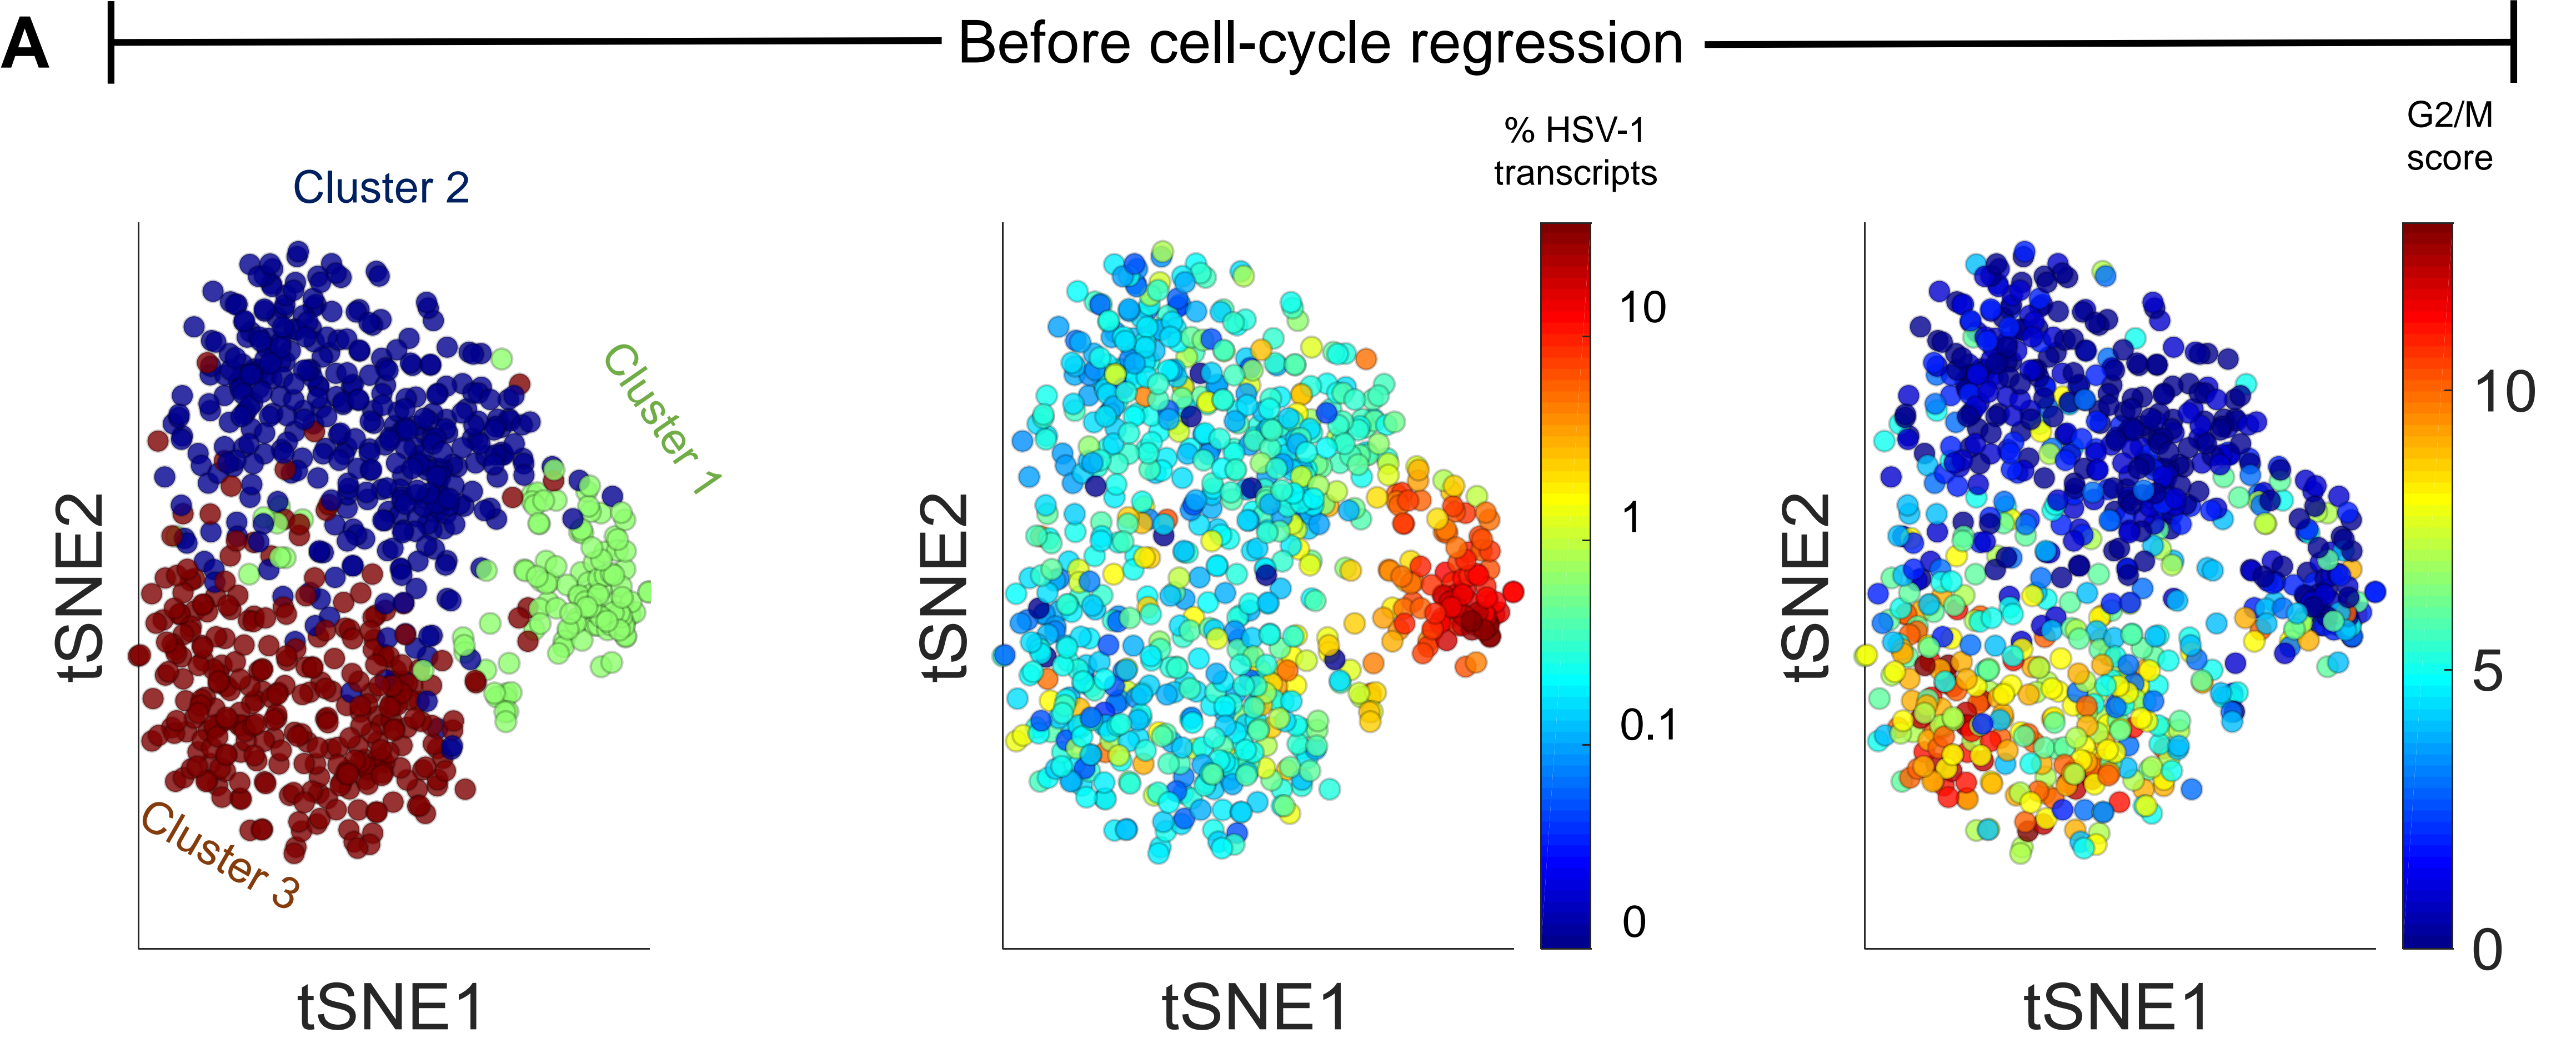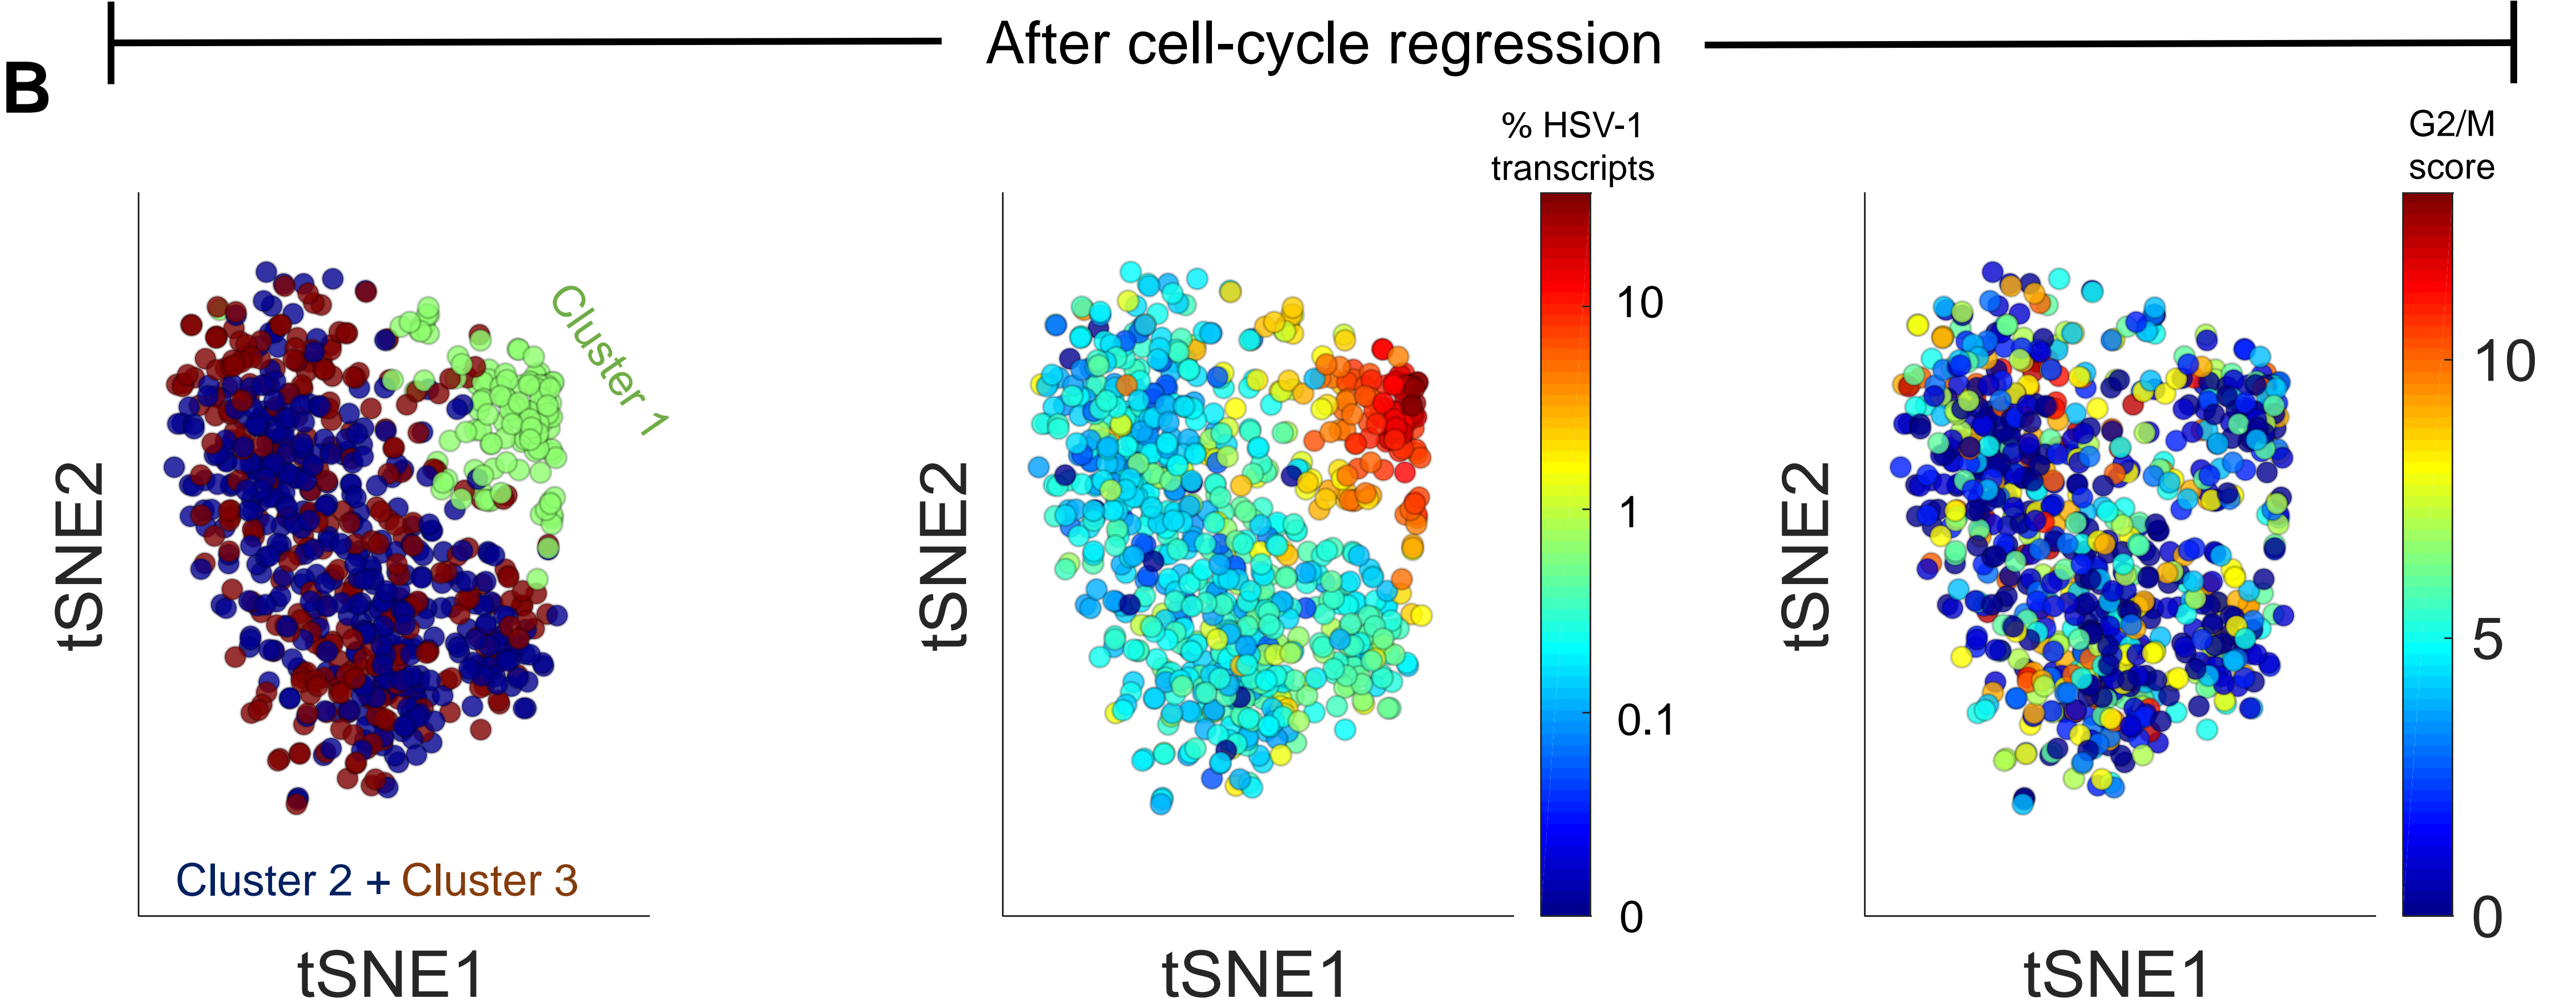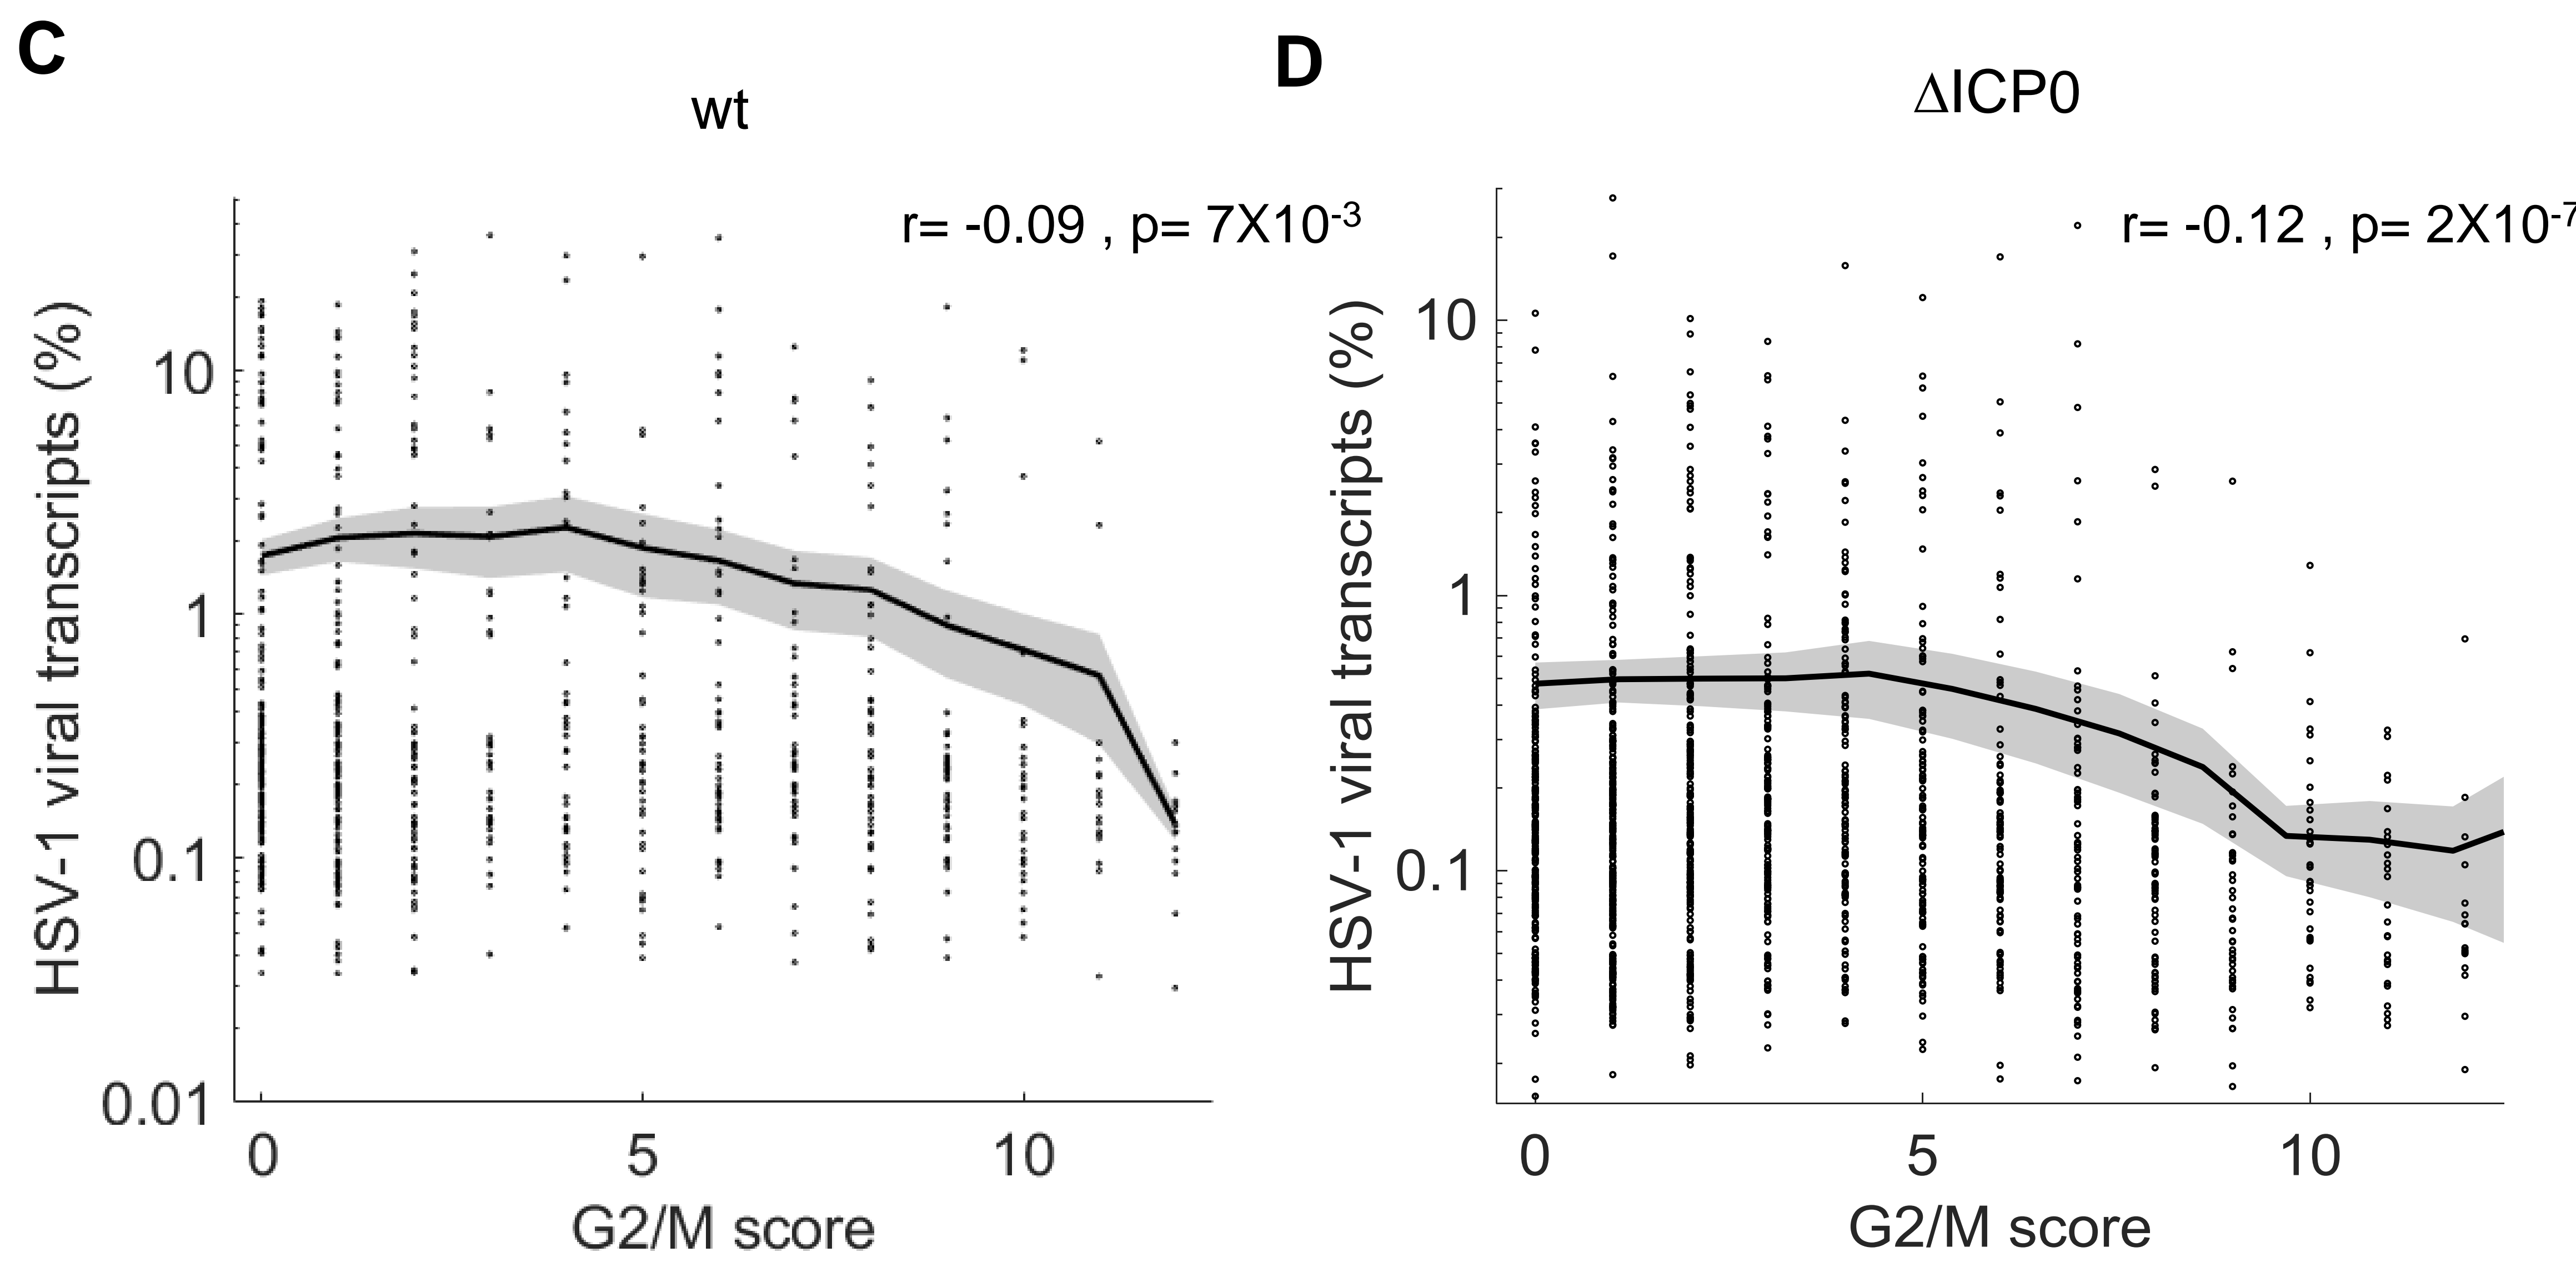

Supplement: supp [file elife_poa_e46339_Figure_2_figure_supplement_1.pdf › elife_poa_e46339_Figure_2_figure_supplement_1.pdf]

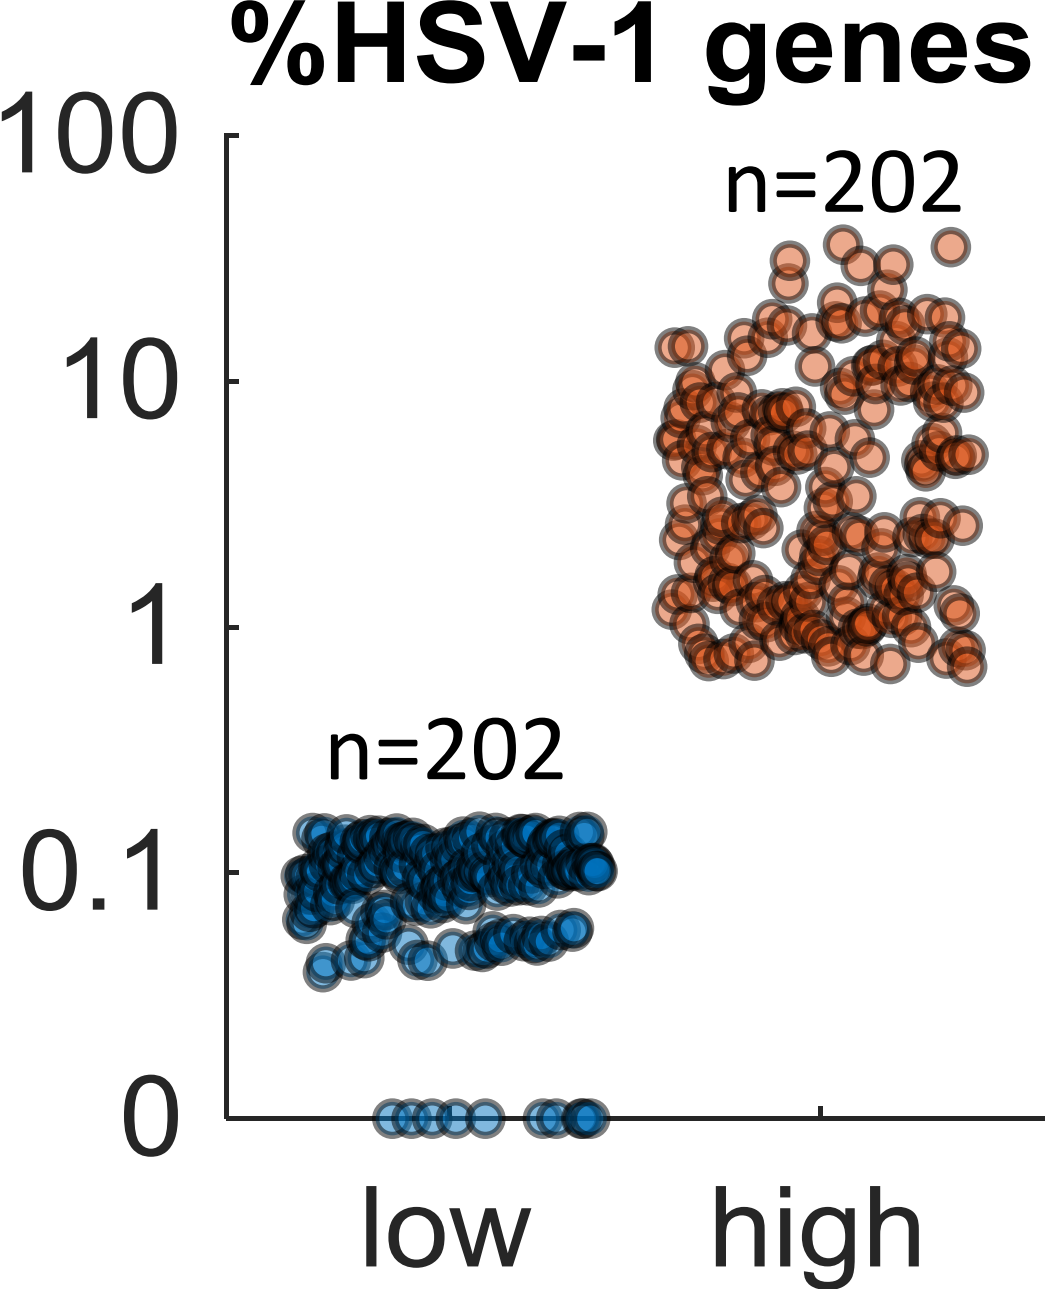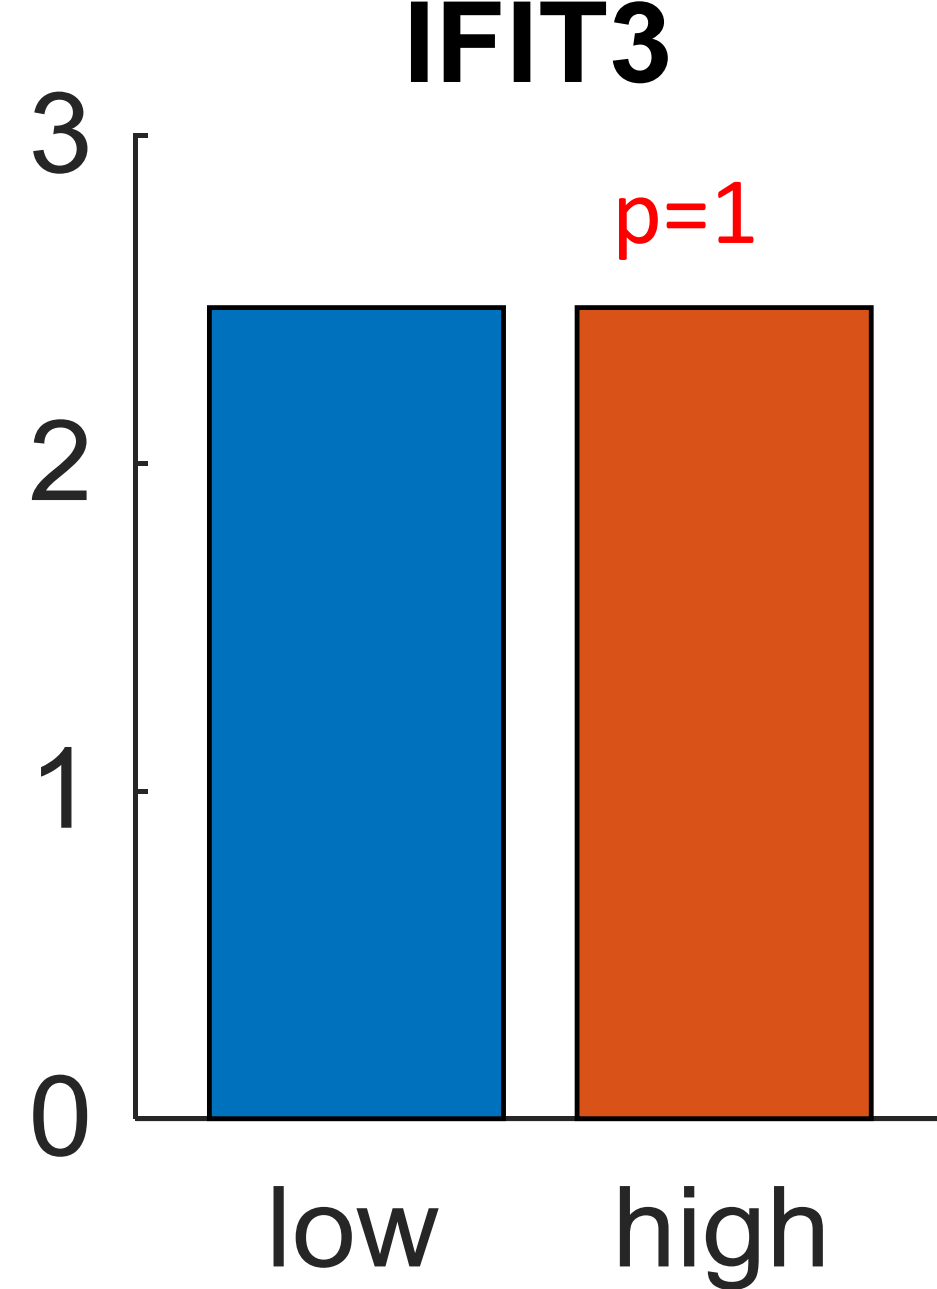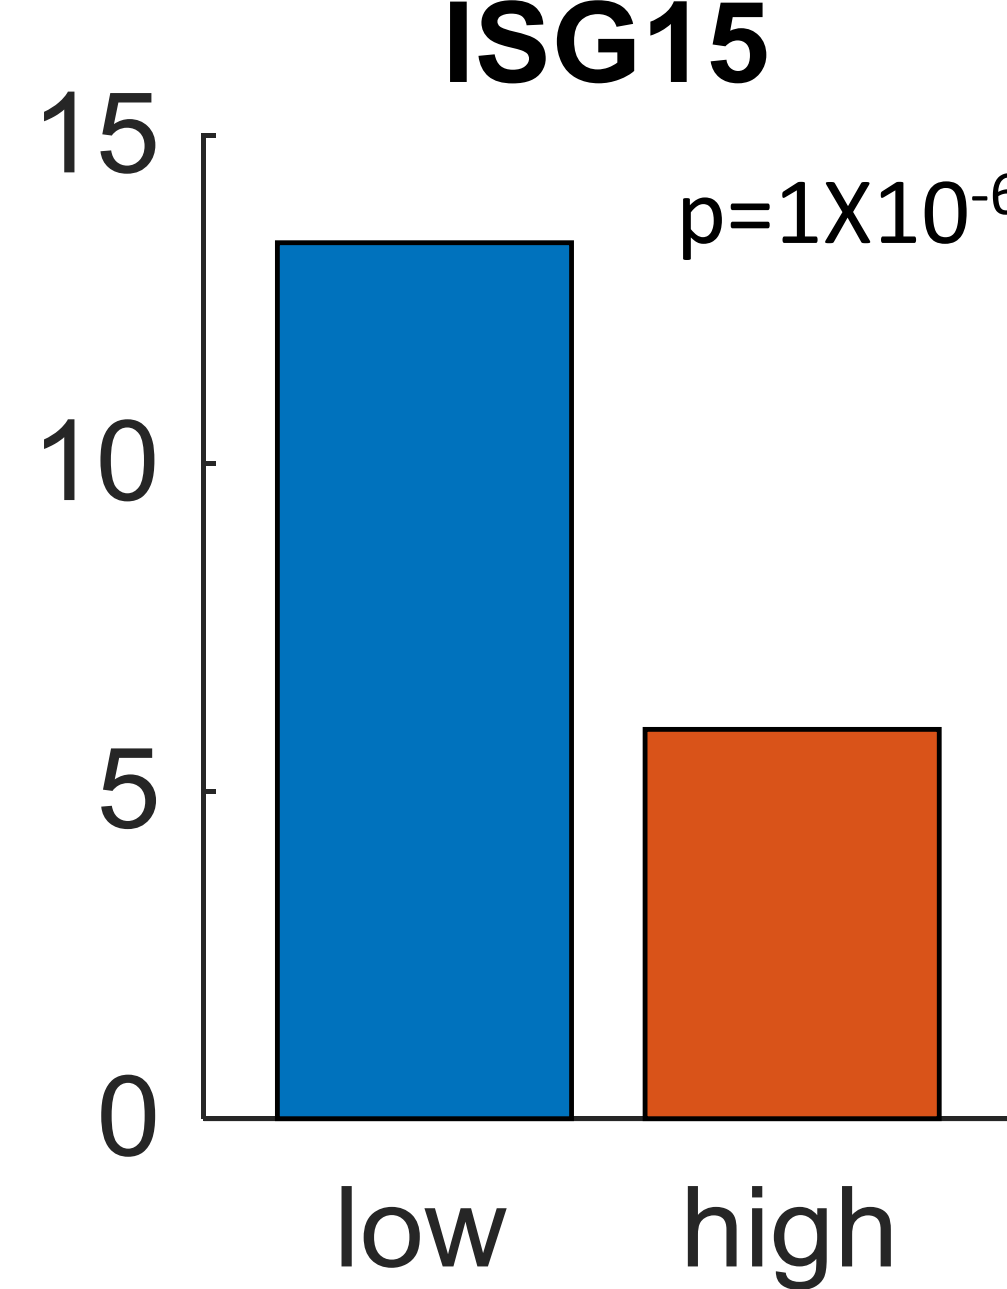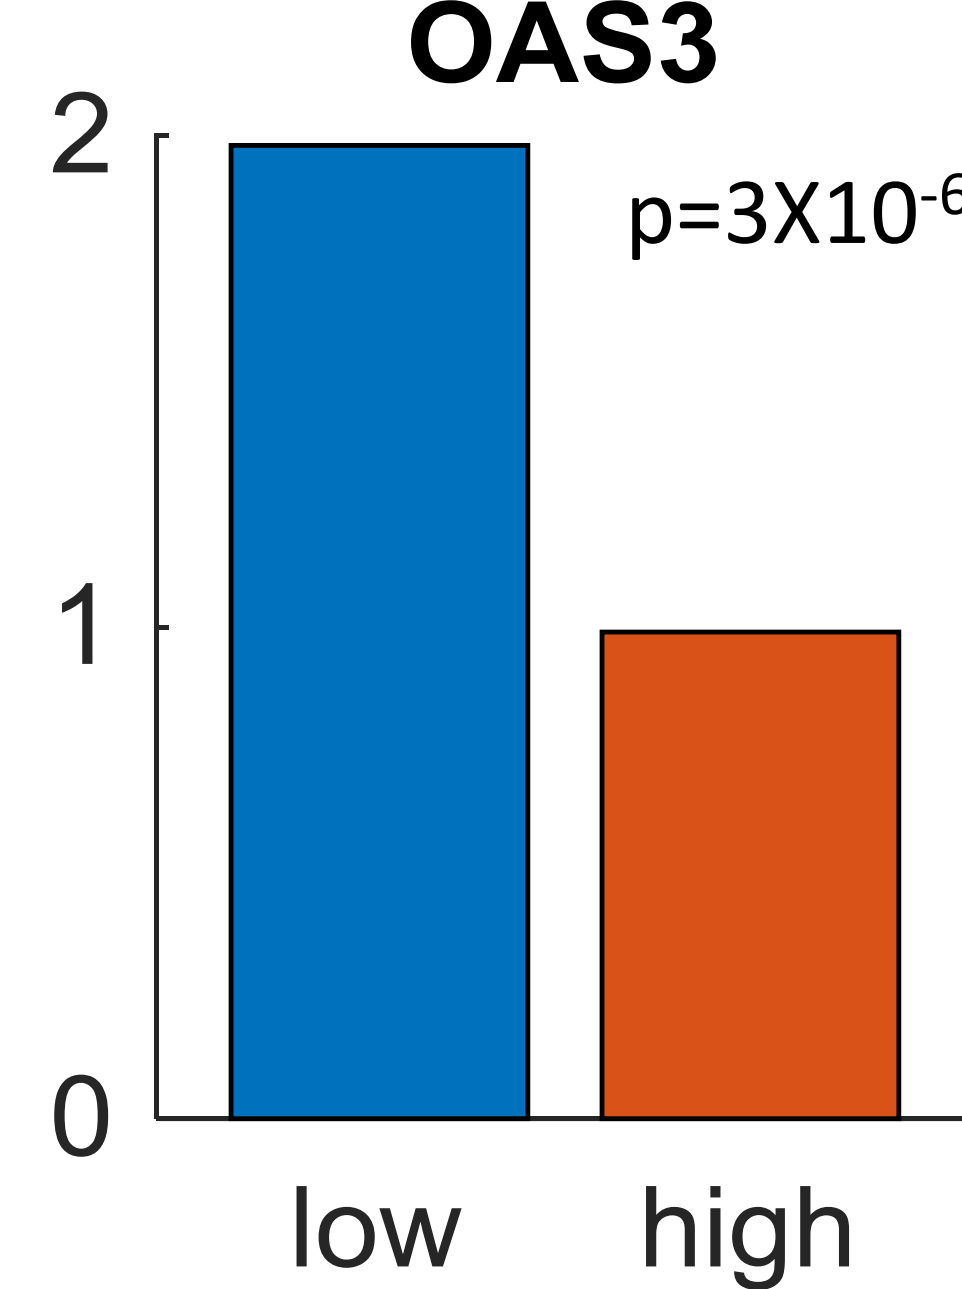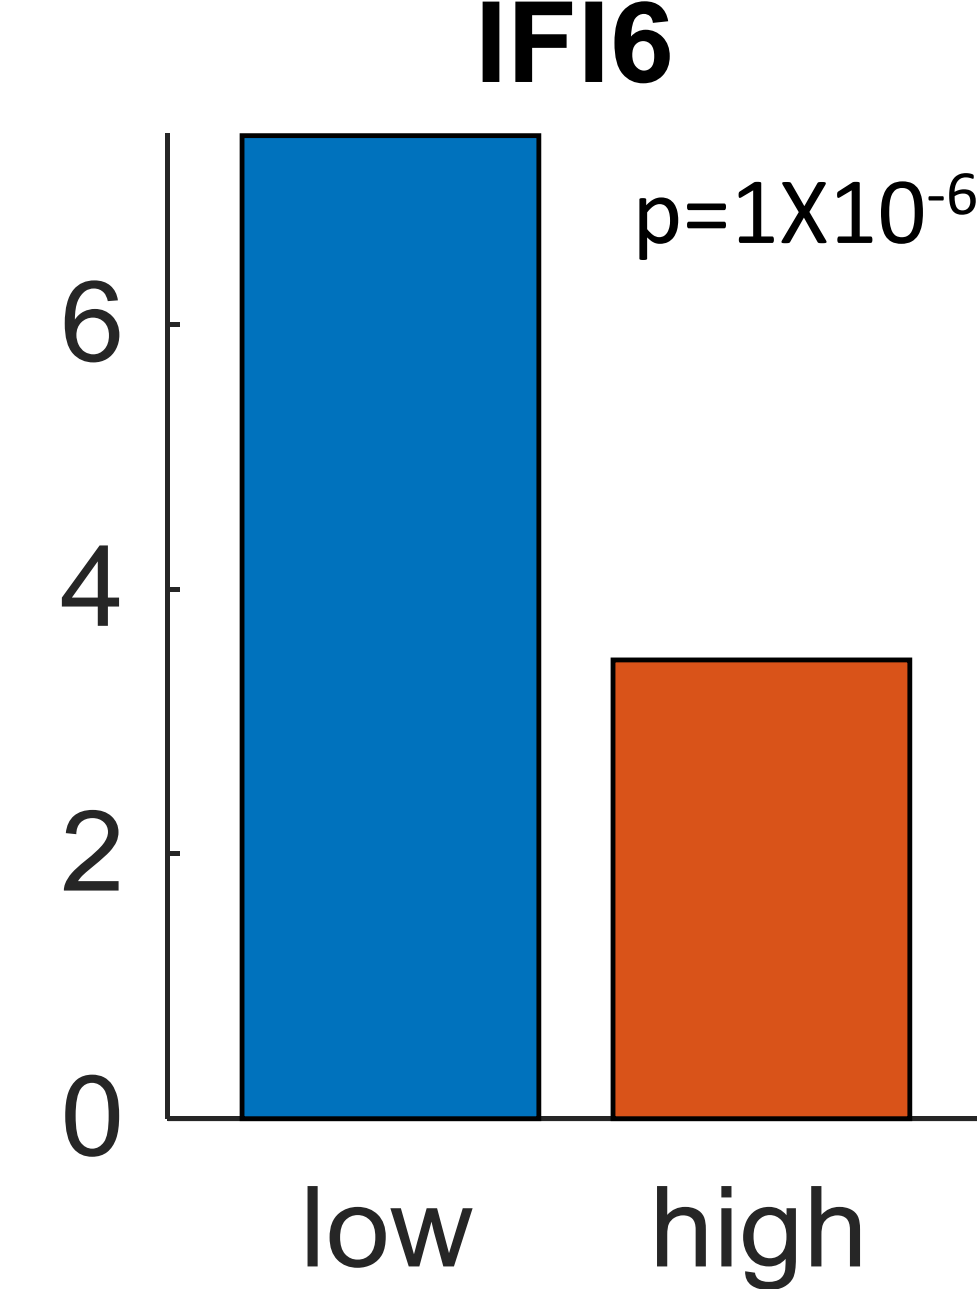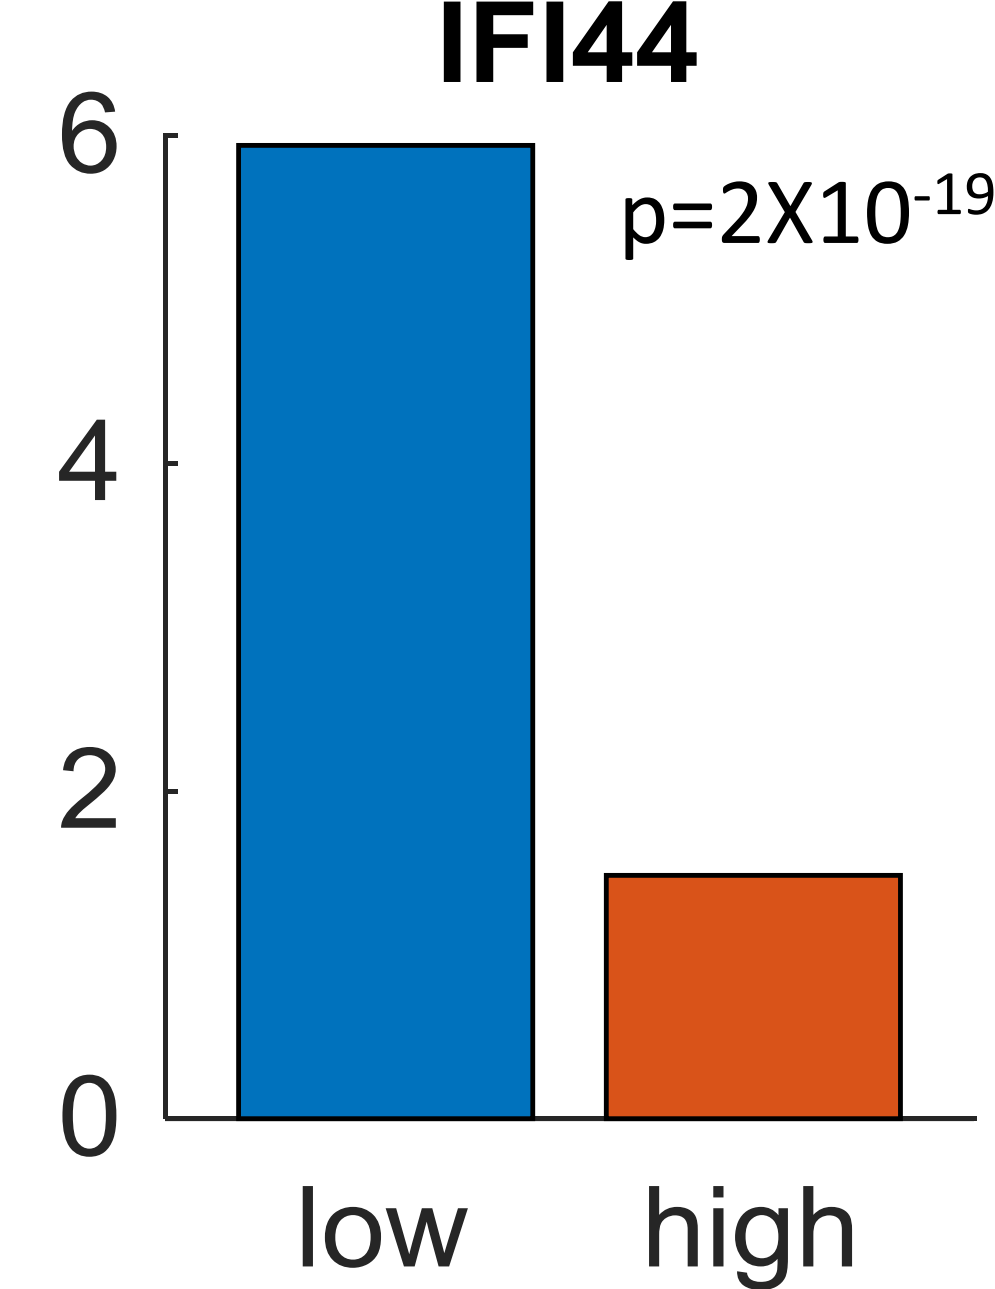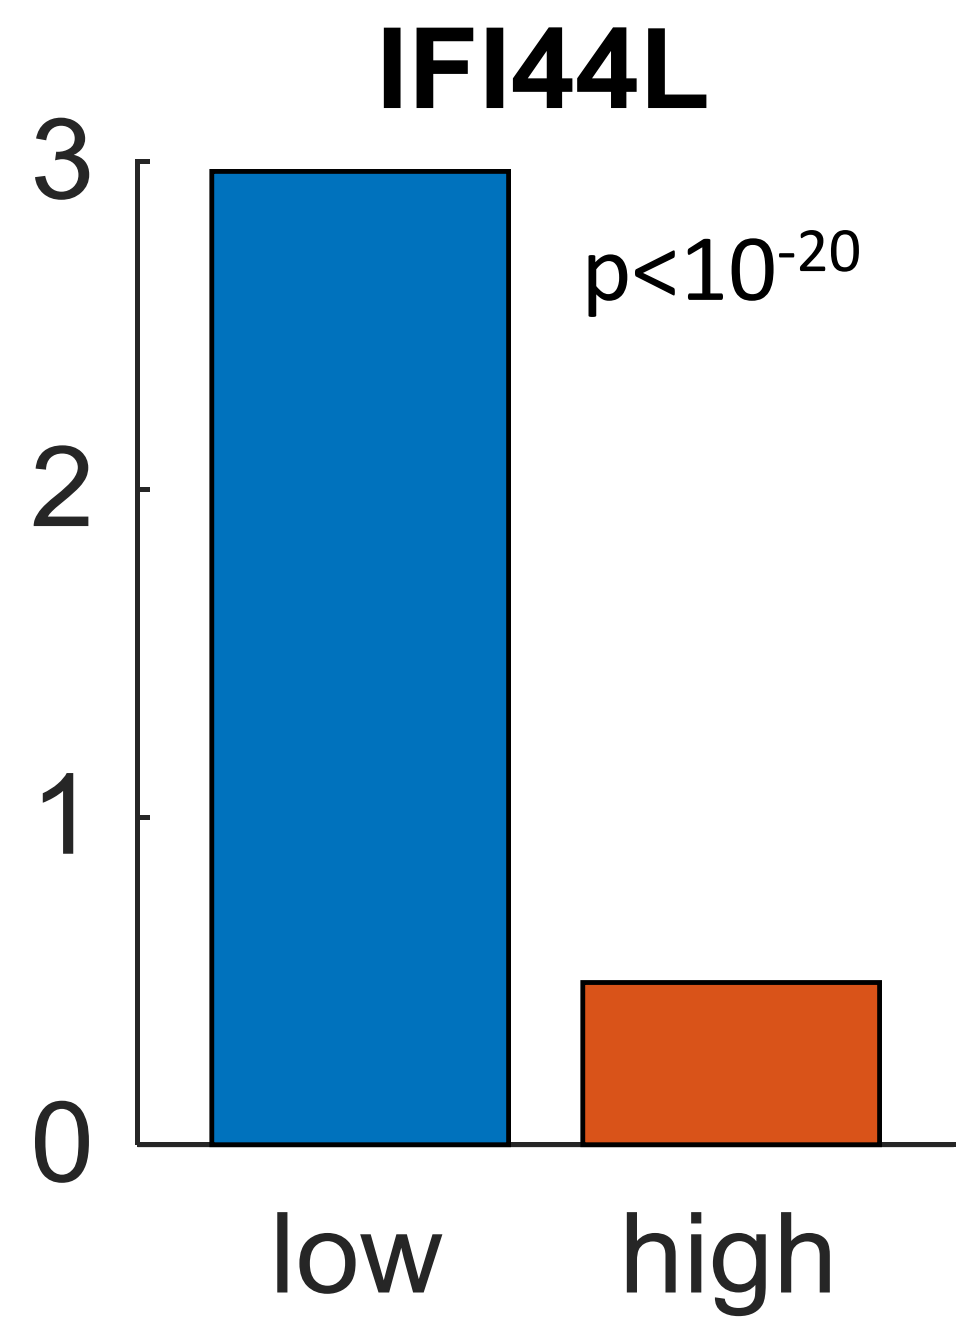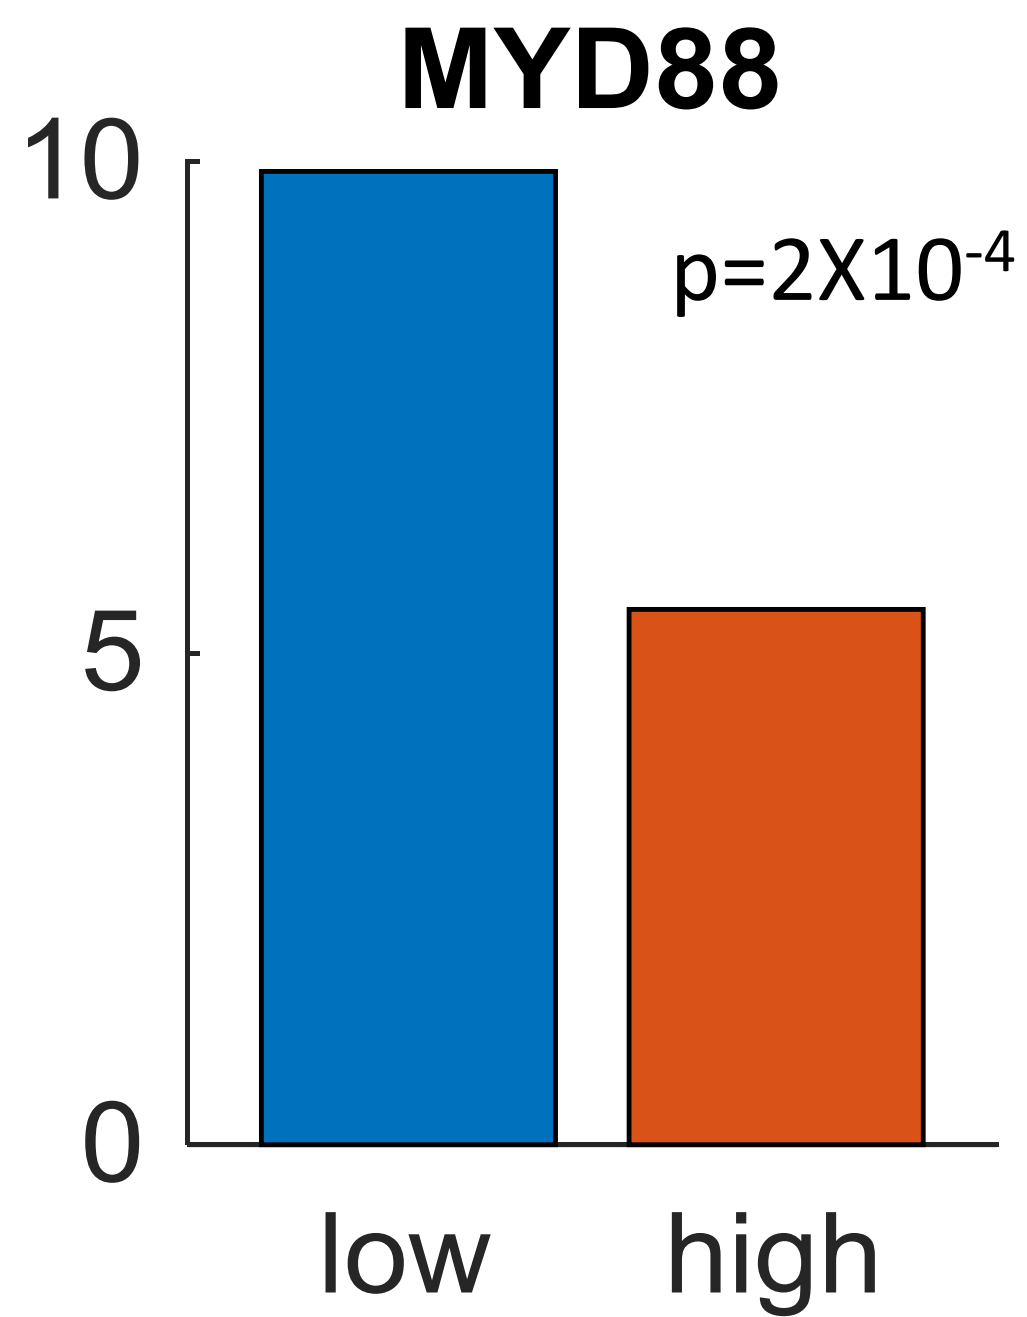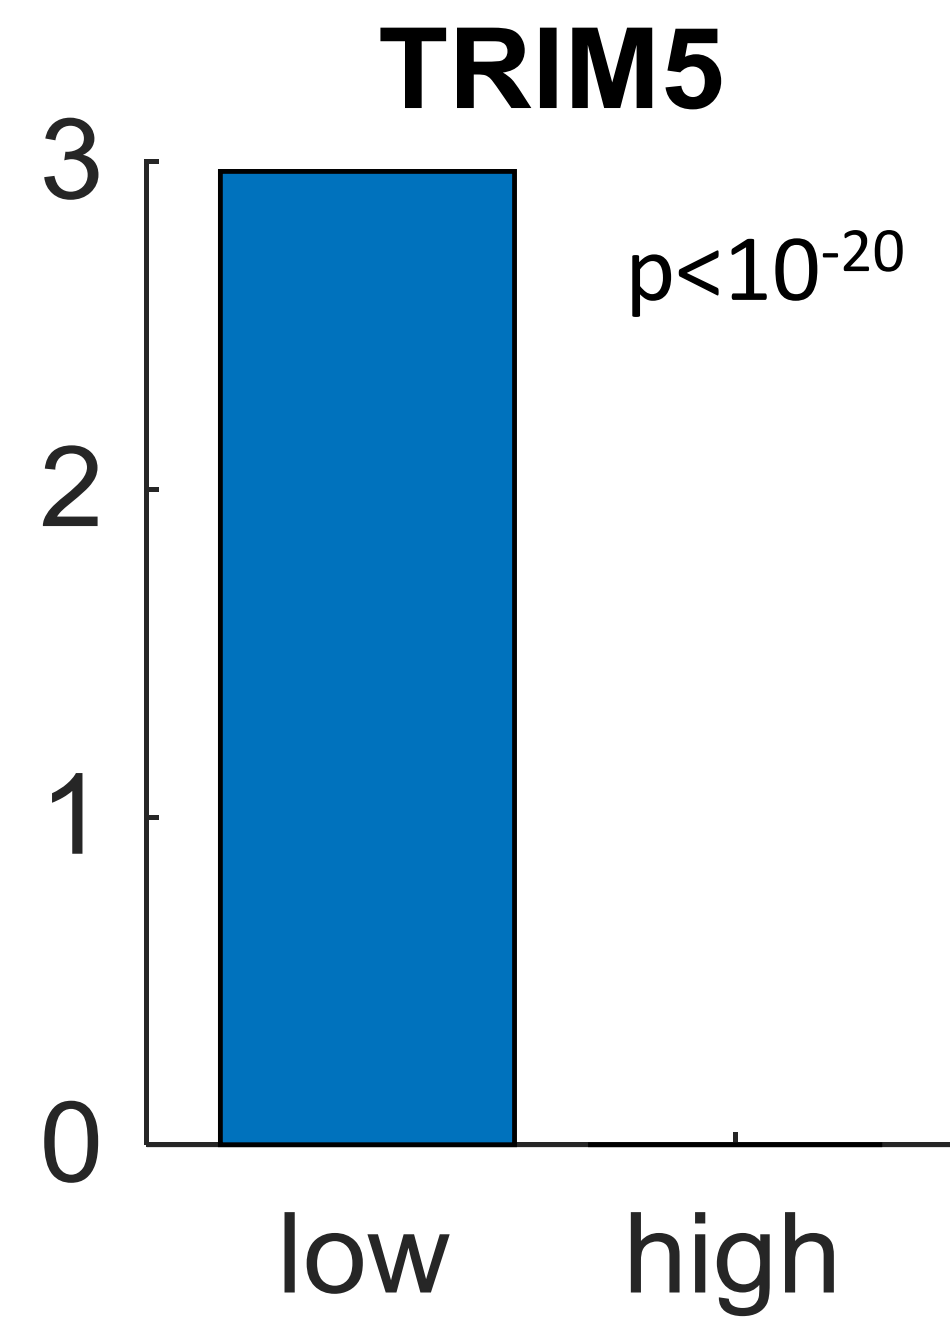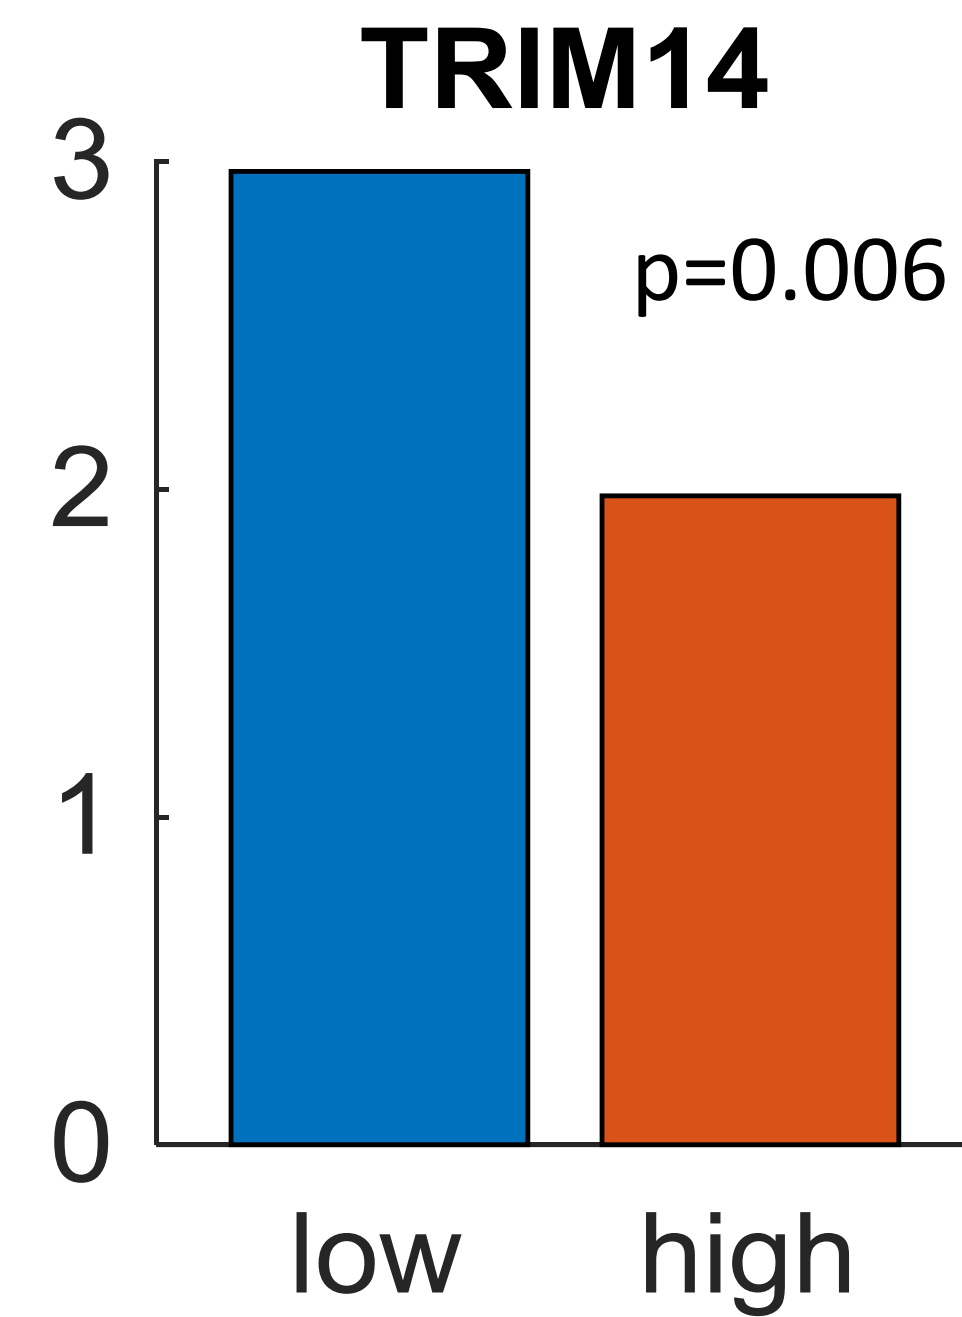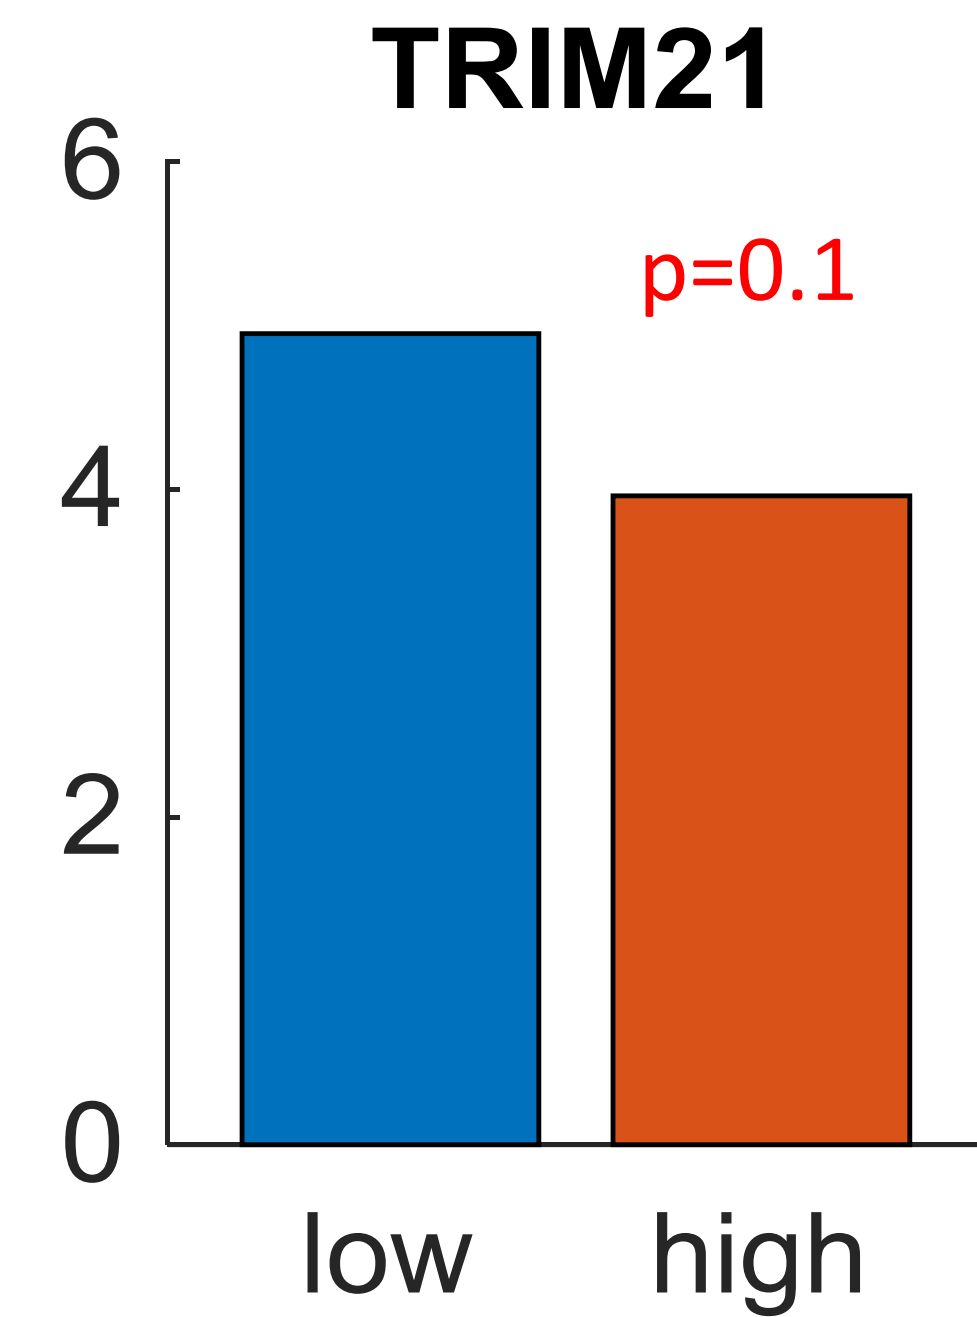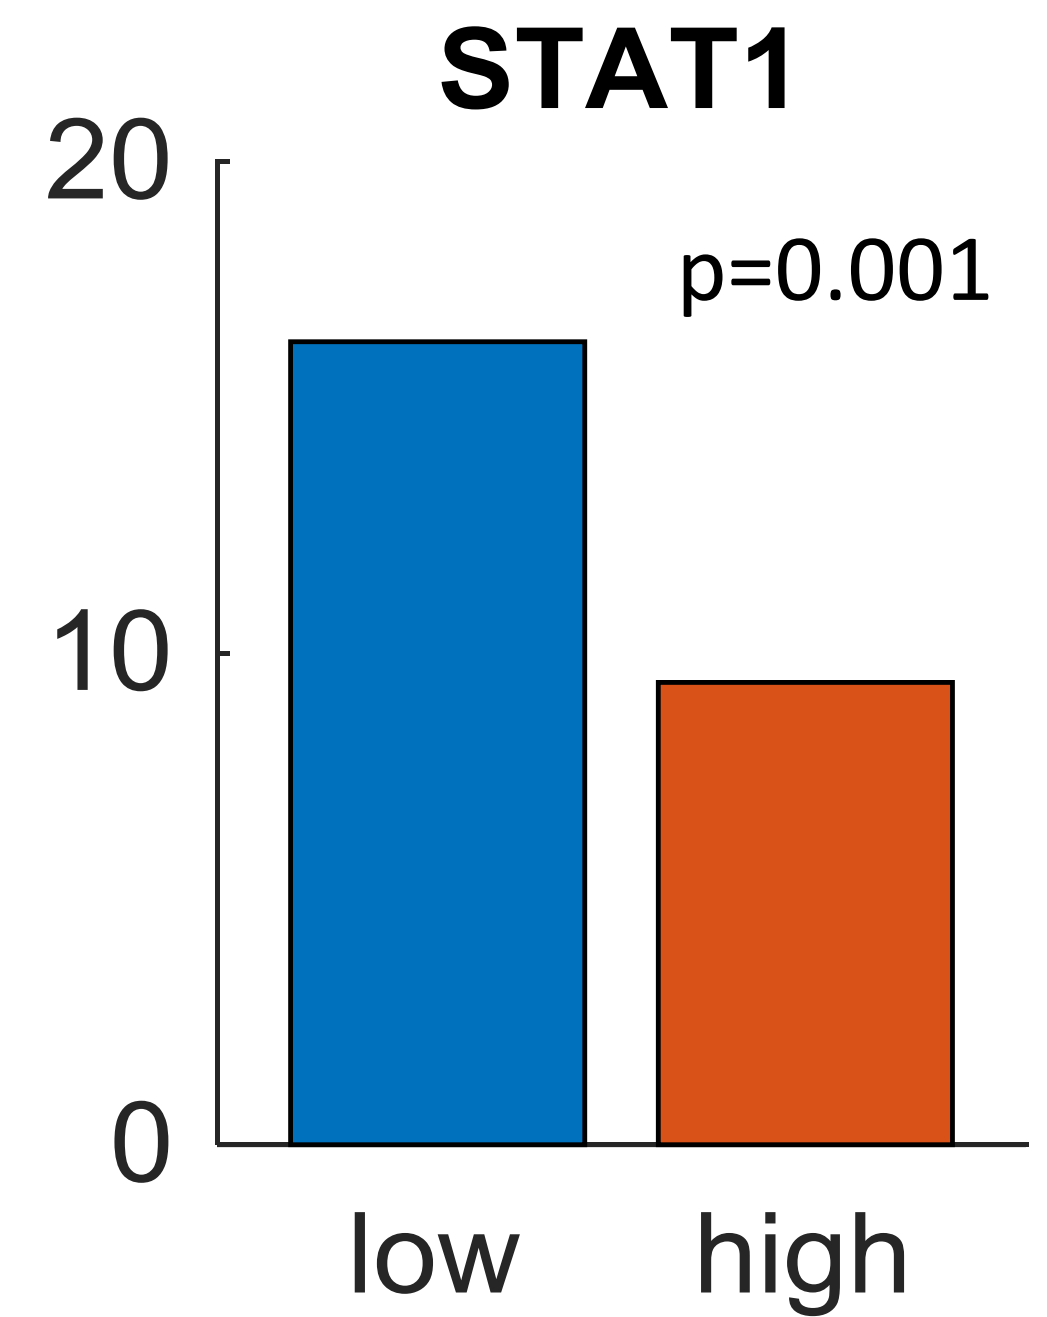

Supplement: supp [file elife_poa_e46339_Figure_2_figure_supplement_2.pdf › elife_poa_e46339_Figure_2_figure_supplement_2.pdf]

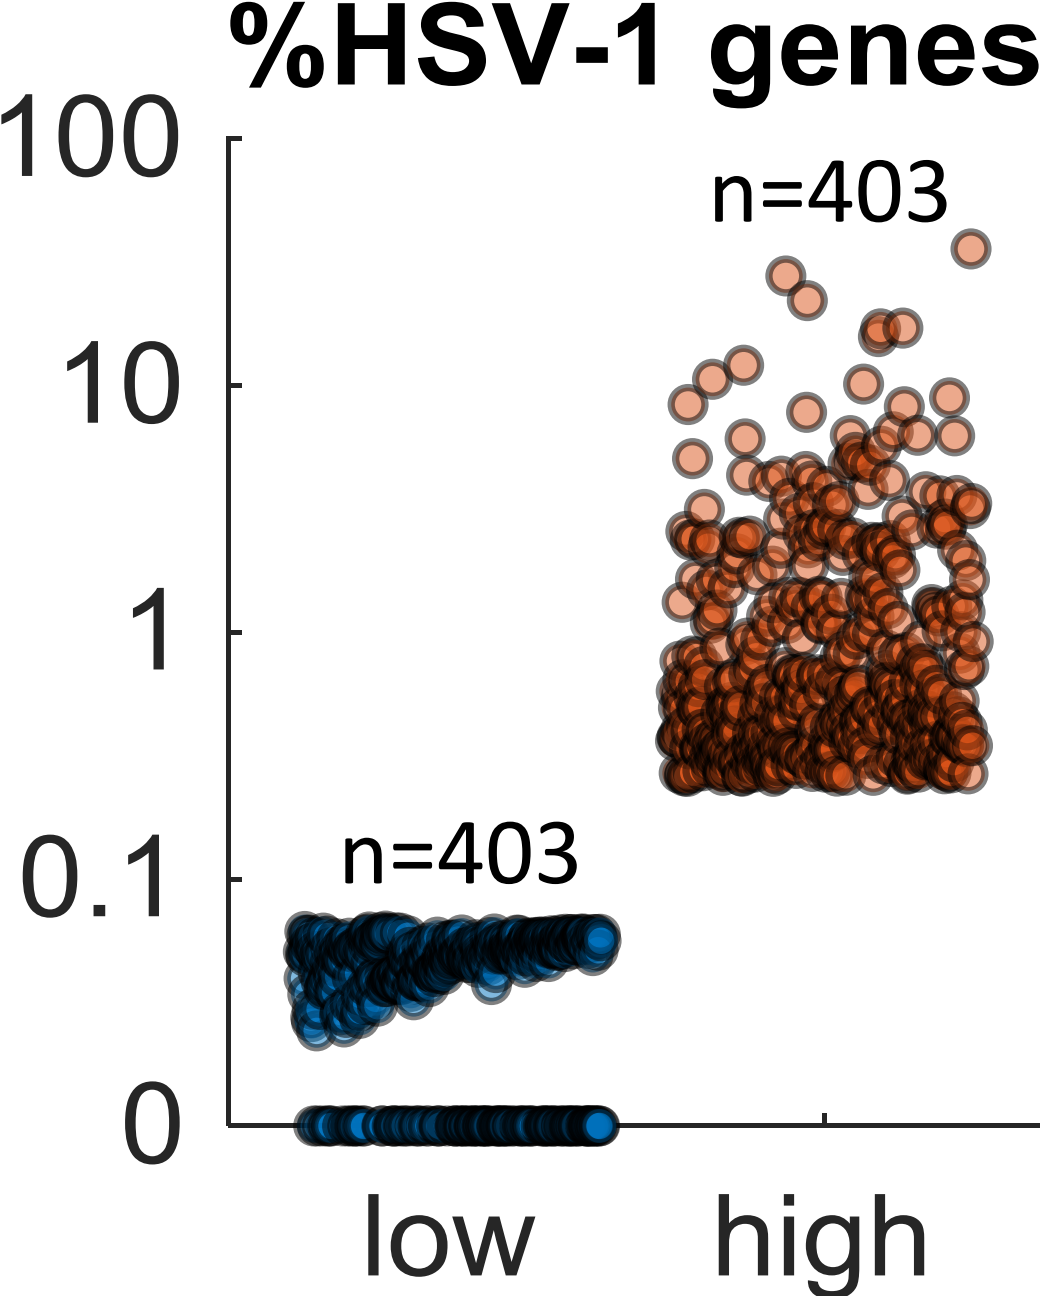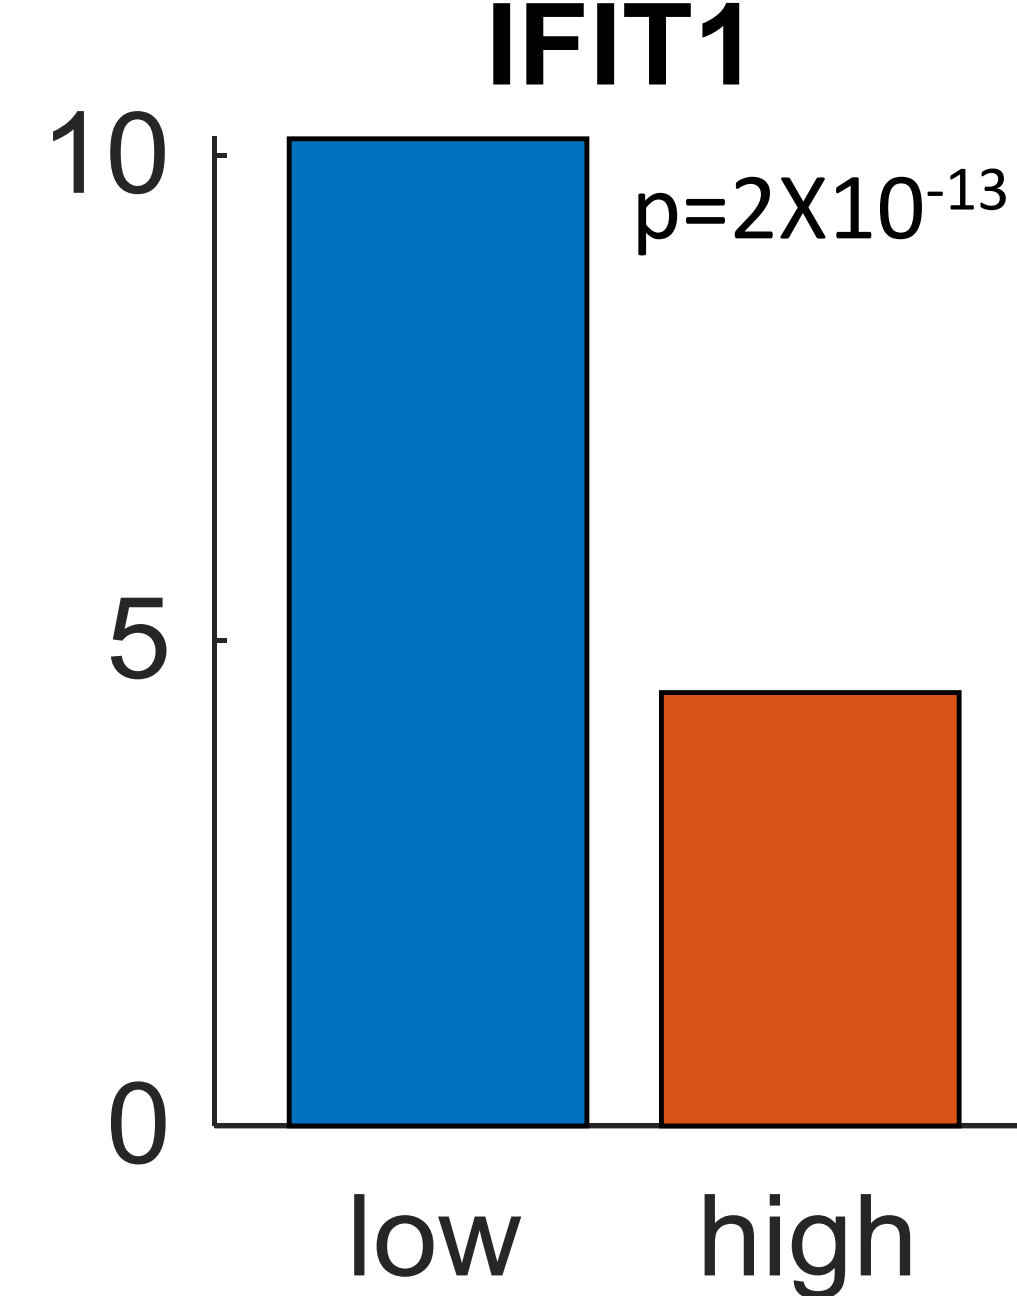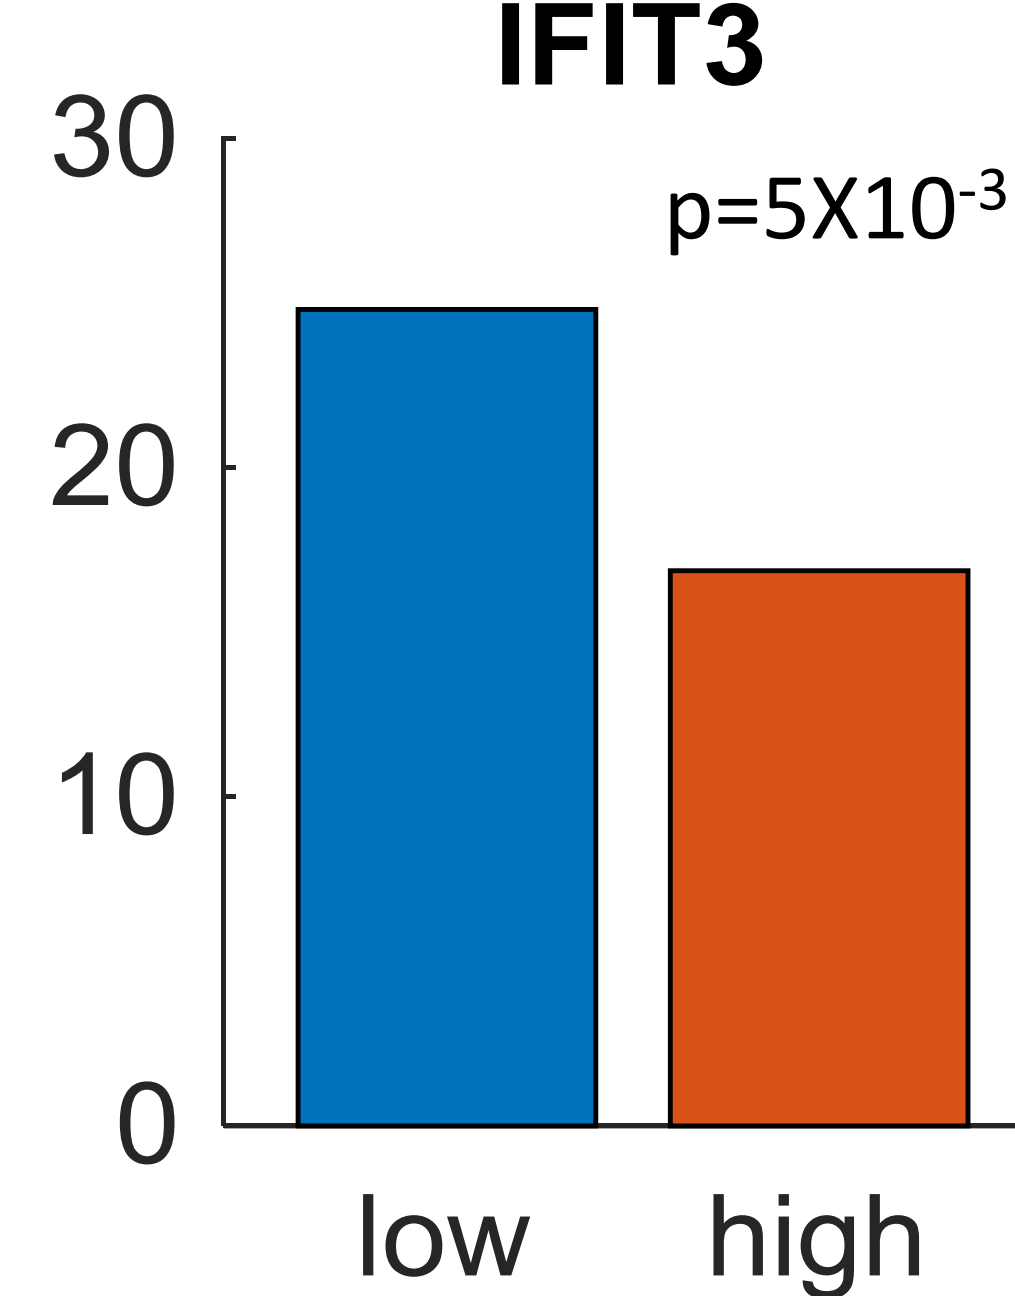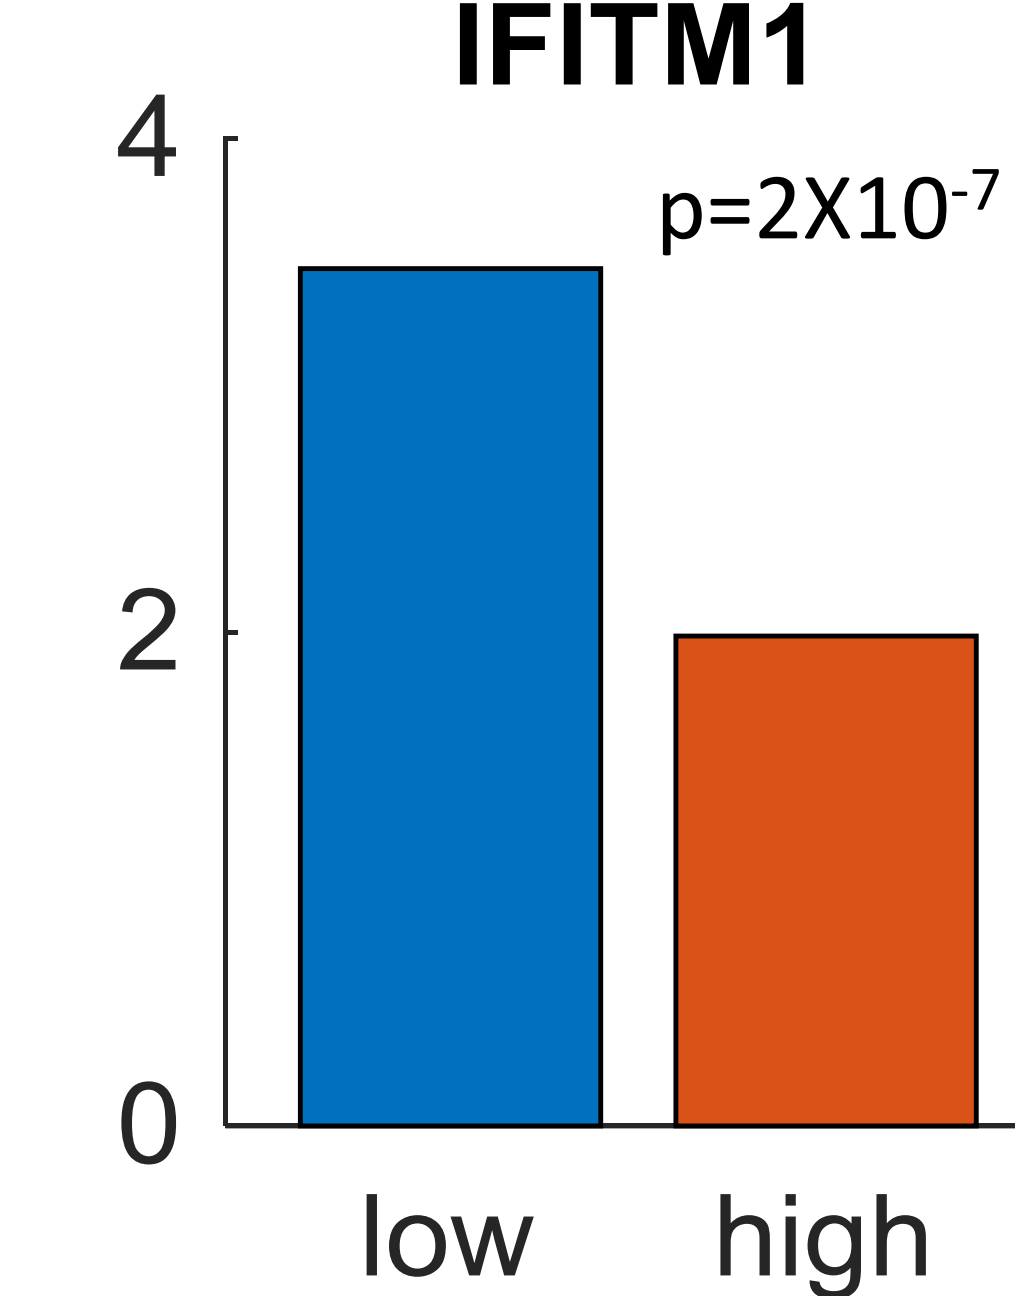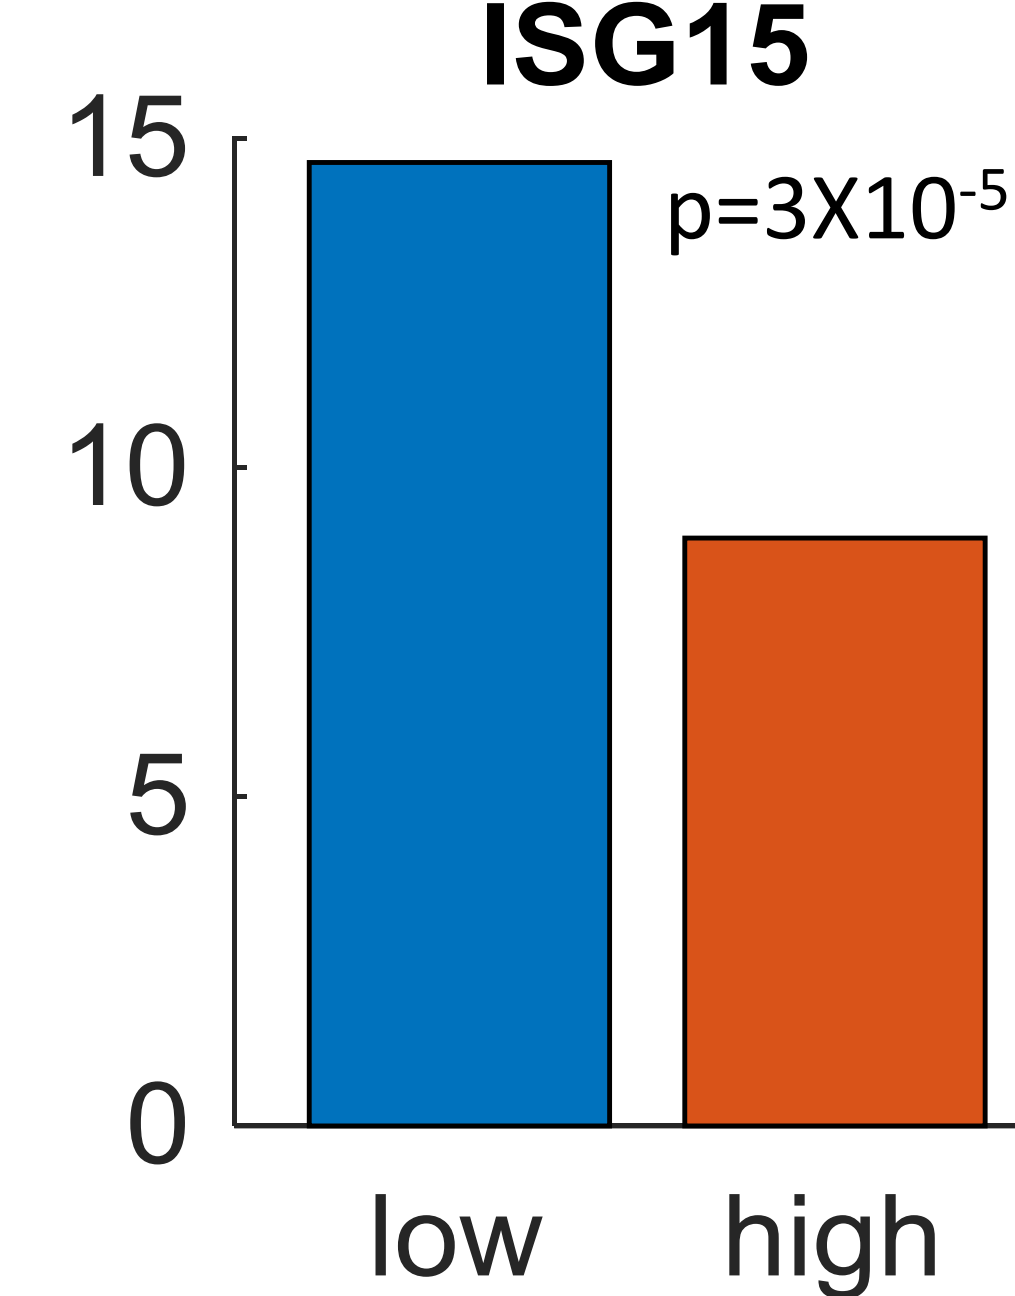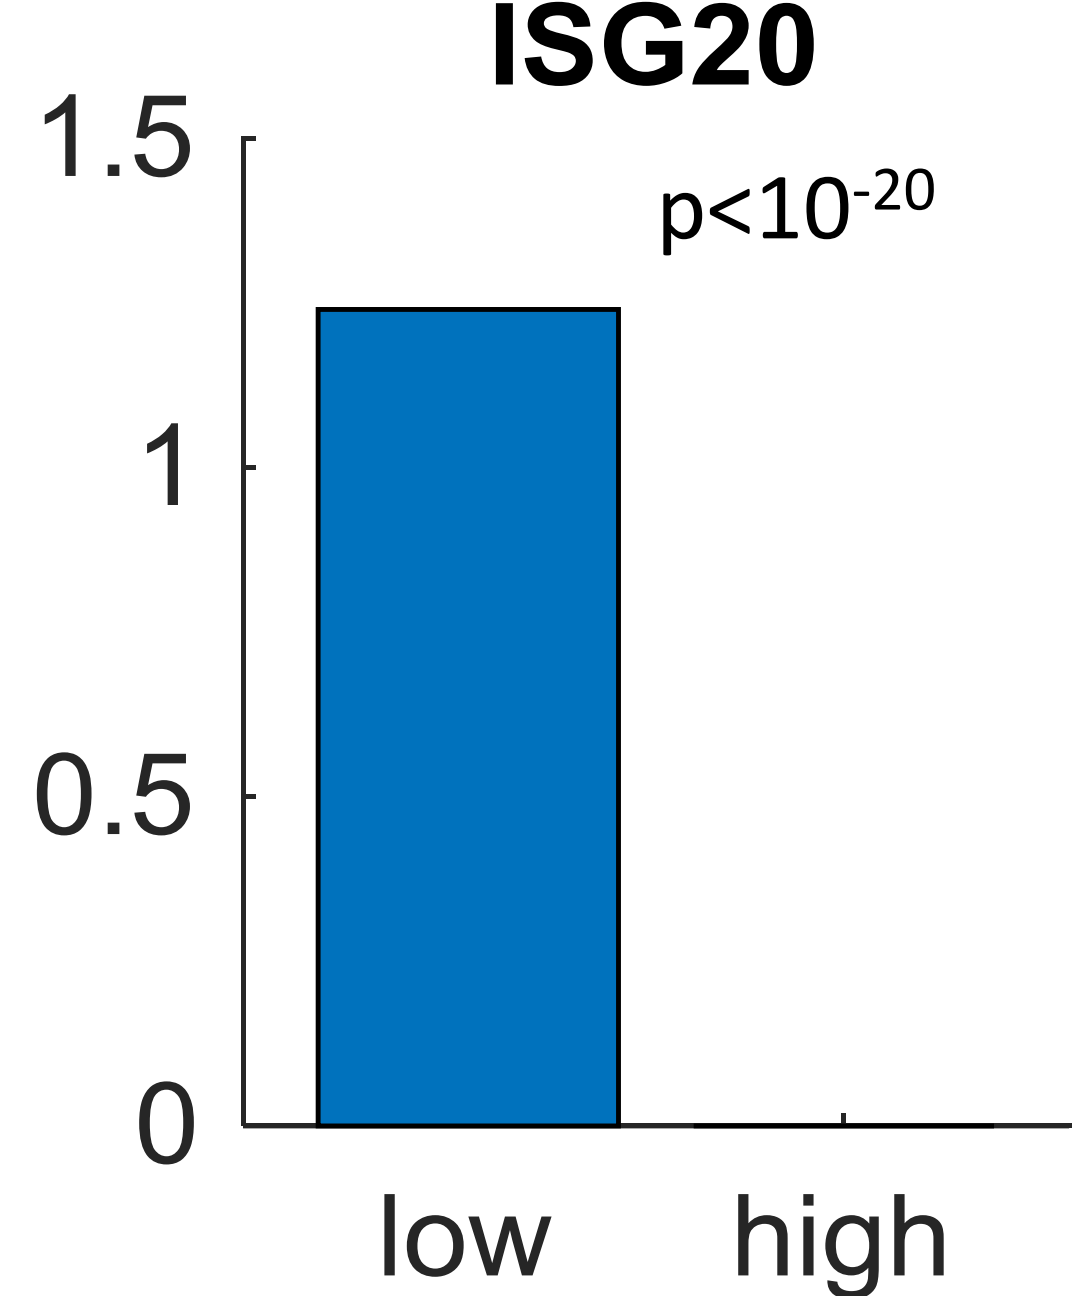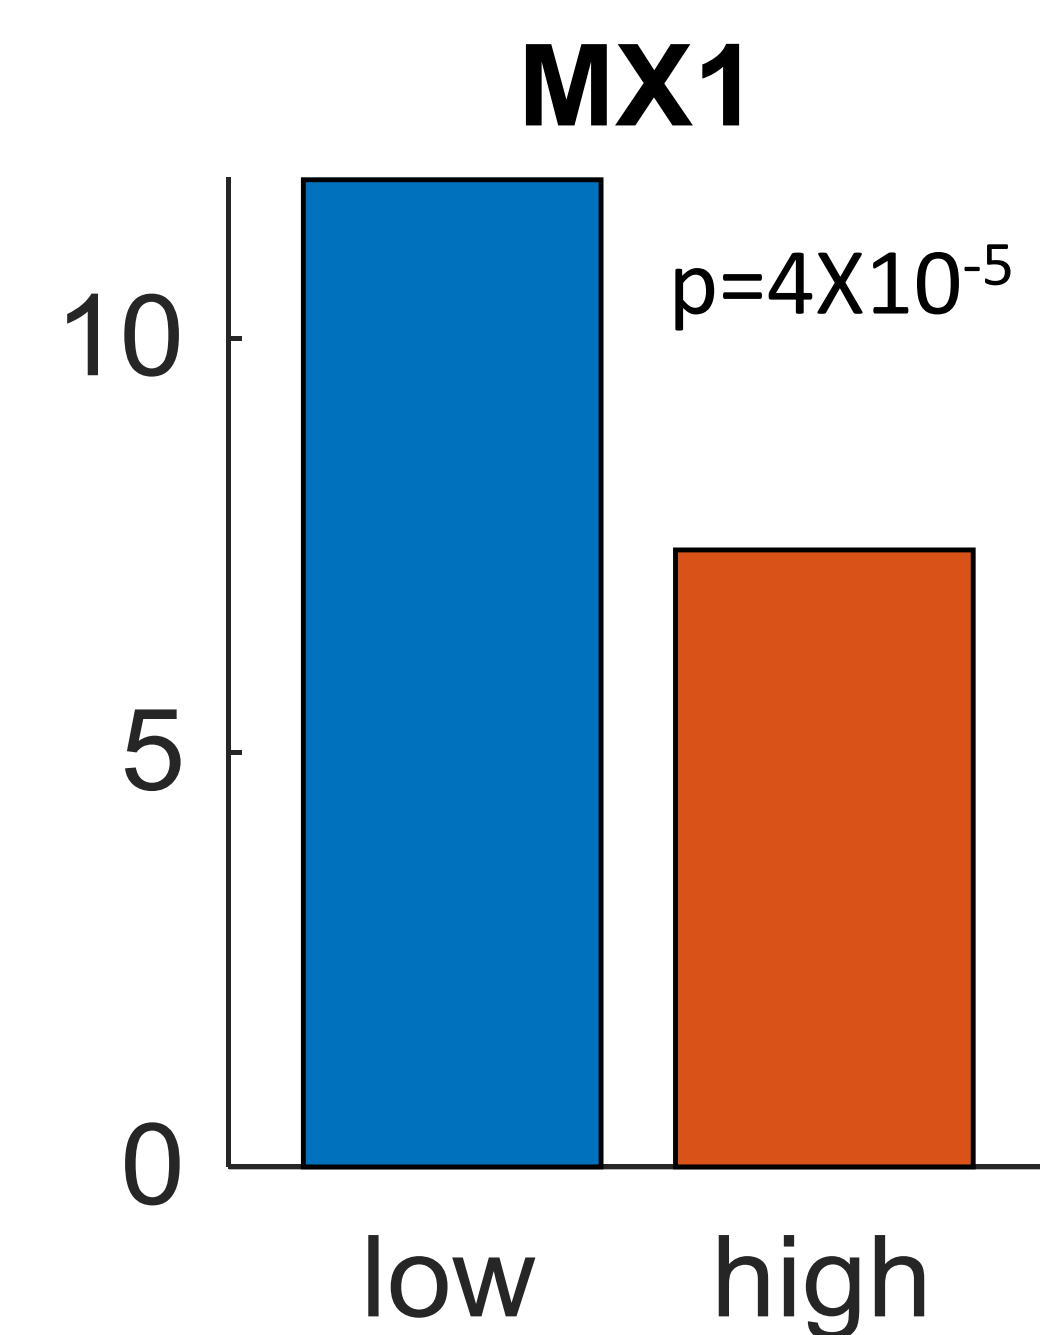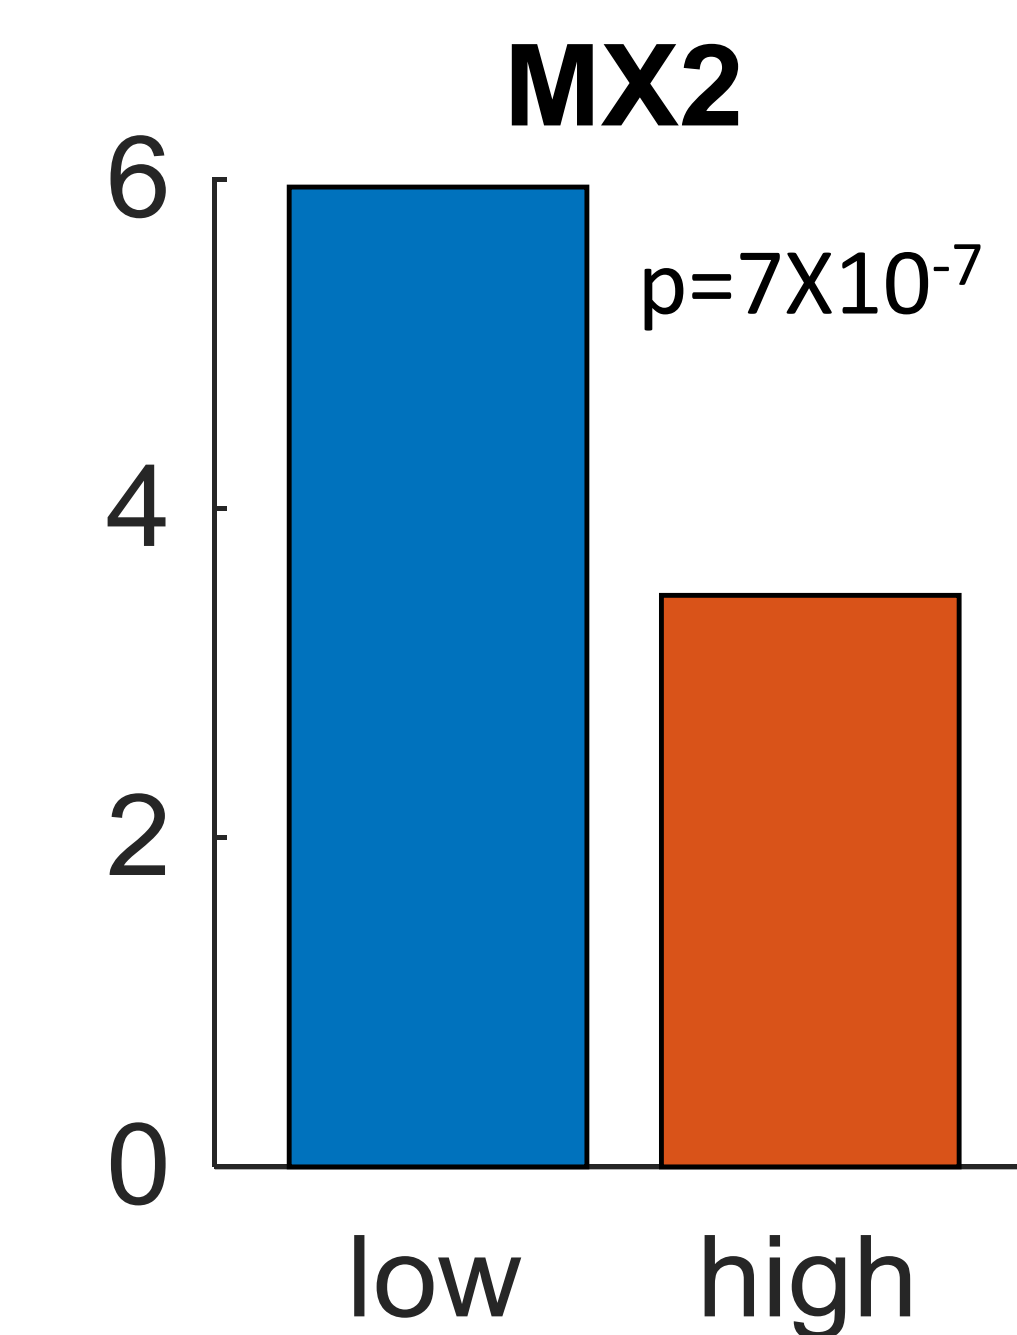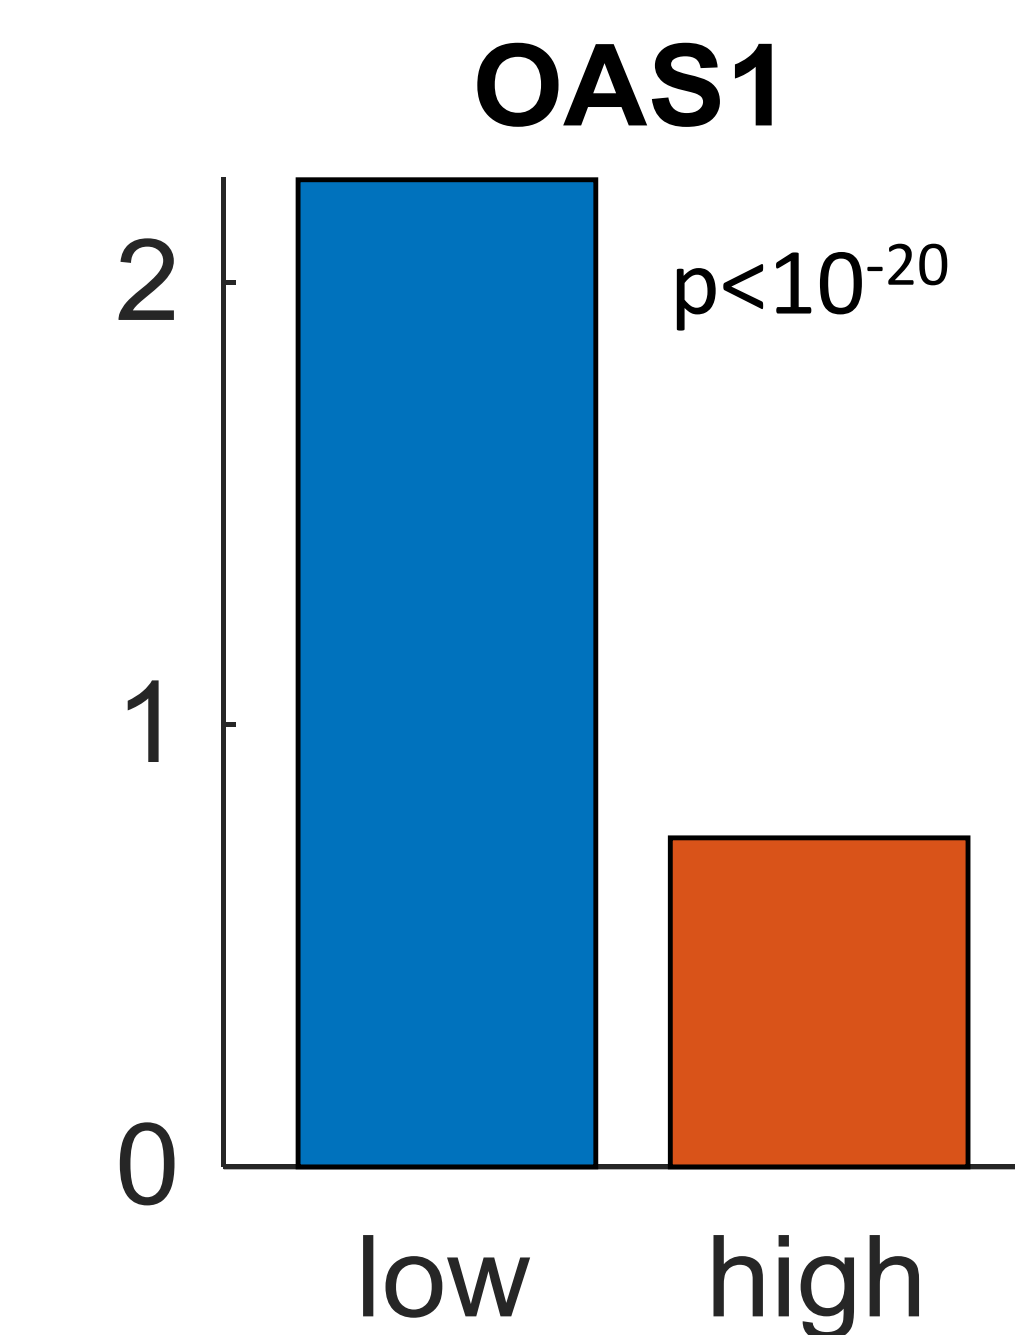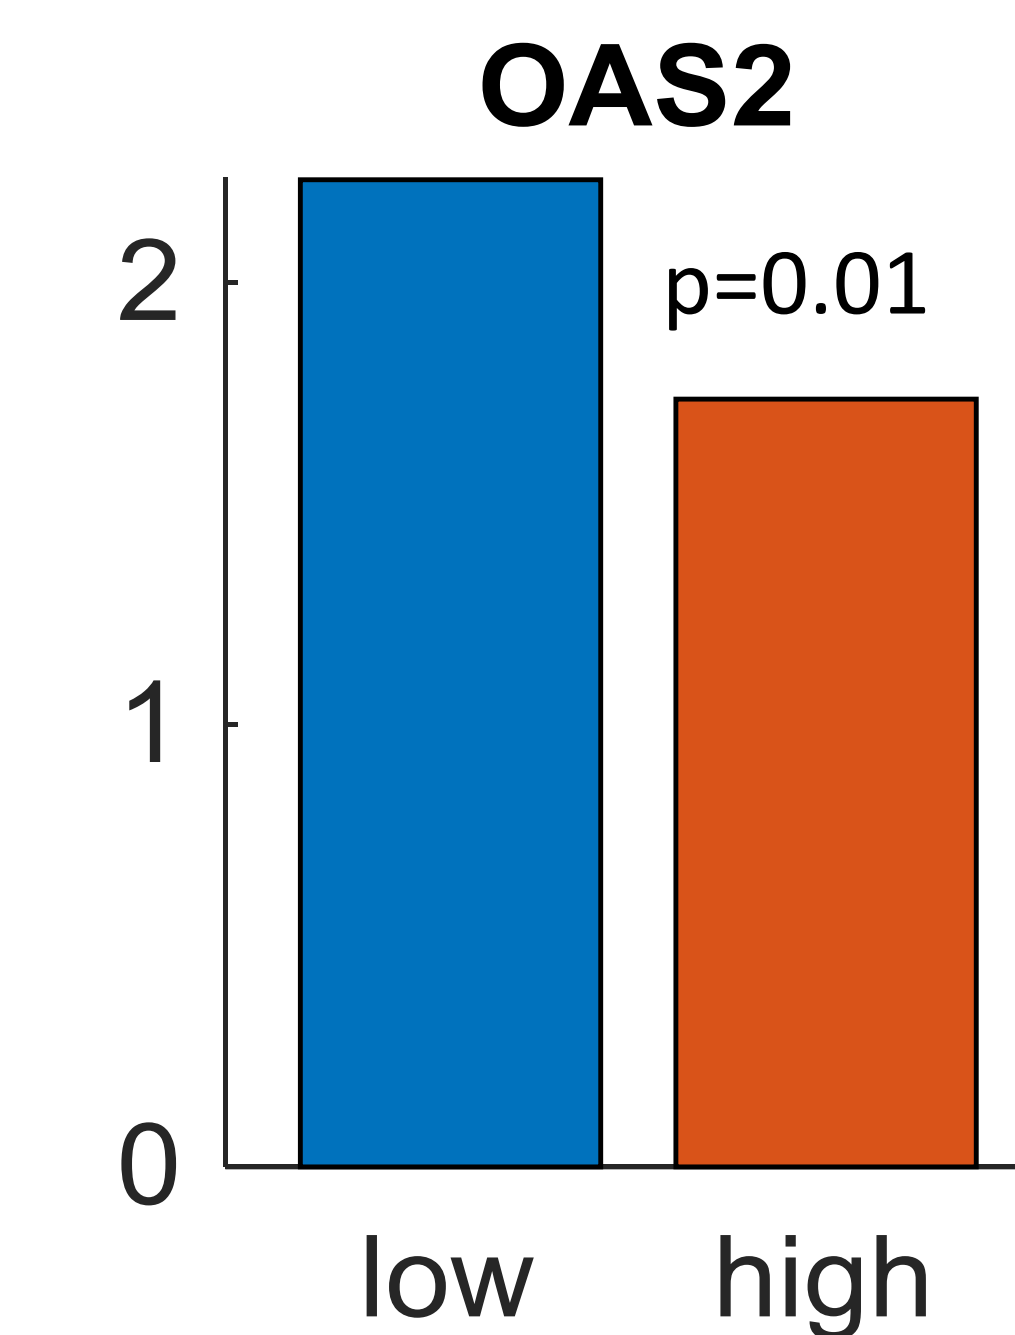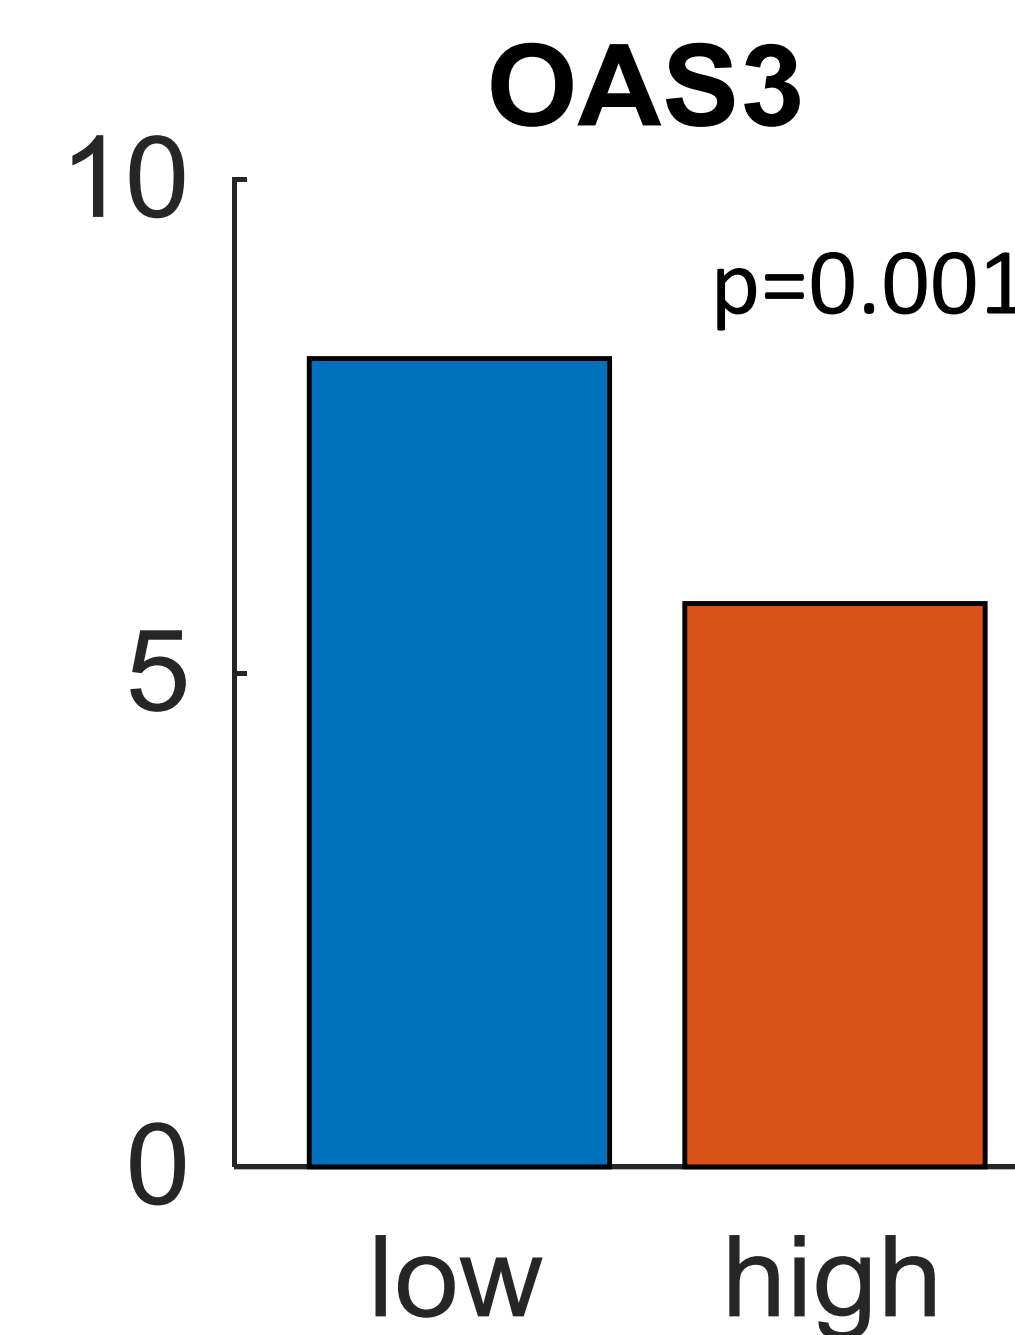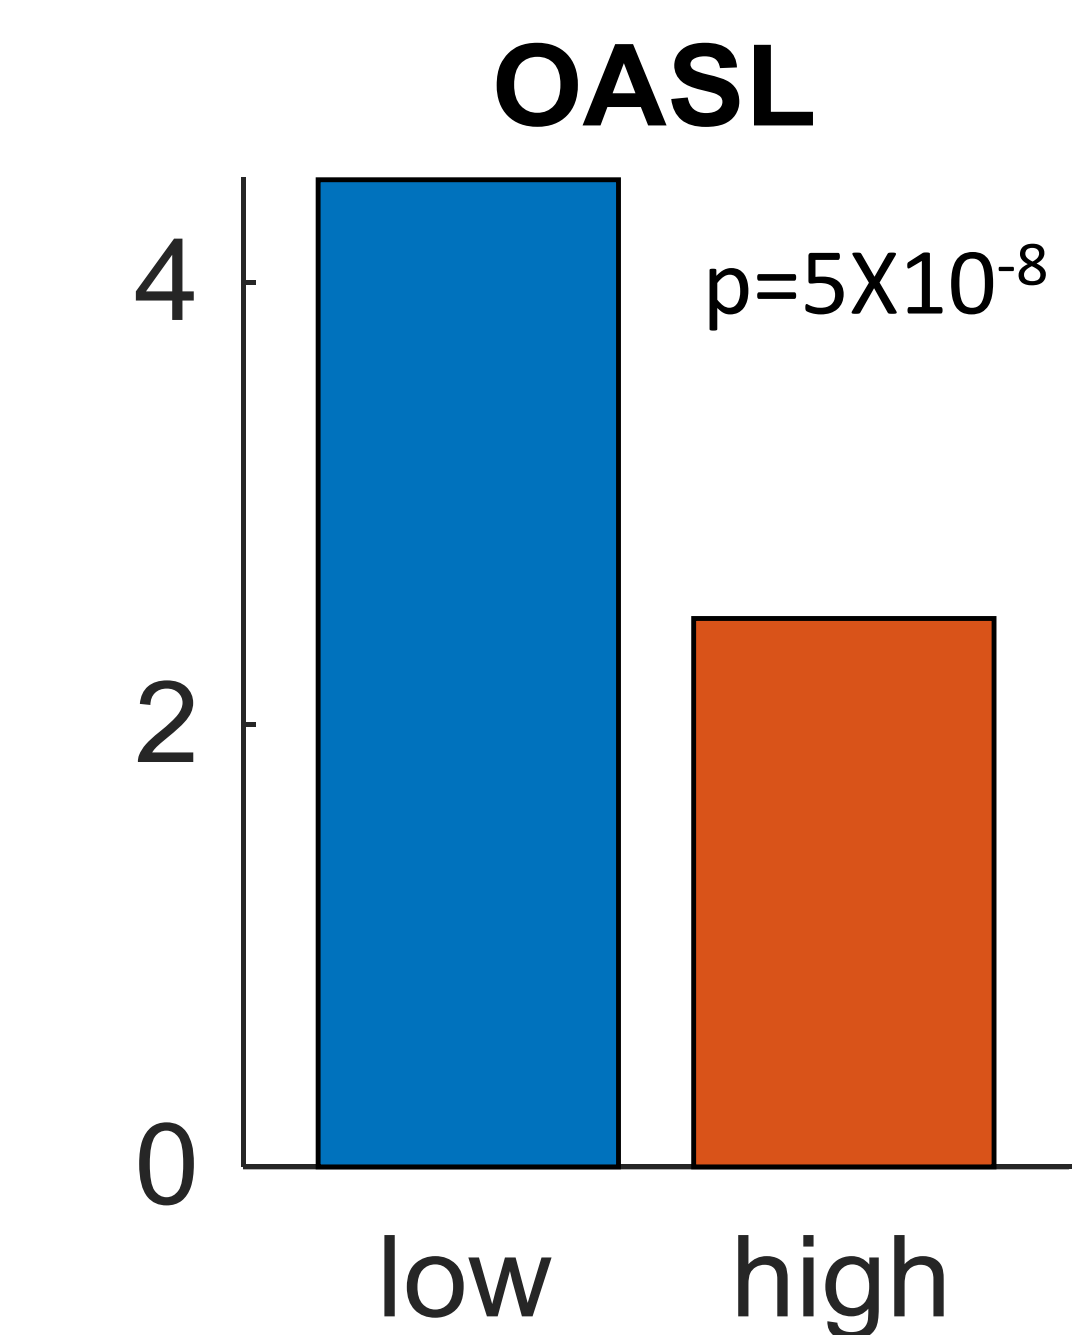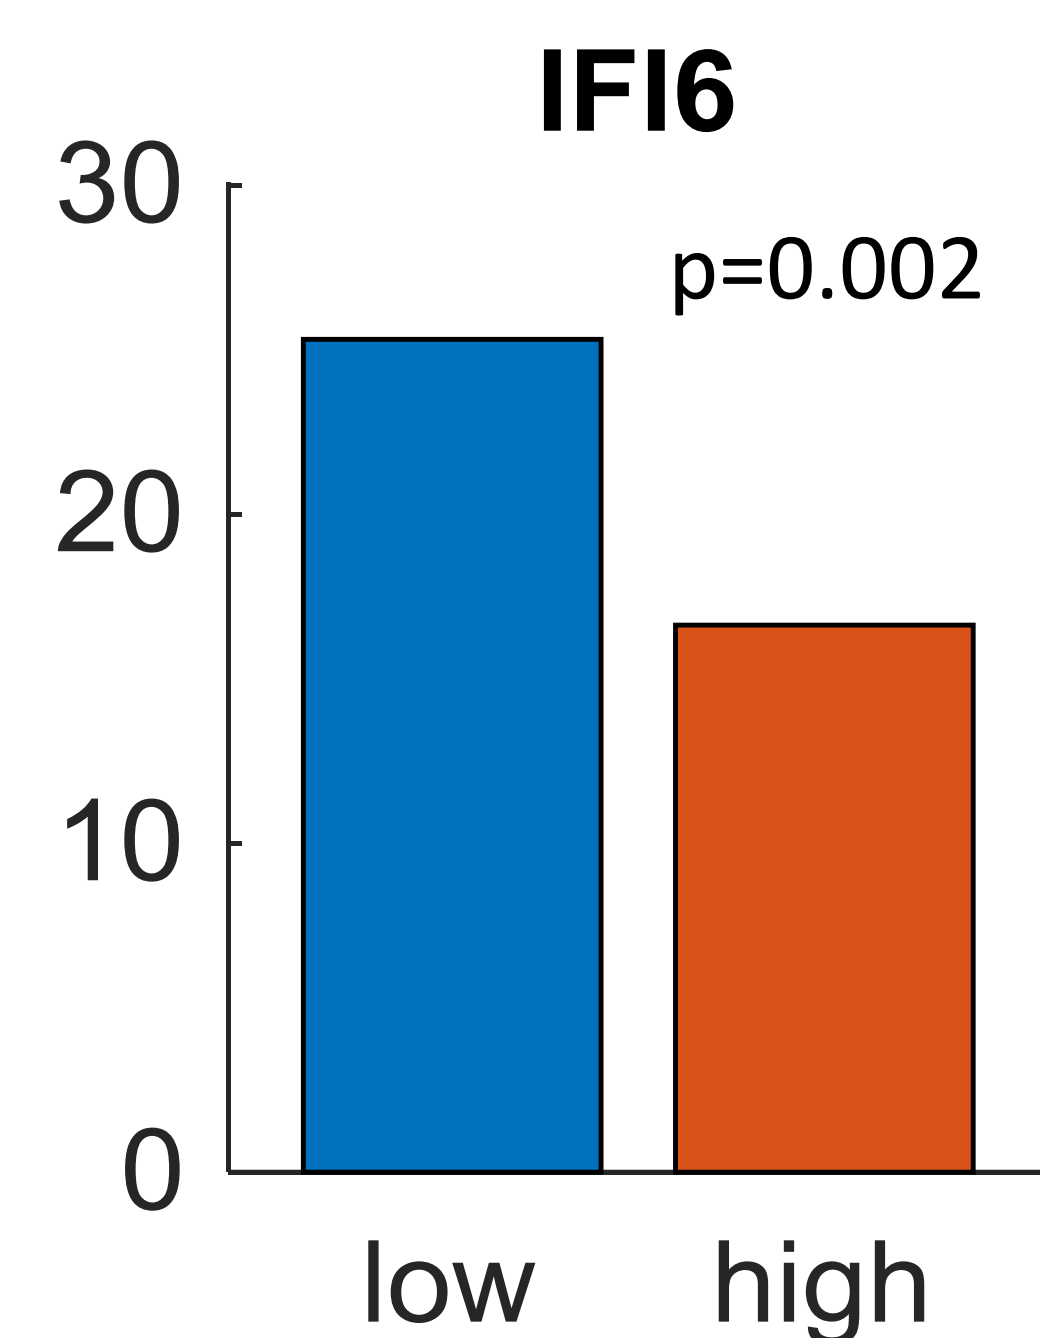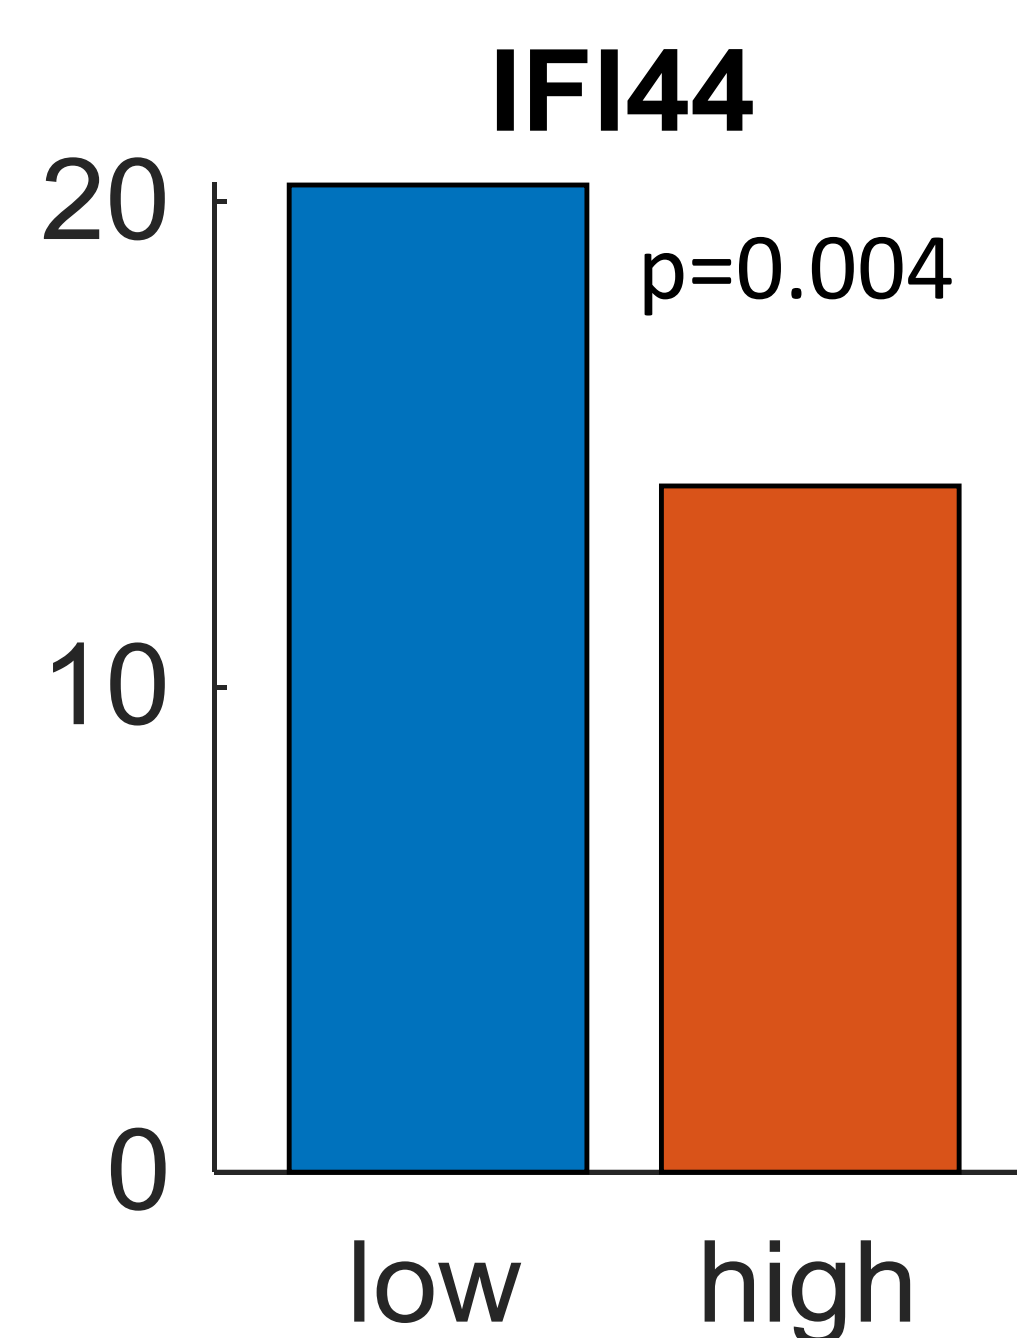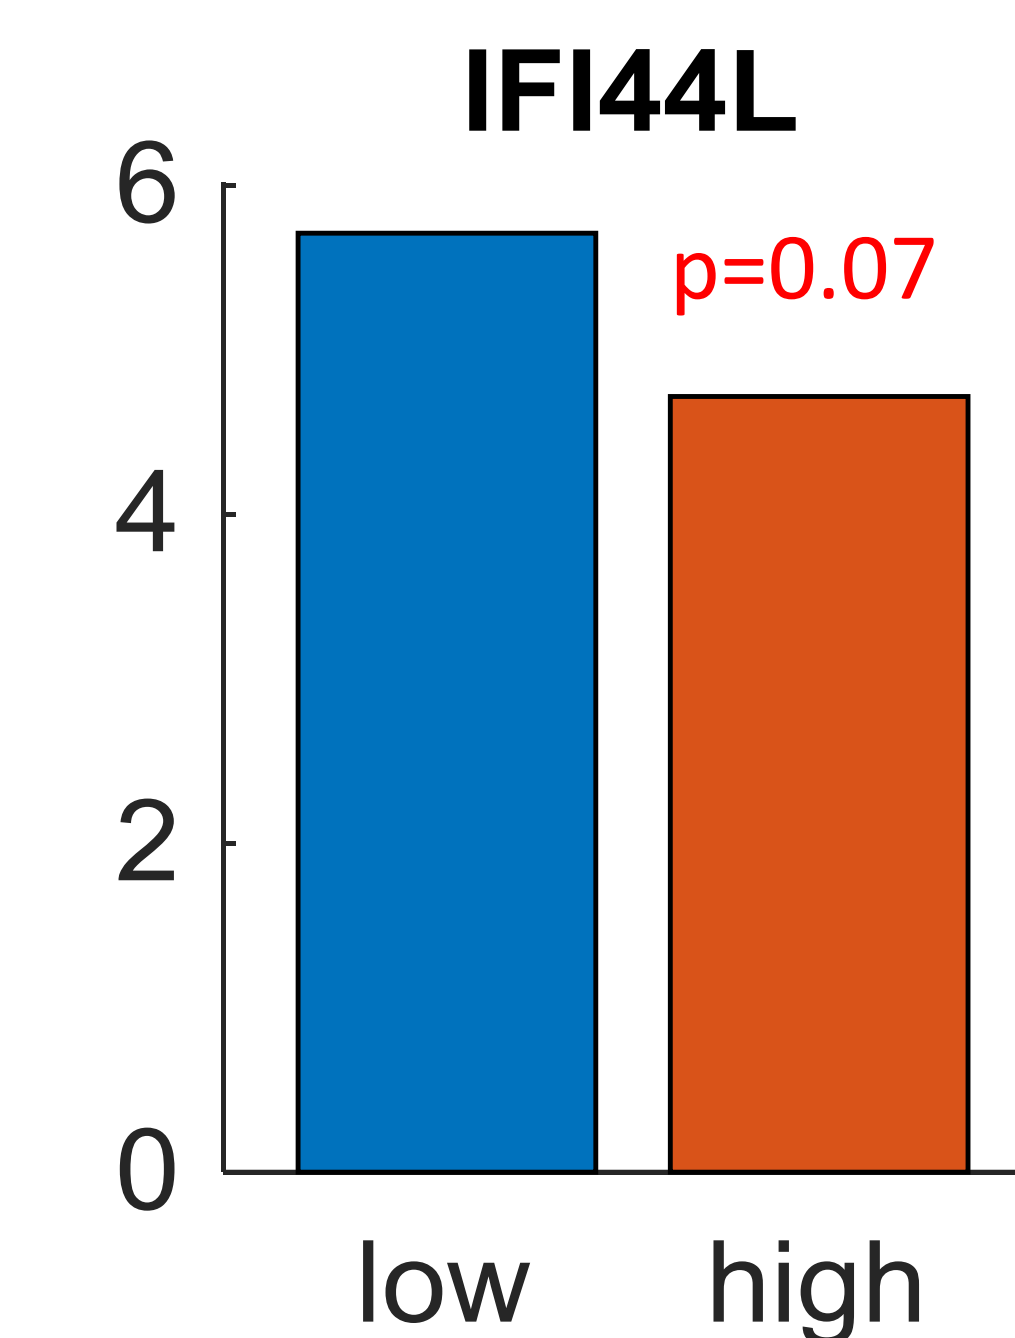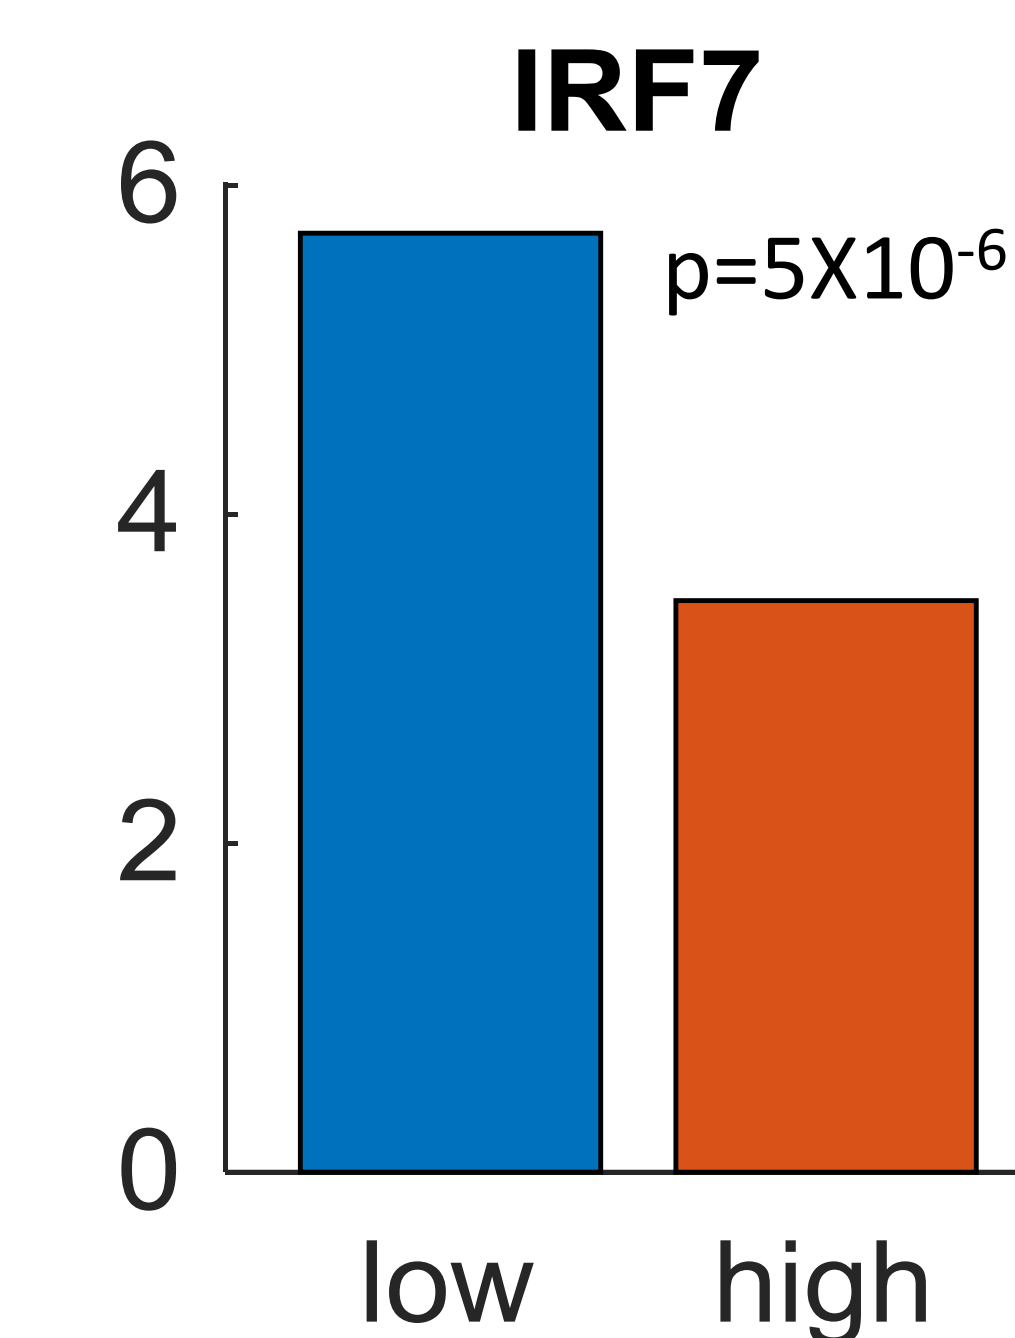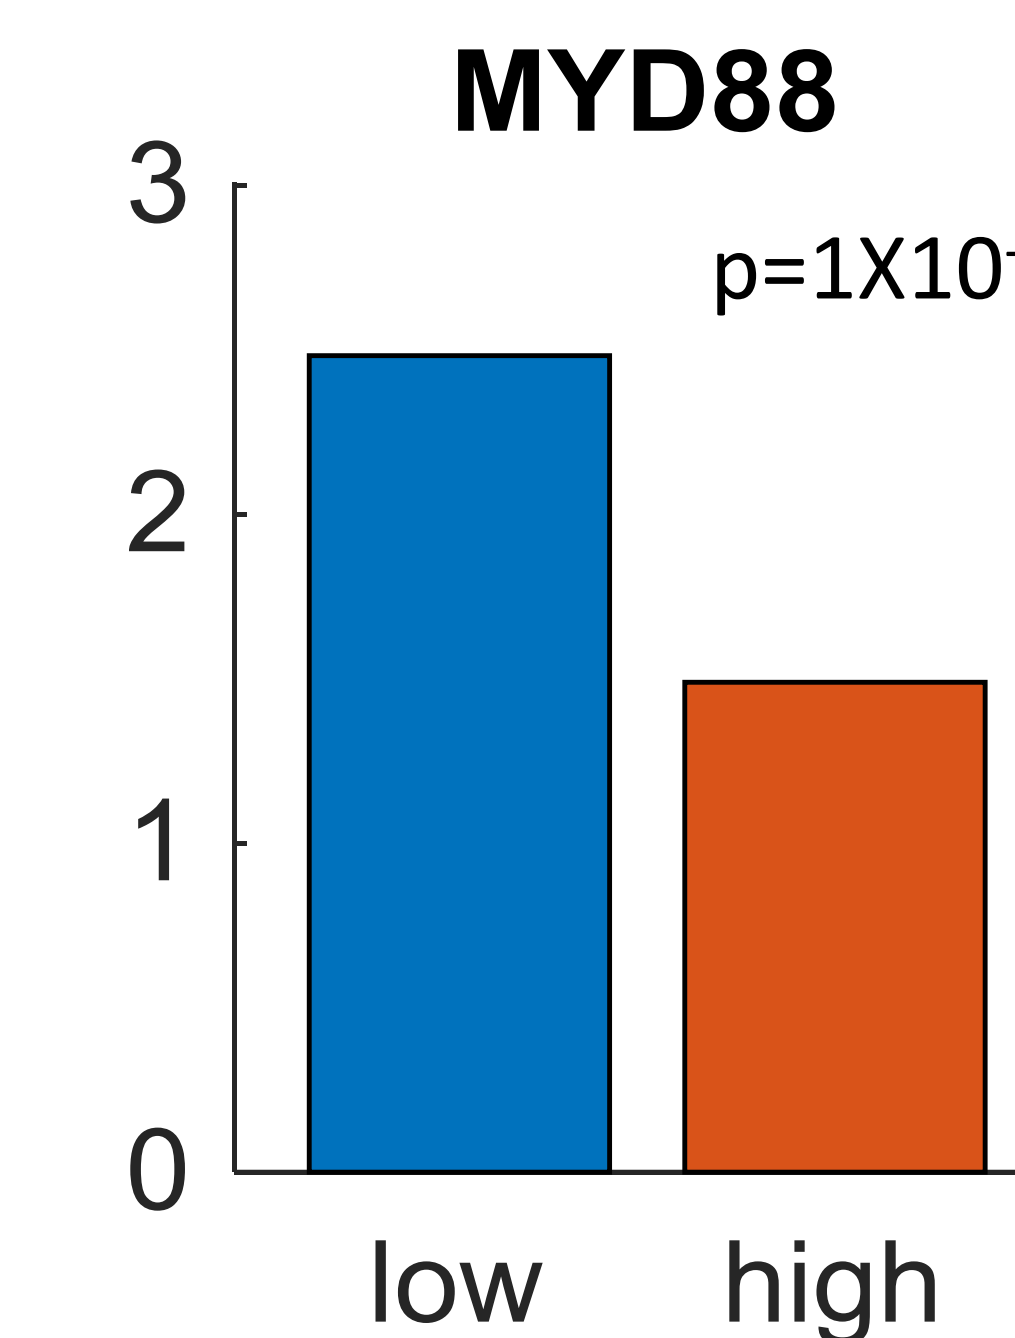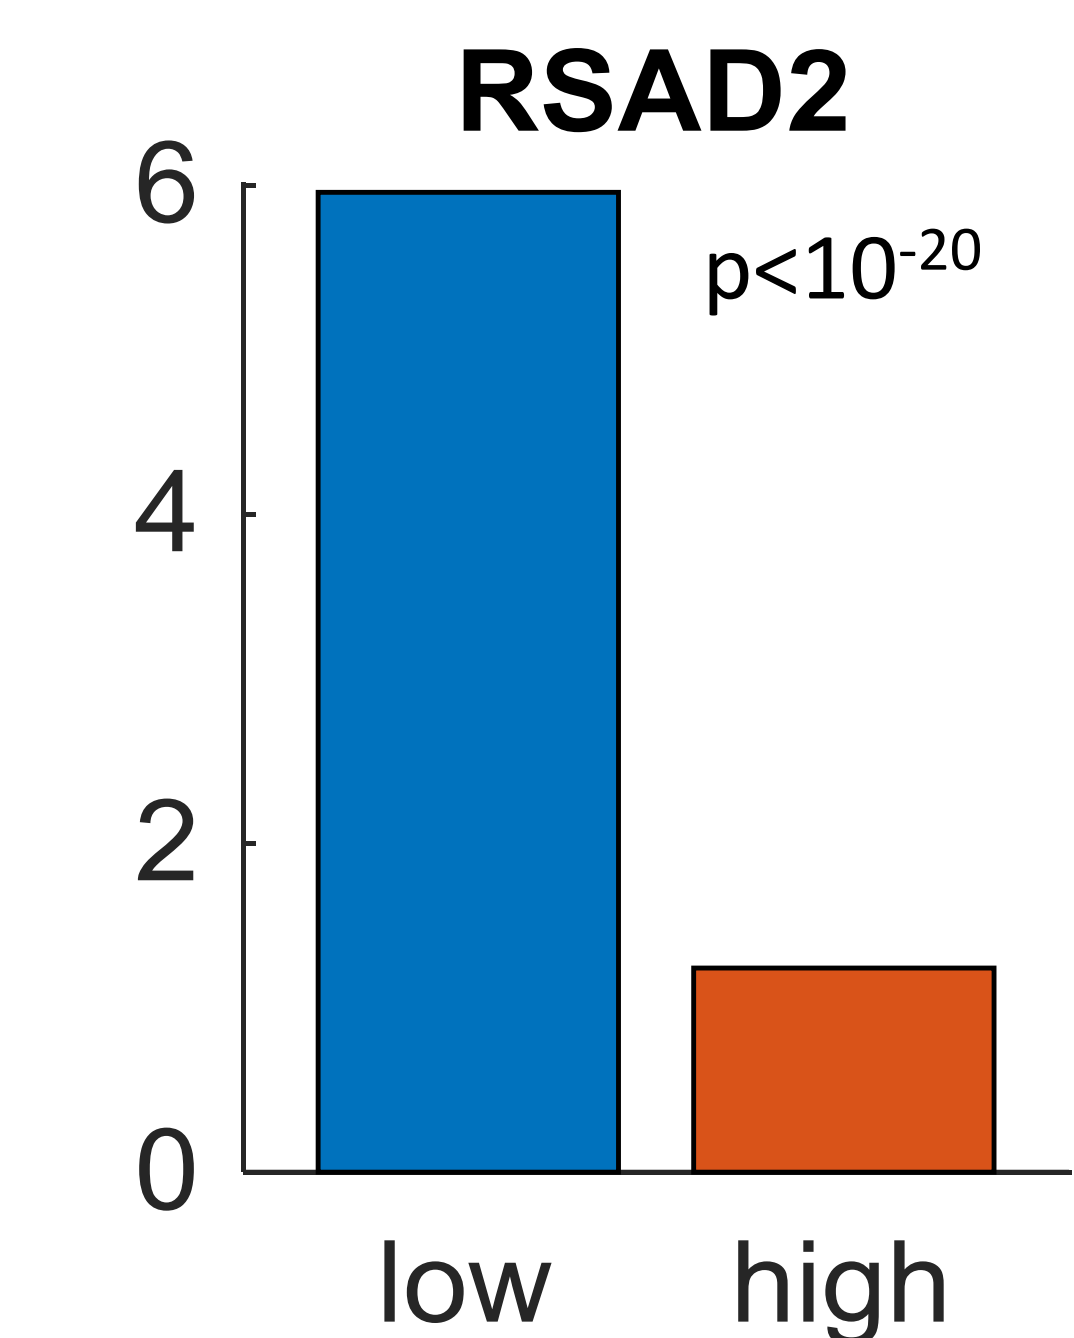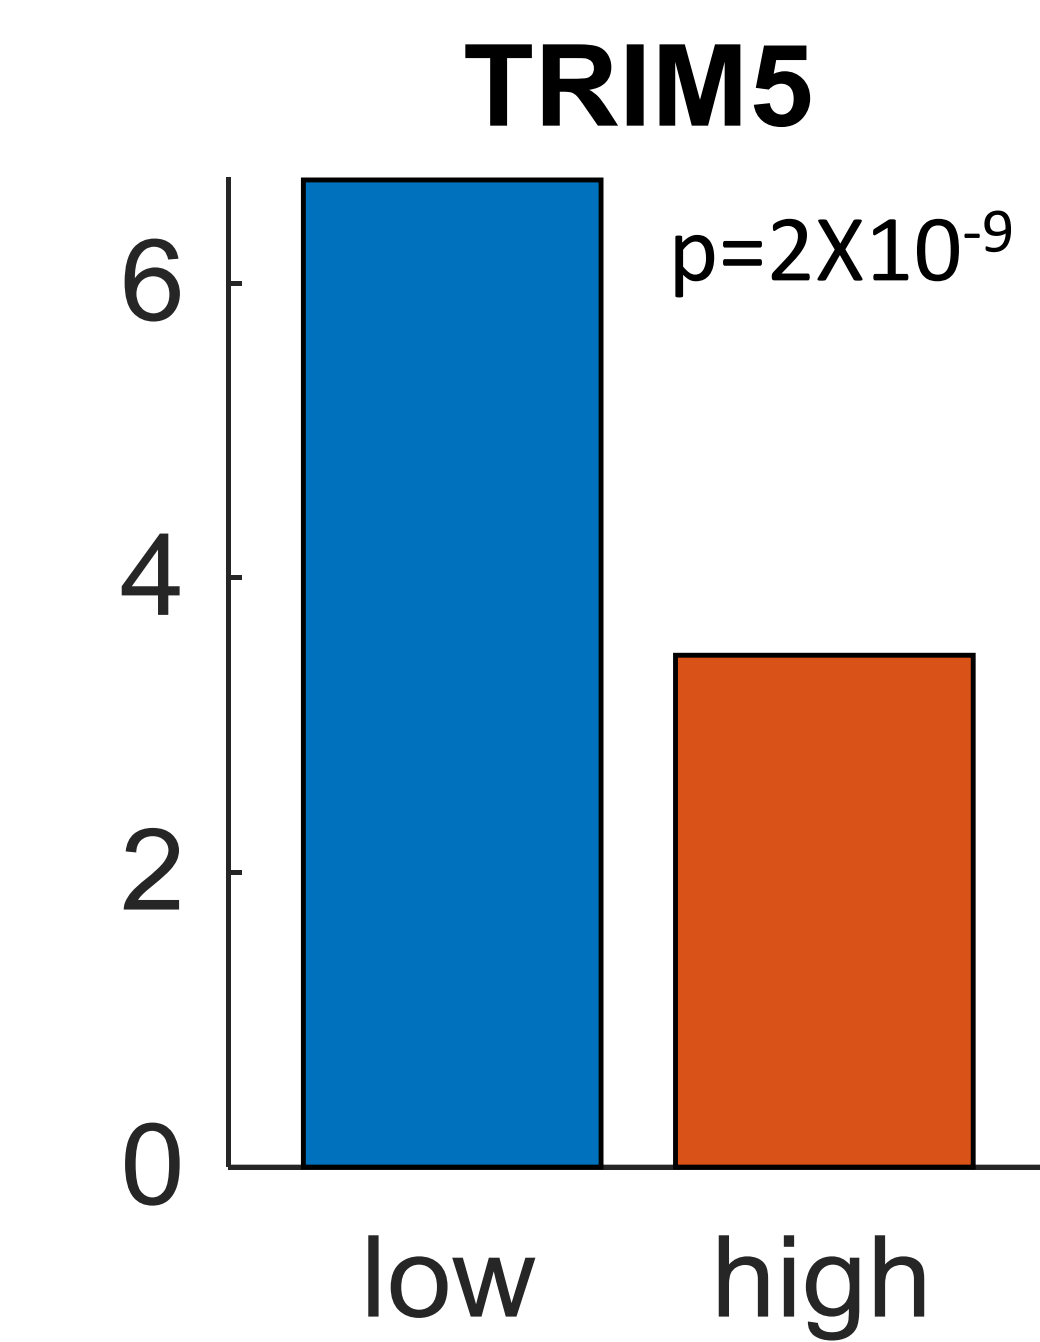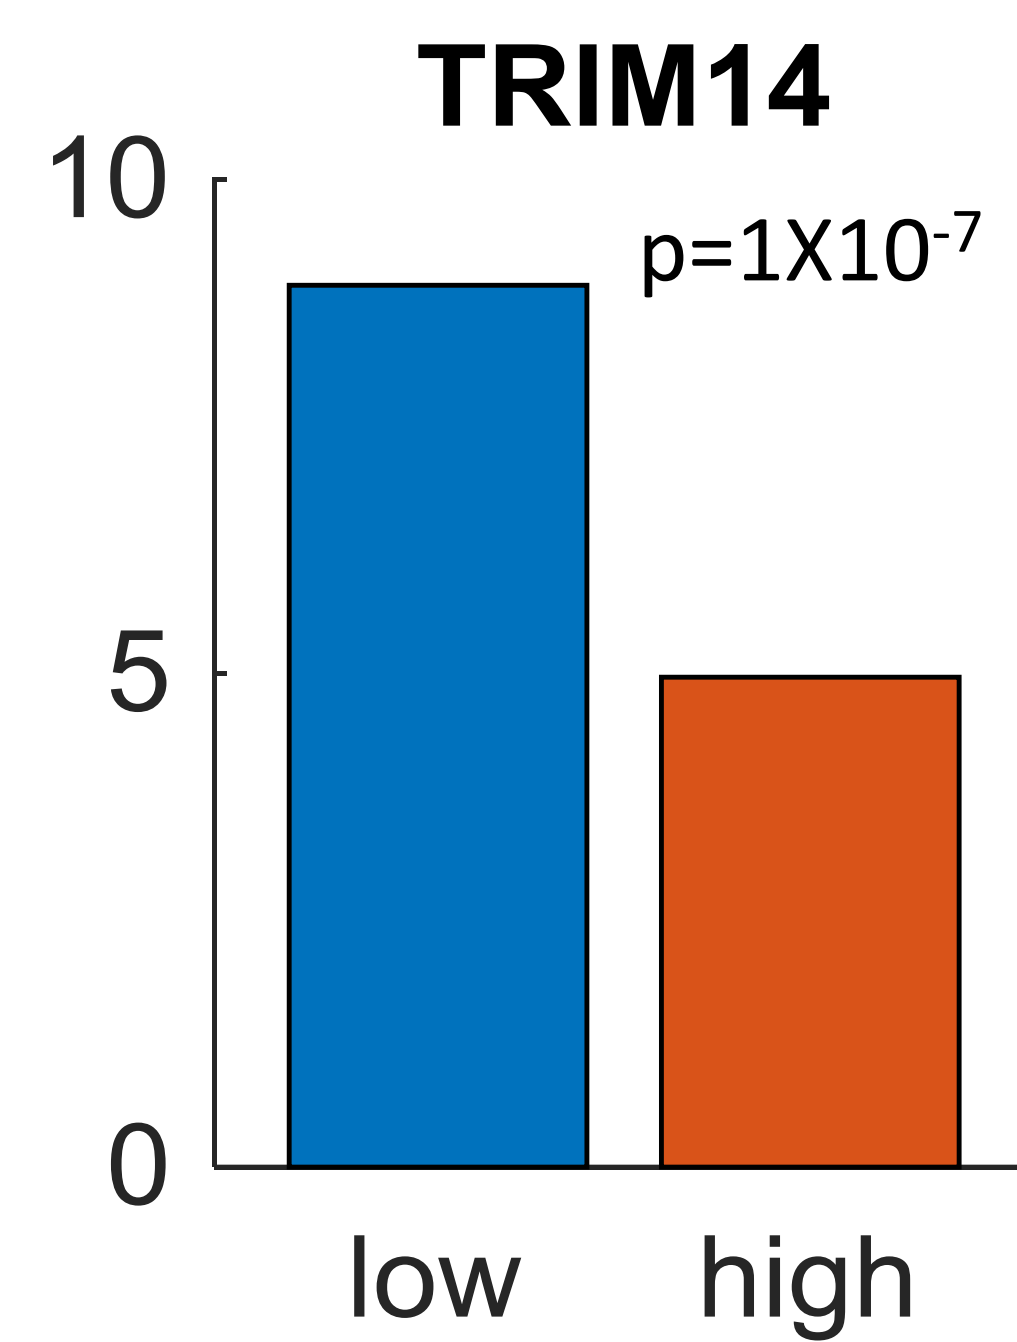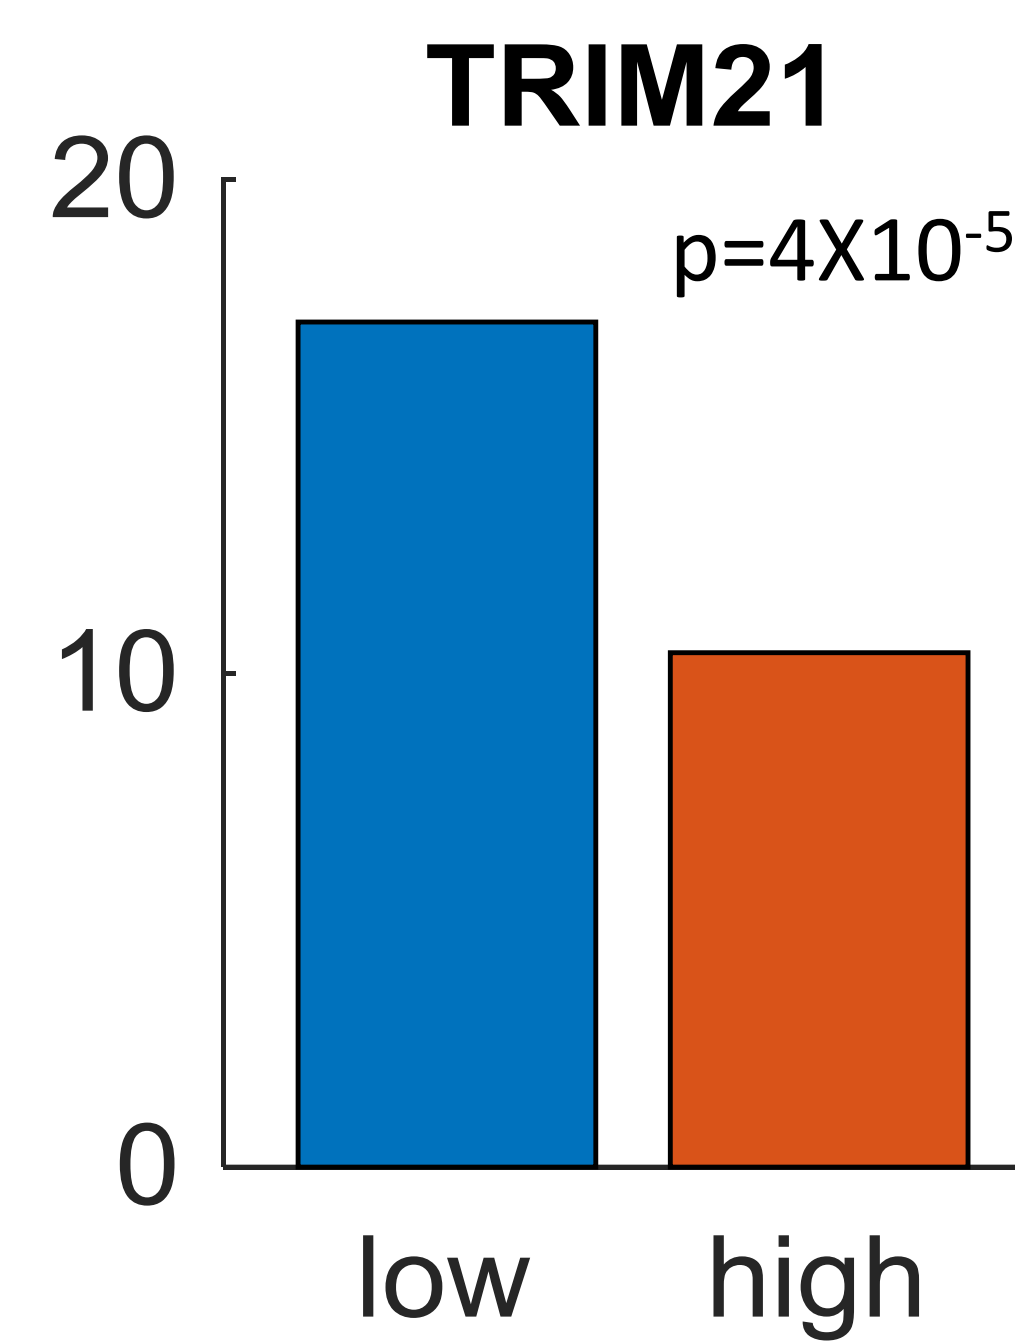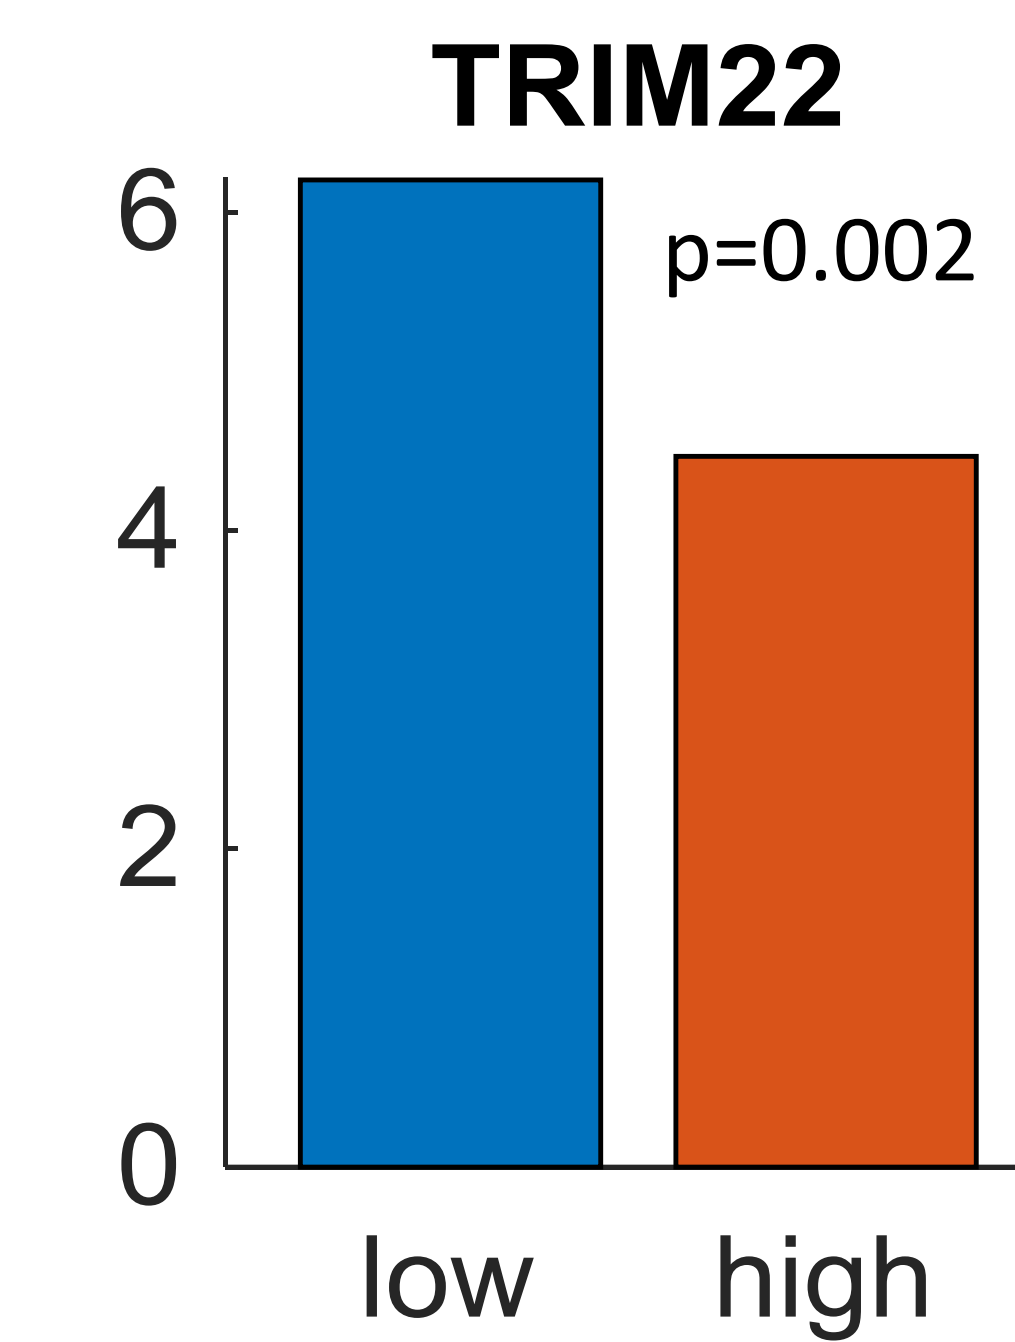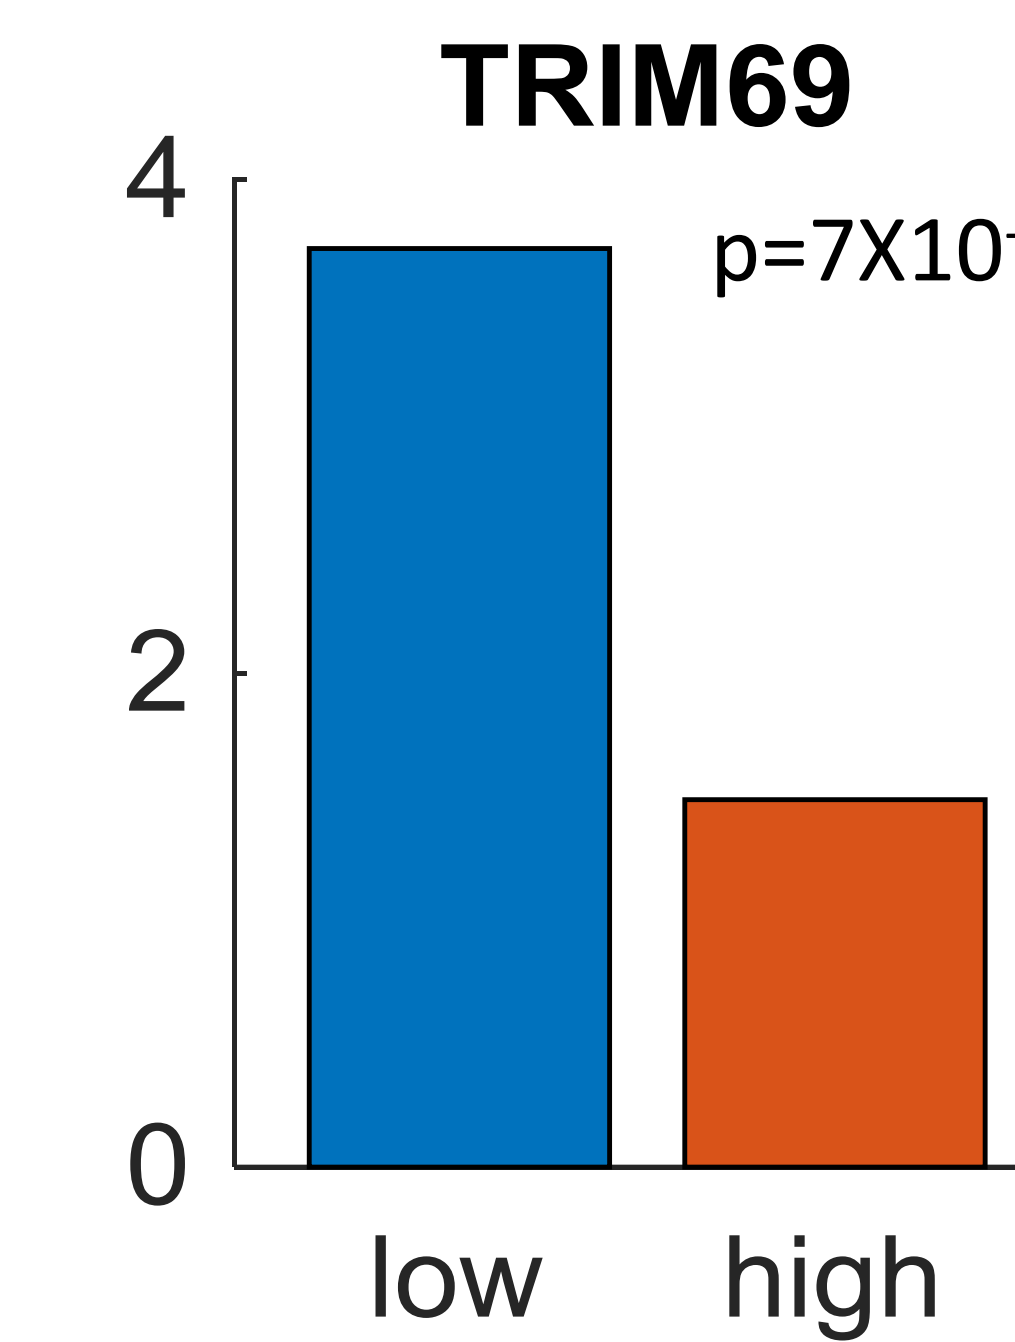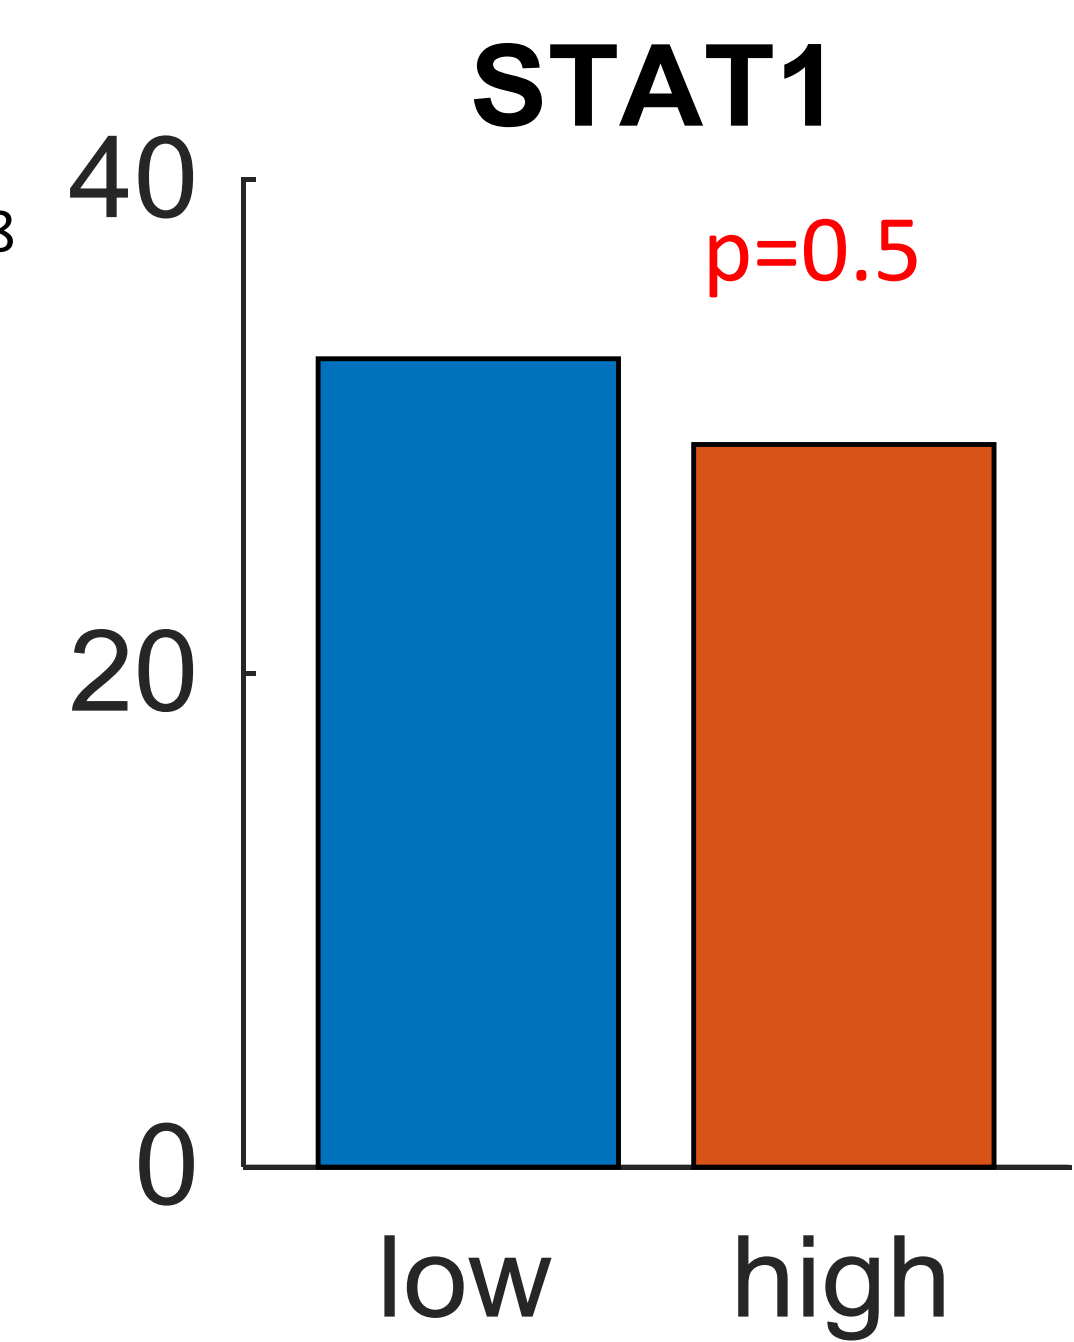

Supplement: supp [file elife_poa_e46339_Figure_3_figure_supplement_1.pdf › elife_poa_e46339_Figure_3_figure_supplement_1.pdf]

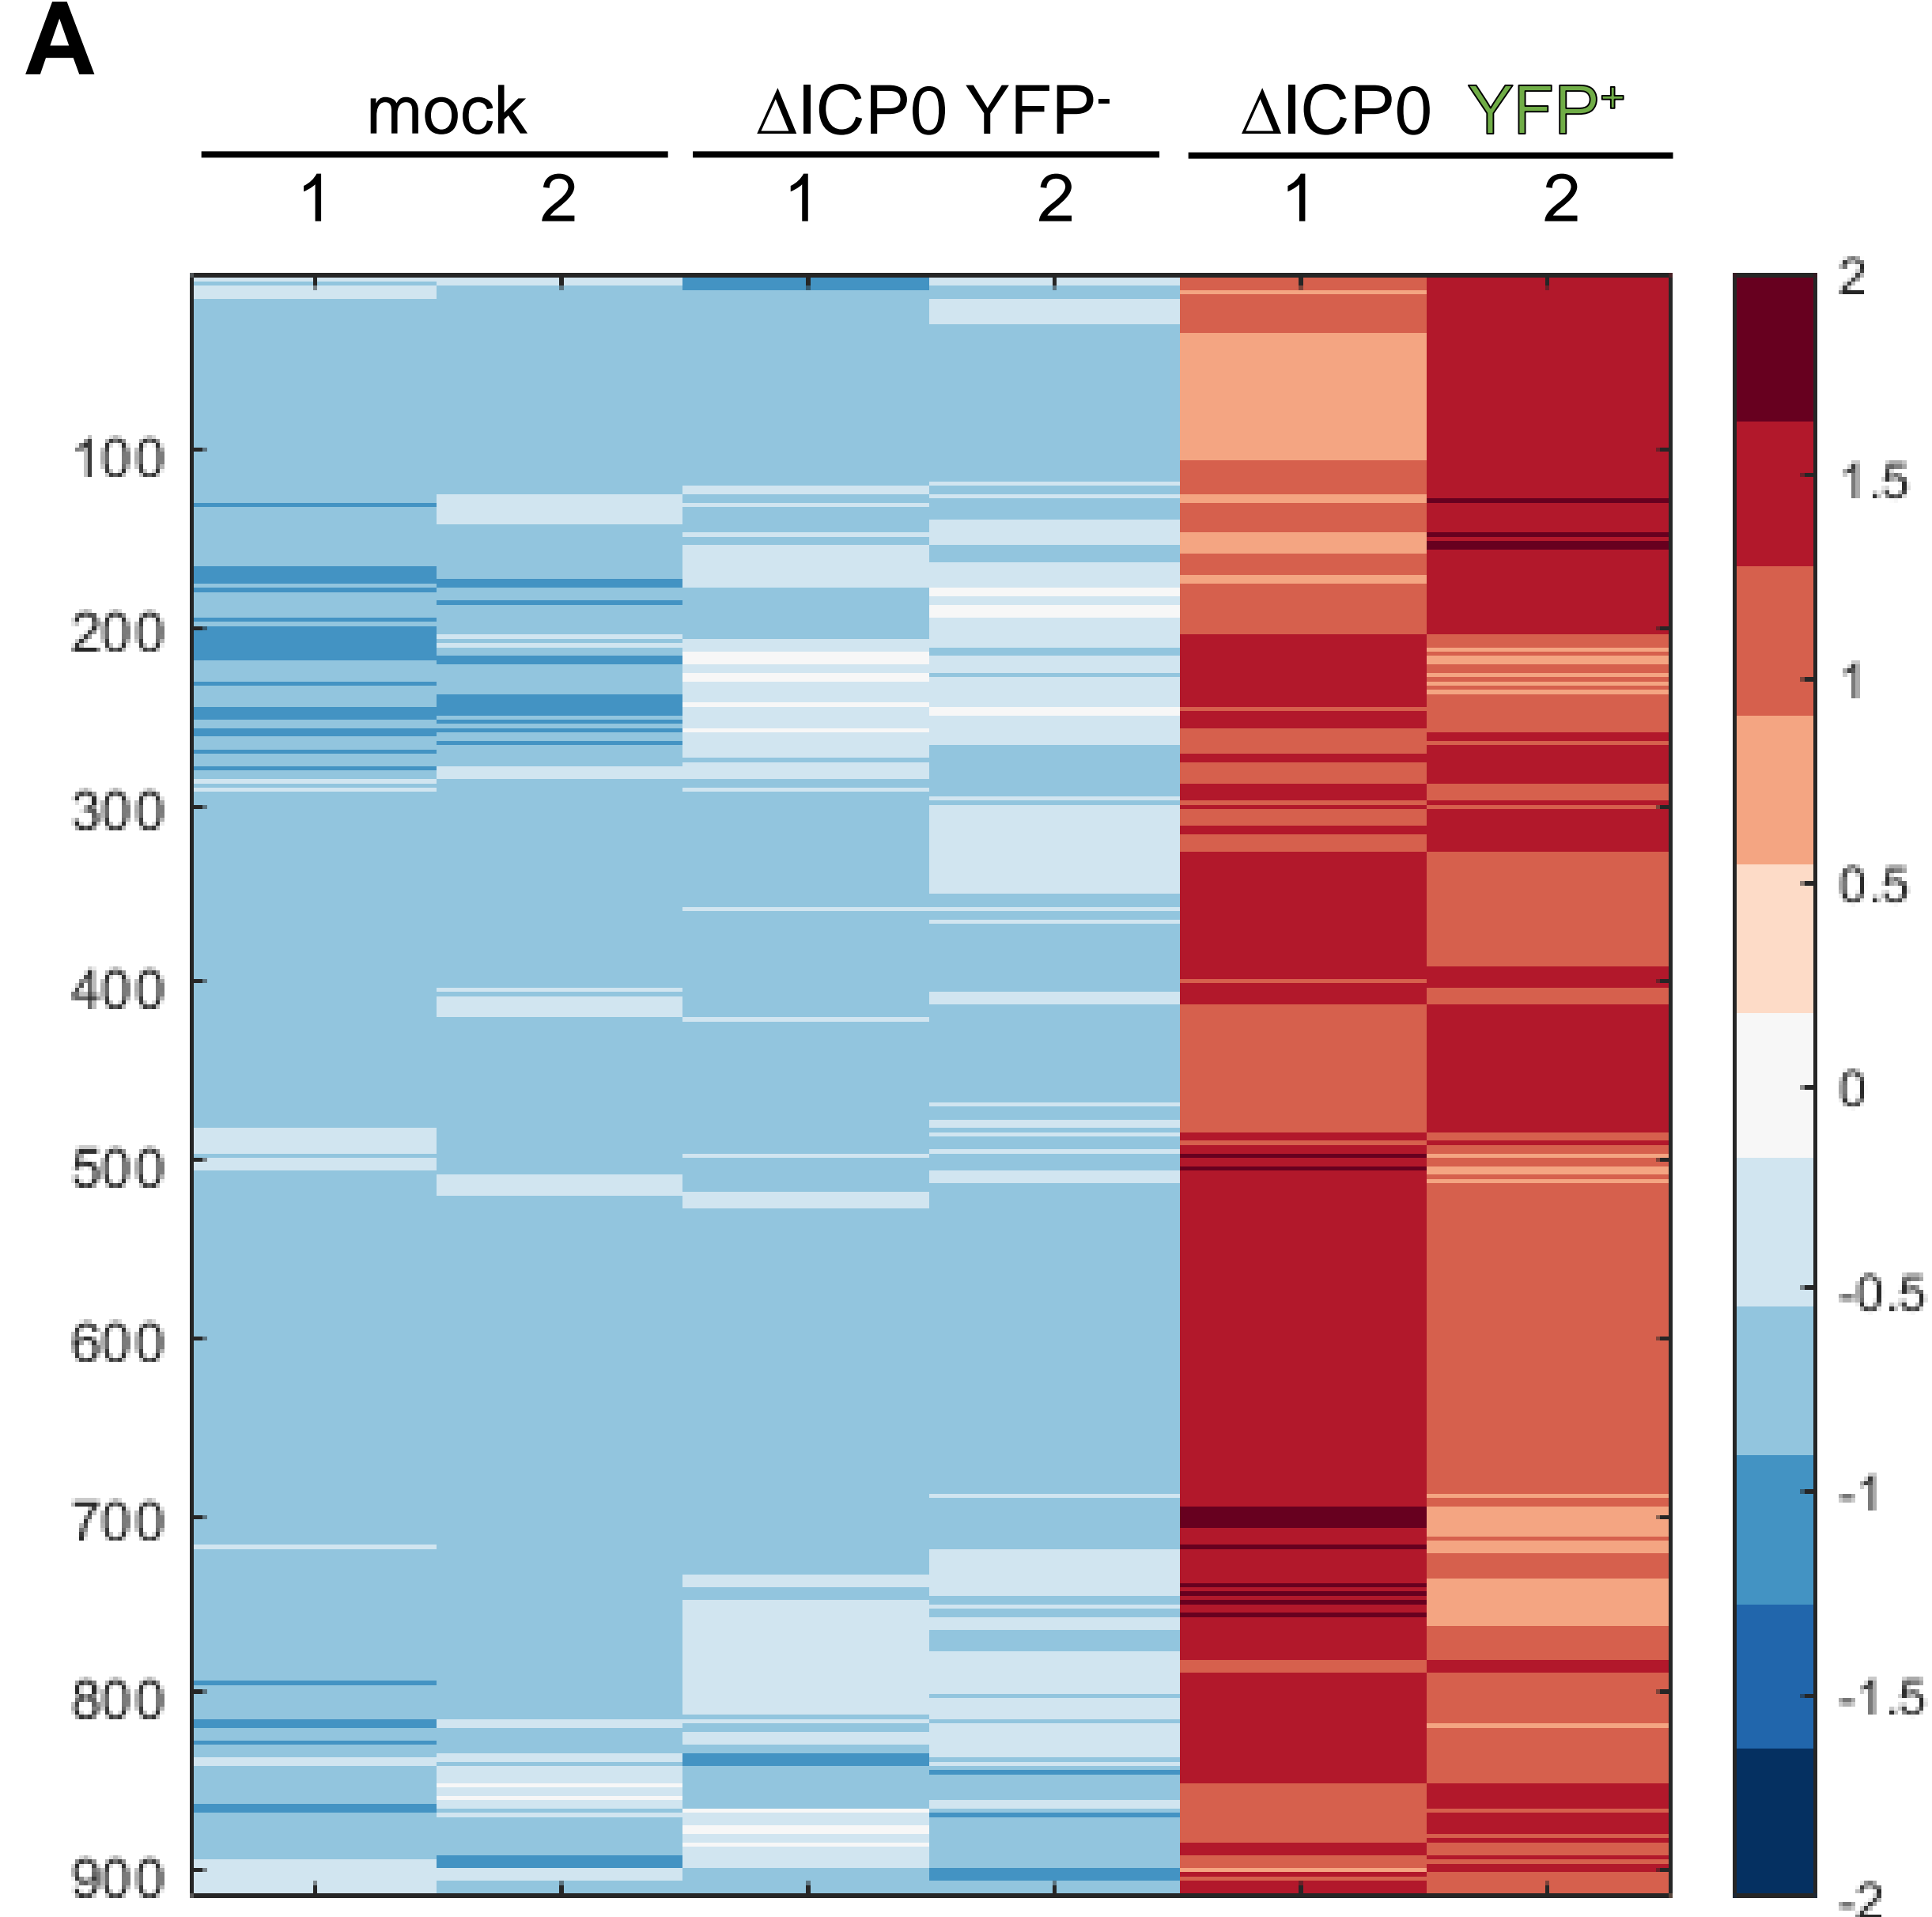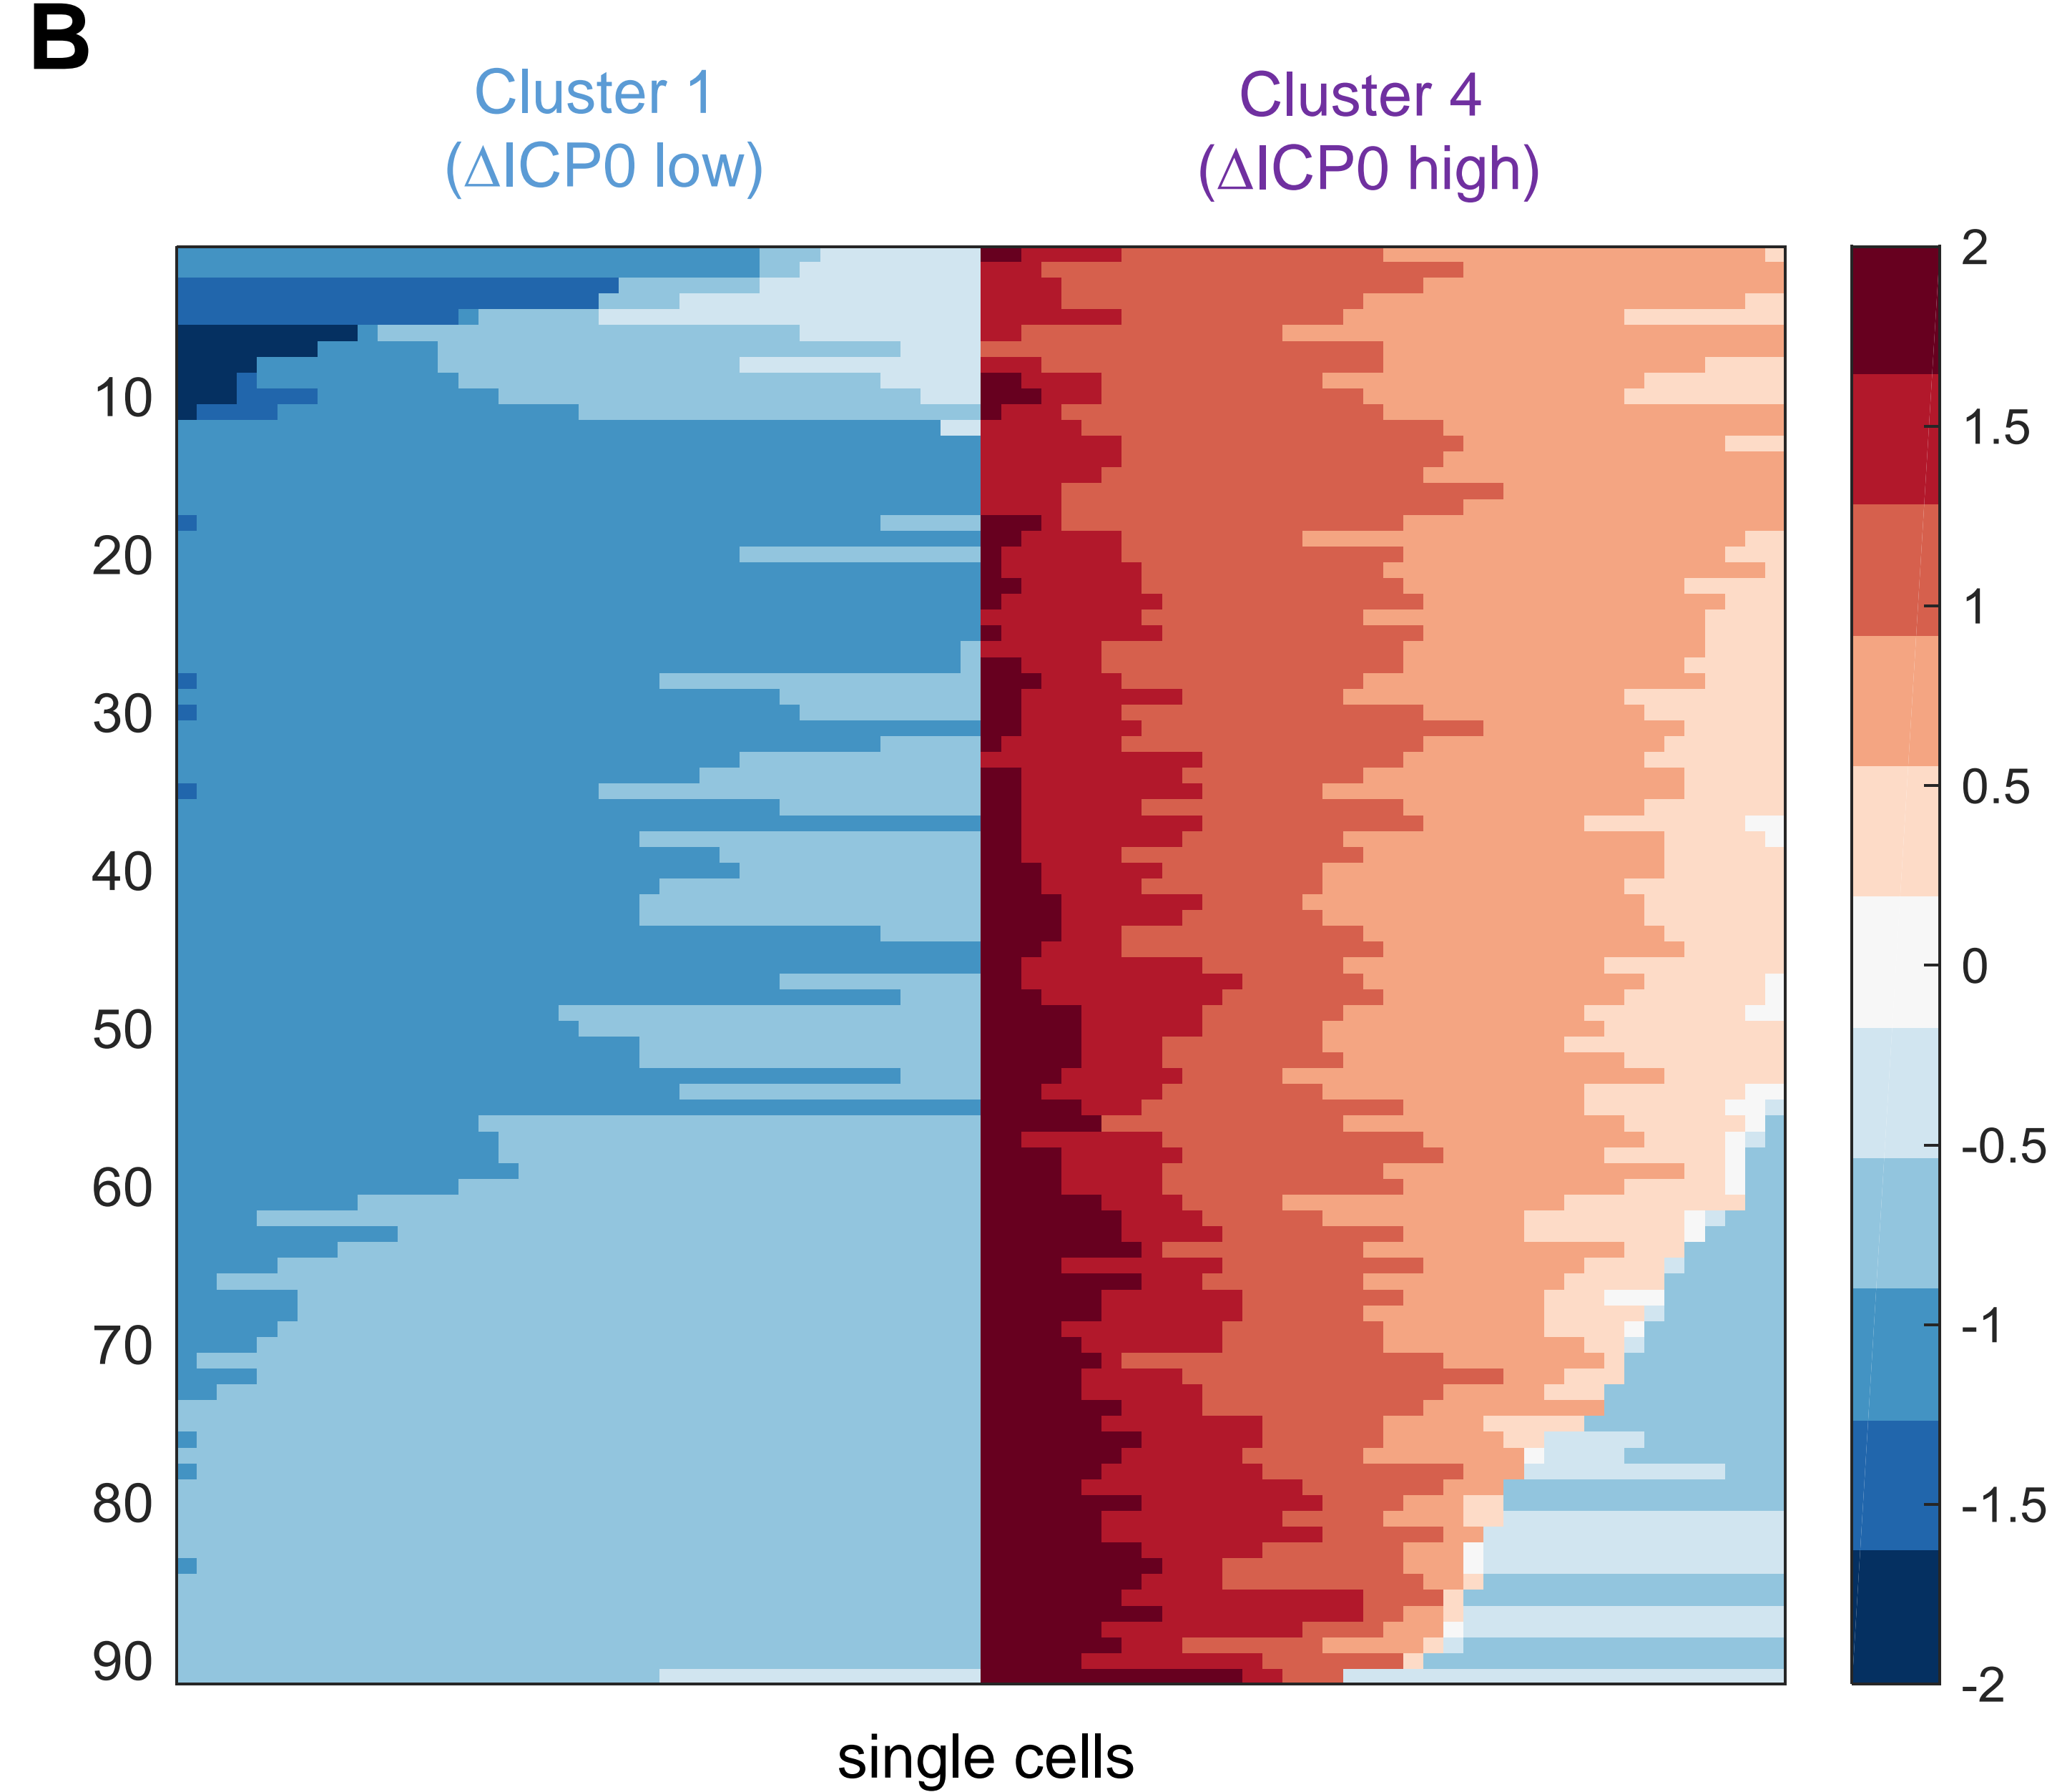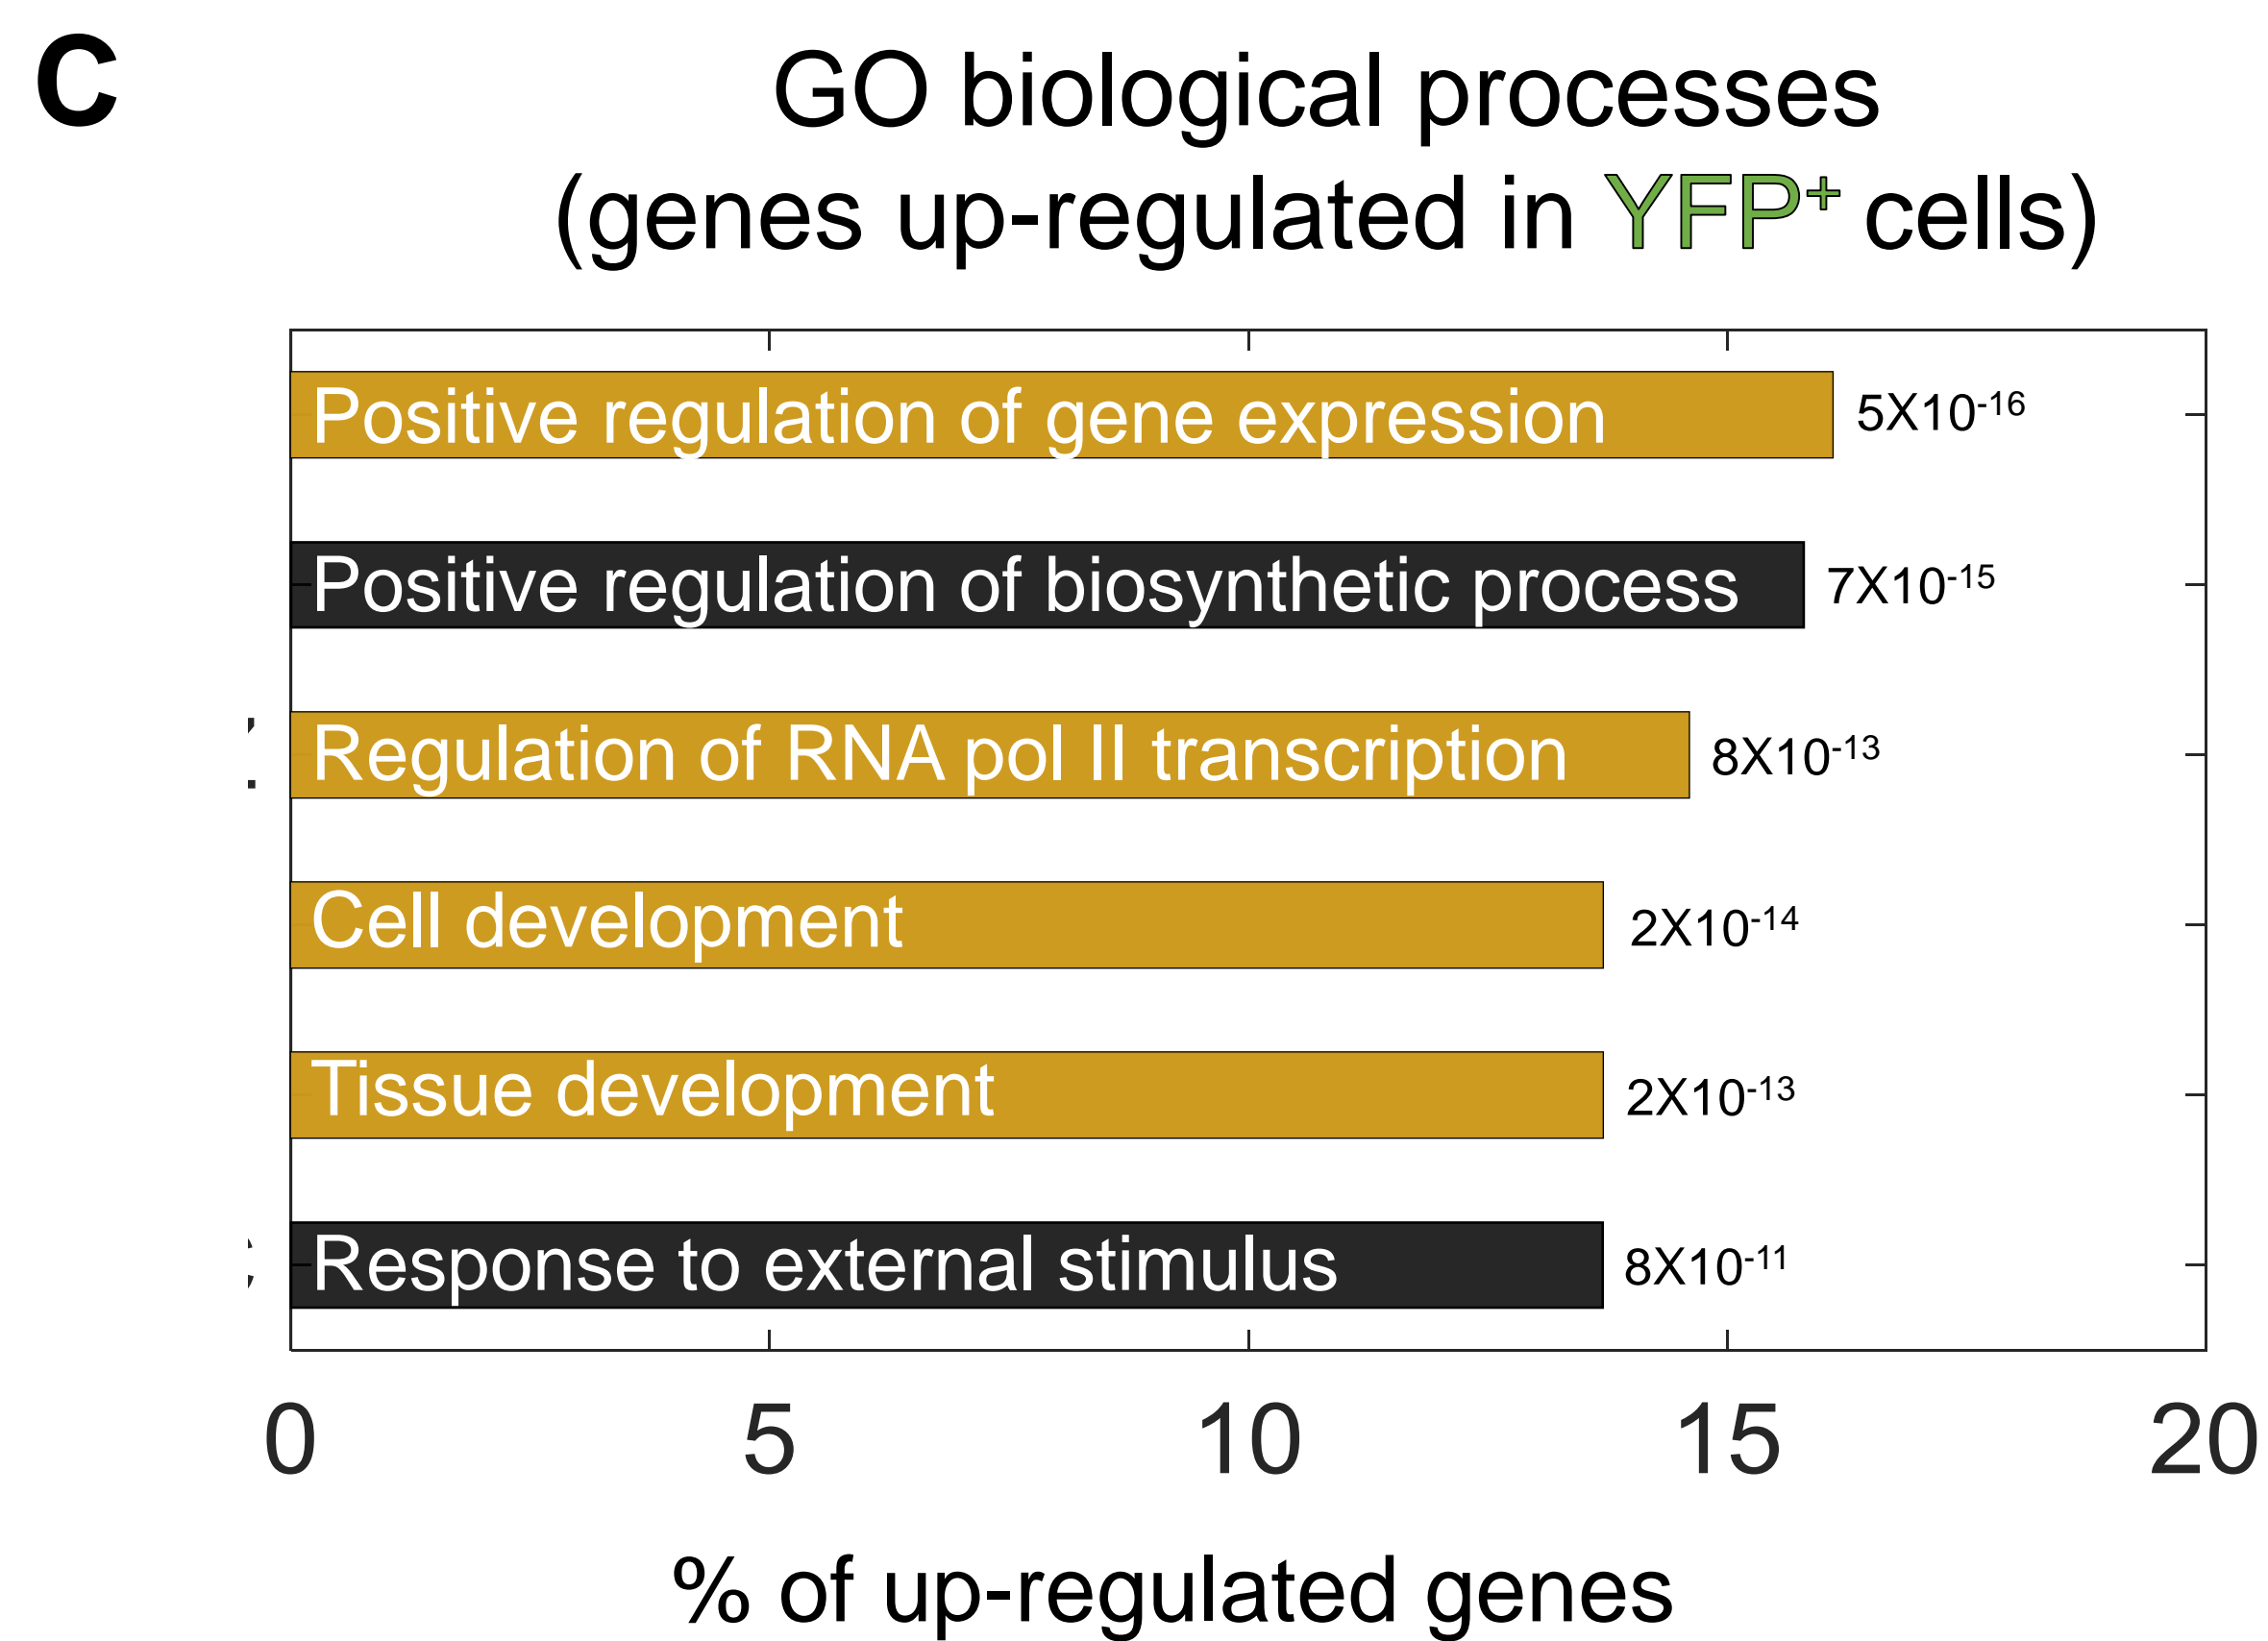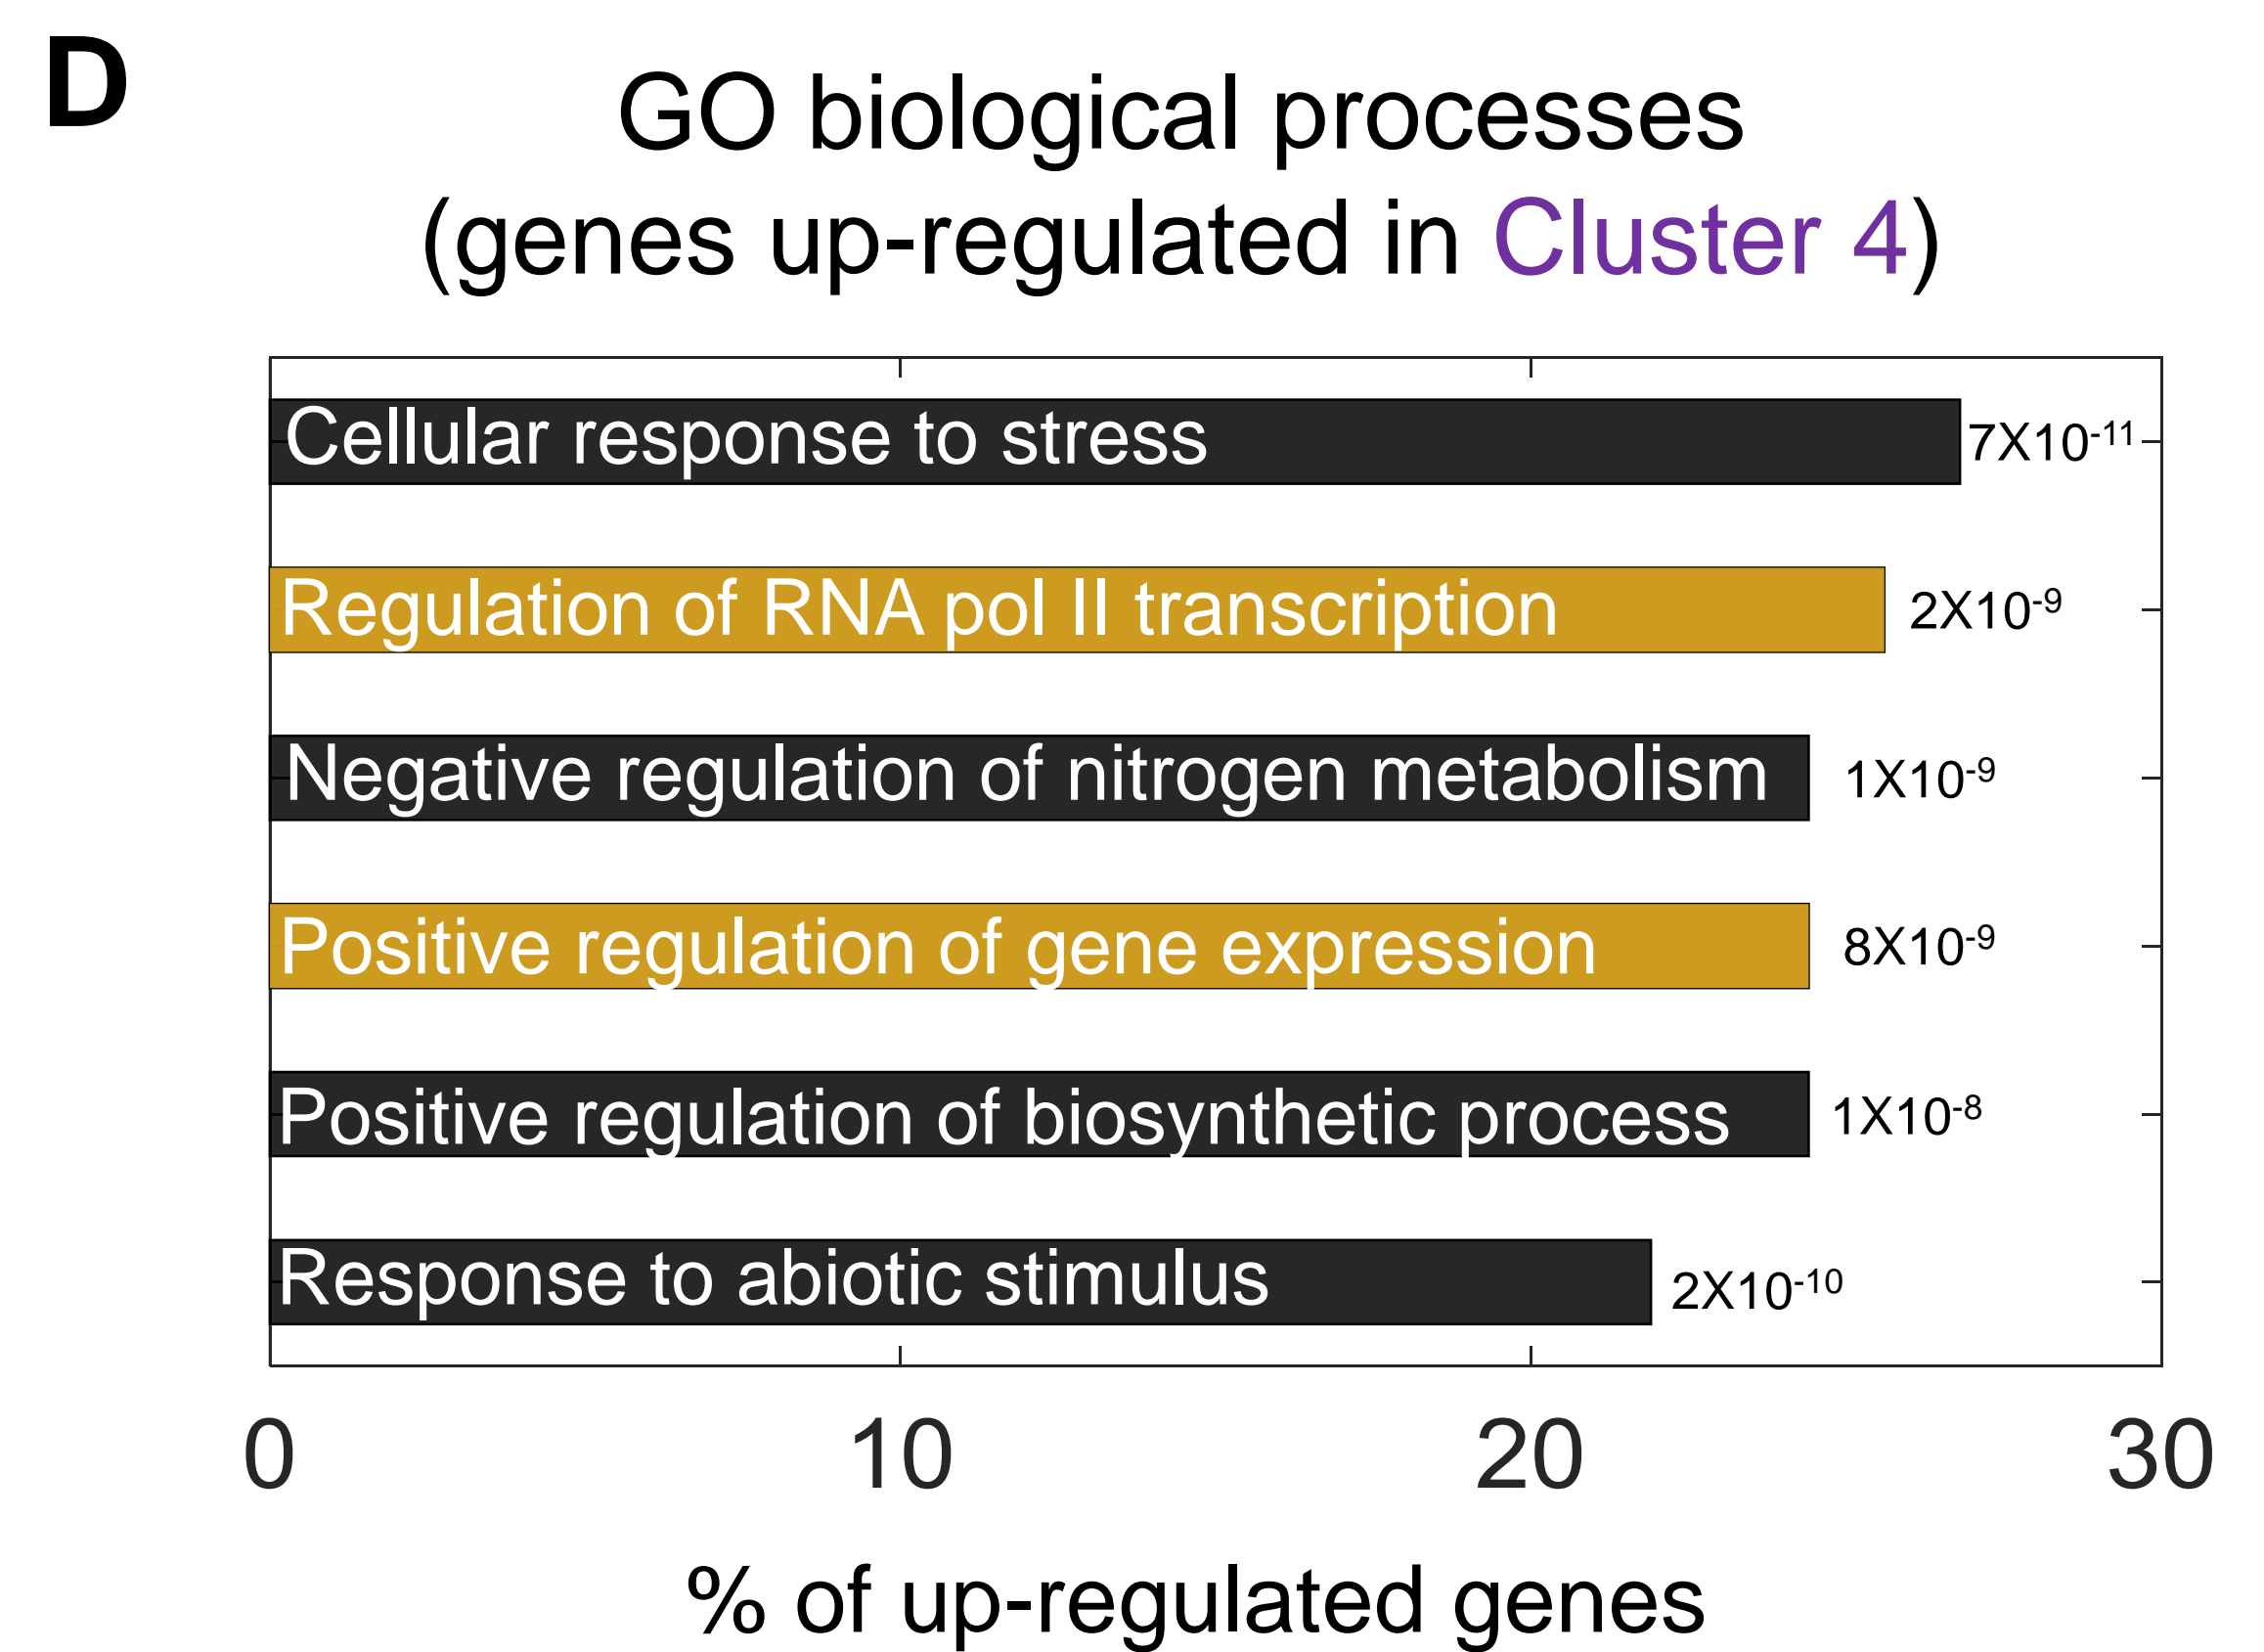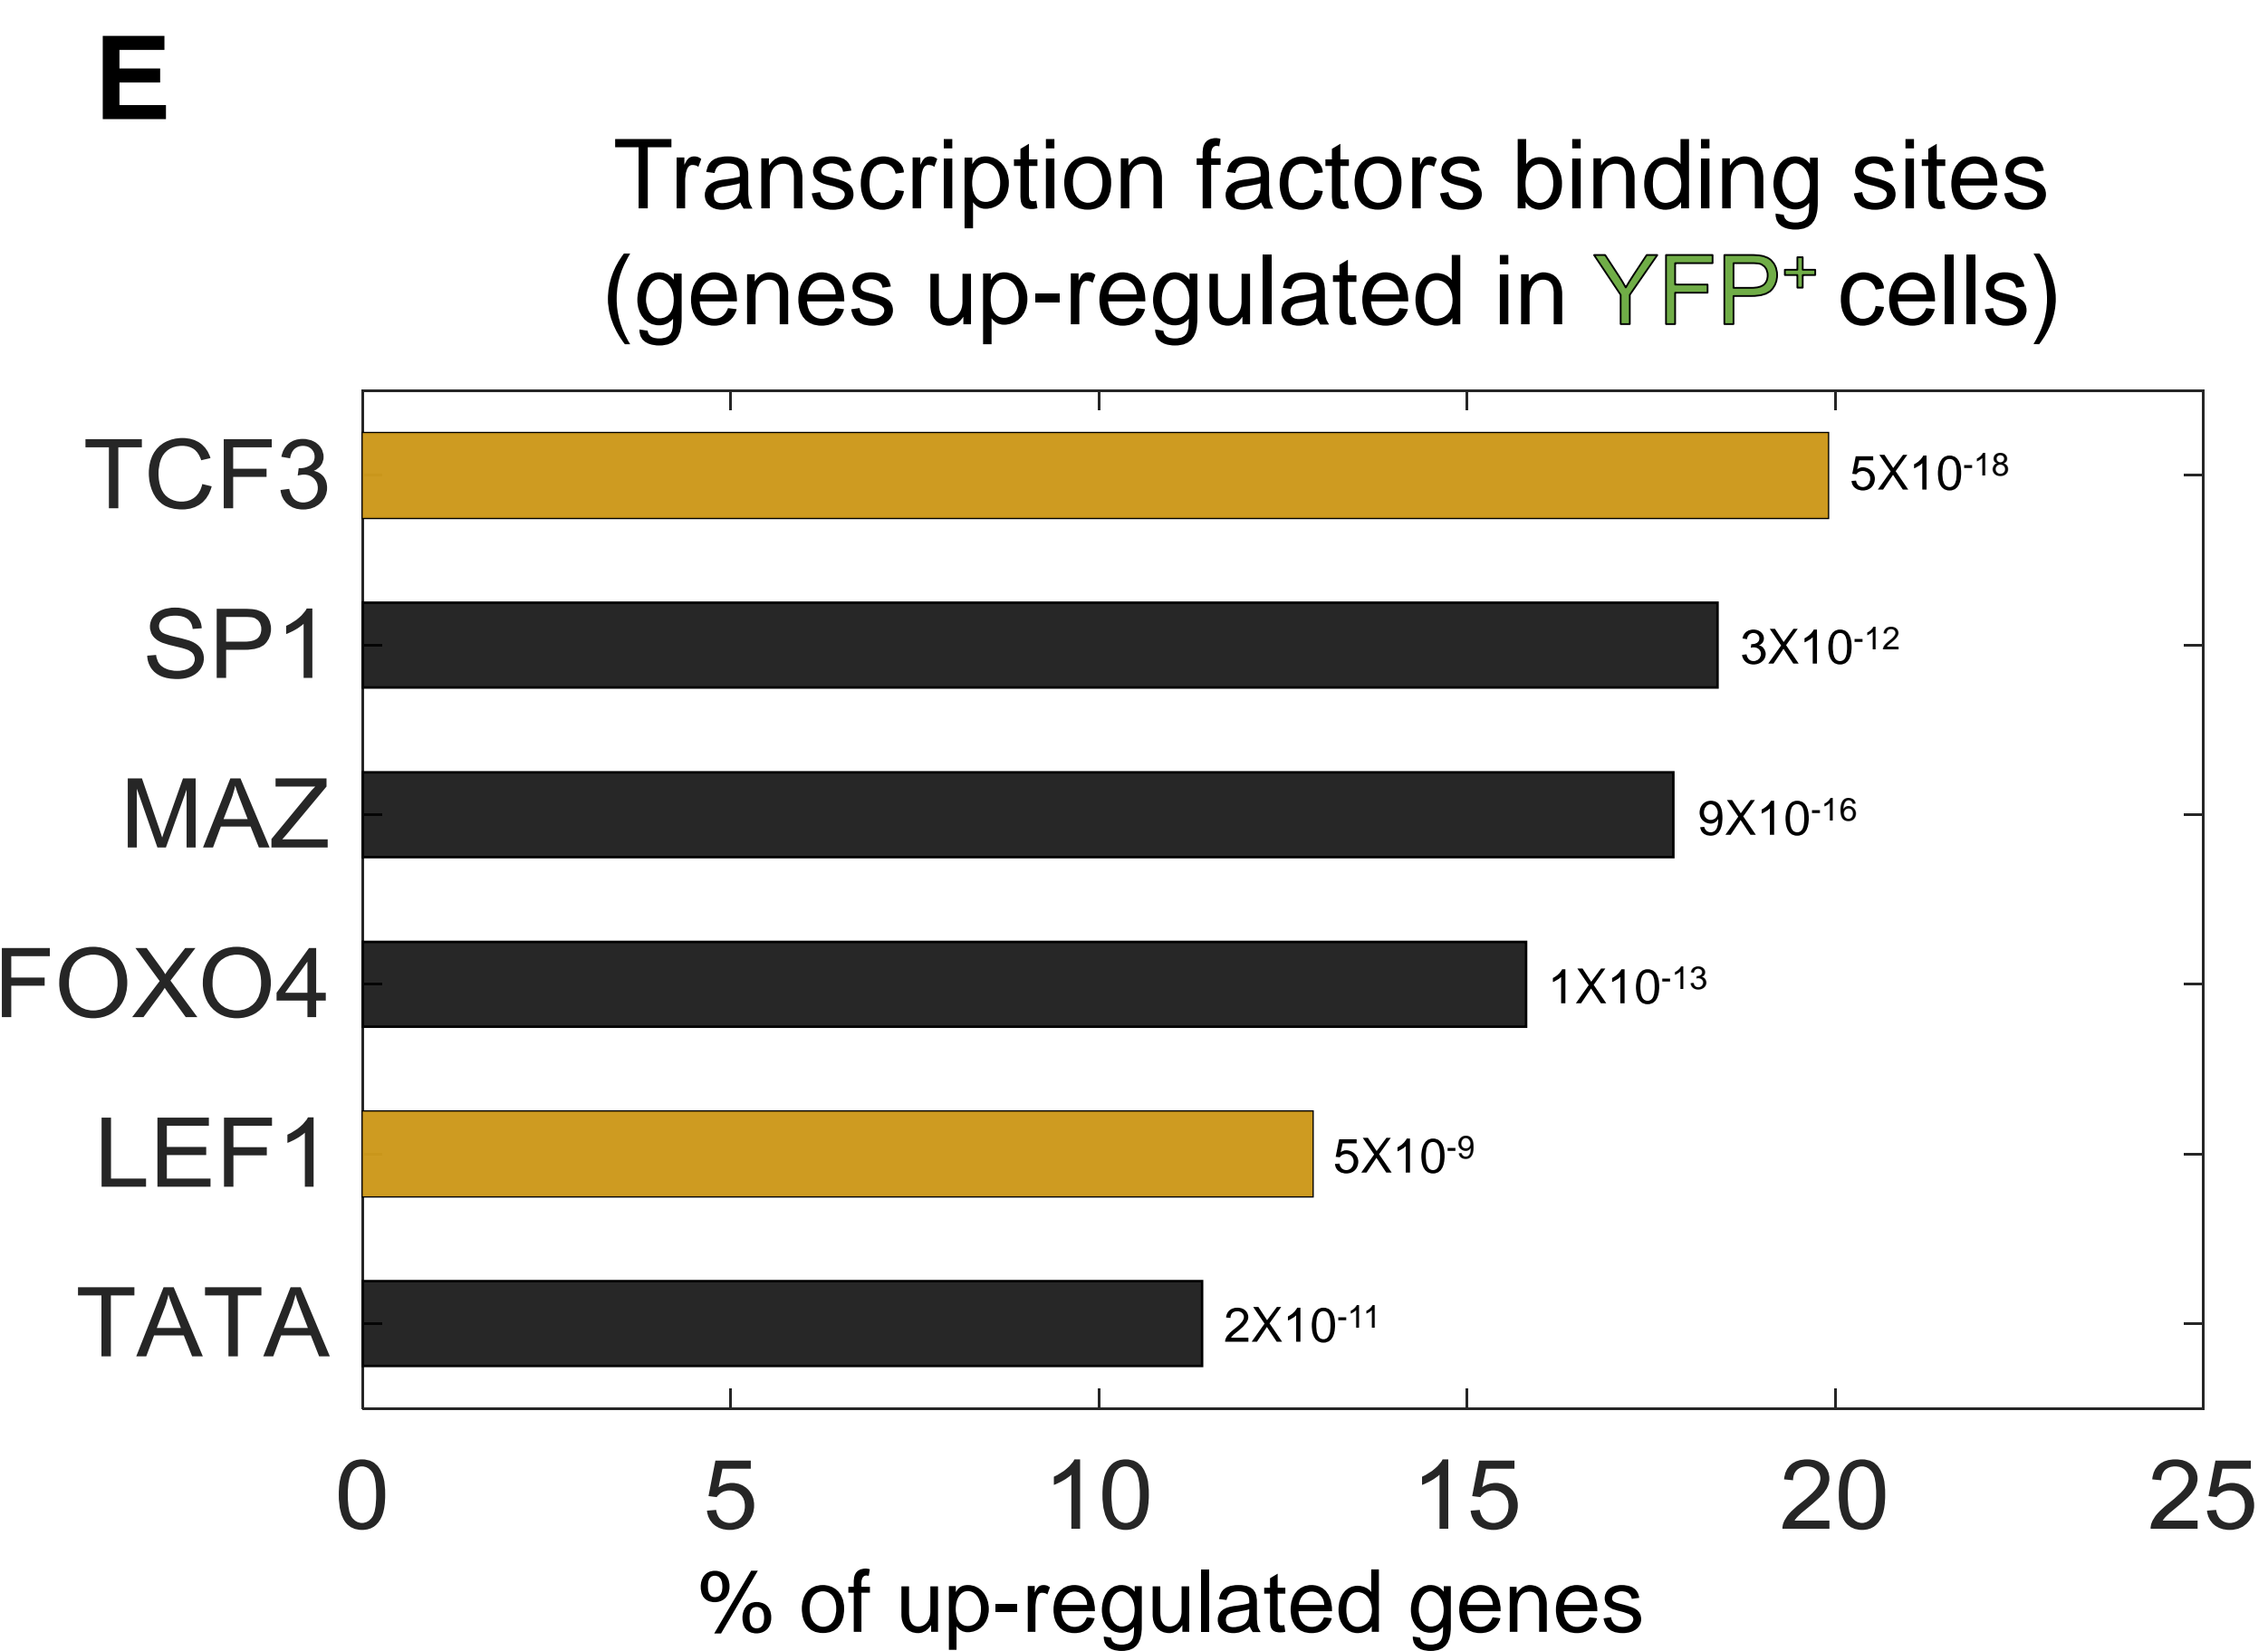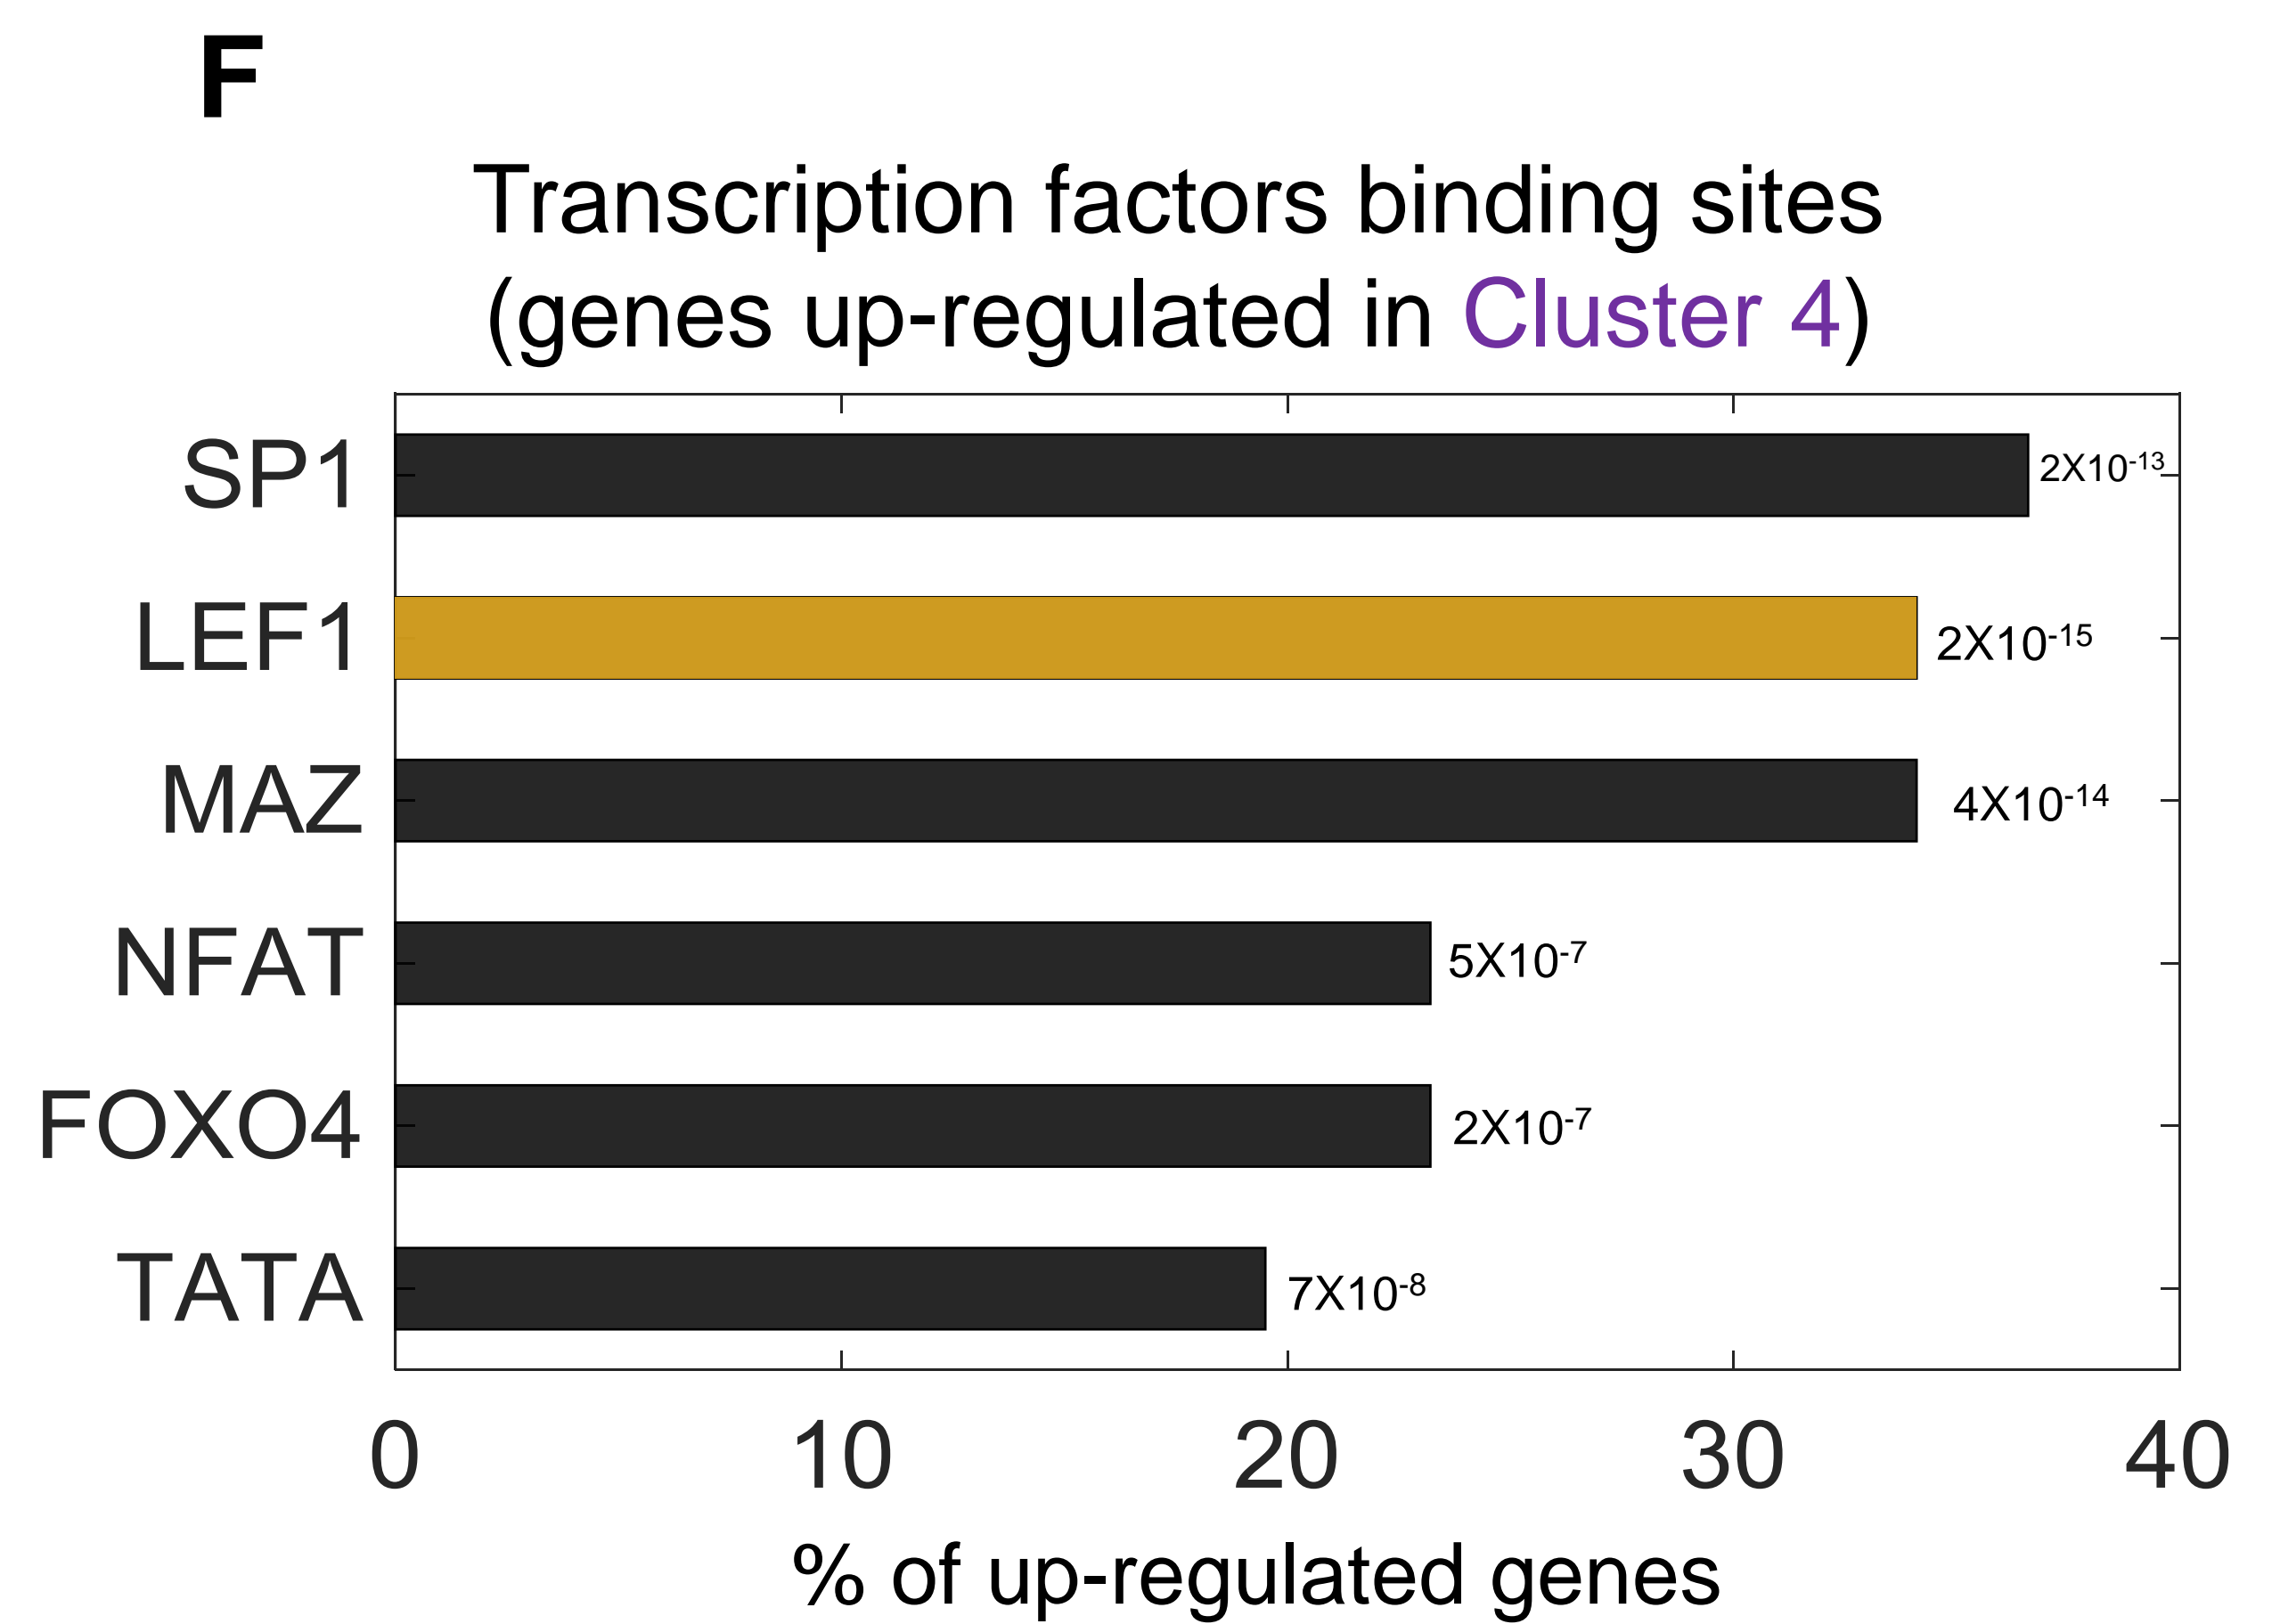

Supplement: supp [file elife_poa_e46339_Figure_4_figure_supplement_1.pdf › elife_poa_e46339_Figure_4_figure_supplement_1.pdf]

**A** $\beta$ -catenin

ICP4

Merged

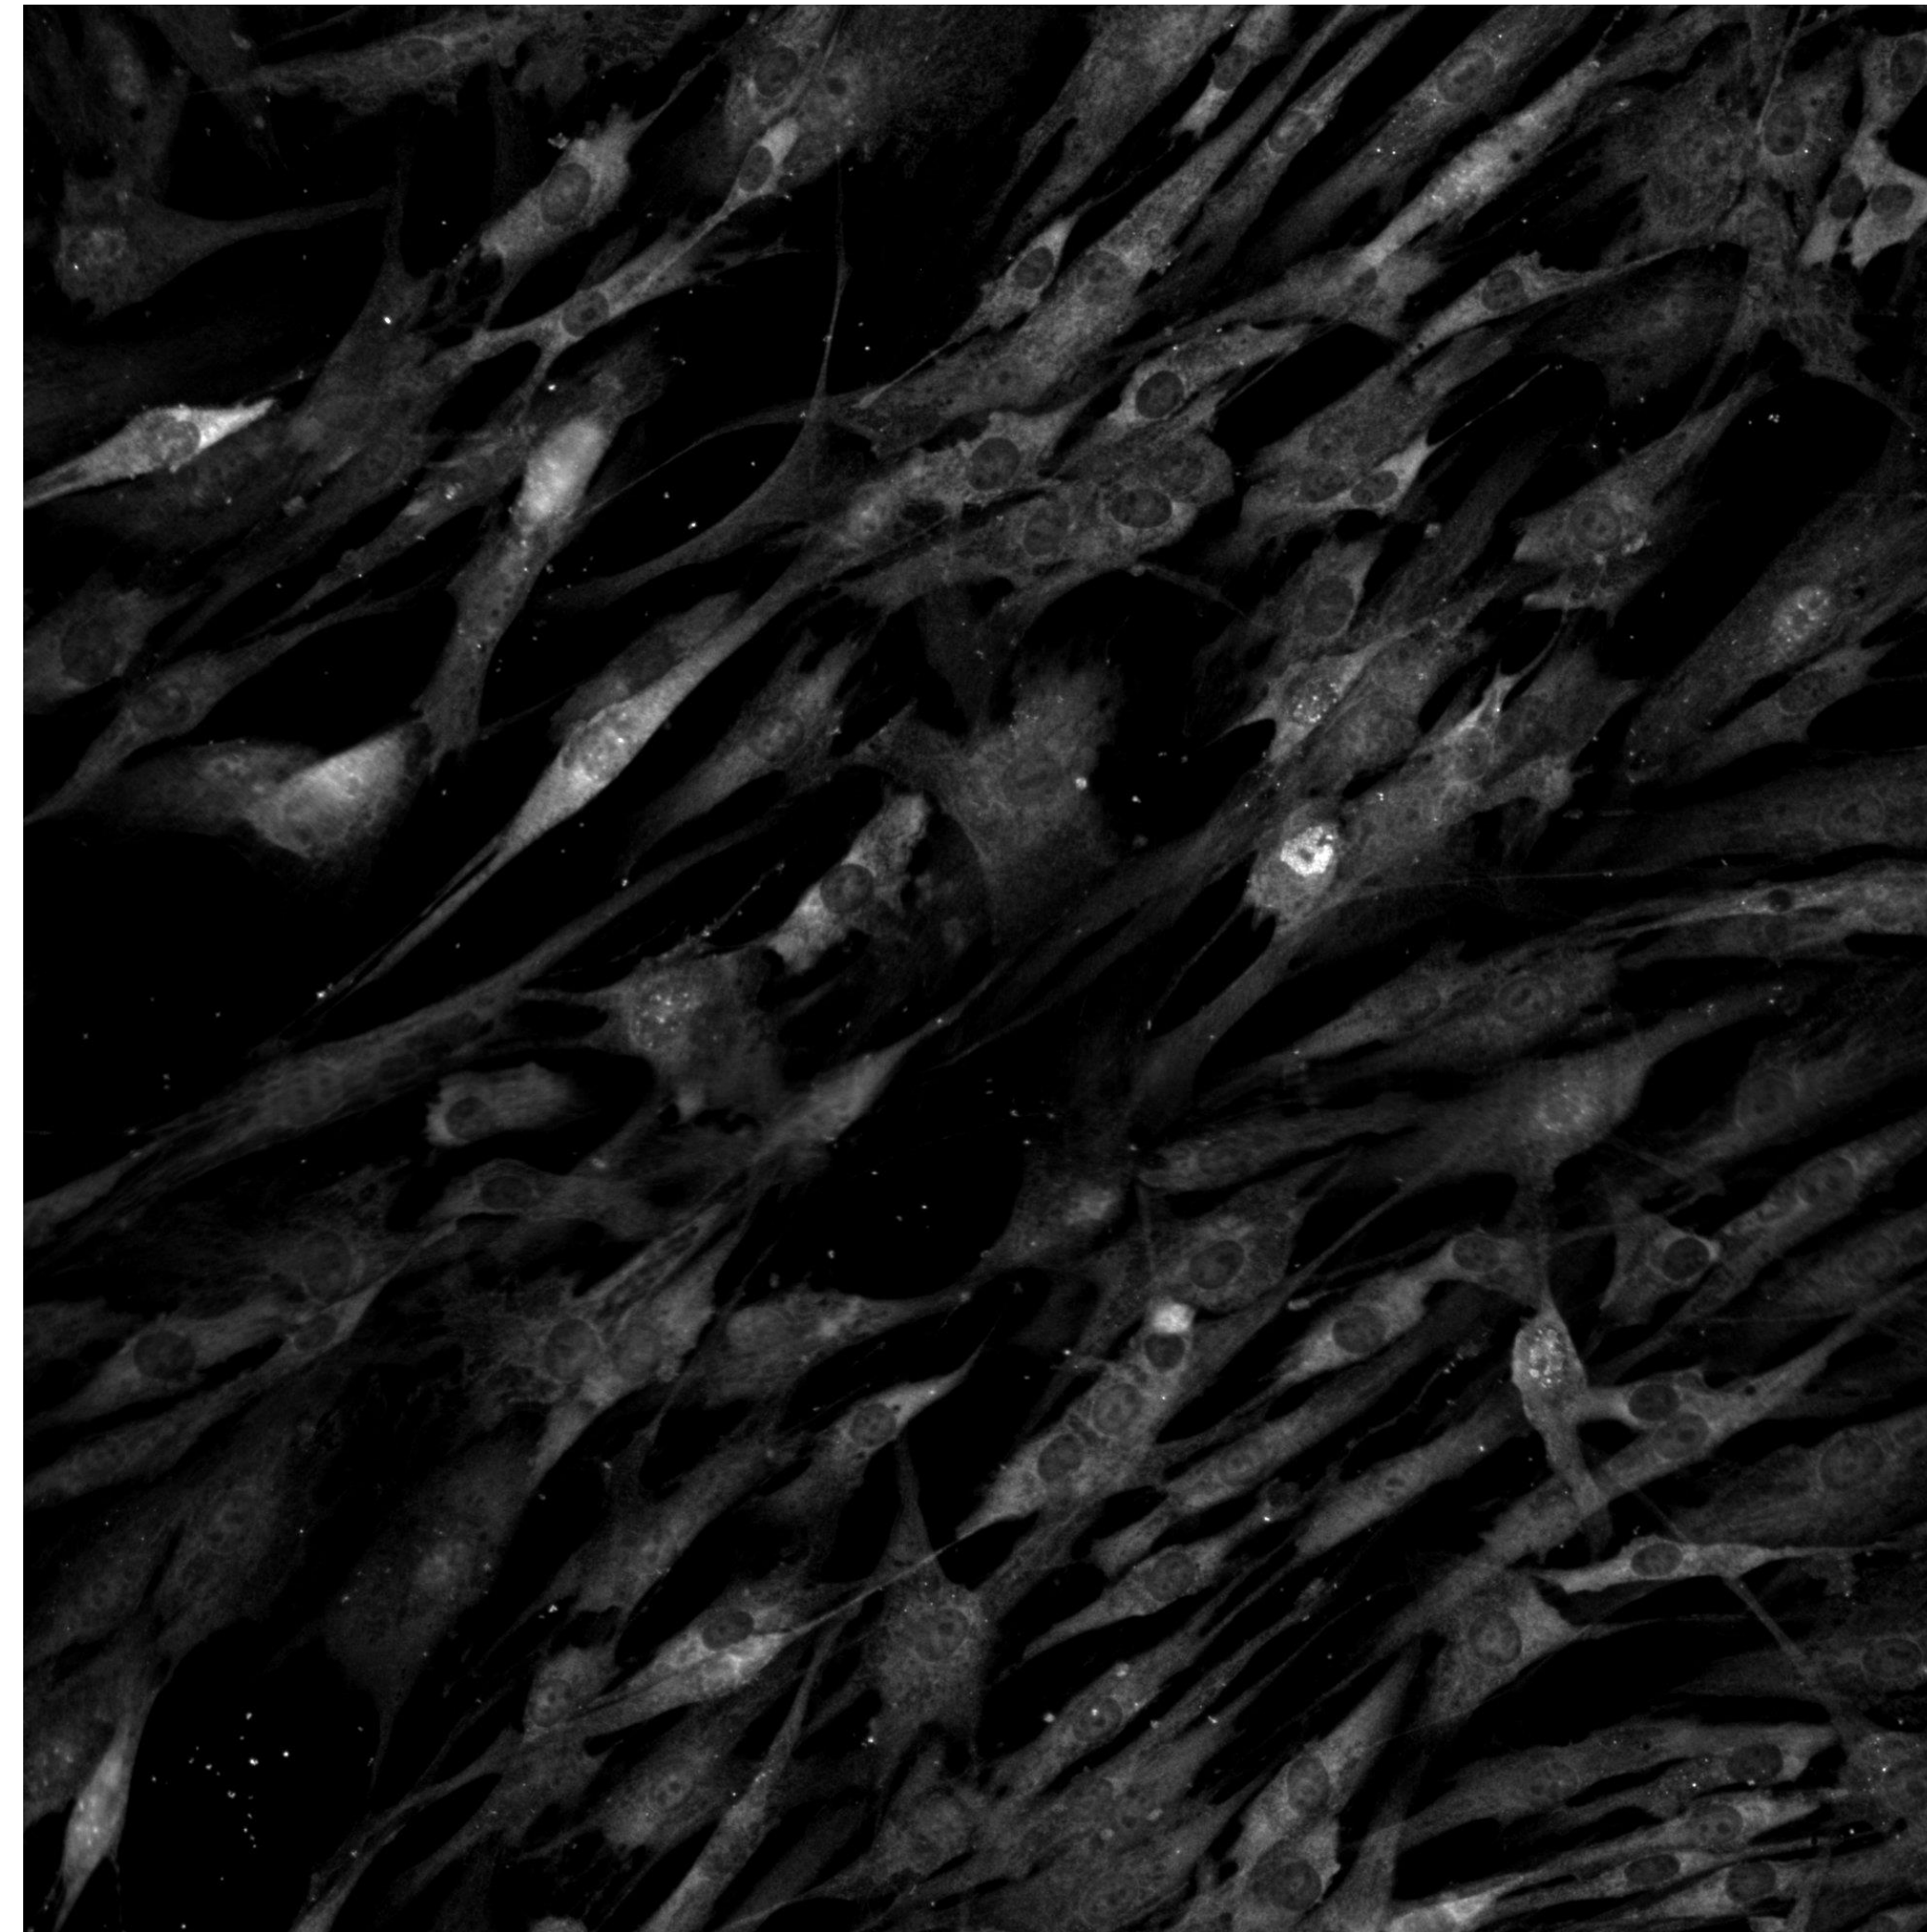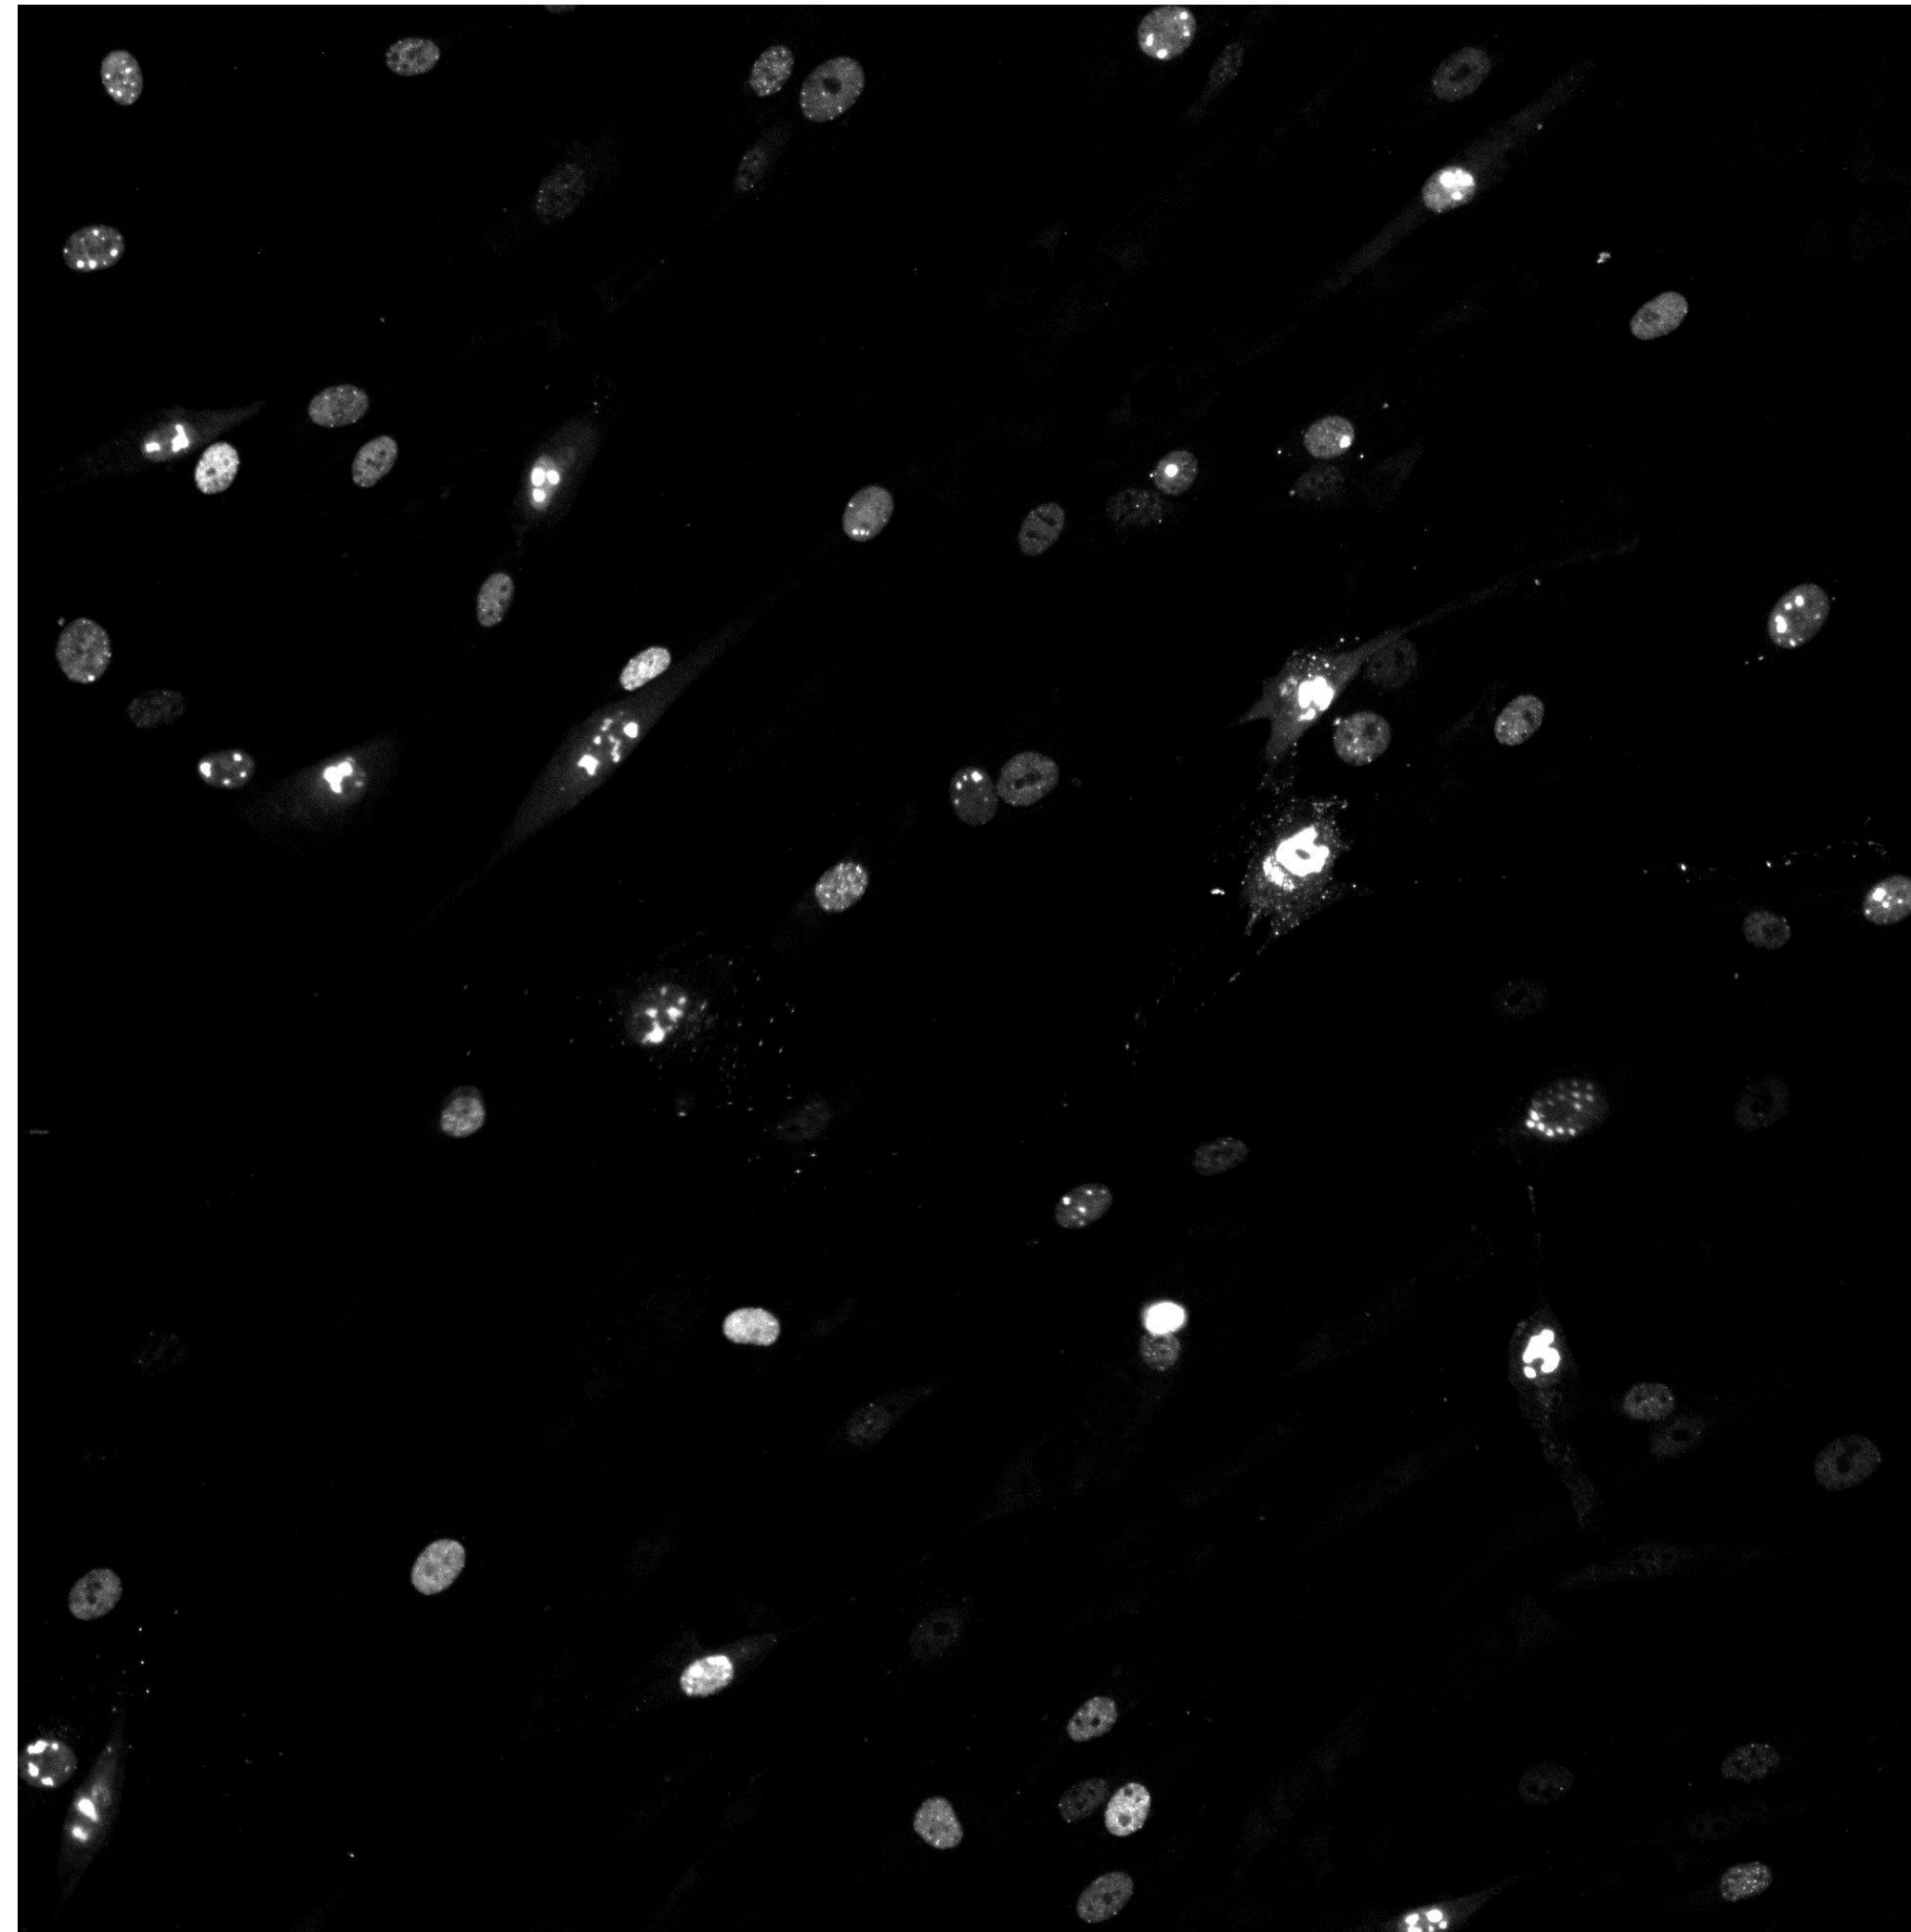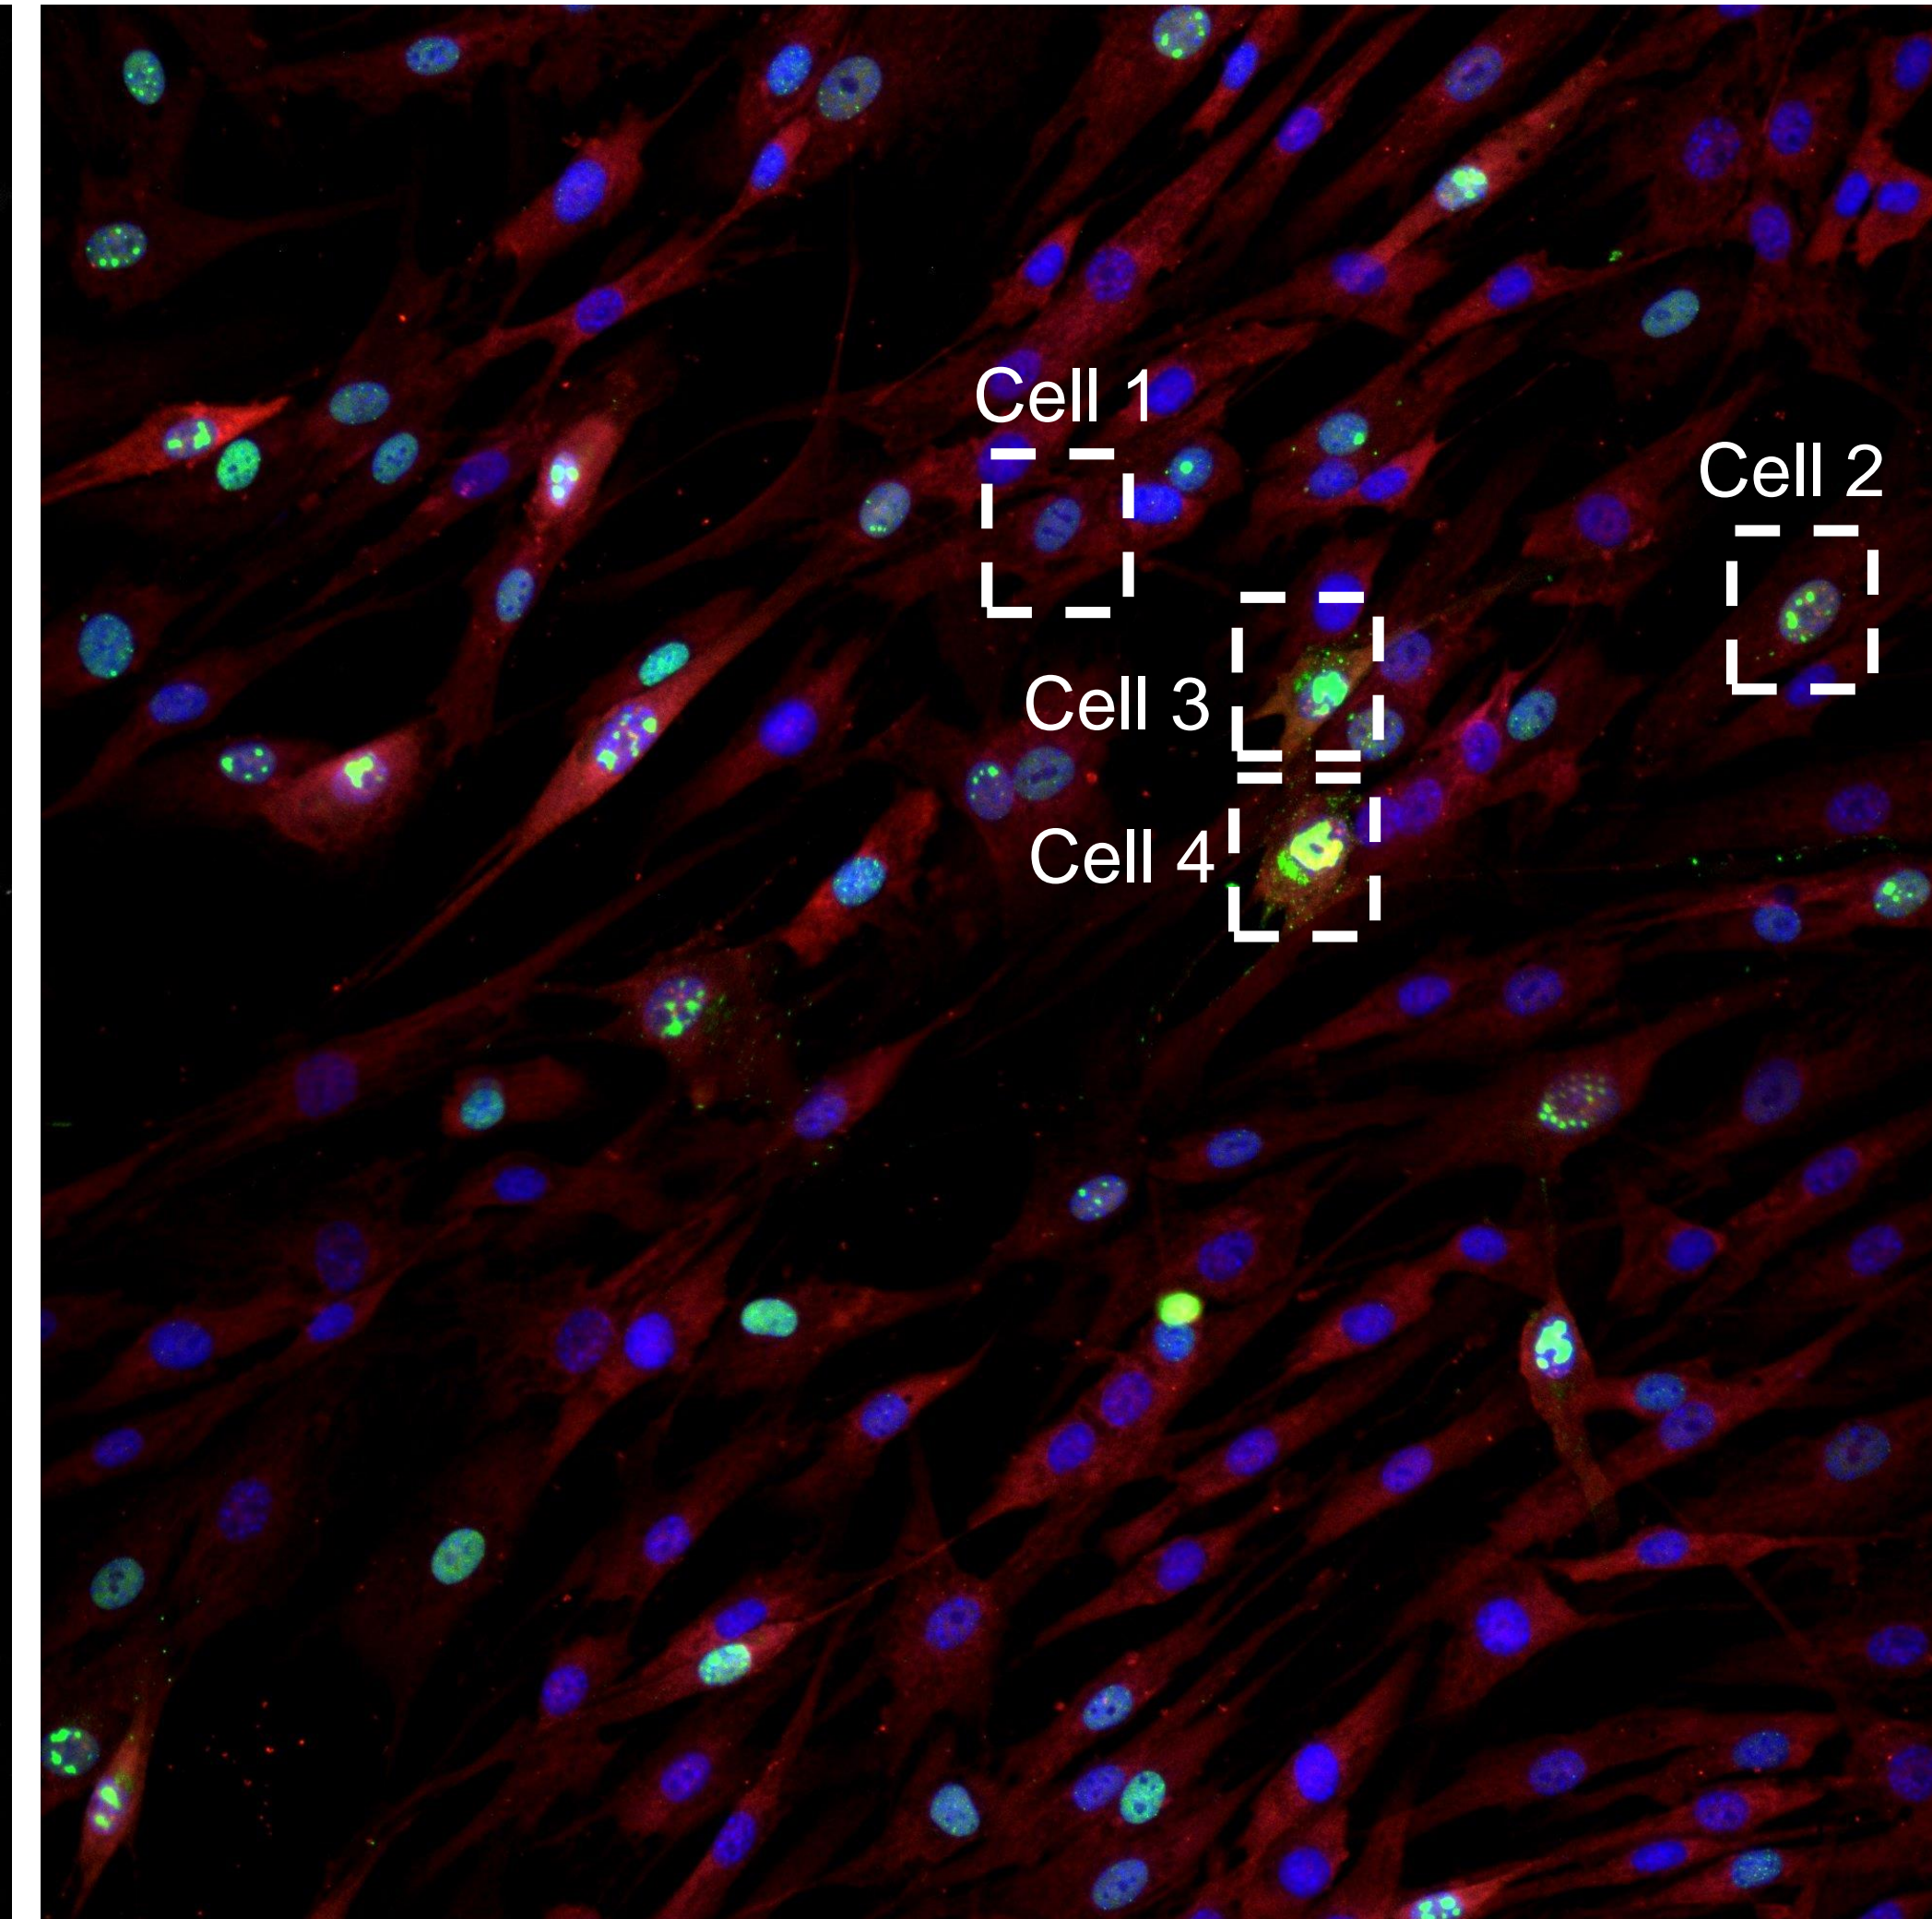**B** $\beta$ -catenin

ICP4

Merged

 $\beta$ -catenin

ICP4

Merged

Cell 1

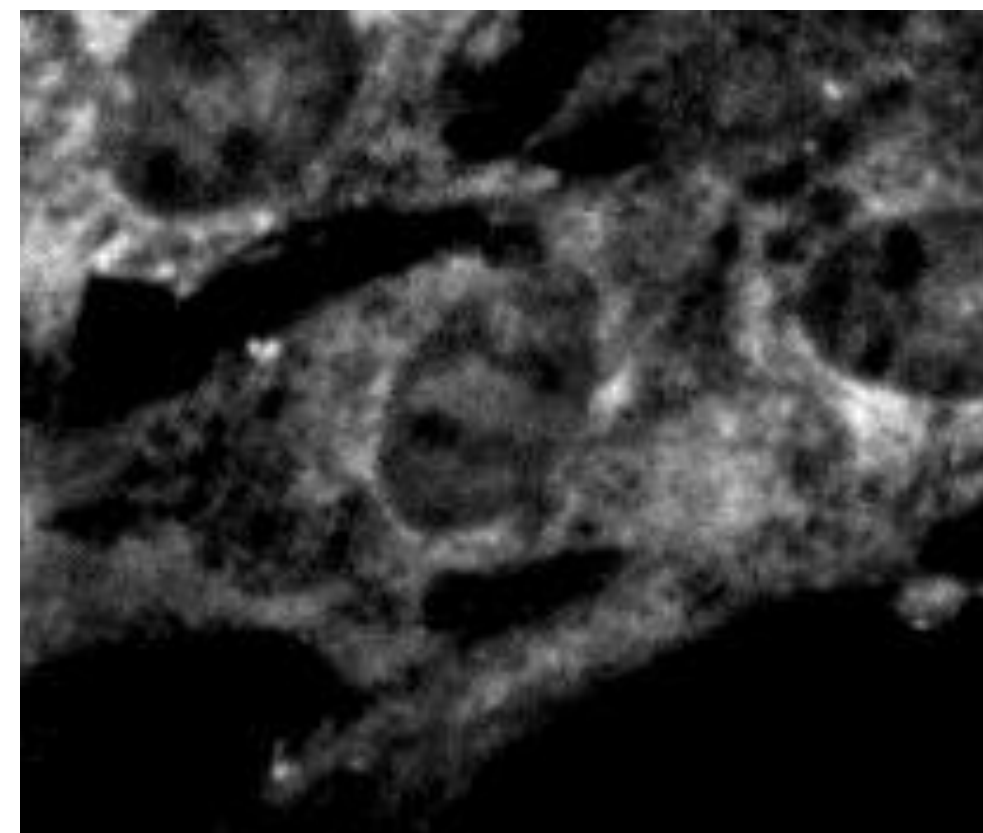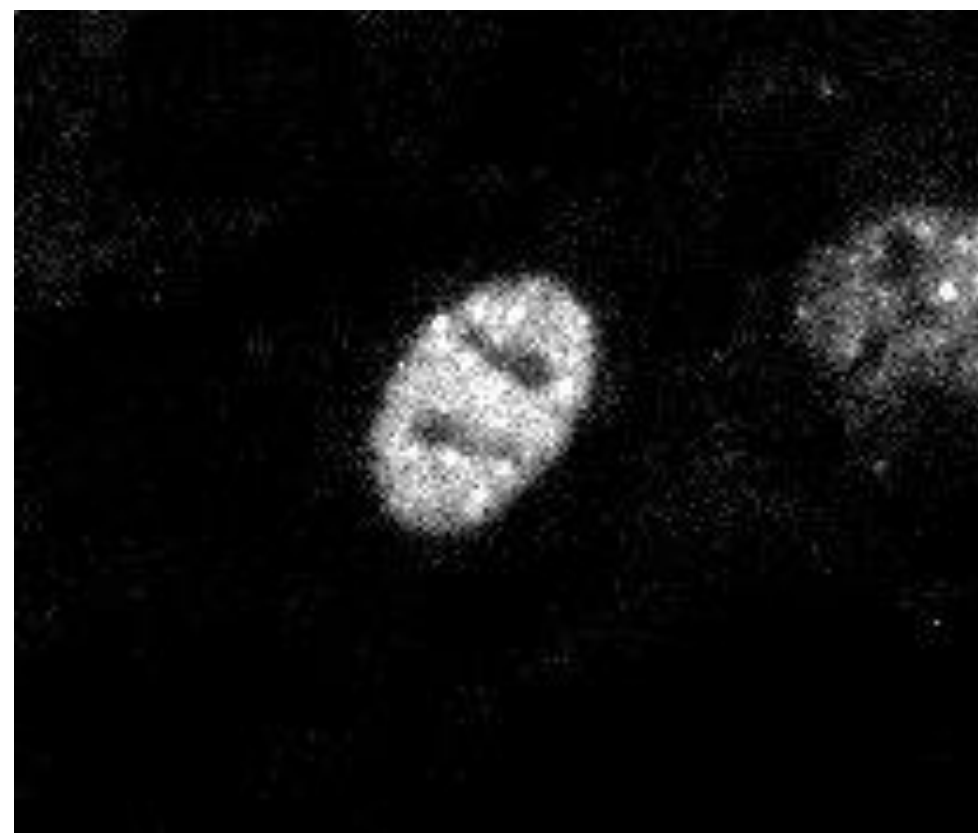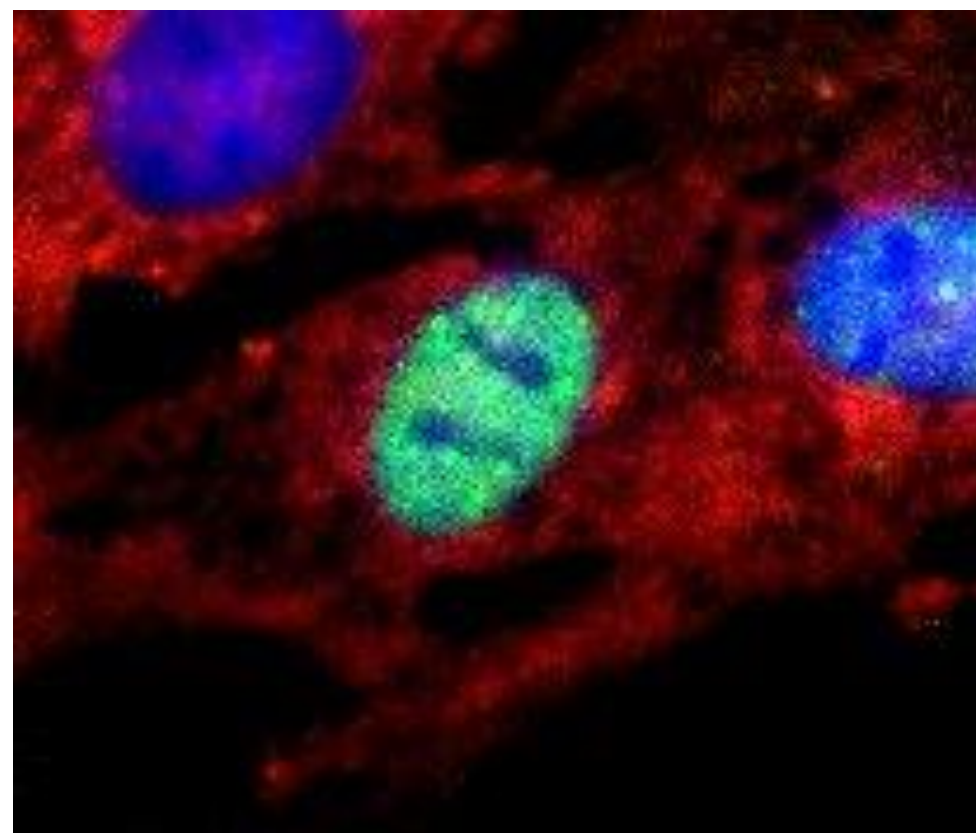

Cell 2

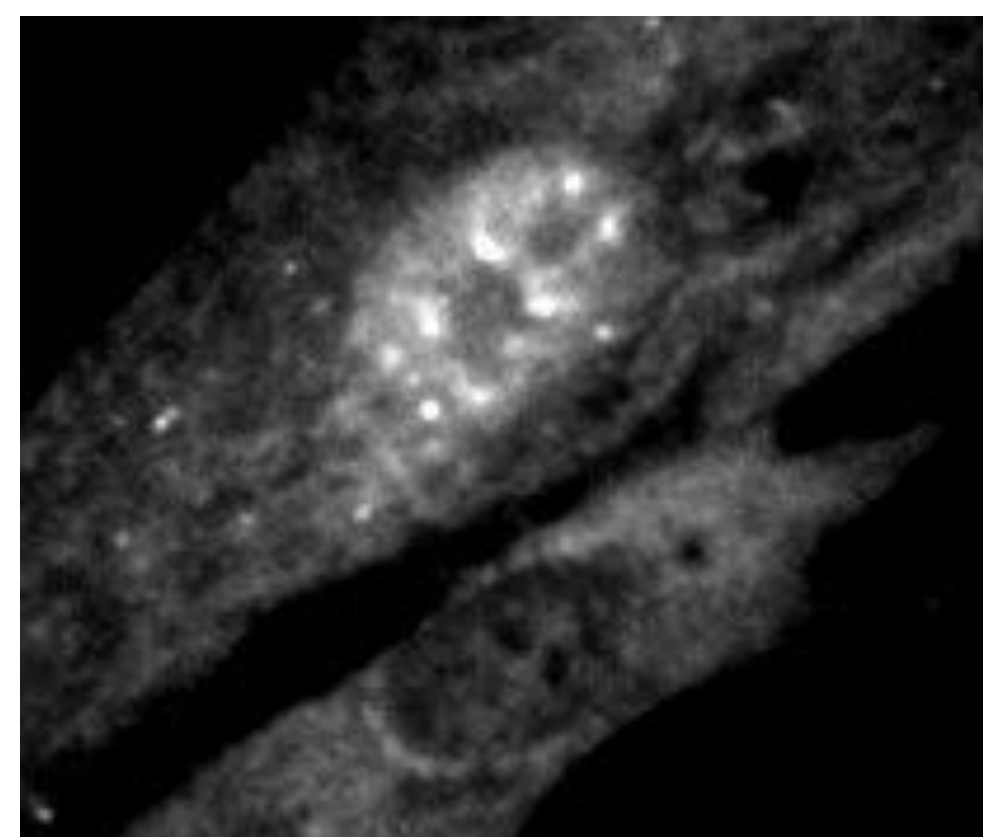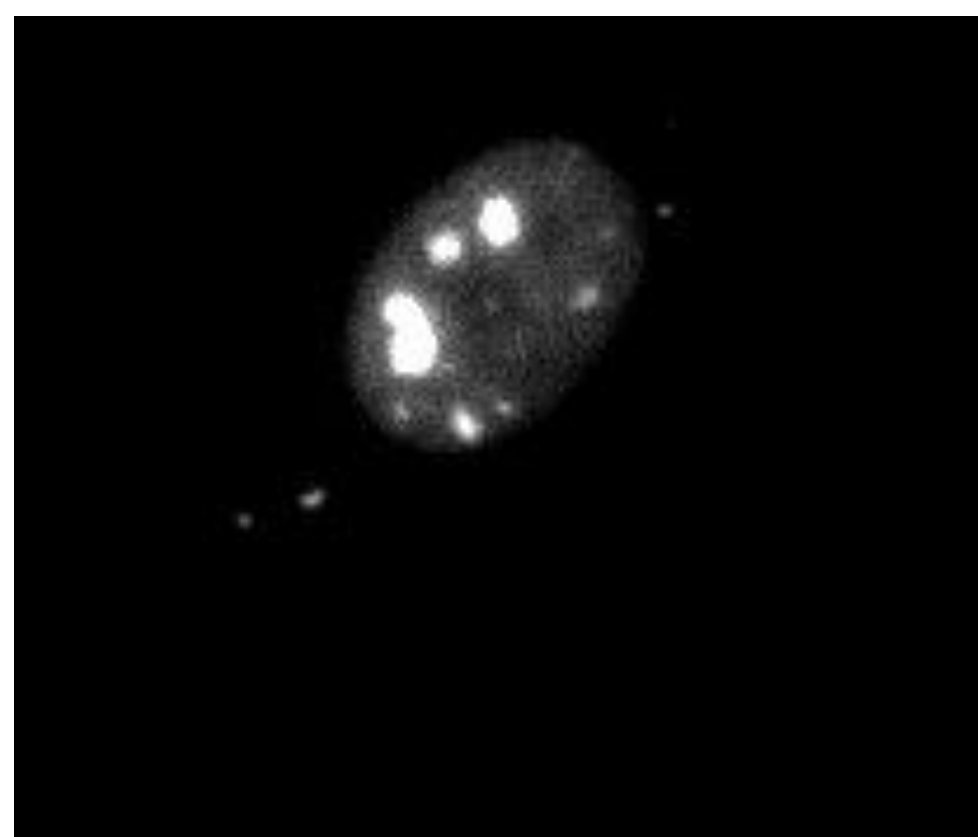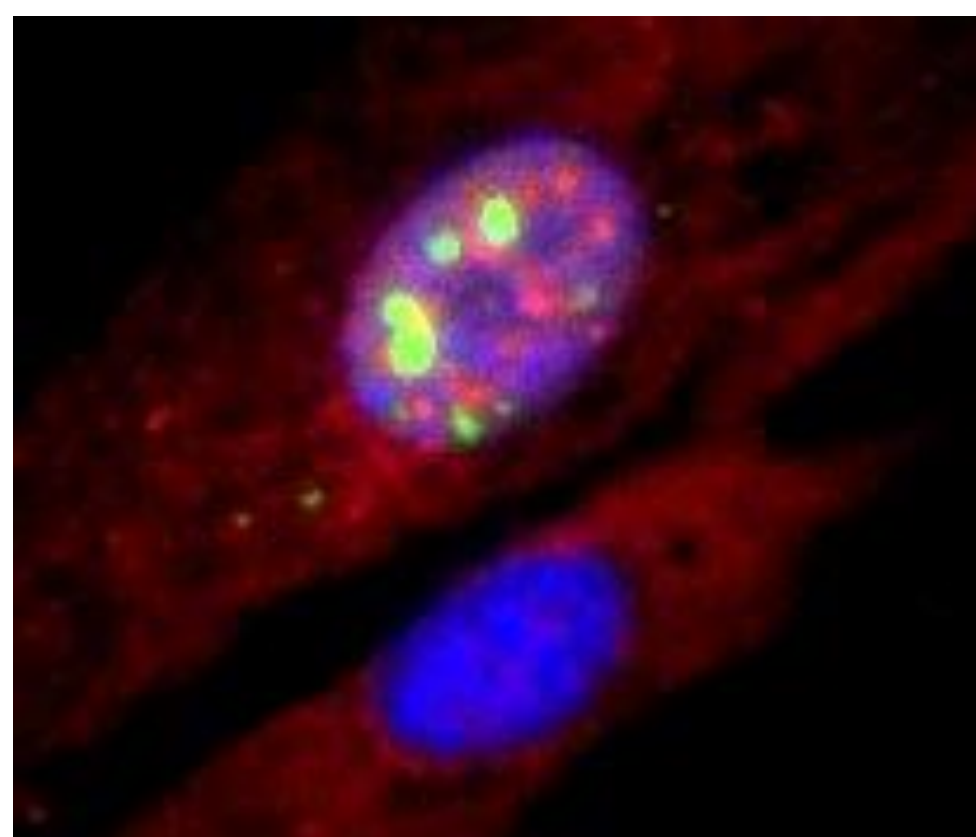

Cell 3

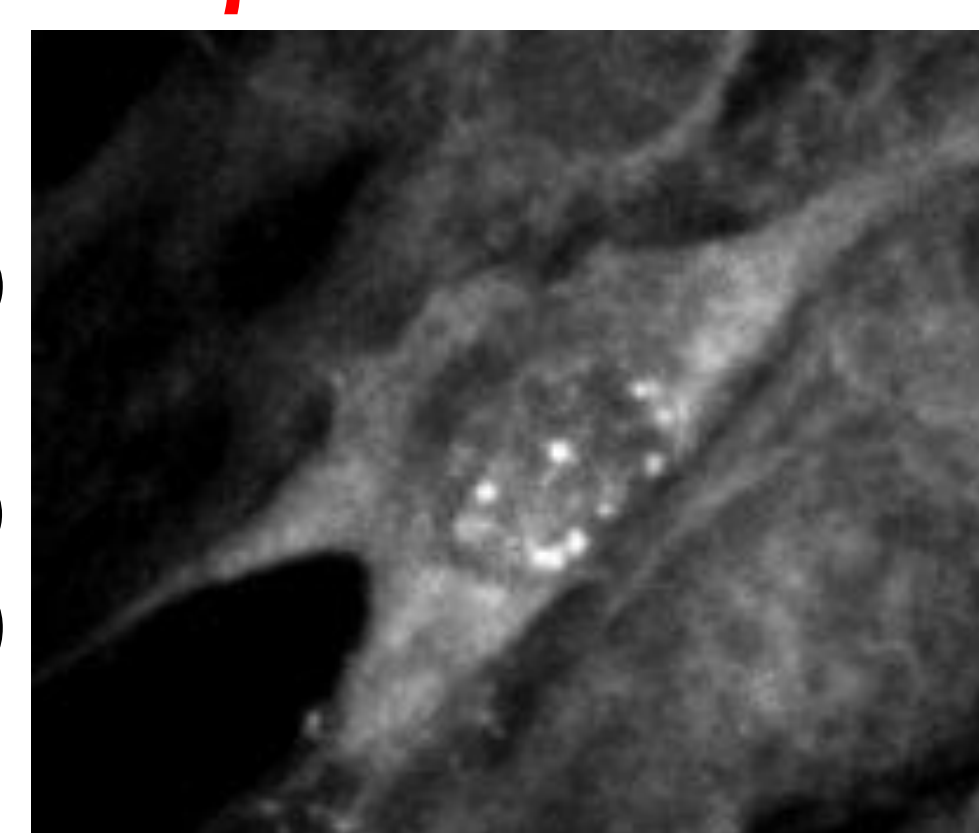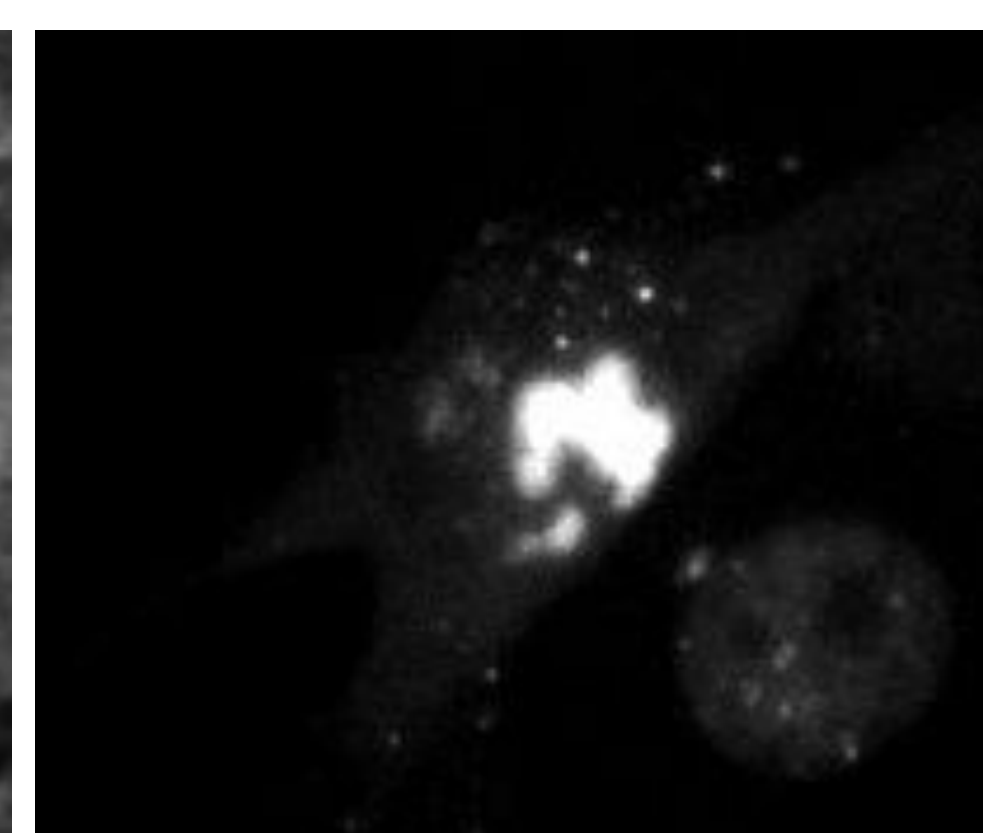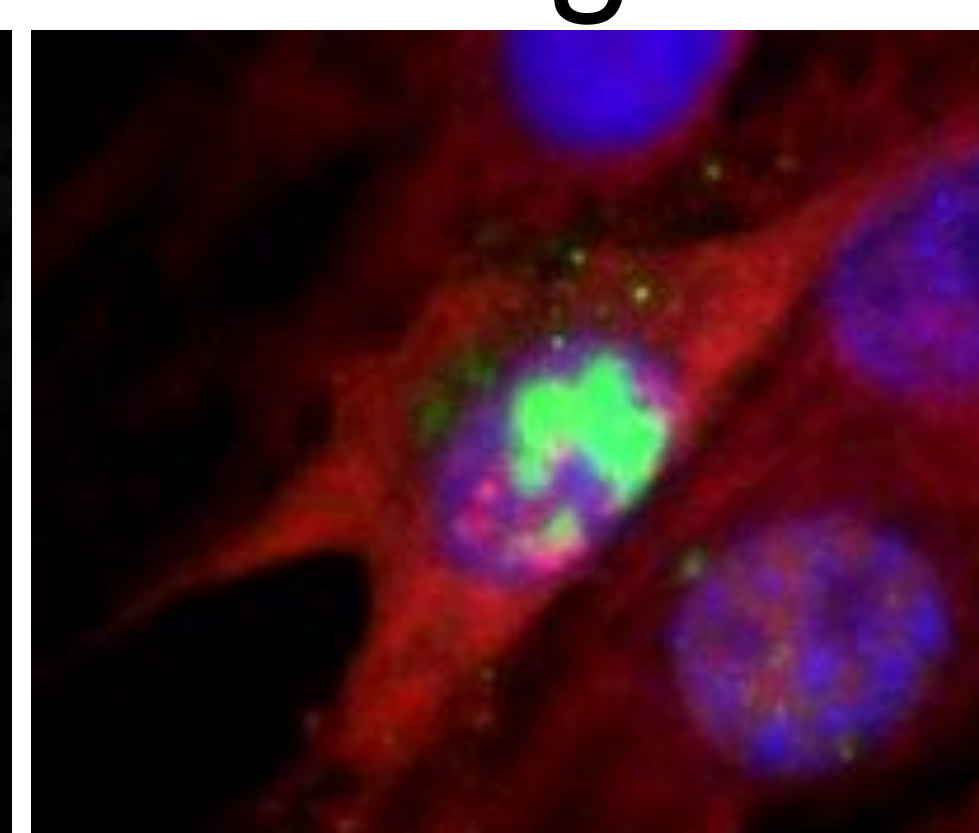

Cell 4

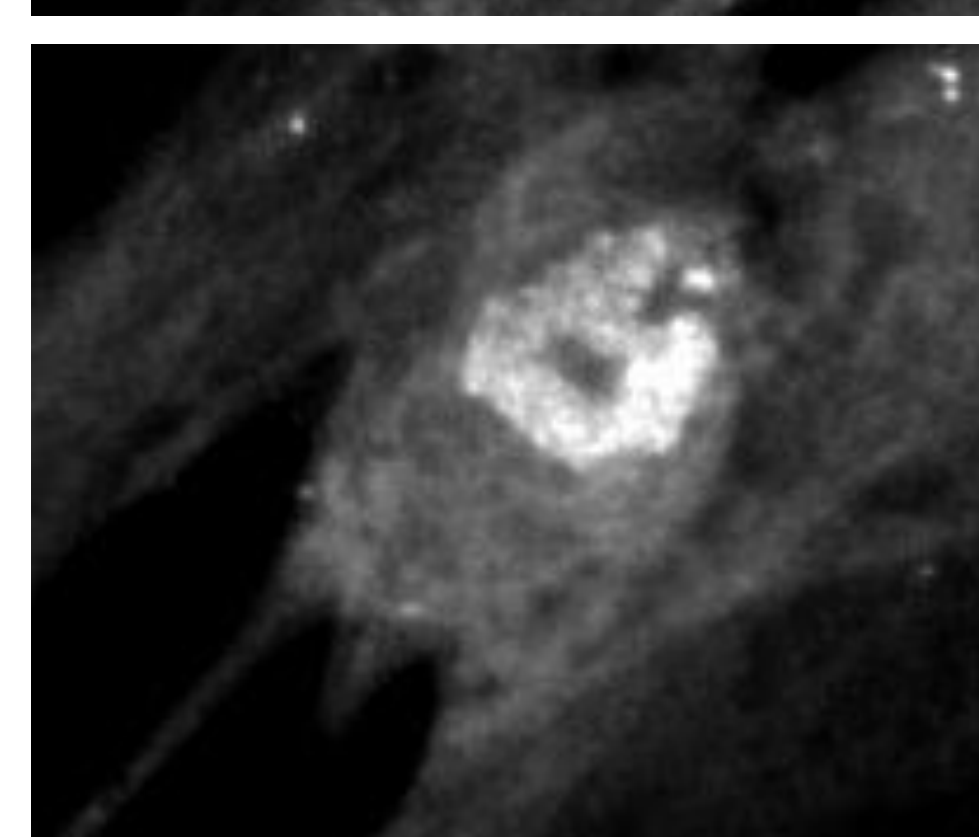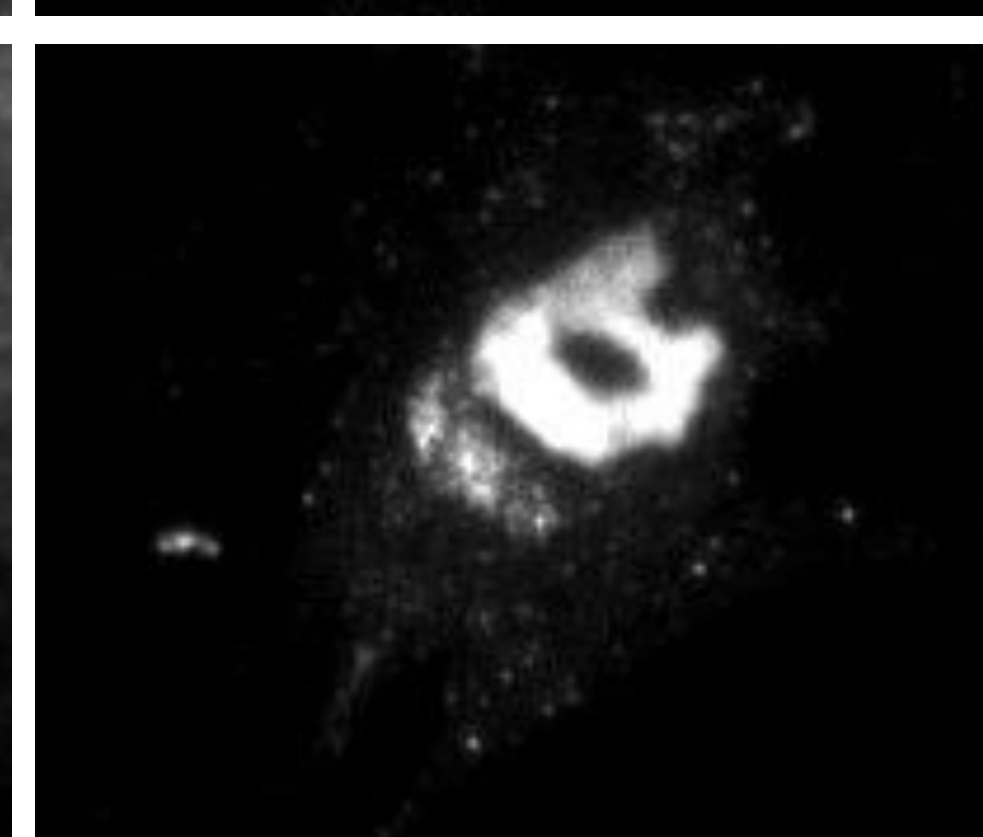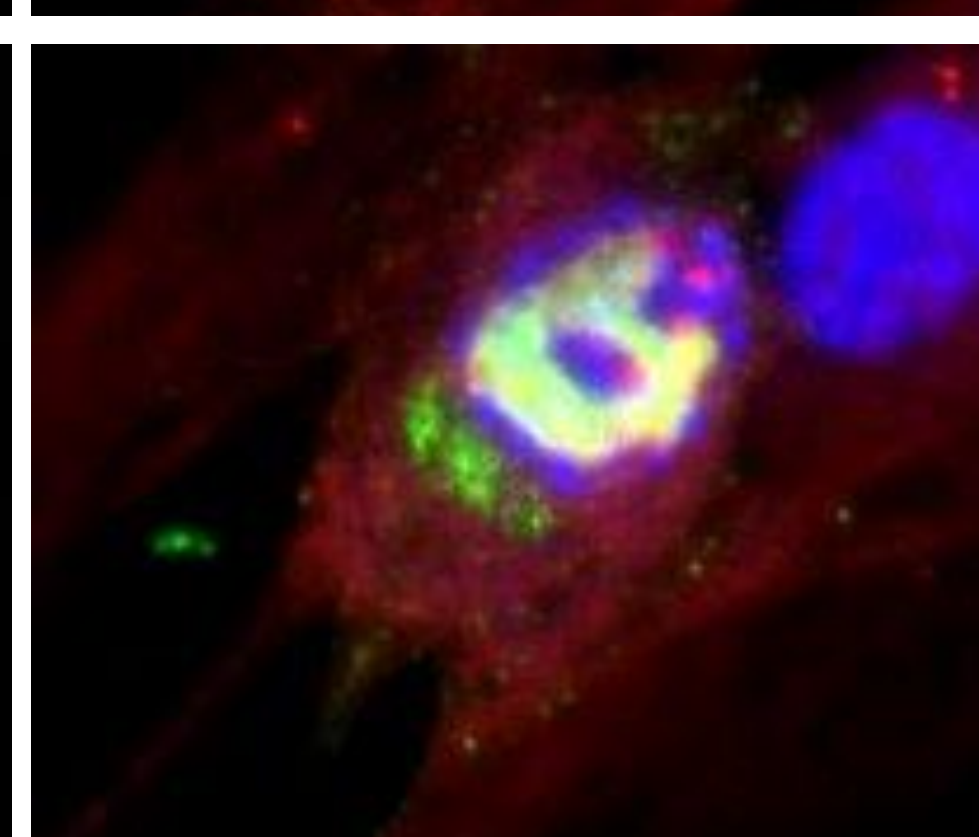

Supplement: supp [file elife_poa_e46339_Figure_6_figure_supplement_1.pdf › elife_poa_e46339_Figure_6_figure_supplement_1.pdf]
